# Supplementary material for: A multilayered post-GWAS assessment on genetic susceptibility to pancreatic cancer
Source: Genome Med. 2021 Feb 1;13:15. doi: 10.1186/s13073-020-00816-4 (PMC7849104; doi:10.1186/s13073-020-00816-4)
Supplement: Supplementary file 2 — Additional file 2: Table S4. List of the 510 SNPs prioritized according to their Local Moran Index (LMI). [file 13073_2020_816_MOESM2_ESM.xlsx]

## Sheet: Table S4
Table S4. List of the 510 SNPs prioritized according to their Local Moran Index (LMI)
SNP.ID	chr	position(hg19)	Odds.ratio	p-value	LMI	Annotation	Detailed.Annotation	Distance.to.TSS	Nearest.PromoterID	Entrez.ID	Nearest.Unigene	Nearest.Refseq	Nearest.Ensembl	Gene.Name	Gene.Alias	Gene.Description	Gene.Type	CredibleSet	PC_lncRNA
chr1_150974311_A_G	1	150974311	1.8463	1.25309e-06	18.2388	intron (NM_001040217, intron 2 of 9)	intron (NM_001040217, intron 2 of 9)	4962	NM_001163260	55793	Hs.743952	NM_018379	ENSG00000143409	FAM63A	MINDY-1	family with sequence similarity 63 member A	protein-coding		NO
chr1_150902203_A_T	1	150902203	1.7999	4.93885e-06	16.872	intron (NM_012432, intron 2 of 21)	intron (NM_012432, intron 2 of 21)	3388	NM_001243491	9869	Hs.643565	NM_012432	ENSG00000143379	SETDB1	ESET|H3-K9-HMTase4|KG1T|KMT1E|TDRD21	SET domain bifurcated 1	protein-coding	Yes	NO
chr16_75263661_A_G	16	75263661	1.62417	0.000414392	12.3778	exon (NM_001170721, exon 6 of 6)	exon (NM_001170721, exon 6 of 6)	3380	NR_109777	100506281	Hs.710310	NR_109777		LOC100506281	-	uncharacterized LOC100506281	ncRNA	Yes	NO
rs12675523	8	114199799	1.58525	0.00126703	12.0088	intron (NM_052900, intron 3 of 68)	intron (NM_052900, intron 3 of 68)	189583	NM_198124	114788	Hs.91381	NM_052900	ENSG00000164796	CSMD3	-	CUB and Sushi multiple domains 3	protein-coding		NO
rs10955648	8	114160622	1.54607	0.00130047	11.8598	intron (NM_052900, intron 4 of 68)	L2c|LINE|L2	228760	NM_198124	114788	Hs.91381	NM_052900	ENSG00000164796	CSMD3	-	CUB and Sushi multiple domains 3	protein-coding	Yes	NO
rs6993801	8	114296513	1.48638	0.00296408	11.3321	intron (NM_052900, intron 2 of 68)	intron (NM_052900, intron 2 of 68)	92869	NM_198124	114788	Hs.91381	NM_052900	ENSG00000164796	CSMD3	-	CUB and Sushi multiple domains 3	protein-coding		NO
rs72699638	9	6772101	0.604153	0.000966793	11.2663	intron (NM_015061, intron 1 of 21)	intron (NM_015061, intron 1 of 21)	14460	NR_130707	23081	Hs.709425	NM_015061	ENSG00000107077	KDM4C	GASC1|JHDM3C|JMJD2C|TDRD14C	lysine demethylase 4C	protein-coding	Yes	NO
rs11794756	9	6785243	0.588757	0.000504053	11.0431	intron (NM_015061, intron 1 of 21)	MLT1C|LTR|ERVL-MaLR	27602	NR_130707	23081	Hs.709425	NM_015061	ENSG00000107077	KDM4C	GASC1|JHDM3C|JMJD2C|TDRD14C	lysine demethylase 4C	protein-coding		NO
c1_pos120983010	1	121281487	1.53406	0.00182603	10.898	intron (NR_003955, intron 1 of 7)	MER92A|LTR|ERV1	20577	NR_003955	647121	Hs.697682	NR_003955	ENSG00000231752	EMBP1	-	embigin pseudogene 1	pseudo	Yes	NO
chr1_121305034_C_T	1	121305034	1.49402	0.00318481	10.8979	intron (NR_003955, intron 4 of 7)	intron (NR_003955, intron 4 of 7)	44124	NR_003955	647121	Hs.697682	NR_003955	ENSG00000231752	EMBP1	-	embigin pseudogene 1	pseudo		NO
chr10_21182034_A_C	10	21182034	1.31307	0.0524419	10.6548	intron (NM_006393, intron 2 of 27)	intron (NM_006393, intron 2 of 27)	4497	NM_006393	10529	Hs.5025	NM_006393	ENSG00000078114	NEBL	LASP2|LNEBL	nebulette	protein-coding	Yes	NO
rs12682363	8	114227020	1.42623	0.0055019	10.346	intron (NM_052900, intron 3 of 68)	intron (NM_052900, intron 3 of 68)	162362	NM_198124	114788	Hs.91381	NM_052900	ENSG00000164796	CSMD3	-	CUB and Sushi multiple domains 3	protein-coding		NO
rs9534246	13	46446427	0.639919	0.000349112	10.1557	Intergenic	Intergenic	-20581	NM_198849	283514	Hs.368483	NM_198849	ENSG00000215475	SIAH3	-	siah E3 ubiquitin protein ligase family member 3	protein-coding		NO
rs68065966	13	46405544	0.7582	0.0357192	10.0821	intron (NM_198849, intron 1 of 1)	intron (NM_198849, intron 1 of 1)	20302	NM_198849	283514	Hs.368483	NM_198849	ENSG00000215475	SIAH3	-	siah E3 ubiquitin protein ligase family member 3	protein-coding	Yes	NO
rs11148419	13	58605508	1.43208	0.00260965	9.6452	Intergenic	Intergenic	-134453	NR_120416	101926897	Hs.640215	NR_120416	ENSG00000277448	LOC101926897	-	uncharacterized LOC101926897	ncRNA		NO
kgp10151875	13	58544340	0.709561	0.00740169	9.6403	Intergenic	Intergenic	-195621	NR_120416	101926897	Hs.640215	NR_120416	ENSG00000277448	LOC101926897	-	uncharacterized LOC101926897	ncRNA	Yes	NO
rs62482412	7	103017023	0.672391	0.00122681	9.46365	intron (NR_135801, intron 17 of 17)	intron (NR_135801, intron 17 of 17)	29052	NM_001204453	5701	Hs.437366	NM_002803	ENSG00000161057	PSMC2	MSS1|Nbla10058|S7	proteasome 26S subunit, ATPase 2	protein-coding		NO
rs8175950	7	142661695	1.47929	8.38833e-05	9.31724	Intergenic	Intergenic	-2192	NM_000420	3792	Hs.368588	NM_000420	ENSG00000197993	KEL	CD238|ECE3	Kell blood group, metallo-endopeptidase	protein-coding	Yes	NO
chr4_110647338_INDEL_T	4	110647337	1.41042	0.00713681	9.26426	intron (NM_030821, intron 1 of 3)	L2|LINE|L2	3905	NM_030821	81579	Hs.389452	NM_030821	ENSG00000123739	PLA2G12A	GXII|PLA2G12|ROSSY	phospholipase A2 group XIIA	protein-coding	Yes	NO
rs12258494	10	44233503	1.51546	2.59658e-05	9.25843	Intergenic	Intergenic	40770	NR_134484	102724264	Hs.140667	NR_134483	ENSG00000234973	LOC102724264	-	uncharacterized LOC102724264	ncRNA		NO
rs4080021	10	44268654	1.50855	3.48536e-05	9.22471	Intergenic	Intergenic	5619	NR_134484	102724264	Hs.140667	NR_134483	ENSG00000234973	LOC102724264	-	uncharacterized LOC102724264	ncRNA		NO
rs10230444	7	142792658	1.41751	0.00546715	9.03006	Intergenic	L1PB1|LINE|L1	-31776	NR_002140	89883	Hs.339818	NR_002140		OR6W1P	OR6W1|sdolf	olfactory receptor family 6 subfamily W member 1 pseudogene	pseudo		NO
rs10265609	7	142686688	1.41398	0.00758057	8.9913	Intergenic	L1P4|LINE|L1	-27185	NM_000420	3792	Hs.368588	NM_000420	ENSG00000197993	KEL	CD238|ECE3	Kell blood group, metallo-endopeptidase	protein-coding		NO
newrs6907580	6	117150008	1.50579	0.00407179	8.93058	exon (NM_001286355, exon 1 of 5)	exon (NM_001286355, exon 1 of 5)	212	NM_001286355	222545	Hs.266745	NM_148963	ENSG00000173612	GPRC6A	GPCR|bA86F4.3	G protein-coupled receptor class C group 6 member A	protein-coding	Yes	NO
rs17078438	6	117196211	1.43293	0.00804699	8.9056	Intergenic	Intergenic	-2165	NM_173560	222546	Hs.352276	NM_173560	ENSG00000185002	RFX6	MTCHRS|MTFS|RFXDC1|dJ955L16.1	regulatory factor X6	protein-coding		NO
rs11041611	11	7881899	0.697354	0.00984616	8.7474	intron (NR_036678, intron 6 of 7)	intron (NR_036678, intron 6 of 7)	11301	NR_027711	26343	Hs.382973	NR_027711		OR5E1P	HSTPCR24|OR5E1|TPCR24	olfactory receptor family 5 subfamily E member 1 pseudogene	pseudo		NO
rs62482372	7	102924512	0.688045	5.08446e-05	8.73643	Intergenic	Intergenic	-3599	NR_027768	349152	Hs.732579	NM_182634	ENSG00000170629	DPY19L2P2	-	DPY19L2 pseudogene 2	pseudo		NO
rs10023142	4	78271822	0.698383	0.00944679	8.55526	Intergenic	Intergenic	-161085	NM_006419	10563	Hs.100431	NM_006419	ENSG00000156234	CXCL13	ANGIE|ANGIE2|BCA-1|BCA1|BLC|BLR1L|SCYB13	C-X-C motif chemokine ligand 13	protein-coding	Yes	NO
rs1559121	4	78276420	0.717763	0.015106	8.55029	Intergenic	Intergenic	-156487	NM_006419	10563	Hs.100431	NM_006419	ENSG00000156234	CXCL13	ANGIE|ANGIE2|BCA-1|BCA1|BLC|BLR1L|SCYB13	C-X-C motif chemokine ligand 13	protein-coding		NO
chr13_45069050_A_C	13	45069050	1.47104	0.00167476	8.42522	intron (NM_183422, intron 1 of 2)	L1MB5|LINE|L1	-20613	NM_001243798	8848	Hs.436383	NM_006022	ENSG00000102804	TSC22D1	Ptg-2|TGFB1I4|TSC22	TSC22 domain family member 1	protein-coding		NO
chr4_110654640_A_G	4	110654640	1.50936	0.000973003	8.37584	Intergenic	L2|LINE|L2	-3398	NM_030821	81579	Hs.389452	NM_030821	ENSG00000123739	PLA2G12A	GXII|PLA2G12|ROSSY	phospholipase A2 group XIIA	protein-coding		NO
rs2584051	3	3842821	0.5807	3.14852e-05	8.37042	5' UTR (NM_001324189, exon 2 of 3)	5' UTR (NM_001324189, exon 2 of 3)	1706	NM_001324189	57633	Hs.163244	NM_020873	ENSG00000175928	LRRN1	FIGLER3|NLRR-1	leucine rich repeat neuronal 1	protein-coding		NO
kgp3489492	7	102807820	0.682594	6.97524e-05	8.31334	Intergenic	Intergenic	-18251	NM_198990	222236	Hs.324271	NM_198990	ENSG00000161048	NAPEPLD	FMP30|NAPE-PLD	N-acyl phosphatidylethanolamine phospholipase D	protein-coding		NO
rs2050502	10	44203201	1.5736	8.6337e-07	8.28073	Intergenic	Intergenic	-58875	NM_006973	7580	Hs.522885	NM_006973	ENSG00000169740	ZNF32	KOX30	zinc finger protein 32	protein-coding	Yes	NO
rs16888397	6	23978607	0.649225	0.00152959	8.20486	Intergenic	Intergenic	-147807	NM_080723	140767	Hs.726270	NM_080723	ENSG00000152954	NRSN1	VMP|p24	neurensin 1	protein-coding		NO
rs7857819	9	88194182	0.64446	0.00248212	8.15705	intron (NM_001330701, intron 23 of 25)	intron (NM_001330701, intron 23 of 25)	162762	NM_015239	23287	Hs.719980	NM_015239	ENSG00000135049	AGTPBP1	CCP1|NNA1	ATP/GTP binding protein 1	protein-coding		NO
chr22_29039427_C_T	22	29039427	1.48437	0.00315162	8.10862	intron (NM_001145418, intron 1 of 22)	intron (NM_001145418, intron 1 of 22)	36426	NM_001145418	23331	Hs.387856	NM_015281	ENSG00000100154	TTC28	TPRBK	tetratricopeptide repeat domain 28	protein-coding		NO
chr6_1705947_A_G	6	1705947	1.60664	0.000553589	8.09279	intron (NM_001500, intron 9 of 10)	L2c|LINE|L2	95266	NM_001453	2296	Hs.348883	NM_001453	ENSG00000054598	FOXC1	ARA|FKHL7|FREAC-3|FREAC3|IGDA|IHG1|IRID1|RIEG3	forkhead box C1	protein-coding	Yes	NO
rs74929941	6	23986922	0.649755	0.00173358	8.03051	Intergenic	MLT1A1|LTR|ERVL-MaLR	-139492	NM_080723	140767	Hs.726270	NM_080723	ENSG00000152954	NRSN1	VMP|p24	neurensin 1	protein-coding		NO
rs8021345	14	98943764	0.707093	0.00533083	7.97391	Intergenic	MIRb|SINE|MIR	-234186	NM_001346978	283598	Hs.448754	NM_182560	ENSG00000176605	C14orf177	-	chromosome 14 open reading frame 177	protein-coding	Yes	NO
rs2400352	14	98952825	0.706632	0.00519723	7.96532	Intergenic	L1ME2|LINE|L1	-225125	NM_001346978	283598	Hs.448754	NM_182560	ENSG00000176605	C14orf177	-	chromosome 14 open reading frame 177	protein-coding		NO
rs17097041	14	98964100	0.707266	0.00549529	7.91354	Intergenic	Intergenic	-213850	NM_001346978	283598	Hs.448754	NM_182560	ENSG00000176605	C14orf177	-	chromosome 14 open reading frame 177	protein-coding		NO
rs10266523	7	102974058	0.709955	0.000519831	7.89215	intron (NM_014377, intron 3 of 16)	L1ME2|LINE|L1	11262	NM_001129887	27000	Hs.558476	NM_014377	ENSG00000105821	DNAJC2	MPHOSPH11|MPP11|ZRF1|ZUO1	DnaJ heat shock protein family (Hsp40) member C2	protein-coding		NO
rs4244145	1	199971261	0.718893	0.00014446	7.88819	Intergenic	Intergenic	-25469	NM_205860	2494	Hs.33446	NM_003822	ENSG00000116833	NR5A2	B1F|B1F2|CPF|FTF|FTZ-F1|FTZ-F1beta|LRH-1|LRH1|hB1F-2	nuclear receptor subfamily 5 group A member 2	protein-coding		NO
rs11943366	4	80425028	0.709936	0.0152455	7.88122	intron (NR_038826, intron 2 of 3)	L1MD1|LINE|L1	11281	NR_038826	100506035	Hs.507664	NR_038826	ENSG00000250334	LINC00989	-	long intergenic non-protein coding RNA 989	ncRNA	Yes	NO
rs2816939	1	199985700	1.3904	0.000135452	7.87491	Intergenic	Intergenic	-11030	NM_205860	2494	Hs.33446	NM_003822	ENSG00000116833	NR5A2	B1F|B1F2|CPF|FTF|FTZ-F1|FTZ-F1beta|LRH-1|LRH1|hB1F-2	nuclear receptor subfamily 5 group A member 2	protein-coding		NO
rs2821347	1	199985792	1.3856	0.000164632	7.81163	Intergenic	Intergenic	-10938	NM_205860	2494	Hs.33446	NM_003822	ENSG00000116833	NR5A2	B1F|B1F2|CPF|FTF|FTZ-F1|FTZ-F1beta|LRH-1|LRH1|hB1F-2	nuclear receptor subfamily 5 group A member 2	protein-coding		NO
rs165030	15	46747113	0.702342	0.0165352	7.78972	Intergenic	Intergenic	-729290	NM_001198999	80031	Hs.511265	NM_020858	ENSG00000137872	SEMA6D	-	semaphorin 6D	protein-coding		NO
rs17003952	4	80468723	0.724812	0.0232128	7.77356	intron (NR_038826, intron 3 of 3)	LTR79|LTR|ERVL	54976	NR_038826	100506035	Hs.507664	NR_038826	ENSG00000250334	LINC00989	-	long intergenic non-protein coding RNA 989	ncRNA		NO
rs3790840	1	200016460	1.41916	1.6545e-05	7.76294	intron (NM_001276464, intron 3 of 6)	intron (NM_001276464, intron 3 of 6)	4507	NM_001276464	2494	Hs.33446	NM_003822	ENSG00000116833	NR5A2	B1F|B1F2|CPF|FTF|FTZ-F1|FTZ-F1beta|LRH-1|LRH1|hB1F-2	nuclear receptor subfamily 5 group A member 2	protein-coding		NO
rs9907142	17	45885687	0.653829	0.00155617	7.75296	exon (NM_145798, exon 23 of 23)	exon (NM_145798, exon 23 of 23)	13460	NM_145798	114881	Hs.463320	NM_017731	ENSG00000006025	OSBPL7	ORP7	oxysterol binding protein like 7	protein-coding	Yes	NO
rs7220419	17	45908405	0.684485	0.00553004	7.73732	promoter-TSS (NM_033413)	promoter-TSS (NM_033413)	502	NR_037575	124995	Hs.347535	NM_145255	ENSG00000159111	MRPL10	L10MT|MRP-L10|MRP-L8|MRPL8|RPML8	mitochondrial ribosomal protein L10	protein-coding		NO
rs16933365	11	7901644	0.660476	0.00247309	7.71432	intron (NR_036678, intron 4 of 7)	intron (NR_036678, intron 4 of 7)	25858	NR_036678	283299	Hs.501825	NM_001190788	ENSG00000254951	LOC283299	-	uncharacterized LOC283299	ncRNA		NO
rs17003982	4	80520780	0.725355	0.0294871	7.69782	Intergenic	Intergenic	107033	NR_038826	100506035	Hs.507664	NR_038826	ENSG00000250334	LINC00989	-	long intergenic non-protein coding RNA 989	ncRNA		NO
chr6_1707399_A_G	6	1707399	1.47707	0.00187211	7.69388	intron (NM_001500, intron 9 of 10)	intron (NM_001500, intron 9 of 10)	96718	NM_001453	2296	Hs.348883	NM_001453	ENSG00000054598	FOXC1	ARA|FKHL7|FREAC-3|FREAC3|IGDA|IHG1|IRID1|RIEG3	forkhead box C1	protein-coding		NO
chr2_190211063_G_T	2	190211063	1.49951	0.00022545	7.6814	Intergenic	Intergenic	-95096	NM_001303096	84128	Hs.399984	NM_032168	ENSG00000115368	WDR75	NET16|UTP17	WD repeat domain 75	protein-coding		NO
chr15_46742501_C_T	15	46742501	0.731832	0.0302302	7.64382	Intergenic	LTR16A|LTR|ERVL	-733902	NM_001198999	80031	Hs.511265	NM_020858	ENSG00000137872	SEMA6D	-	semaphorin 6D	protein-coding		NO
rs5025411	7	102798779	1.395	0.00418877	7.64259	Intergenic	Intergenic	-9210	NM_198990	222236	Hs.324271	NM_198990	ENSG00000161048	NAPEPLD	FMP30|NAPE-PLD	N-acyl phosphatidylethanolamine phospholipase D	protein-coding	Yes	NO
chr2_23814122_A_G	2	23814122	1.29802	0.0538768	7.5964	intron (NM_052920, intron 3 of 13)	L2a|LINE|L2	205824	NM_052920	114818	Hs.130593	NM_025067	ENSG00000119771	KLHL29	KBTBD9	kelch like family member 29	protein-coding		NO
rs17089786	4	60616622	0.705115	0.00491813	7.58919	Intergenic	Intergenic	737331	NR_133942	105377247	Hs.298228	NR_133941	ENSG00000251266	LOC105377247	-	uncharacterized LOC105377247	ncRNA	Yes	NO
rs6804377	3	89271087	0.645669	0.00122368	7.5845	intron (NM_182644, intron 3 of 6)	intron (NM_182644, intron 3 of 6)	114413	NM_005233	2042	Hs.123642	NM_005233	ENSG00000044524	EPHA3	EK4|ETK|ETK1|HEK|HEK4|TYRO4	EPH receptor A3	protein-coding		NO
rs78244999	6	24000427	0.660516	0.00163087	7.56236	Intergenic	Intergenic	-125987	NM_080723	140767	Hs.726270	NM_080723	ENSG00000152954	NRSN1	VMP|p24	neurensin 1	protein-coding		NO
rs11955721	5	51666685	0.699025	0.00308527	7.52484	Intergenic	Intergenic	-417089	NM_015946	53918	Hs.644352	NM_015946	ENSG00000152684	PELO	CGI-17|PRO1770	pelota homolog (Drosophila)	protein-coding		NO
rs3906810	4	80474360	0.740871	0.0364065	7.4896	intron (NR_038826, intron 3 of 3)	L2a|LINE|L2	60613	NR_038826	100506035	Hs.507664	NR_038826	ENSG00000250334	LINC00989	-	long intergenic non-protein coding RNA 989	ncRNA		NO
chr2_190115663_C_T	2	190115663	1.45804	0.000807461	7.46895	Intergenic	Intergenic	-71058	NM_000393	1290	Hs.445827	NM_000393	ENSG00000204262	COL5A2	EDSC	collagen type V alpha 2 chain	protein-coding	Yes	NO
chr22_28663507_A_G	22	28663507	1.48536	0.00278606	7.43824	intron (NM_001145418, intron 5 of 22)	intron (NM_001145418, intron 5 of 22)	-192350	NR_106713	102466081		NR_106713	ENSG00000276162	MIR5739	hsa-mir-5739	microRNA 5739	ncRNA		NO
rs4600947	4	60627772	0.708486	0.00517909	7.43184	Intergenic	Intergenic	748481	NR_133942	105377247	Hs.298228	NR_133941	ENSG00000251266	LOC105377247	-	uncharacterized LOC105377247	ncRNA		NO
rs6464410	7	154037662	0.692013	0.00498011	7.42441	intron (NM_001936, intron 1 of 25)	intron (NM_001936, intron 1 of 25)	35365	NM_001936	1804	Hs.490684	NM_001936	ENSG00000130226	DPP6	DPL1|DPPX|MRD33|VF2	dipeptidyl peptidase like 6	protein-coding	Yes	NO
rs4465241	1	199963622	0.705999	4.57647e-05	7.35179	Intergenic	Intergenic	-33108	NM_205860	2494	Hs.33446	NM_003822	ENSG00000116833	NR5A2	B1F|B1F2|CPF|FTF|FTZ-F1|FTZ-F1beta|LRH-1|LRH1|hB1F-2	nuclear receptor subfamily 5 group A member 2	protein-coding		NO
rs11065142	12	120931756	0.712399	0.00345188	7.33093	intron (NR_038854, intron 1 of 1)	intron (NR_038854, intron 1 of 1)	1993	NR_038854	100506668	Hs.660080	NR_038854	ENSG00000248008	NRAV	DYNLL1-AS1|DYNLL1AS1	negative regulator of antiviral response (non-protein coding)	ncRNA		NO
rs11613214	12	120915220	0.717511	0.00409849	7.32904	intron (NM_001037494, intron 1 of 2)	L2c|LINE|L2	7560	NM_001037494	8655	Hs.5120	NM_003746	ENSG00000088986	DYNLL1	DLC1|DLC8|DNCL1|DNCLC1|LC8|LC8a|PIN|hdlc1	dynein light chain LC8-type 1	protein-coding	Yes	NO
chr15_100274747_C_T	15	100274747	1.40841	0.0153453	7.26785	Intergenic	Intergenic	-1098	NM_001284422	145748	Hs.562568	NM_152449	ENSG00000183060	LYSMD4	-	LysM domain containing 4	protein-coding	Yes	NO
chr15_63133202_A_C	15	63133202	1.56622	0.00191551	7.25328	3' UTR (NM_015059, exon 56 of 56)	3' UTR (NM_015059, exon 56 of 56)	17046	NR_029709	406965		NR_029709	ENSG00000211137	MIR190A	MIR190|MIRN190|hsa-mir-190a|miR-190|mir-190a	microRNA 190a	ncRNA		NO
rs72701430	9	6831637	0.669416	0.00666106	7.22106	intron (NM_015061, intron 4 of 21)	AluSx|SINE|Alu	73996	NR_130707	23081	Hs.709425	NM_015061	ENSG00000107077	KDM4C	GASC1|JHDM3C|JMJD2C|TDRD14C	lysine demethylase 4C	protein-coding		NO
chr17_7745298_C_T	17	7745298	0.647253	0.00168038	7.21624	intron (NM_001080424, intron 1 of 21)	CpG	2063	NM_001080424	23135	Hs.223678	NM_001080424	ENSG00000132510	KDM6B	JMJD3	lysine demethylase 6B	protein-coding	Yes	NO
rs4147452	1	199964344	0.701908	0.000566489	7.19276	Intergenic	Intergenic	-32386	NM_205860	2494	Hs.33446	NM_003822	ENSG00000116833	NR5A2	B1F|B1F2|CPF|FTF|FTZ-F1|FTZ-F1beta|LRH-1|LRH1|hB1F-2	nuclear receptor subfamily 5 group A member 2	protein-coding		NO
rs17089834	4	60680656	0.70689	0.0051717	7.18404	Intergenic	Intergenic	801365	NR_133942	105377247	Hs.298228	NR_133941	ENSG00000251266	LOC105377247	-	uncharacterized LOC105377247	ncRNA		NO
rs1861731	7	102799409	1.38499	0.00074112	7.17979	Intergenic	Intergenic	-9840	NM_198990	222236	Hs.324271	NM_198990	ENSG00000161048	NAPEPLD	FMP30|NAPE-PLD	N-acyl phosphatidylethanolamine phospholipase D	protein-coding		NO
rs10988617	9	132920576	1.48162	0.000863873	7.14825	Intergenic	Intergenic	-14078	NR_135124	401554	Hs.522437	NR_135124	ENSG00000196979	LOC401554	-	uncharacterized LOC401554	ncRNA		NO
chr20_13829493_A_G	20	13829493	0.70179	0.0154969	7.13669	TTS (NM_001271539)	TTS (NM_001271539)	63821	NM_001039375	79133	Hs.472165	NM_024120	ENSG00000101247	NDUFAF5	C20orf7|bA526K24.2|dJ842G6.1	NADH:ubiquinone oxidoreductase complex assembly factor 5	protein-coding	Yes	NO
chr20_13896379_G_T	20	13896379	0.74053	0.0382868	7.12612	intron (NR_073206, intron 4 of 20)	intron (NR_073206, intron 4 of 20)	74886	NM_001271539	80343	Hs.590879	NM_025229	ENSG00000101251	SEL1L2	C20orf50	SEL1L2 ERAD E3 ligase adaptor subunit	protein-coding		NO
chr11_60197299_A_G	11	60197299	1.42446	0.0106975	7.09532	exon (NM_023945, exon 1 of 5)	exon (NM_023945, exon 1 of 5)	237	NM_023945	64232	Hs.178066	NM_023945	ENSG00000166930	MS4A5	CD20-L2|CD20L2|TETM4	membrane spanning 4-domains A5	protein-coding		NO
rs3801472	7	75629778	1.41539	0.00212495	7.08978	intron (NR_134486, intron 6 of 6)	intron (NR_134486, intron 6 of 6)	-5786	NM_001317803	83862	Hs.488835	NM_031925	ENSG00000189077	TMEM120A	NET29|TMPIT	transmembrane protein 120A	protein-coding		NO
rs759264	7	154040152	0.711661	0.0109373	7.08891	intron (NM_001936, intron 1 of 25)	intron (NM_001936, intron 1 of 25)	37855	NM_001936	1804	Hs.490684	NM_001936	ENSG00000130226	DPP6	DPL1|DPPX|MRD33|VF2	dipeptidyl peptidase like 6	protein-coding		NO
rs75618466	6	24009711	0.701202	0.00597293	7.08741	Intergenic	Intergenic	-116703	NM_080723	140767	Hs.726270	NM_080723	ENSG00000152954	NRSN1	VMP|p24	neurensin 1	protein-coding		NO
chr11_5726811_G_T	11	5726811	1.37889	0.0092401	7.08584	intron (NM_001199573, intron 4 of 7)	intron (NM_001199573, intron 4 of 7)	15994	NM_006074	10346	Hs.501778	NM_006074	ENSG00000132274	TRIM22	GPSTAF50|RNF94|STAF50	tripartite motif containing 22	protein-coding	Yes	NO
rs12285602	11	5740634	1.36776	0.011296	7.07792	Intergenic	Intergenic	-17044	NM_001005180	387748	Hs.689609	NM_001005180	ENSG00000181023	OR56B1	OR11-65|OR56B1P	olfactory receptor family 56 subfamily B member 1	protein-coding		NO
chr13_45009532_A_C	13	45009532	1.42607	0.000355271	7.07534	intron (NM_001243797, intron 2 of 2)	intron (NM_001243797, intron 2 of 2)	1528	NM_006022	8848	Hs.436383	NM_006022	ENSG00000102804	TSC22D1	Ptg-2|TGFB1I4|TSC22	TSC22 domain family member 1	protein-coding	Yes	NO
chr17_60679935_C_G	17	60679935	0.726308	0.0181438	7.07142	intron (NM_001284333, intron 20 of 22)	intron (NM_001284333, intron 20 of 22)	-24827	NM_006039	9902	Hs.7835	NM_006039	ENSG00000011028	MRC2	CD280|CLEC13E|ENDO180|UPARAP	mannose receptor C type 2	protein-coding		NO
rs12226886	11	29353459	0.699326	0.00064561	7.04035	Intergenic	Intergenic	650481	NR_132652	106456574	Hs.128812	NR_132652	ENSG00000261340	LINC01616	n341006	long intergenic non-protein coding RNA 1616	ncRNA	Yes	NO
chr17_60664361_C_T	17	60664361	0.731162	0.0222784	7.02781	intron (NM_001284333, intron 17 of 22)	intron (NM_001284333, intron 17 of 22)	-40401	NM_006039	9902	Hs.7835	NM_006039	ENSG00000011028	MRC2	CD280|CLEC13E|ENDO180|UPARAP	mannose receptor C type 2	protein-coding	Yes	NO
rs9625440	22	28643603	1.47928	0.00319236	7.01139	intron (NM_001145418, intron 5 of 22)	L2c|LINE|L2	-212254	NR_106713	102466081		NR_106713	ENSG00000276162	MIR5739	hsa-mir-5739	microRNA 5739	ncRNA		NO
chr17_7761926_C_T	17	7761926	0.627018	0.000665689	6.99932	promoter-TSS (NM_001320924)	promoter-TSS (NM_001320924)	-717	NM_001320925	84316	Hs.565094	NM_032356	ENSG00000183011	NAA38	LSMD1|PFAAP2	N(alpha)-acetyltransferase 38, NatC auxiliary subunit	protein-coding		NO
rs62569245	9	88308082	1.38927	0.00259358	6.99304	intron (NM_001286715, intron 1 of 24)	L2|LINE|L2	48862	NM_015239	23287	Hs.719980	NM_015239	ENSG00000135049	AGTPBP1	CCP1|NNA1	ATP/GTP binding protein 1	protein-coding		NO
rs2482838	10	30433291	0.694425	0.00517934	6.98895	Intergenic	Intergenic	-67490	NR_120653	101929279	Hs.559153	NR_120653		LOC101929279	-	uncharacterized LOC101929279	ncRNA	Yes	NO
chr6_77773428_C_T	6	77773428	0.762299	0.0631411	6.97626	Intergenic	L1M2|LINE|L1	400311	NM_000863	3351	Hs.123016	NM_000863	ENSG00000135312	HTR1B	5-HT-1B|5-HT-1D-beta|5-HT1B|5-HT1DB|HTR1D2|HTR1DB|S12	5-hydroxytryptamine receptor 1B	protein-coding	Yes	NO
rs13176512	5	51503850	0.740136	0.0105359	6.97435	Intergenic	MLT1B|LTR|ERVL-MaLR	-579924	NM_015946	53918	Hs.644352	NM_015946	ENSG00000152684	PELO	CGI-17|PRO1770	pelota homolog (Drosophila)	protein-coding	Yes	NO
chr2_23777026_A_G	2	23777026	1.56255	0.00166163	6.97328	intron (NM_052920, intron 2 of 13)	intron (NM_052920, intron 2 of 13)	168728	NM_052920	114818	Hs.130593	NM_025067	ENSG00000119771	KLHL29	KBTBD9	kelch like family member 29	protein-coding	Yes	NO
rs72929111	18	50177468	1.57537	0.0011793	6.96962	intron (NM_005215, intron 1 of 28)	intron (NM_005215, intron 1 of 28)	310926	NM_005215	1630	Hs.162025	NM_005215	ENSG00000187323	DCC	CRC18|CRCR1|IGDCC1|MRMV1|NTN1R1	DCC netrin 1 receptor	protein-coding	Yes	NO
rs11209041	1	41325801	0.719232	0.0179831	6.9684	TTS (NM_133467)	TTS (NM_133467)	2217	NM_133467	163732	Hs.355820	NM_133467	ENSG00000179862	CITED4	-	Cbp/p300 interacting transactivator with Glu/Asp rich carboxy-terminal domain 4	protein-coding	Yes	NO
rs12108917	5	21747442	1.29946	0.0535546	6.95042	Intergenic	HAL1|LINE|L1	-137121	NR_132787	106635539		NR_132787		SNORA105A	-	small nucleolar RNA, H/ACA box 105A	snoRNA	Yes	NO
chr17_46932195_A_G	17	46932195	1.60621	0.000845516	6.94505	intron (NM_005831, intron 9 of 12)	intron (NM_005831, intron 9 of 12)	23845	NM_001261395	10241	Hs.514920	NM_005831	ENSG00000136436	CALCOCO2	NDP52	calcium binding and coiled-coil domain 2	protein-coding	Yes	NO
exm694014	8	30701995	1.49476	0.000324214	6.93248	exon (NM_031271, exon 1 of 4)	exon (NM_031271, exon 1 of 4)	4538	NM_031271	56154	Hs.458316	NM_031271	ENSG00000133863	TEX15	CT42	testis expressed 15, meiosis and synapsis associated	protein-coding		NO
exm693963	8	30700598	1.49394	0.000217359	6.90699	exon (NM_031271, exon 1 of 4)	exon (NM_031271, exon 1 of 4)	5935	NM_031271	56154	Hs.458316	NM_031271	ENSG00000133863	TEX15	CT42	testis expressed 15, meiosis and synapsis associated	protein-coding	Yes	NO
rs9918610	7	154057993	0.730082	0.0193005	6.90358	intron (NM_001936, intron 1 of 25)	intron (NM_001936, intron 1 of 25)	55696	NM_001936	1804	Hs.490684	NM_001936	ENSG00000130226	DPP6	DPL1|DPPX|MRD33|VF2	dipeptidyl peptidase like 6	protein-coding		NO
rs12682787	9	88122883	1.30795	0.010559	6.89773	Intergenic	Intergenic	234061	NM_015239	23287	Hs.719980	NM_015239	ENSG00000135049	AGTPBP1	CCP1|NNA1	ATP/GTP binding protein 1	protein-coding	Yes	NO
rs2228083	9	116152940	1.38037	0.00636121	6.89744	exon (NM_000031, exon 6 of 12)	exon (NM_000031, exon 6 of 12)	10460	NM_001317745	210	Hs.1227	NM_000031	ENSG00000148218	ALAD	ALADH|PBGS	aminolevulinate dehydratase	protein-coding	Yes	NO
chr1_87859293_C_G	1	87859293	1.43952	2.41432e-05	6.89063	Intergenic	Intergenic	-21955	NR_038324	100505768	Hs.125247	NR_038324	ENSG00000227290	LINC01364	-	long intergenic non-protein coding RNA 1364	ncRNA		NO
chr11_60162000_A_G	11	60162000	1.34655	0.0310911	6.88345	3' UTR (NM_206938, exon 6 of 6)	3' UTR (NM_206938, exon 6 of 6)	-1487	NR_049734	84689	Hs.709736	NM_032597	ENSG00000166928	MS4A14	MS4A16|NYD-SP21	membrane spanning 4-domains A14	protein-coding	Yes	NO
rs80221863	11	111272450	1.3966	0.00737606	6.88202	Intergenic	Intergenic	16461	NR_046085	100132078	Hs.672662	NR_046085	ENSG00000255428	LOC100132078	-	uncharacterized LOC100132078	ncRNA		NO
rs9489537	6	119220748	1.52881	0.00188037	6.88051	intron (NM_014034, intron 1 of 3)	intron (NM_014034, intron 1 of 3)	5507	NM_014034	25842	Hs.292316	NM_014034	ENSG00000111875	ASF1A	CGI-98|CIA|HSPC146	anti-silencing function 1A histone chaperone	protein-coding	Yes	NO
rs12316544	12	14737497	1.46076	0.00164072	6.87328	intron (NR_120465, intron 2 of 5)	Tigger3|DNA|TcMar-Tigger	-16706	NM_024829	79887	Hs.131933	NM_024829	ENSG00000121316	PLBD1	-	phospholipase B domain containing 1	protein-coding	Yes	NO
rs6656594	1	199864160	1.33552	0.00709954	6.87081	Intergenic	Intergenic	-132570	NM_205860	2494	Hs.33446	NM_003822	ENSG00000116833	NR5A2	B1F|B1F2|CPF|FTF|FTZ-F1|FTZ-F1beta|LRH-1|LRH1|hB1F-2	nuclear receptor subfamily 5 group A member 2	protein-coding	Yes	NO
rs12410101	1	94210906	1.37833	0.00942414	6.86592	intron (NM_001261408, intron 2 of 13)	intron (NM_001261408, intron 2 of 13)	-63512	NM_003567	8412	Hs.36958	NM_003567	ENSG00000137936	BCAR3	NSP2|SH2D3B	breast cancer anti-estrogen resistance 3	protein-coding	Yes	NO
newrs78738447	9	116191244	1.53807	0.000158268	6.86354	intron (NM_001278630, intron 13 of 13)	intron (NM_001278630, intron 13 of 13)	-15765	NM_144488	5998	Hs.494875	NM_017790	ENSG00000138835	RGS3	C2PA|RGP3	regulator of G-protein signaling 3	protein-coding		NO
rs2737621	1	199997403	1.3424	0.00113165	6.85944	intron (NM_003822, intron 1 of 6)	intron (NM_003822, intron 1 of 6)	673	NM_003822	2494	Hs.33446	NM_003822	ENSG00000116833	NR5A2	B1F|B1F2|CPF|FTF|FTZ-F1|FTZ-F1beta|LRH-1|LRH1|hB1F-2	nuclear receptor subfamily 5 group A member 2	protein-coding		NO
rs1511478	6	23976276	0.686614	0.00225387	6.84834	Intergenic	Intergenic	-150138	NM_080723	140767	Hs.726270	NM_080723	ENSG00000152954	NRSN1	VMP|p24	neurensin 1	protein-coding		NO
rs10158448	1	94228900	1.37372	0.00966585	6.82486	intron (NM_001261408, intron 2 of 13)	AluJr4|SINE|Alu	-81506	NM_003567	8412	Hs.36958	NM_003567	ENSG00000137936	BCAR3	NSP2|SH2D3B	breast cancer anti-estrogen resistance 3	protein-coding		NO
rs28528341	11	111384944	1.39308	0.0215469	6.8198	promoter-TSS (NM_001100388)	promoter-TSS (NM_001100388)	-566	NM_207430	399949	Hs.411600	NM_207430	ENSG00000183644	C11orf88	-	chromosome 11 open reading frame 88	protein-coding		NO
rs3824479	9	107604394	0.697077	0.00438284	6.81106	intron (NM_005502, intron 8 of 49)	intron (NM_005502, intron 8 of 49)	78372	NR_130759	55335	Hs.429294	NM_018376	ENSG00000165028	NIPSNAP3B	FP944|NIPSNAP3|SNAP1	nipsnap homolog 3B	protein-coding		NO
rs10215807	7	6780231	0.724581	0.0259168	6.7996	intron (NR_002217, intron 2 of 5)	L1ME4a|LINE|L1	5295	NR_002217	441194	Hs.715590	NR_002217	ENSG00000187953	PMS2CL	PMS2P13	PMS2 C-terminal like pseudogene	pseudo		NO
chr22_28699302_G_T	22	28699302	1.4771	0.00316864	6.79179	intron (NM_001145418, intron 3 of 22)	intron (NM_001145418, intron 3 of 22)	-156555	NR_106713	102466081		NR_106713	ENSG00000276162	MIR5739	hsa-mir-5739	microRNA 5739	ncRNA		NO
rs3104641	10	58853258	0.694917	0.0066669	6.78159	Intergenic	Intergenic	211061	NR_037490	100500834		NR_037490	ENSG00000264747	MIR3924	-	microRNA 3924	ncRNA	Yes	NO
rs2401699	14	88048965	0.753277	0.044634	6.77808	Intergenic	Intergenic	410650	NM_001201401	2581	Hs.513439	NM_000153	ENSG00000054983	GALC	-	galactosylceramidase	protein-coding	Yes	NO
rs12406729	1	94272119	1.36547	0.0110292	6.76792	intron (NM_001261408, intron 2 of 13)	LTR48|LTR|ERV1	-40269	NR_030621	100126348		NR_030621	ENSG00000211575	MIR760	MIRN760|hsa-mir-760|mir-760	microRNA 760	ncRNA		NO
chr17_45930359_A_C	17	45930359	1.40516	0.0014892	6.76542	intron (NM_199262, intron 1 of 1)	MIR3|SINE|MIR	-1843	NM_001258248	80320	Hs.253603	NM_199262	ENSG00000189120	SP6	EPFN|EPIPROFIN|KLF14	Sp6 transcription factor	protein-coding		NO
rs554400	6	23998157	0.671726	0.000744394	6.76335	Intergenic	Intergenic	-128257	NM_080723	140767	Hs.726270	NM_080723	ENSG00000152954	NRSN1	VMP|p24	neurensin 1	protein-coding		NO
chr22_29013588_C_G	22	29013588	1.46004	0.00465623	6.76318	intron (NM_001145418, intron 2 of 22)	intron (NM_001145418, intron 2 of 22)	62265	NM_001145418	23331	Hs.387856	NM_015281	ENSG00000100154	TTC28	TPRBK	tetratricopeptide repeat domain 28	protein-coding		NO
rs7506794	18	50375592	1.40294	0.00654516	6.75235	intron (NM_005215, intron 2 of 28)	intron (NM_005215, intron 2 of 28)	-387879	NR_130465	100616232		NR_130465	ENSG00000263872	MIR4528	-	microRNA 4528	ncRNA		NO
rs7214041	17	70401476	1.47251	9.1245e-05	6.74351	intron (NR_036488, intron 3 of 3)	intron (NR_036488, intron 3 of 3)	62524	NR_135222	146795	Hs.651743	NR_135222	ENSG00000264026	LINC02003	-	long intergenic non-protein coding RNA 2003	ncRNA		YES
chr22_28504258_A_G	22	28504258	1.4781	0.0052368	6.74331	exon (NM_001145418, exon 7 of 23)	exon (NM_001145418, exon 7 of 23)	-187658	NR_036169	100423034		NR_036169	ENSG00000264073	MIR3199-1	mir-3199-1	microRNA 3199-1	ncRNA		NO
chr17_70400166_C_T	17	70400166	1.45808	0.000142918	6.73243	non-coding (NR_036488, exon 4 of 4)	non-coding (NR_036488, exon 4 of 4)	61214	NR_135222	146795	Hs.651743	NR_135222	ENSG00000264026	LINC02003	-	long intergenic non-protein coding RNA 2003	ncRNA	Yes	YES
rs17045365	2	116770267	0.72853	0.0268281	6.72695	Intergenic	Intergenic	668874	NM_001321913	57628	Hs.580539	NM_020868	ENSG00000175497	DPP10	DPL2|DPPY|DPRP-3|DPRP3	dipeptidyl peptidase like 10	protein-coding	Yes	NO
rs936700	3	176672512	1.42161	0.0112331	6.72304	Intergenic	Intergenic	-137723	NR_110819	101928684	Hs.639352	NR_110819	ENSG00000228308	LINC01209	-	long intergenic non-protein coding RNA 1209	ncRNA		NO
chr15_100283753_A_G	15	100283753	1.33007	0.0260255	6.70872	Intergenic	MLT1B|LTR|ERVL-MaLR	-10104	NM_001284422	145748	Hs.562568	NM_152449	ENSG00000183060	LYSMD4	-	LysM domain containing 4	protein-coding		NO
rs1602983	14	43829964	0.734826	0.0268762	6.70788	Intergenic	L1MC3|LINE|L1	1146535	NM_032135	84075	Hs.307086	NM_032135	ENSG00000189139	FSCB	C14orf155	fibrous sheath CABYR binding protein	protein-coding		NO
rs883740	3	46538515	0.704818	0.0151672	6.70593	promoter-TSS (NM_031440)	promoter-TSS (NM_031440)	-970	NM_031440	83597	Hs.196584	NM_031440	ENSG00000163825	RTP3	LTM1|TMEM7|Z3CXXC3	receptor transporter protein 3	protein-coding	Yes	NO
rs1594496	15	46741036	1.31079	0.0408512	6.70121	Intergenic	L1MEc|LINE|L1	-735367	NM_001198999	80031	Hs.511265	NM_020858	ENSG00000137872	SEMA6D	-	semaphorin 6D	protein-coding	Yes	NO
chr7_14715741_G_T	7	14715741	1.38016	0.0174507	6.69352	intron (NM_145695, intron 11 of 23)	L1MC1|LINE|L1	165334	NM_004080	1607	Hs.567255	NM_004080	ENSG00000136267	DGKB	DAGK2|DGK|DGK-BETA	diacylglycerol kinase beta	protein-coding		NO
rs11848994	14	43472877	0.741849	0.0174375	6.68279	Intergenic	HUERS-P3-int|LTR|ERV1	1396818	NM_001330106	145581	Hs.136893	NM_152447	ENSG00000165379	LRFN5	C14orf146|FIGLER8|SALM5	leucine rich repeat and fibronectin type III domain containing 5	protein-coding	Yes	NO
chr22_28654658_A_G	22	28654658	1.46402	0.00418581	6.67374	intron (NM_001145418, intron 5 of 22)	L1M5|LINE|L1	-201199	NR_106713	102466081		NR_106713	ENSG00000276162	MIR5739	hsa-mir-5739	microRNA 5739	ncRNA		NO
rs78147392	14	69535122	1.56282	0.00112452	6.67198	intron (NM_001284206, intron 7 of 8)	intron (NM_001284206, intron 7 of 8)	84194	NM_001284207	8816	Hs.509780	NM_003861	ENSG00000139990	DCAF5	BCRG2|BCRP2|D14S1461E|WDR22	DDB1 and CUL4 associated factor 5	protein-coding	Yes	NO
rs11849475	14	88050904	0.76235	0.0536894	6.65878	Intergenic	L1PA15|LINE|L1	408711	NM_001201401	2581	Hs.513439	NM_000153	ENSG00000054983	GALC	-	galactosylceramidase	protein-coding		NO
chr12_14770729_A_C	12	14770729	1.42672	0.00303292	6.65793	intron (NM_004963, intron 24 of 26)	MIRb|SINE|MIR	-49938	NM_024829	79887	Hs.131933	NM_024829	ENSG00000121316	PLBD1	-	phospholipase B domain containing 1	protein-coding		NO
chr11_111178145_A_G	11	111178145	1.37547	0.0119138	6.64857	intron (NM_001136105, intron 4 of 4)	intron (NM_001136105, intron 4 of 4)	-2372	NM_001302644	399948	Hs.729225	NM_207429		COLCA1	C11orf92|CASC12|LOH11CR1F	colorectal cancer associated 1	protein-coding	Yes	NO
chr19_13585915_A_G	19	13585915	1.47725	0.00223783	6.63914	intron (NM_001127221, intron 1 of 46)	intron (NM_001127221, intron 1 of 46)	31359	NM_000068	773	Hs.501632	NM_000068	ENSG00000141837	CACNA1A	APCA|BI|CACNL1A4|CAV2.1|EA2|EIEE42|FHM|HPCA|MHP|MHP1|SCA6	calcium voltage-gated channel subunit alpha1 A	protein-coding	Yes	NO
chr3_176672414_A_G	3	176672414	1.32577	0.0275088	6.63542	Intergenic	Intergenic	-137625	NR_110819	101928684	Hs.639352	NR_110819	ENSG00000228308	LINC01209	-	long intergenic non-protein coding RNA 1209	ncRNA	Yes	NO
chr22_28988787_C_T	22	28988787	1.46004	0.00465623	6.6311	intron (NM_001145418, intron 2 of 22)	L2|LINE|L2	87066	NM_001145418	23331	Hs.387856	NM_015281	ENSG00000100154	TTC28	TPRBK	tetratricopeptide repeat domain 28	protein-coding		NO
rs10951991	7	6721661	0.744494	0.0431443	6.60554	Intergenic	Intergenic	24905	NM_006956	7559	Hs.431471	NM_006956	ENSG00000164631	ZNF12	GIOT-3|HZF11|KOX3|ZNF325	zinc finger protein 12	protein-coding		NO
rs10226745	7	75843603	0.734275	0.00564232	6.6045	intron (NM_001291831, intron 1 of 16)	intron (NM_001291831, intron 1 of 16)	12392	NM_001291831	222183	Hs.511025	NM_001039212	ENSG00000177679	SRRM3	-	serine/arginine repetitive matrix 3	protein-coding		NO
rs8107958	19	13586050	1.43404	0.00510328	6.59308	intron (NM_001127221, intron 1 of 46)	MLT1I|LTR|ERVL-MaLR	31224	NM_000068	773	Hs.501632	NM_000068	ENSG00000141837	CACNA1A	APCA|BI|CACNL1A4|CAV2.1|EA2|EIEE42|FHM|HPCA|MHP|MHP1|SCA6	calcium voltage-gated channel subunit alpha1 A	protein-coding		NO
rs6955512	7	98686355	0.673161	0.00317126	6.58456	intron (NM_181349, intron 1 of 17)	intron (NM_181349, intron 1 of 17)	55388	NM_001199847	57154	Hs.189329	NM_020429	ENSG00000198742	SMURF1	-	SMAD specific E3 ubiquitin protein ligase 1	protein-coding		NO
chr22_28985392_C_G	22	28985392	1.46004	0.00465623	6.56833	intron (NM_001145418, intron 2 of 22)	LTR54|LTR|ERV1	90461	NM_001145418	23331	Hs.387856	NM_015281	ENSG00000100154	TTC28	TPRBK	tetratricopeptide repeat domain 28	protein-coding		NO
chr22_28635354_C_T	22	28635354	1.46402	0.00418581	6.56429	intron (NM_001145418, intron 5 of 22)	L1MCb|LINE|L1	-220503	NR_106713	102466081		NR_106713	ENSG00000276162	MIR5739	hsa-mir-5739	microRNA 5739	ncRNA		NO
rs7798061	7	6713936	1.35665	0.0065	6.54493	Intergenic	Intergenic	32630	NM_006956	7559	Hs.431471	NM_006956	ENSG00000164631	ZNF12	GIOT-3|HZF11|KOX3|ZNF325	zinc finger protein 12	protein-coding	Yes	NO
rs8503	9	132902219	1.51047	0.000354619	6.52633	TTS (NR_135124)	TTS (NR_135124)	4279	NR_135124	401554	Hs.522437	NR_135124	ENSG00000196979	LOC401554	-	uncharacterized LOC401554	ncRNA	Yes	NO
rs1858546	11	29361650	0.722516	0.00142164	6.50012	Intergenic	Intergenic	642290	NR_132652	106456574	Hs.128812	NR_132652	ENSG00000261340	LINC01616	n341006	long intergenic non-protein coding RNA 1616	ncRNA		NO
rs61981650	14	69588313	1.49088	0.00332402	6.49186	intron (NM_001284206, intron 2 of 8)	L2c|LINE|L2	31003	NM_001284207	8816	Hs.509780	NM_003861	ENSG00000139990	DCAF5	BCRG2|BCRP2|D14S1461E|WDR22	DDB1 and CUL4 associated factor 5	protein-coding		NO
rs1944928	11	111290086	0.737916	0.0166697	6.4863	Intergenic	Intergenic	-1175	NR_046085	100132078	Hs.672662	NR_046085	ENSG00000255428	LOC100132078	-	uncharacterized LOC100132078	ncRNA		NO
rs12415110	10	37096338	1.51682	6.87762e-05	6.48445	Intergenic	Intergenic	-318447	NM_052997	91074	Hs.373787	NM_052997	ENSG00000148513	ANKRD30A	NY-BR-1	ankyrin repeat domain 30A	protein-coding		NO
rs2439332	8	73588474	1.34655	0.00379356	6.47653	intron (NM_004770, intron 2 of 2)	intron (NM_004770, intron 2 of 2)	-55806	NR_110656	101926908	Hs.680588	NR_110656	ENSG00000253726	LOC101926908	-	uncharacterized LOC101926908	ncRNA		NO
chr22_29004821_A_G	22	29004821	1.45207	0.00522557	6.46577	intron (NM_001145418, intron 2 of 22)	L1M4|LINE|L1	71032	NM_001145418	23331	Hs.387856	NM_015281	ENSG00000100154	TTC28	TPRBK	tetratricopeptide repeat domain 28	protein-coding	Yes	NO
chr22_28943477_C_T	22	28943477	1.46046	0.00466598	6.46576	intron (NM_001145418, intron 2 of 22)	intron (NM_001145418, intron 2 of 22)	87620	NR_106713	102466081		NR_106713	ENSG00000276162	MIR5739	hsa-mir-5739	microRNA 5739	ncRNA		NO
rs77059016	10	21791833	0.621295	0.000281894	6.45998	Intergenic	Intergenic	-5620	NM_001010911	399726	Hs.315568	NM_001010911	ENSG00000204682	CASC10	C10orf114|bA418C1.3	cancer susceptibility candidate 10	protein-coding	Yes	NO
rs12402858	1	87845112	1.37275	5.90705e-05	6.43031	Intergenic	L1MEe|LINE|L1	-7774	NR_038324	100505768	Hs.125247	NR_038324	ENSG00000227290	LINC01364	-	long intergenic non-protein coding RNA 1364	ncRNA	Yes	NO
chr22_28629526_C_T	22	28629526	1.46345	0.00435538	6.41441	intron (NM_001145418, intron 5 of 22)	intron (NM_001145418, intron 5 of 22)	-226331	NR_106713	102466081		NR_106713	ENSG00000276162	MIR5739	hsa-mir-5739	microRNA 5739	ncRNA		NO
rs4131569	12	38876522	0.733189	0.0134446	6.4074	Intergenic	Intergenic	165965	NM_001013620	144245	Hs.259305	NM_001013620	ENSG00000175548	ALG10B	ALG10|KCR1	ALG10B, alpha-1,2-glucosyltransferase	protein-coding		NO
rs62506765	8	31337972	0.741972	0.00145536	6.38943	Intergenic	MER126|DNA|DNA	-159296	NM_013962	3084	Hs.453951	NM_004495	ENSG00000157168	NRG1	ARIA|GGF|GGF2|HGL|HRG|HRG1|HRGA|MST131|MSTP131|NDF|NRG1-IT2|SMDF	neuregulin 1	protein-coding		NO
chr22_28676218_C_T	22	28676218	1.46274	0.0039618	6.38652	intron (NM_001145418, intron 5 of 22)	L1MEf|LINE|L1	-179639	NR_106713	102466081		NR_106713	ENSG00000276162	MIR5739	hsa-mir-5739	microRNA 5739	ncRNA		NO
rs10268808	7	103023537	0.752566	0.0034099	6.3859	intron (NR_135801, intron 12 of 17)	L2c|LINE|L2	35566	NM_001204453	5701	Hs.437366	NM_002803	ENSG00000161057	PSMC2	MSS1|Nbla10058|S7	proteasome 26S subunit, ATPase 2	protein-coding		NO
rs7805578	7	156431731	1.43014	0.00556338	6.38356	non-coding (NR_026865, exon 1 of 1)	non-coding (NR_026865, exon 1 of 1)	1617	NR_026865	129790	Hs.647014	NM_032625	ENSG00000182648	C7orf13	MY040	chromosome 7 open reading frame 13	ncRNA		NO
rs4818886	21	45589727	1.30908	0.0118116	6.36745	Intergenic	L1M3|LINE|L1	36233	NR_135220	8209	Hs.413482	NM_004649	ENSG00000160221	C21orf33	ES1|GT335|HES1|KNPH|KNPI	chromosome 21 open reading frame 33	protein-coding		NO
rs2256351	3	3842084	0.698382	0.00119257	6.36542	intron (NM_020873, intron 1 of 1)	CpG	969	NM_001324189	57633	Hs.163244	NM_020873	ENSG00000175928	LRRN1	FIGLER3|NLRR-1	leucine rich repeat neuronal 1	protein-coding	Yes	NO
rs6037397	20	2755060	0.664059	0.00446402	6.35016	Intergenic	Intergenic	26232	NM_019609	56265	Hs.659346	NM_019609	ENSG00000088882	CPXM1	CPX1|CPXM	carboxypeptidase X, M14 family member 1	protein-coding	Yes	NO
rs2246547	8	73582267	1.33534	0.00399454	6.34477	intron (NM_004770, intron 2 of 2)	MIR3|SINE|MIR	-62013	NR_110656	101926908	Hs.680588	NR_110656	ENSG00000253726	LOC101926908	-	uncharacterized LOC101926908	ncRNA		NO
rs13048791	21	45421406	1.3597	0.00319051	6.34241	Intergenic	Intergenic	-10800	NM_003274	7109	Hs.126221	NM_003274	ENSG00000160218	TRAPPC10	EHOC-1|EHOC1|GT334|TMEM1|TRS130|TRS30	trafficking protein particle complex 10	protein-coding	Yes	NO
chr22_28504183_A_G	22	28504183	1.46374	0.00629423	6.3396	exon (NM_001145418, exon 7 of 23)	exon (NM_001145418, exon 7 of 23)	-187583	NR_036169	100423034		NR_036169	ENSG00000264073	MIR3199-1	mir-3199-1	microRNA 3199-1	ncRNA		NO
chr2_36346005_C_T	2	36346005	0.719369	0.0129926	6.33481	Intergenic	L4|LINE|RTE	236708	NR_037631	100288911	Hs.432924	NR_037631		LOC100288911	-	uncharacterized LOC100288911	ncRNA	Yes	NO
rs16888366	6	23966998	0.677378	0.0044992	6.32837	Intergenic	Intergenic	-159416	NM_080723	140767	Hs.726270	NM_080723	ENSG00000152954	NRSN1	VMP|p24	neurensin 1	protein-coding	Yes	NO
rs34871003	18	30842257	1.80429	2.58663e-06	6.31163	intron (NM_198995, intron 14 of 21)	intron (NM_198995, intron 14 of 21)	177788	NM_001308126	374864	Hs.115461	NM_198995	ENSG00000166960	CCDC178	C18orf34	coiled-coil domain containing 178	protein-coding	Yes	NO
chr22_28669837_A_G	22	28669837	1.46274	0.0039618	6.30872	intron (NM_001145418, intron 5 of 22)	L1MEg|LINE|L1	-186020	NR_106713	102466081		NR_106713	ENSG00000276162	MIR5739	hsa-mir-5739	microRNA 5739	ncRNA		NO
chr12_103558235_A_G	12	103558235	1.64257	0.000578959	6.29451	intron (NR_126333, intron 5 of 6)	intron (NR_126333, intron 5 of 6)	12615	NR_126333	101929058	Hs.171310	NR_126333	ENSG00000257860	LOC101929058	-	uncharacterized LOC101929058	ncRNA	Yes	NO
2543	4	163606031	0.717254	0.0113332	6.28265	Intergenic	Intergenic	408749	NR_039659	100616234		NR_039659	ENSG00000283468	MIR4454	-	microRNA 4454	ncRNA	Yes	NO
chr6_76528438_C_T	6	76528438	1.3539	0.0191677	6.28139	intron (NM_004999, intron 2 of 34)	intron (NM_004999, intron 2 of 34)	69529	NM_004999	4646	Hs.149387	NM_004999	ENSG00000196586	MYO6	DFNA22|DFNB37	myosin VI	protein-coding		NO
chr15_63119797_A_C	15	63119797	1.34707	0.0396527	6.28021	intron (NM_015059, intron 51 of 55)	intron (NM_015059, intron 51 of 55)	3641	NR_029709	406965		NR_029709	ENSG00000211137	MIR190A	MIR190|MIRN190|hsa-mir-190a|miR-190|mir-190a	microRNA 190a	ncRNA	Yes	NO
rs1991687	7	14569676	1.44118	0.00146171	6.27212	intron (NM_145695, intron 19 of 23)	intron (NM_145695, intron 19 of 23)	311399	NM_004080	1607	Hs.567255	NM_004080	ENSG00000136267	DGKB	DAGK2|DGK|DGK-BETA	diacylglycerol kinase beta	protein-coding		NO
rs3735189	7	156431554	1.30413	0.0595959	6.26997	non-coding (NR_026865, exon 1 of 1)	non-coding (NR_026865, exon 1 of 1)	1794	NR_026865	129790	Hs.647014	NM_032625	ENSG00000182648	C7orf13	MY040	chromosome 7 open reading frame 13	ncRNA	Yes	NO
rs8509	7	75616577	0.735858	0.00757885	6.26163	TTS (NM_000941)	TTS (NM_000941)	7415	NM_031925	83862	Hs.488835	NM_031925	ENSG00000189077	TMEM120A	NET29|TMPIT	transmembrane protein 120A	protein-coding		NO
chr22_28779677_C_T	22	28779677	1.46225	0.00419738	6.25507	intron (NM_001145418, intron 2 of 22)	L2a|LINE|L2	-76180	NR_106713	102466081		NR_106713	ENSG00000276162	MIR5739	hsa-mir-5739	microRNA 5739	ncRNA		NO
rs4938584	11	111295615	0.749668	0.0269184	6.25491	Intergenic	AluSx1|SINE|Alu	-6704	NR_046085	100132078	Hs.672662	NR_046085	ENSG00000255428	LOC100132078	-	uncharacterized LOC100132078	ncRNA		NO
rs62247368	3	3842164	1.46103	0.00121741	6.25266	intron (NM_020873, intron 1 of 1)	CpG	1049	NM_001324189	57633	Hs.163244	NM_020873	ENSG00000175928	LRRN1	FIGLER3|NLRR-1	leucine rich repeat neuronal 1	protein-coding		NO
rs2245973	8	73586681	1.32726	0.0047761	6.23764	intron (NM_004770, intron 2 of 2)	intron (NM_004770, intron 2 of 2)	-57599	NR_110656	101926908	Hs.680588	NR_110656	ENSG00000253726	LOC101926908	-	uncharacterized LOC101926908	ncRNA		NO
chr5_98362427_A_G	5	98362427	1.35661	0.0276365	6.23494	Intergenic	Intergenic	97589	NR_036530	100289230	Hs.552095	NR_036530		LOC100289230	-	uncharacterized LOC100289230	ncRNA		NO
chr8_31267653_A_C	8	31267653	0.739511	0.00775985	6.22874	Intergenic	L2a|LINE|L2	-229615	NM_013962	3084	Hs.453951	NM_004495	ENSG00000157168	NRG1	ARIA|GGF|GGF2|HGL|HRG|HRG1|HRGA|MST131|MSTP131|NDF|NRG1-IT2|SMDF	neuregulin 1	protein-coding	Yes	NO
chr22_28912360_A_G	22	28912360	1.46004	0.00465623	6.22552	intron (NM_001145418, intron 2 of 22)	intron (NM_001145418, intron 2 of 22)	56503	NR_106713	102466081		NR_106713	ENSG00000276162	MIR5739	hsa-mir-5739	microRNA 5739	ncRNA		NO
rs4245186	11	111296759	0.753282	0.0293913	6.21895	Intergenic	AluJb|SINE|Alu	-7848	NR_046085	100132078	Hs.672662	NR_046085	ENSG00000255428	LOC100132078	-	uncharacterized LOC100132078	ncRNA		NO
chr5_98304671_G_T	5	98304671	1.30027	0.0556503	6.21736	Intergenic	MIR|SINE|MIR	39833	NR_036530	100289230	Hs.552095	NR_036530		LOC100289230	-	uncharacterized LOC100289230	ncRNA	Yes	NO
rs6980502	8	30694153	1.39393	0.0112781	6.21382	intron (NM_031271, intron 3 of 3)	intron (NM_031271, intron 3 of 3)	12380	NM_031271	56154	Hs.458316	NM_031271	ENSG00000133863	TEX15	CT42	testis expressed 15, meiosis and synapsis associated	protein-coding		NO
rs16877392	8	30687895	1.38813	0.0124586	6.2119	Intergenic	L2a|LINE|L2	-17543	NM_001009552	5516	Hs.491440	NM_004156	ENSG00000104695	PPP2CB	PP2Abeta|PP2CB	protein phosphatase 2 catalytic subunit beta	protein-coding	Yes	NO
rs34501967	2	174869889	1.69266	7.25653e-05	6.19792	Intergenic	Intergenic	-20119	NR_136175	100128905	Hs.456944	NR_136175	ENSG00000260868	LINC01960	-	long intergenic non-protein coding RNA 1960	ncRNA	Yes	NO
chr22_28811215_A_T	22	28811215	1.46167	0.00395772	6.19644	intron (NM_001145418, intron 2 of 22)	intron (NM_001145418, intron 2 of 22)	-44642	NR_106713	102466081		NR_106713	ENSG00000276162	MIR5739	hsa-mir-5739	microRNA 5739	ncRNA		NO
rs7485262	12	38801746	1.38503	0.00349332	6.18935	Intergenic	Tigger2a|DNA|TcMar-Tigger	91189	NM_001013620	144245	Hs.259305	NM_001013620	ENSG00000175548	ALG10B	ALG10|KCR1	ALG10B, alpha-1,2-glucosyltransferase	protein-coding	Yes	NO
rs12281721	11	111364776	1.31284	0.0427045	6.13588	intron (NM_017589, intron 5 of 5)	intron (NM_017589, intron 5 of 5)	18303	NM_017589	54766	Hs.128180	NM_017589	ENSG00000137707	BTG4	APRO3|PC3B	BTG anti-proliferation factor 4	protein-coding		NO
rs7307310	12	40745181	0.736383	0.00161017	6.1225	intron (NM_198578, intron 43 of 50)	intron (NM_198578, intron 43 of 50)	-42015	NM_173600	283463	Hs.632712	NM_173600		MUC19	MUC-19	mucin 19, oligomeric	protein-coding		NO
chr22_29058409_C_T	22	29058409	1.43746	0.000929624	6.10964	intron (NM_001145418, intron 1 of 22)	MIR|SINE|MIR	17444	NM_001145418	23331	Hs.387856	NM_015281	ENSG00000100154	TTC28	TPRBK	tetratricopeptide repeat domain 28	protein-coding		NO
chr11_60239772_A_C	11	60239772	1.3096	0.0232644	6.09013	Intergenic	MER5B|DNA|hAT-Charlie	16490	NM_021950	931	Hs.712553	NM_021950	ENSG00000156738	MS4A1	B1|Bp35|CD20|CVID5|LEU-16|MS4A2|S7	membrane spanning 4-domains A1	protein-coding		NO
chr16_69316990_A_G	16	69316990	0.658132	0.000256495	6.0896	intron (NM_006750, intron 4 of 6)	AluJb|SINE|Alu	-28297	NM_013245	27183	Hs.128420	NM_013245	ENSG00000132612	VPS4A	SKD1|SKD1A|SKD2|VPS4|VPS4-1	vacuolar protein sorting 4 homolog A	protein-coding	Yes	NO
chr22_29045930_C_T	22	29045930	1.43746	0.000929624	6.08788	intron (NM_001145418, intron 1 of 22)	intron (NM_001145418, intron 1 of 22)	29923	NM_001145418	23331	Hs.387856	NM_015281	ENSG00000100154	TTC28	TPRBK	tetratricopeptide repeat domain 28	protein-coding		NO
rs12195334	6	119407563	1.31457	0.0256258	6.084	intron (NM_001100411, intron 1 of 16)	L2c|LINE|L2	-7751	NM_024581	79632	Hs.443789	NM_024581	ENSG00000111879	FAM184A	C6orf60	family with sequence similarity 184 member A	protein-coding		NO
chr22_29015590_G_T	22	29015590	1.44163	0.000851878	6.08392	intron (NM_001145418, intron 2 of 22)	HSMAR2|DNA|TcMar-Mariner	60263	NM_001145418	23331	Hs.387856	NM_015281	ENSG00000100154	TTC28	TPRBK	tetratricopeptide repeat domain 28	protein-coding		NO
rs2588359	3	3843936	0.74007	0.0196149	6.08188	intron (NM_001324188, intron 2 of 2)	intron (NM_001324188, intron 2 of 2)	2821	NM_001324189	57633	Hs.163244	NM_020873	ENSG00000175928	LRRN1	FIGLER3|NLRR-1	leucine rich repeat neuronal 1	protein-coding	Yes	NO
rs11610373	12	115828604	1.54278	0.00179921	6.06967	Intergenic	L1MA9|LINE|L1	-706635	NM_005996	6926	Hs.744016	NM_005996	ENSG00000135111	TBX3	TBX3-ISO|UMS|XHL	T-box 3	protein-coding	Yes	NO
rs17148944	7	75601867	0.767881	0.0170564	6.0671	intron (NM_000941, intron 3 of 15)	intron (NM_000941, intron 3 of 15)	22125	NM_031925	83862	Hs.488835	NM_031925	ENSG00000189077	TMEM120A	NET29|TMPIT	transmembrane protein 120A	protein-coding	Yes	NO
rs16888572	5	21718946	1.45416	5.11277e-05	6.06526	Intergenic	Intergenic	-165617	NR_132787	106635539		NR_132787		SNORA105A	-	small nucleolar RNA, H/ACA box 105A	snoRNA	Yes	NO
chr9_111147697_C_INDEL	9	111147696	0.695239	0.00169372	6.0607	Intergenic	Intergenic	470579	NM_006686	10880	Hs.534390	NM_006686	ENSG00000148156	ACTL7B	Tact1	actin like 7B	protein-coding		NO
rs16825929	2	146776699	0.733695	0.00337782	6.03641	Intergenic	Intergenic	-567926	NR_026904	728773	Hs.334462	NR_026904		PABPC1P2	PABP2|PABP4|PABPCP2|PABPCP4	poly(A) binding protein cytoplasmic 1 pseudogene 2	pseudo		NO
chr22_29108556_A_T	22	29108556	1.4368	0.00653356	6.03152	intron (NM_007194, intron 5 of 14)	intron (NM_007194, intron 5 of 14)	29266	NM_001257387	11200	Hs.291363	NM_007194	ENSG00000183765	CHEK2	CDS1|CHK2|HuCds1|LFS2|PP1425|RAD53|hCds1	checkpoint kinase 2	protein-coding		NO
chr22_29040821_C_T	22	29040821	1.43746	0.000929624	6.03103	intron (NM_001145418, intron 1 of 22)	intron (NM_001145418, intron 1 of 22)	35032	NM_001145418	23331	Hs.387856	NM_015281	ENSG00000100154	TTC28	TPRBK	tetratricopeptide repeat domain 28	protein-coding		NO
rs13337397	16	75295639	1.31267	0.00858496	6.03026	intron (NM_001170720, intron 1 of 7)	intron (NM_001170720, intron 1 of 7)	4207	NM_001170720	9564	Hs.479747	NM_014567	ENSG00000050820	BCAR1	CAS|CAS1|CASS1|CRKAS|P130Cas	BCAR1, Cas family scaffolding protein	protein-coding		NO
rs9620804	22	28919200	1.44722	0.00568362	6.02543	intron (NM_001145418, intron 2 of 22)	L1MEg1|LINE|L1	63343	NR_106713	102466081		NR_106713	ENSG00000276162	MIR5739	hsa-mir-5739	microRNA 5739	ncRNA		NO
c3_pos157892782	3	156410088	0.692282	0.0106296	6.0123	intron (NM_001184718, intron 2 of 5)	intron (NM_001184718, intron 2 of 5)	15635	NM_001184718	25976	Hs.744050	NM_015508	ENSG00000163659	TIPARP	ARTD14|PARP7|pART14	TCDD inducible poly(ADP-ribose) polymerase	protein-coding	Yes	NO
rs2247572	8	73633028	1.32095	0.00430598	6.01022	intron (NM_004770, intron 2 of 2)	L2c|LINE|L2	-11252	NR_110656	101926908	Hs.680588	NR_110656	ENSG00000253726	LOC101926908	-	uncharacterized LOC101926908	ncRNA		NO
chr22_29033545_C_T	22	29033545	1.43746	0.000929624	6.00859	intron (NM_001145418, intron 1 of 22)	L1M1|LINE|L1	42308	NM_001145418	23331	Hs.387856	NM_015281	ENSG00000100154	TTC28	TPRBK	tetratricopeptide repeat domain 28	protein-coding		NO
rs75658816	6	36340647	1.67184	0.000229422	6.00302	intron (NM_001207037, intron 4 of 7)	L2a|LINE|L2	14921	NM_001207038	51513	Hs.272398	NM_016135	ENSG00000010030	ETV7	TEL-2|TEL2|TELB	ETS variant 7	protein-coding		NO
kgp7292018	7	118925326	1.39166	0.00848063	5.9965	Intergenic	L2a|LINE|L2	622103	NR_131962	105375475	Hs.566654	NR_131960	ENSG00000225546	LVCAT5	-	liver cancer-associated transcript 5	ncRNA	Yes	NO
chr22_28919034_C_T	22	28919034	1.44722	0.00568362	5.99501	intron (NM_001145418, intron 2 of 22)	L1MB7|LINE|L1	63177	NR_106713	102466081		NR_106713	ENSG00000276162	MIR5739	hsa-mir-5739	microRNA 5739	ncRNA		NO
rs16825854	2	146737198	0.752692	0.00672364	5.99383	Intergenic	Intergenic	-607427	NR_026904	728773	Hs.334462	NR_026904		PABPC1P2	PABP2|PABP4|PABPCP2|PABPCP4	poly(A) binding protein cytoplasmic 1 pseudogene 2	pseudo	Yes	NO
rs17725419	9	2091914	1.4437	0.00524264	5.99047	intron (NM_003070, intron 19 of 33)	intron (NM_003070, intron 19 of 33)	-65766	NM_001289398	6595	Hs.298990	NM_003070	ENSG00000080503	SMARCA2	BAF190|BRM|NCBRS|SNF2|SNF2L2|SNF2LA|SWI2|Sth1p|hBRM|hSNF2a	SWI/SNF related, matrix associated, actin dependent regulator of chromatin, subfamily a, member 2	protein-coding		NO
rs17162549	1	27682530	1.35035	0.0308638	5.97859	exon (NM_001297609, exon 26 of 28)	exon (NM_001297609, exon 26 of 28)	10827	NM_001297609	9064	Hs.194694	NM_004672	ENSG00000142733	MAP3K6	ASK2|MAPKKK6|MEKK6	mitogen-activated protein kinase kinase kinase 6	protein-coding		NO
rs1408071	9	111147187	0.704638	0.0024654	5.97183	Intergenic	Intergenic	471088	NM_006686	10880	Hs.534390	NM_006686	ENSG00000148156	ACTL7B	Tact1	actin like 7B	protein-coding	Yes	NO
chr12_38932315_C_T	12	38932315	0.737214	0.0156342	5.97097	Intergenic	L2a|LINE|L2	221758	NM_001013620	144245	Hs.259305	NM_001013620	ENSG00000175548	ALG10B	ALG10|KCR1	ALG10B, alpha-1,2-glucosyltransferase	protein-coding		NO
rs10078448	5	170880809	1.36841	0.00249048	5.96754	intron (NM_003862, intron 4 of 4)	intron (NM_003862, intron 4 of 4)	34142	NM_003862	8817	Hs.87191	NM_003862	ENSG00000156427	FGF18	FGF-18|ZFGF5	fibroblast growth factor 18	protein-coding	Yes	NO
chr22_29022172_C_T	22	29022172	1.43746	0.000929624	5.96636	intron (NM_001145418, intron 2 of 22)	intron (NM_001145418, intron 2 of 22)	53681	NM_001145418	23331	Hs.387856	NM_015281	ENSG00000100154	TTC28	TPRBK	tetratricopeptide repeat domain 28	protein-coding		NO
rs10502141	11	111221554	1.31622	0.0177086	5.95804	Intergenic	Intergenic	3072	NR_039712	100616330		NR_039712	ENSG00000264032	MIR4491	mir-4491	microRNA 4491	ncRNA		NO
rs4768231	12	40737183	0.729876	0.000426765	5.95284	intron (NM_198578, intron 41 of 50)	intron (NM_198578, intron 41 of 50)	-50013	NM_173600	283463	Hs.632712	NM_173600		MUC19	MUC-19	mucin 19, oligomeric	protein-coding		NO
chr22_28620584_A_G	22	28620584	1.4551	0.00540538	5.94659	intron (NM_001145418, intron 5 of 22)	intron (NM_001145418, intron 5 of 22)	-235273	NR_106713	102466081		NR_106713	ENSG00000276162	MIR5739	hsa-mir-5739	microRNA 5739	ncRNA		NO
chr12_40732123_C_T	12	40732123	0.729876	0.000426765	5.94625	intron (NM_198578, intron 40 of 50)	L2c|LINE|L2	-55073	NM_173600	283463	Hs.632712	NM_173600		MUC19	MUC-19	mucin 19, oligomeric	protein-coding	Yes	NO
rs17507066	22	29092720	1.42696	0.00763288	5.94615	intron (NM_145862, intron 9 of 13)	intron (NM_145862, intron 9 of 13)	-16867	NM_001145418	23331	Hs.387856	NM_015281	ENSG00000100154	TTC28	TPRBK	tetratricopeptide repeat domain 28	protein-coding		NO
exm193663	2	54035508	0.729961	0.0129289	5.9387	exon (NM_015701, exon 9 of 14)	exon (NM_015701, exon 9 of 14)	-21362	NM_016115	51130	Hs.40763	NM_016115	ENSG00000115239	ASB3	ASB-3	ankyrin repeat and SOCS box containing 3	protein-coding		NO
chr12_14825003_C_T	12	14825003	1.40805	0.00198775	5.92514	intron (NM_004963, intron 9 of 26)	intron (NM_004963, intron 9 of 26)	24516	NM_004963	2984	Hs.524278	NM_004963	ENSG00000070019	GUCY2C	DIAR6|GC-C|GUC2C|MECIL|MUCIL|STAR	guanylate cyclase 2C	protein-coding		NO
chr22_28841839_C_T	22	28841839	1.44901	0.00525174	5.91355	intron (NM_001145418, intron 2 of 22)	L2a|LINE|L2	-14018	NR_106713	102466081		NR_106713	ENSG00000276162	MIR5739	hsa-mir-5739	microRNA 5739	ncRNA		NO
rs10258429	7	55238087	1.59816	0.00059325	5.91043	exon (NM_201284, exon 16 of 16)	exon (NM_201284, exon 16 of 16)	18555	NR_047551	100507500	Hs.720489	NR_047551	ENSG00000224057	EGFR-AS1	-	EGFR antisense RNA 1	ncRNA	Yes	NO
chr17_69124724_C_T	17	69124724	0.697734	6.32824e-05	5.8953	intron (NR_104152, intron 3 of 3)	intron (NR_104152, intron 3 of 3)	73596	NR_104152	101928165	Hs.407613	NR_104152	ENSG00000260785	CASC17	LINC00600	cancer susceptibility candidate 17 (non-protein coding)	ncRNA		NO
chr22_28952823_A_G	22	28952823	1.44285	0.00588681	5.89509	intron (NM_001145418, intron 2 of 22)	MLT1F|LTR|ERVL-MaLR	96966	NR_106713	102466081		NR_106713	ENSG00000276162	MIR5739	hsa-mir-5739	microRNA 5739	ncRNA		NO
chr22_28898127_A_G	22	28898127	1.44722	0.00568362	5.89022	intron (NM_001145418, intron 2 of 22)	intron (NM_001145418, intron 2 of 22)	42270	NR_106713	102466081		NR_106713	ENSG00000276162	MIR5739	hsa-mir-5739	microRNA 5739	ncRNA		NO
chr22_29016057_C_T	22	29016057	1.43746	0.000929624	5.88847	intron (NM_001145418, intron 2 of 22)	HSMAR2|DNA|TcMar-Mariner	59796	NM_001145418	23331	Hs.387856	NM_015281	ENSG00000100154	TTC28	TPRBK	tetratricopeptide repeat domain 28	protein-coding		NO
rs3217986	9	22005330	0.72488	0.0213458	5.88237	3' UTR (NM_078487, exon 2 of 2)	3' UTR (NM_078487, exon 2 of 2)	3982	NM_078487	1030	Hs.72901	NM_004936	ENSG00000147883	CDKN2B	CDK4I|INK4B|MTS2|P15|TP15|p15INK4b	cyclin dependent kinase inhibitor 2B	protein-coding		NO
rs16942883	16	67387817	0.716742	0.0222116	5.87954	intron (NM_018296, intron 5 of 13)	L2|LINE|L2	6559	NM_001161575	55282	Hs.125139	NM_018296	ENSG00000159708	LRRC36	RORBP70|XLHSRF2	leucine rich repeat containing 36	protein-coding	Yes	NO
chr22_28636993_A_G	22	28636993	1.44963	0.00521057	5.87704	intron (NM_001145418, intron 5 of 22)	L1MC4|LINE|L1	-218864	NR_106713	102466081		NR_106713	ENSG00000276162	MIR5739	hsa-mir-5739	microRNA 5739	ncRNA		NO
rs12618833	2	53864413	0.74995	0.0216244	5.87609	Intergenic	L1MA4|LINE|L1	-130507	NM_001346127	494143	Hs.585944	NM_001008708	ENSG00000143942	CHAC2	-	ChaC cation transport regulator homolog 2	protein-coding	Yes	NO
rs12379721	9	21536423	0.730197	0.0238692	5.87436	intron (NR_027054, intron 1 of 3)	intron (NR_027054, intron 1 of 3)	23274	NR_027054	554202	Hs.458096	NR_027054		MIR31HG	hsa-lnc-31	MIR31 host gene	ncRNA		NO
rs12277056	11	111318418	1.35674	0.0212355	5.86936	Intergenic	Intergenic	-29507	NR_046085	100132078	Hs.672662	NR_046085	ENSG00000255428	LOC100132078	-	uncharacterized LOC100132078	ncRNA		NO
rs6774189	3	46592530	0.724585	0.0188139	5.86854	intron (NM_024512, intron 2 of 8)	Tigger13a|DNA|TcMar-Tigger	-6358	NR_073385	83598	Hs.570630	NR_073385	ENSG00000268324	LRRC2-AS1	LUZP3|LUZP3P|LUZPP1	LRRC2 antisense RNA 1	ncRNA		NO
chr17_69150505_C_T	17	69150505	0.692758	0.00219081	5.8652	intron (NR_104152, intron 2 of 3)	intron (NR_104152, intron 2 of 3)	47815	NR_104152	101928165	Hs.407613	NR_104152	ENSG00000260785	CASC17	LINC00600	cancer susceptibility candidate 17 (non-protein coding)	ncRNA		NO
rs12565987	1	205627886	1.45432	0.000405923	5.8569	3' UTR (NM_033102, exon 5 of 5)	3' UTR (NM_033102, exon 5 of 5)	21744	NM_033102	85414	Hs.278695	NM_033102	ENSG00000158715	SLC45A3	IPCA-2|IPCA-6|IPCA-8|IPCA6|PCANAP2|PCANAP6|PCANAP8|PRST	solute carrier family 45 member 3	protein-coding		NO
c3_pos158180281	3	156697587	0.728788	0.0332235	5.84803	intron (NM_001004316, intron 7 of 12)	intron (NM_001004316, intron 7 of 12)	-102043	NR_135546	105374177	Hs.634263	NR_135546	ENSG00000241544	LINC02029	-	long intergenic non-protein coding RNA 2029	ncRNA		NO
rs17651211	7	14490193	1.38381	0.00526825	5.84266	intron (NM_145695, intron 20 of 23)	intron (NM_145695, intron 20 of 23)	390882	NM_004080	1607	Hs.567255	NM_004080	ENSG00000136267	DGKB	DAGK2|DGK|DGK-BETA	diacylglycerol kinase beta	protein-coding	Yes	NO
chr17_69121396_A_G	17	69121396	0.704716	8.42241e-05	5.84264	intron (NR_104152, intron 3 of 3)	intron (NR_104152, intron 3 of 3)	76924	NR_104152	101928165	Hs.407613	NR_104152	ENSG00000260785	CASC17	LINC00600	cancer susceptibility candidate 17 (non-protein coding)	ncRNA	Yes	NO
rs2228273	20	18296076	1.40586	0.000947142	5.83875	exon (NM_001083330, exon 4 of 4)	exon (NM_001083330, exon 4 of 4)	27149	NM_001283007	7692	Hs.472221	NM_003434	ENSG00000125846	ZNF133	ZNF150|pHZ-13|pHZ-66	zinc finger protein 133	protein-coding	Yes	NO
chr3_175410177_A_G	3	175410177	0.750823	0.0140888	5.83796	intron (NM_207015, intron 11 of 13)	intron (NM_207015, intron 11 of 13)	83944	NR_046714	100874245	Hs.614827	NR_046714		NAALADL2-AS1	-	NAALADL2 antisense RNA 1	ncRNA		NO
rs76673792	9	111148465	0.702138	0.00398198	5.83618	Intergenic	Intergenic	469810	NM_006686	10880	Hs.534390	NM_006686	ENSG00000148156	ACTL7B	Tact1	actin like 7B	protein-coding		NO
chr9_29936198_C_T	9	29936198	0.672774	0.00820994	5.83315	Intergenic	L1PB1|LINE|L1	472254	NR_046204	401497	Hs.680131	NR_046204		LINC01242	-	long intergenic non-protein coding RNA 1242	ncRNA	Yes	NO
chr2_121740505_C_T	2	121740505	1.53831	0.00325803	5.83008	intron (NM_005270, intron 10 of 12)	intron (NM_005270, intron 10 of 12)	185638	NM_005270	2736	Hs.111867	NM_005270	ENSG00000074047	GLI2	CJS|HPE9|PHS2|THP1|THP2	GLI family zinc finger 2	protein-coding	Yes	NO
chr14_79797240_A_G	14	79797240	1.3596	0.00960816	5.81748	intron (NM_001105250, intron 1 of 6)	intron (NM_001105250, intron 1 of 6)	51558	NM_138970	9369	Hs.368307	NM_004796	ENSG00000021645	NRXN3	C14orf60	neurexin 3	protein-coding		NO
rs12447007	16	18256483	1.33814	0.0390568	5.81425	Intergenic	Intergenic	170036	NM_001282507	101059938	Hs.634612	NM_001282507	ENSG00000214967	NPIPA7	-	nuclear pore complex interacting protein family member A7	protein-coding	Yes	NO
chr1_158624528_G_T	1	158624528	1.20284	0.200891	5.79671	exon (NM_003126, exon 21 of 52)	exon (NM_003126, exon 21 of 52)	31978	NM_003126	6708	Hs.119825	NM_003126	ENSG00000163554	SPTA1	EL2|HPP|HS3|SPH3|SPTA	spectrin alpha, erythrocytic 1	protein-coding		NO
chr14_93409208_C_T	14	93409208	1.39578	0.0232306	5.79459	intron (NM_001142593, intron 10 of 10)	intron (NM_001142593, intron 10 of 10)	19763	NM_001301690	1113	Hs.150793	NM_001275	ENSG00000100604	CHGA	CGA	chromogranin A	protein-coding	Yes	NO
rs1959834	14	53980388	0.720157	0.00393902	5.79166	Intergenic	Intergenic	360316	NR_110062	101927620		NR_110062	ENSG00000258731	LOC101927620	-	uncharacterized LOC101927620	ncRNA		NO
rs11686823	2	1383361	0.729036	0.0296973	5.78101	Intergenic	Intergenic	-33872	NM_001206744	7173	Hs.467554	NM_000547	ENSG00000115705	TPO	MSA|TDH2A|TPX	thyroid peroxidase	protein-coding	Yes	NO
rs4741641	9	2072356	1.41634	0.00426095	5.7778	intron (NM_003070, intron 10 of 33)	intron (NM_003070, intron 10 of 33)	50411	NM_001289396	6595	Hs.298990	NM_003070	ENSG00000080503	SMARCA2	BAF190|BRM|NCBRS|SNF2|SNF2L2|SNF2LA|SWI2|Sth1p|hBRM|hSNF2a	SWI/SNF related, matrix associated, actin dependent regulator of chromatin, subfamily a, member 2	protein-coding	Yes	NO
rs6429491	1	244750094	0.74722	0.0302889	5.7748	intron (NM_173807, intron 13 of 20)	intron (NM_173807, intron 13 of 20)	-66256	NM_001297746	51029	Hs.498317	NM_016076	ENSG00000121644	DESI2	C1orf121|CGI-146|DESI|DESI1|DeSI-2|FAM152A|PNAS-4|PPPDE1	desumoylating isopeptidase 2	protein-coding		NO
chr5_160198426_C_T	5	160198426	0.761467	0.0285031	5.76528	intron (NM_025153, intron 2 of 25)	intron (NM_025153, intron 2 of 25)	80793	NM_025153	23120	Hs.109358	NM_025153	ENSG00000118322	ATP10B	ATPVB	ATPase phospholipid transporting 10B (putative)	protein-coding		NO
rs12517197	5	160197921	0.761467	0.0285031	5.76513	intron (NM_025153, intron 2 of 25)	intron (NM_025153, intron 2 of 25)	81298	NM_025153	23120	Hs.109358	NM_025153	ENSG00000118322	ATP10B	ATPVB	ATPase phospholipid transporting 10B (putative)	protein-coding	Yes	NO
rs7026731	9	21519921	0.731036	0.0223423	5.75863	intron (NR_027054, intron 1 of 3)	intron (NR_027054, intron 1 of 3)	-7737	NR_029505	407035		NR_029505	ENSG00000199177	MIR31	MIRN31|hsa-mir-31|miR-31	microRNA 31	ncRNA	Yes	NO
rs8052655	16	67409180	0.722757	0.0197957	5.75718	exon (NM_001161575, exon 7 of 11)	exon (NM_001161575, exon 7 of 11)	18258	NM_015964	51673	Hs.534458	NM_015964	ENSG00000159713	TPPP3	CGI-38|TPPP/p20|p20|p25gamma	tubulin polymerization promoting protein family member 3	protein-coding		NO
rs79659080	8	2868019	1.41459	0.0137152	5.75526	intron (NM_033225, intron 52 of 69)	intron (NM_033225, intron 52 of 69)	-282028	NR_125426	101927815	Hs.571467	NR_125423	ENSG00000254319	LOC101927815	-	uncharacterized LOC101927815	ncRNA	Yes	NO
chr22_28989246_C_G	22	28989246	1.4343	0.00100558	5.75319	intron (NM_001145418, intron 2 of 22)	intron (NM_001145418, intron 2 of 22)	86607	NM_001145418	23331	Hs.387856	NM_015281	ENSG00000100154	TTC28	TPRBK	tetratricopeptide repeat domain 28	protein-coding		NO
rs7350426	10	57932910	1.31959	0.0314469	5.75272	Intergenic	L1MD2|LINE|L1	188124	NM_007057	11130	Hs.591363	NM_007057	ENSG00000122952	ZWINT	HZwint-1|KNTC2AP|SIP30|ZWINT1	ZW10 interacting kinetochore protein	protein-coding		NO
rs10733945	10	57916382	1.31959	0.0314469	5.75229	Intergenic	Intergenic	204652	NM_007057	11130	Hs.591363	NM_007057	ENSG00000122952	ZWINT	HZwint-1|KNTC2AP|SIP30|ZWINT1	ZW10 interacting kinetochore protein	protein-coding	Yes	NO
chr2_191024234_C_T	2	191024234	0.728026	0.00404983	5.74526	intron (NM_001042520, intron 1 of 1)	intron (NM_001042520, intron 1 of 1)	9262	NM_001042520	84281	Hs.389311	NM_032321	ENSG00000187699	C2orf88	smAKAP	chromosome 2 open reading frame 88	protein-coding	Yes	NO
rs11850783	14	53924495	0.72708	0.00563309	5.74029	Intergenic	Intergenic	304423	NR_110062	101927620		NR_110062	ENSG00000258731	LOC101927620	-	uncharacterized LOC101927620	ncRNA		NO
rs2880958	8	31355172	0.74597	0.000623337	5.73541	Intergenic	LTR50|LTR|ERVL	-142096	NM_013962	3084	Hs.453951	NM_004495	ENSG00000157168	NRG1	ARIA|GGF|GGF2|HGL|HRG|HRG1|HRGA|MST131|MSTP131|NDF|NRG1-IT2|SMDF	neuregulin 1	protein-coding		NO
rs11228641	11	56312630	1.32745	0.0166695	5.73344	Intergenic	L2a|LINE|L2	-1897	NM_001005245	219487	Hs.553632	NM_001005245	ENSG00000255223	OR5M11	OR11-199	olfactory receptor family 5 subfamily M member 11	protein-coding	Yes	NO
rs17317488	8	2880581	1.45943	0.00710132	5.73325	intron (NM_033225, intron 51 of 69)	L3|LINE|CR1	-294590	NR_125426	101927815	Hs.571467	NR_125423	ENSG00000254319	LOC101927815	-	uncharacterized LOC101927815	ncRNA		NO
rs7455060	7	119177845	1.28755	0.05966	5.7311	Intergenic	Intergenic	369584	NR_131962	105375475	Hs.566654	NR_131960	ENSG00000225546	LVCAT5	-	liver cancer-associated transcript 5	ncRNA		NO
rs61820496	1	158541235	1.56972	0.00189709	5.72872	Intergenic	L3|LINE|CR1	-7841	NM_001160325	128366	Hs.723122	NM_001160325	ENSG00000186440	OR6P1	-	olfactory receptor family 6 subfamily P member 1	protein-coding	Yes	NO
chr22_28853698_C_T	22	28853698	1.44378	0.00583278	5.7257	intron (NM_001145418, intron 2 of 22)	L1M4|LINE|L1	-2159	NR_106713	102466081		NR_106713	ENSG00000276162	MIR5739	hsa-mir-5739	microRNA 5739	ncRNA		NO
rs2689220	10	30488590	0.747889	0.0159446	5.72058	Intergenic	Intergenic	-12191	NR_120653	101929279	Hs.559153	NR_120653		LOC101929279	-	uncharacterized LOC101929279	ncRNA		NO
chr3_175370599_C_T	3	175370599	0.759993	0.0231462	5.71829	intron (NM_207015, intron 11 of 13)	intron (NM_207015, intron 11 of 13)	123522	NR_046714	100874245	Hs.614827	NR_046714		NAALADL2-AS1	-	NAALADL2 antisense RNA 1	ncRNA	Yes	NO
rs4987855	18	60793549	1.44558	0.000353143	5.71751	3' UTR (NM_000633, exon 3 of 3)	3' UTR (NM_000633, exon 3 of 3)	193064	NM_000633	596	Hs.150749	NM_000633	ENSG00000171791	BCL2	Bcl-2|PPP1R50	BCL2, apoptosis regulator	protein-coding		NO
rs10880755	12	45572174	0.735299	0.0240846	5.7153	intron (NR_037144, intron 1 of 2)	L1M3d|LINE|L1	9078	NR_001571	6090		NR_001571		RNY5	Y5	RNA, Ro-associated Y5	ncRNA	Yes	NO
rs1391722	12	115833095	1.45465	0.00360201	5.71495	Intergenic	Intergenic	-711126	NM_005996	6926	Hs.744016	NM_005996	ENSG00000135111	TBX3	TBX3-ISO|UMS|XHL	T-box 3	protein-coding		NO
rs1022121	2	36354424	0.770109	0.0375947	5.71374	Intergenic	Intergenic	228289	NR_037631	100288911	Hs.432924	NR_037631		LOC100288911	-	uncharacterized LOC100288911	ncRNA		NO
rs59190436	7	15020528	0.717031	0.0188599	5.71206	Intergenic	HERVL74-int|LTR|ERVL	-139453	NM_145695	1607	Hs.567255	NM_004080	ENSG00000136267	DGKB	DAGK2|DGK|DGK-BETA	diacylglycerol kinase beta	protein-coding	Yes	NO
chr22_28895265_A_C	22	28895265	1.44316	0.00601846	5.71174	intron (NM_001145418, intron 2 of 22)	intron (NM_001145418, intron 2 of 22)	39408	NR_106713	102466081		NR_106713	ENSG00000276162	MIR5739	hsa-mir-5739	microRNA 5739	ncRNA		NO
rs3856250	1	41374443	0.741523	0.0298218	5.70863	Intergenic	Intergenic	-46425	NM_133467	163732	Hs.355820	NM_133467	ENSG00000179862	CITED4	-	Cbp/p300 interacting transactivator with Glu/Asp rich carboxy-terminal domain 4	protein-coding		NO
rs12418301	11	56387773	1.32576	0.0165423	5.70644	Intergenic	Intergenic	-6795	NM_001004740	390168	Hs.553751	NM_001004740	ENSG00000255012	OR5M1	OR11-208|OST050	olfactory receptor family 5 subfamily M member 1	protein-coding		NO
chr7_20640760_A_G	7	20640760	1.34659	0.0343142	5.69923	Intergenic	MER5A|DNA|hAT-Charlie	-14485	NM_001163941	340273	Hs.404102	NM_178559	ENSG00000004846	ABCB5	ABCB5alpha|ABCB5beta|EST422562	ATP binding cassette subfamily B member 5	protein-coding	Yes	NO
chr22_28752741_C_INDEL	22	28752740	1.44532	0.00533478	5.69911	intron (NM_001145418, intron 2 of 22)	MER45C|DNA|hAT-Tip100	-103117	NR_106713	102466081		NR_106713	ENSG00000276162	MIR5739	hsa-mir-5739	microRNA 5739	ncRNA		NO
rs12531403	7	7185752	0.761253	0.0351231	5.69675	Intergenic	LTR54|LTR|ERV1	-36494	NM_020156	56913	Hs.239666	NM_020156	ENSG00000106392	C1GALT1	C1GALT|T-synthase	core 1 synthase, glycoprotein-N-acetylgalactosamine 3-beta-galactosyltransferase 1	protein-coding	Yes	NO
rs60599314	11	113306431	0.72816	0.00435847	5.69561	intron (NM_016574, intron 1 of 6)	intron (NM_016574, intron 1 of 6)	14379	NR_036183	100422855		NR_036183	ENSG00000265140	MIR4301	-	microRNA 4301	ncRNA	Yes	NO
chr16_67418957_A_G	16	67418957	0.732371	0.0328019	5.69388	exon (NM_001161575, exon 11 of 11)	exon (NM_001161575, exon 11 of 11)	8481	NM_015964	51673	Hs.534458	NM_015964	ENSG00000159713	TPPP3	CGI-38|TPPP/p20|p20|p25gamma	tubulin polymerization promoting protein family member 3	protein-coding		NO
rs12574471	11	113316236	0.726341	0.00454519	5.69127	intron (NM_016574, intron 1 of 6)	intron (NM_016574, intron 1 of 6)	4574	NR_036183	100422855		NR_036183	ENSG00000265140	MIR4301	-	microRNA 4301	ncRNA		NO
rs1496502	3	89097831	1.29565	0.0129362	5.6852	Intergenic	Intergenic	-58843	NM_182644	2042	Hs.123642	NM_005233	ENSG00000044524	EPHA3	EK4|ETK|ETK1|HEK|HEK4|TYRO4	EPH receptor A3	protein-coding	Yes	NO
rs7153908	14	53942112	0.730661	0.00621606	5.68313	Intergenic	Intergenic	322040	NR_110062	101927620		NR_110062	ENSG00000258731	LOC101927620	-	uncharacterized LOC101927620	ncRNA		NO
rs10513770	3	179858044	0.739682	0.0367481	5.68279	Intergenic	Intergenic	-103203	NM_001256753	51555	Hs.235331	NM_016559	ENSG00000114757	PEX5L	PEX5R|PEX5RP|PXR2|PXR2B|TRIP8b	peroxisomal biogenesis factor 5 like	protein-coding	Yes	NO
chr5_13839068_C_T	5	13839068	1.31396	0.0487759	5.67937	intron (NM_001369, intron 35 of 78)	intron (NM_001369, intron 35 of 78)	105521	NM_001369	1767	Hs.212360	NM_001369	ENSG00000039139	DNAH5	CILD3|DNAHC5|HL1|KTGNR|PCD	dynein axonemal heavy chain 5	protein-coding		NO
chr5_13839002_A_G	5	13839002	1.31396	0.0487759	5.67932	intron (NM_001369, intron 35 of 78)	MIR3|SINE|MIR	105587	NM_001369	1767	Hs.212360	NM_001369	ENSG00000039139	DNAH5	CILD3|DNAHC5|HL1|KTGNR|PCD	dynein axonemal heavy chain 5	protein-coding	Yes	NO
rs80313636	22	28718744	1.44532	0.00533478	5.67267	intron (NM_001145418, intron 2 of 22)	MLT1D|LTR|ERVL-MaLR	-137113	NR_106713	102466081		NR_106713	ENSG00000276162	MIR5739	hsa-mir-5739	microRNA 5739	ncRNA		NO
rs6452029	5	21907093	0.748316	0.000898394	5.66931	intron (NM_001317227, intron 3 of 11)	intron (NM_001317227, intron 3 of 11)	22530	NR_132788	106635540		NR_132788		SNORA105B	-	small nucleolar RNA, H/ACA box 105B	snoRNA		NO
rs7098998	10	37047826	1.32948	0.011051	5.66732	Intergenic	Intergenic	-366959	NM_052997	91074	Hs.373787	NM_052997	ENSG00000148513	ANKRD30A	NY-BR-1	ankyrin repeat domain 30A	protein-coding	Yes	NO
rs7328271	13	31554346	1.41012	0.00407427	5.64689	Intergenic	Intergenic	47512	NM_152325	122046	Hs.124463	NM_152325	ENSG00000175664	TEX26	C13orf26	testis expressed 26	protein-coding	Yes	NO
rs10024159	4	158602153	1.38845	0.0219222	5.64623	Intergenic	Intergenic	108511	NR_026992	340017	Hs.428275	NR_026992	ENSG00000234111	LOC340017	-	uncharacterized LOC340017	ncRNA		NO
chr3_64254336_A_T	3	64254336	1.46291	0.00857784	5.64545	Intergenic	L2c|LINE|L2	-43205	NM_198859	166336	Hs.148105	NM_198859	ENSG00000163637	PRICKLE2	EPM5	prickle planar cell polarity protein 2	protein-coding	Yes	NO
chr19_54895748_A_G	19	54895748	1.5684	0.000729181	5.64119	Intergenic	Intergenic	-13585	NM_001289026	3903	Hs.572535	NM_002287	ENSG00000167613	LAIR1	CD305|LAIR-1	leukocyte associated immunoglobulin like receptor 1	protein-coding	Yes	NO
chr22_28792887_C_T	22	28792887	1.44324	0.00601205	5.63903	intron (NM_001145418, intron 2 of 22)	intron (NM_001145418, intron 2 of 22)	-62970	NR_106713	102466081		NR_106713	ENSG00000276162	MIR5739	hsa-mir-5739	microRNA 5739	ncRNA		NO
rs4245717	1	205595753	0.728896	0.004041	5.63507	intron (NM_001973, intron 1 of 4)	L1MB8|LINE|L1	6247	NM_001973	2005	Hs.497520	NM_001973	ENSG00000158711	ELK4	SAP1	ELK4, ETS transcription factor	protein-coding	Yes	NO
chr3_156832984_A_G	3	156832984	1.36564	0.013955	5.63464	intron (NR_034007, intron 1 of 3)	intron (NR_034007, intron 1 of 3)	7807	NR_034007	339894	Hs.478050	NR_034007	ENSG00000243629	LINC00880	-	long intergenic non-protein coding RNA 880	ncRNA		NO
rs9625564	22	29160437	1.42212	0.00389589	5.63428	Intergenic	MER68|LTR|ERVL	-8225	NM_001284264	150275	Hs.406460	NM_173510	ENSG00000159873	CCDC117	dJ366L4.1	coiled-coil domain containing 117	protein-coding		NO
chr7_20641038_A_G	7	20641038	1.33811	0.0380694	5.63158	Intergenic	LTR47A|LTR|ERVL	-14207	NM_001163941	340273	Hs.404102	NM_178559	ENSG00000004846	ABCB5	ABCB5alpha|ABCB5beta|EST422562	ATP binding cassette subfamily B member 5	protein-coding		NO
rs161405	10	34295917	0.76101	0.0227616	5.6178	Intergenic	Intergenic	-234309	NR_038932	100505583	Hs.568804	NR_038932	ENSG00000261683	LINC00838	-	long intergenic non-protein coding RNA 838	ncRNA	Yes	NO
chr22_28791864_C_T	22	28791864	1.44324	0.00601205	5.61472	intron (NM_001145418, intron 2 of 22)	intron (NM_001145418, intron 2 of 22)	-63993	NR_106713	102466081		NR_106713	ENSG00000276162	MIR5739	hsa-mir-5739	microRNA 5739	ncRNA		NO
chr10_65056345_A_G	10	65056345	0.622155	0.000169981	5.61437	intron (NM_032776, intron 2 of 25)	MER82|DNA|TcMar-Tigger	-27362	NM_001282948	221037	Hs.413416	NM_004241	ENSG00000171988	JMJD1C	KDM3C|TRIP-8|TRIP8	jumonji domain containing 1C	protein-coding	Yes	NO
chr10_44308718_A_G	10	44308718	1.23958	0.113965	5.61052	Intergenic	Intergenic	-22853	NR_002726	10151	Hs.632956	NR_002726		HNRNPA3P1	D10S102|FBRNP|HNRPA3|HNRPA3P1	heterogeneous nuclear ribonucleoprotein A3 pseudogene 1	pseudo	Yes	NO
chr4_153942717_C_T	4	153942717	1.31398	0.00905028	5.60998	Intergenic	Intergenic	78582	NM_033393	85462	Hs.132629	NM_033393	ENSG00000137460	FHDC1	-	FH2 domain containing 1	protein-coding		NO
rs4074785	9	21981583	0.747464	0.0362115	5.60189	intron (NM_058195, intron 1 of 2)	MIRc|SINE|MIR	-6451	NM_000077	1029	Hs.512599	NM_000077	ENSG00000147889	CDKN2A	ARF|CDK4I|CDKN2|CMM2|INK4|INK4A|MLM|MTS-1|MTS1|P14|P14ARF|P16|P16-INK4A|P16INK4|P16INK4A|P19|P19ARF|TP16	cyclin dependent kinase inhibitor 2A	protein-coding		NO
rs17676919	18	60783729	1.41267	0.000937671	5.60163	Intergenic	Intergenic	202884	NM_000633	596	Hs.150749	NM_000633	ENSG00000171791	BCL2	Bcl-2|PPP1R50	BCL2, apoptosis regulator	protein-coding	Yes	NO
rs10901911	11	50282774	1.31816	0.00508281	5.60076	Intergenic	MIR3|SINE|MIR	-25141	NR_003034	441601	Hs.144683	NR_003034	ENSG00000255042	LOC441601	-	septin 7 pseudogene	pseudo		NO
rs10965068	9	21579827	0.677101	0.00614599	5.59817	Intergenic	Intergenic	-20130	NR_027054	554202	Hs.458096	NR_027054		MIR31HG	hsa-lnc-31	MIR31 host gene	ncRNA		NO
chr15_91531798_C_G	15	91531798	0.73287	0.00506879	5.59165	TTS (NR_051984)	TTS (NR_051984)	6083	NM_001267580	9055	Hs.366401	NM_003981	ENSG00000198901	PRC1	ASE1	protein regulator of cytokinesis 1	protein-coding	Yes	NO
rs10228095	7	154058755	0.789319	0.0470381	5.58639	intron (NM_001936, intron 1 of 25)	intron (NM_001936, intron 1 of 25)	56458	NM_001936	1804	Hs.490684	NM_001936	ENSG00000130226	DPP6	DPL1|DPPX|MRD33|VF2	dipeptidyl peptidase like 6	protein-coding		NO
rs4954223	2	135914653	1.40169	0.000396943	5.57606	intron (NM_012233, intron 19 of 23)	intron (NM_012233, intron 19 of 23)	104818	NM_001172435	22930	Hs.306327	NM_012233	ENSG00000115839	RAB3GAP1	P130|RAB3GAP|RAB3GAP130|WARBM1	RAB3 GTPase activating protein catalytic subunit 1	protein-coding	Yes	NO
rs12002851	9	94601093	0.761916	0.013798	5.574	intron (NM_004560, intron 1 of 8)	intron (NM_004560, intron 1 of 8)	111351	NM_004560	4920	Hs.98255	NM_004560	ENSG00000169071	ROR2	BDB|BDB1|NTRKR2	receptor tyrosine kinase like orphan receptor 2	protein-coding	Yes	NO
rs1390677	11	50070332	1.31816	0.00508281	5.57101	Intergenic	Intergenic	-66261	NM_001005270	283093	Hs.553669	NM_001005270	ENSG00000221954	OR4C12	OR11-259	olfactory receptor family 4 subfamily C member 12	protein-coding	Yes	NO
rs9832544	3	156832895	1.35824	0.0152199	5.56284	intron (NR_034007, intron 1 of 3)	intron (NR_034007, intron 1 of 3)	7896	NR_034007	339894	Hs.478050	NR_034007	ENSG00000243629	LINC00880	-	long intergenic non-protein coding RNA 880	ncRNA	Yes	NO
chr13_113981283_A_G	13	113981283	0.735476	0.021877	5.56209	intron (NM_024719, intron 5 of 7)	L1MB2|LINE|L1	-24705	NR_046541	100874068	Hs.661837	NR_046541		GRTP1-AS1	-	GRTP1 antisense RNA 1	ncRNA		NO
chr2_49170577_A_G	2	49170577	1.28219	0.073557	5.56006	Intergenic	Intergenic	-116165	NR_107011	102465854		NR_107011	ENSG00000212036	MIR548BA	hsa-mir-548ba	microRNA 548ba	ncRNA	Yes	NO
chr13_113939146_A_G	13	113939146	0.820149	0.167713	5.5565	Intergenic	Intergenic	-12323	NM_005561	3916	Hs.494419	NM_005561	ENSG00000185896	LAMP1	CD107a|LAMPA|LGP120	lysosomal associated membrane protein 1	protein-coding	Yes	NO
rs9913623	17	12242902	1.36207	0.00538856	5.54805	Intergenic	L2b|LINE|L2	-210383	NR_034145	284034	Hs.376614	NR_034144	ENSG00000179136	LINC00670	-	long intergenic non-protein coding RNA 670	ncRNA		NO
rs2252	17	12241592	1.35946	0.00584566	5.54625	Intergenic	Intergenic	-211693	NR_034145	284034	Hs.376614	NR_034144	ENSG00000179136	LINC00670	-	long intergenic non-protein coding RNA 670	ncRNA	Yes	NO
rs10794500	1	27557756	0.777154	0.0293382	5.54599	Intergenic	(TATG)n|Simple_repeat|Simple_repeat	-3251	NM_015023	23038	Hs.469154	NM_015023	ENSG00000142784	WDTC1	ADP|DCAF9	WD and tetratricopeptide repeats 1	protein-coding	Yes	NO
rs4758022	11	7871011	1.31122	0.028195	5.53043	non-coding (NR_027711, exon 1 of 1)	non-coding (NR_027711, exon 1 of 1)	413	NR_027711	26343	Hs.382973	NR_027711		OR5E1P	HSTPCR24|OR5E1|TPCR24	olfactory receptor family 5 subfamily E member 1 pseudogene	pseudo	Yes	NO
chr4_100504566_C_G	4	100504566	0.737858	0.0312295	5.5258	exon (NM_001300785, exon 3 of 18)	exon (NM_001300785, exon 3 of 18)	19331	NM_000253	4547	Hs.195799	NM_000253	ENSG00000138823	MTTP	ABL|MTP	microsomal triglyceride transfer protein	protein-coding	Yes	NO
rs10496995	2	146835932	0.793506	0.0181652	5.52528	Intergenic	Intergenic	-508693	NR_026904	728773	Hs.334462	NR_026904		PABPC1P2	PABP2|PABP4|PABPCP2|PABPCP4	poly(A) binding protein cytoplasmic 1 pseudogene 2	pseudo		NO
kgp6448707	11	49017552	1.32161	0.0154096	5.5251	Intergenic	Tigger7|DNA|TcMar-Tigger	-35600	NM_001206626	283116	Hs.448644	NM_001206626	ENSG00000182053	TRIM49B	-	tripartite motif containing 49B	protein-coding	Yes	NO
chr22_28780451_C_T	22	28780451	1.44025	0.00619136	5.52358	intron (NM_001145418, intron 2 of 22)	L2a|LINE|L2	-75406	NR_106713	102466081		NR_106713	ENSG00000276162	MIR5739	hsa-mir-5739	microRNA 5739	ncRNA		NO
rs349359	8	73503743	1.27646	0.0125089	5.52169	intron (NM_004770, intron 2 of 2)	intron (NM_004770, intron 2 of 2)	54117	NM_004770	9312	Hs.661102	NM_004770	ENSG00000182674	KCNB2	KV2.2	potassium voltage-gated channel subfamily B member 2	protein-coding	Yes	NO
chr14_79703848_A_C	14	79703848	1.30961	0.0329413	5.51741	intron (NM_001330195, intron 15 of 20)	intron (NM_001330195, intron 15 of 20)	37523	NR_135159	105370586		NR_135159	ENSG00000258419	LOC105370586	-	uncharacterized LOC105370586	ncRNA	Yes	NO
chr4_175837394_A_G	4	175837394	1.34713	0.00200067	5.51488	Intergenic	L1MC3|LINE|L1	-2115	NM_001130703	11086	Hs.126838	NM_014269	ENSG00000168594	ADAM29	CT73|svph1	ADAM metallopeptidase domain 29	protein-coding	Yes	NO
rs1203845	7	98449574	1.37872	0.00882914	5.50795	intron (NM_152913, intron 5 of 7)	AluJb|SINE|Alu	18099	NM_001134451	222865	Hs.270753	NM_152913	ENSG00000166448	TMEM130	-	transmembrane protein 130	protein-coding	Yes	NO
rs10902652	1	27558522	0.780756	0.031848	5.50739	Intergenic	AluY|SINE|Alu	-2485	NM_015023	23038	Hs.469154	NM_015023	ENSG00000142784	WDTC1	ADP|DCAF9	WD and tetratricopeptide repeats 1	protein-coding		NO
rs1371112	2	140071800	1.34598	0.0116869	5.5013	Intergenic	Intergenic	416906	NR_033658	647012	Hs.639411	NR_033658		YY1P2	-	YY1 transcription factor pseudogene 2	pseudo	Yes	NO
chr12_49840480_A_G	12	49840480	1.33008	0.0235779	5.49807	intron (NM_001293285, intron 3 of 14)	MLT1E2|LTR|ERVL-MaLR	57523	NR_033267	100335030	Hs.687044	NR_033267		LOC100335030	-	FGFR1 oncogene partner 2 pseudogene	pseudo		NO
chr4_95441565_C_T	4	95441565	0.757265	0.041688	5.49726	intron (NM_001256428, intron 2 of 11)	intron (NM_001256428, intron 2 of 11)	68557	NM_001256427	10611	Hs.480311	NM_006457	ENSG00000163110	PDLIM5	ENH|ENH1|L9|LIM	PDZ and LIM domain 5	protein-coding		NO
chr8_82442148_A_T	8	82442148	1.45166	0.00787577	5.49422	intron (NR_144370, intron 1 of 3)	Charlie4z|DNA|hAT-Charlie	1477	NM_001105281	646486	Hs.586370	NM_001105281	ENSG00000197416	FABP12	-	fatty acid binding protein 12	protein-coding		NO
rs6931919	6	101027440	1.37121	0.0372256	5.48799	intron (NM_006828, intron 36 of 41)	L1PA15|LINE|L1	-115889	NM_005068	6492	Hs.520293	NM_005068	ENSG00000112246	SIM1	bHLHe14	single-minded family bHLH transcription factor 1	protein-coding	Yes	NO
chr2_216898139_A_C	2	216898139	1.42832	0.0090577	5.48591	Intergenic	MIR|SINE|MIR	-19793	NM_018000	55686	Hs.620391	NM_018000	ENSG00000118242	MREG	DSU|WDT2	melanoregulin	protein-coding	Yes	NO
chr22_28773629_C_T	22	28773629	1.43961	0.00590489	5.48576	intron (NM_001145418, intron 2 of 22)	L1MEc|LINE|L1	-82228	NR_106713	102466081		NR_106713	ENSG00000276162	MIR5739	hsa-mir-5739	microRNA 5739	ncRNA		NO
chr22_28718217_A_G	22	28718217	1.43961	0.00590489	5.48031	intron (NM_001145418, intron 2 of 22)	intron (NM_001145418, intron 2 of 22)	-137640	NR_106713	102466081		NR_106713	ENSG00000276162	MIR5739	hsa-mir-5739	microRNA 5739	ncRNA		NO
rs3850200	5	118812648	1.35282	0.011254	5.47612	intron (NM_001199291, intron 7 of 24)	intron (NM_001199291, intron 7 of 24)	24456	NM_001292028	3295	Hs.406861	NM_000414	ENSG00000133835	HSD17B4	DBP|MFE-2|MPF-2|PRLTS1|SDR8C1	hydroxysteroid 17-beta dehydrogenase 4	protein-coding	Yes	NO
rs1056812	11	565840	1.50678	0.00254123	5.47594	non-coding (NR_038262, exon 2 of 2)	non-coding (NR_038262, exon 2 of 2)	2358	NR_029623	406992		NR_029623	ENSG00000199038	MIR210	MIRN210|mir-210	microRNA 210	ncRNA	Yes	YES
chr11_56528362_A_G	11	56528362	1.34623	0.0365521	5.47433	Intergenic	Intergenic	17013	NR_106743	102465135		NR_106743	ENSG00000274770	MIR6128	hsa-mir-6128	microRNA 6128	ncRNA		NO
rs344905	2	140077355	1.33125	0.0145936	5.47365	Intergenic	Intergenic	422461	NR_033658	647012	Hs.639411	NR_033658		YY1P2	-	YY1 transcription factor pseudogene 2	pseudo		NO
chr16_49662912_G_T	16	49662912	0.787668	0.0913923	5.46809	intron (NM_001330533, intron 2 of 5)	intron (NM_001330533, intron 2 of 5)	35230	NM_001330533	23090	Hs.443715	NM_015069	ENSG00000102935	ZNF423	Ebfaz|JBTS19|NPHP14|OAZ|Roaz|ZFP423|Zfp104|hOAZ	zinc finger protein 423	protein-coding	Yes	NO
chr1_48109225_C_T	1	48109225	1.28067	0.026702	5.46752	Intergenic	Intergenic	-206236	NR_126355	102724077	Hs.159718	NR_126355		LINC01389	-	long intergenic non-protein coding RNA 1389	ncRNA	Yes	NO
rs12335859	9	21955460	0.740645	0.0251536	5.4663	Intergenic	MER63C|DNA|hAT-Blackjack	-11678	NR_024274	51198	Hs.721053	NM_016349		CDKN2A-AS1	C9orf53|bA149I2.3	CDKN2A antisense RNA 1 (head to head)	ncRNA		NO
chr4_95410555_A_T	4	95410555	0.758714	0.0556289	5.45876	intron (NM_001256428, intron 2 of 11)	intron (NM_001256428, intron 2 of 11)	37547	NM_001256427	10611	Hs.480311	NM_006457	ENSG00000163110	PDLIM5	ENH|ENH1|L9|LIM	PDZ and LIM domain 5	protein-coding		NO
chr6_76378443_C_T	6	76378443	1.3275	0.0297461	5.45179	intron (NM_015571, intron 10 of 23)	L1M5|LINE|L1	67218	NM_001100409	26054	Hs.485784	NM_015571	ENSG00000112701	SENP6	SSP1|SUSP1	SUMO1/sentrin specific peptidase 6	protein-coding	Yes	NO
rs2579247	12	20232244	0.691726	0.00993898	5.44465	intron (NR_040098, intron 2 of 2)	intron (NR_040098, intron 2 of 2)	64625	NR_040098	100506393	Hs.658356	NR_040098	ENSG00000256287	LOC100506393	-	uncharacterized LOC100506393	ncRNA		NO
rs998188	9	21561968	0.685066	0.00760314	5.44434	Intergenic	Intergenic	-2271	NR_027054	554202	Hs.458096	NR_027054		MIR31HG	hsa-lnc-31	MIR31 host gene	ncRNA		NO
rs9875511	3	69248608	1.28527	0.0809467	5.44202	intron (NM_015123, intron 11 of 22)	intron (NM_015123, intron 11 of 22)	-76862	NM_001304418	56203	Hs.350621	NM_198271	ENSG00000163380	LMOD3	NEM10	leiomodin 3	protein-coding		NO
chr3_69247362_A_G	3	69247362	1.28527	0.0809467	5.44197	intron (NM_015123, intron 12 of 22)	intron (NM_015123, intron 12 of 22)	-75616	NM_001304418	56203	Hs.350621	NM_198271	ENSG00000163380	LMOD3	NEM10	leiomodin 3	protein-coding	Yes	NO
rs6506858	18	76586071	1.41015	0.000493083	5.44005	Intergenic	Intergenic	-154204	NM_171999	27164	Hs.700557	NM_171999	ENSG00000256463	SALL3	ZNF796	spalt like transcription factor 3	protein-coding		NO
chr22_28862768_C_T	22	28862768	1.43681	0.00659017	5.43827	intron (NM_001145418, intron 2 of 22)	intron (NM_001145418, intron 2 of 22)	6911	NR_106713	102466081		NR_106713	ENSG00000276162	MIR5739	hsa-mir-5739	microRNA 5739	ncRNA		NO
chr12_49809456_C_T	12	49809456	1.32542	0.0249474	5.42924	intron (NM_001293285, intron 3 of 14)	MLT1F1-int|LTR|ERVL-MaLR	26499	NR_033267	100335030	Hs.687044	NR_033267		LOC100335030	-	FGFR1 oncogene partner 2 pseudogene	pseudo		NO
chr11_49493736_A_G	11	49493736	1.31029	0.0172625	5.42909	Intergenic	MLT1A1|LTR|ERVL-MaLR	-86344	NR_027044	440040	Hs.655746	NR_027044	ENSG00000205035	LOC440040	-	glutamate metabotropic receptor 5 pseudogene	pseudo		NO
chr4_100639912_A_G	4	100639912	0.766394	0.0576628	5.42553	Intergenic	Intergenic	-98069	NM_014395	27071	Hs.436271	NM_014395	ENSG00000070190	DAPP1	BAM32	dual adaptor of phosphotyrosine and 3-phosphoinositides 1	protein-coding		NO
chr4_95590036_G_T	4	95590036	0.759619	0.0138427	5.42204	TTS (NM_001256427)	TTS (NM_001256427)	88648	NR_121610	100507012	Hs.128612	NR_121610		BMPR1B-AS1	-	BMPR1B antisense RNA 1 (head to head)	ncRNA		NO
rs12967884	18	76591635	1.40792	0.000627058	5.41882	Intergenic	L1M4c|LINE|L1	-148640	NM_171999	27164	Hs.700557	NM_171999	ENSG00000256463	SALL3	ZNF796	spalt like transcription factor 3	protein-coding		NO
chr4_153940203_A_G	4	153940203	1.29448	0.0352581	5.41502	Intergenic	Intergenic	76068	NM_033393	85462	Hs.132629	NM_033393	ENSG00000137460	FHDC1	-	FH2 domain containing 1	protein-coding		NO
rs7983837	13	109303931	0.741811	0.00917589	5.40893	intron (NM_001198950, intron 1 of 34)	intron (NM_001198950, intron 1 of 34)	22360	NM_001198950	23026	Hs.656587	NM_015011	ENSG00000041515	MYO16	MYAP3|MYR8|Myo16b|NYAP3|PPP1R107	myosin XVI	protein-coding		NO
rs1022684	20	18487506	0.762611	0.0113761	5.40562	promoter-TSS (NM_006363)	promoter-TSS (NM_006363)	-682	NM_006363	10483	Hs.369373	NM_006363	ENSG00000101310	SEC23B	CDA-II|CDAII|CDAN2|CWS7|HEMPAS	Sec23 homolog B, coat complex II component	protein-coding		NO
rs882123	9	20289153	1.3182	0.0163887	5.40361	Intergenic	MLT1G1|LTR|ERVL-MaLR	122083	NR_039684	100616229		NR_039684	ENSG00000263790	MIR4473	-	microRNA 4473	ncRNA	Yes	NO
rs11897977	2	1384725	0.793546	0.0517707	5.40292	Intergenic	MSTA|LTR|ERVL-MaLR	-32508	NM_001206744	7173	Hs.467554	NM_000547	ENSG00000115705	TPO	MSA|TDH2A|TPX	thyroid peroxidase	protein-coding		NO
c9_pos21944071	9	21954071	0.752303	0.0351408	5.39879	Intergenic	L1MC3|LINE|L1	-13067	NR_024274	51198	Hs.721053	NM_016349		CDKN2A-AS1	C9orf53|bA149I2.3	CDKN2A antisense RNA 1 (head to head)	ncRNA	Yes	NO
rs586286	10	30468830	0.799146	0.0757003	5.39722	Intergenic	HAL1|LINE|L1	-31951	NR_120653	101929279	Hs.559153	NR_120653		LOC101929279	-	uncharacterized LOC101929279	ncRNA		NO
chr9_21956230_C_T	9	21956230	0.760235	0.037311	5.39227	Intergenic	Intergenic	-10908	NR_024274	51198	Hs.721053	NM_016349		CDKN2A-AS1	C9orf53|bA149I2.3	CDKN2A antisense RNA 1 (head to head)	ncRNA		NO
rs3782131	12	45611034	0.727602	0.025215	5.3863	intron (NM_001025356, intron 1 of 19)	intron (NM_001025356, intron 1 of 19)	-1245	NR_037144	51054	Hs.233495	NM_015899	ENSG00000134297	PLEKHA8P1	PLEKHA9	pleckstrin homology domain containing A8 pseudogene 1	pseudo		NO
rs7442799	5	21896184	0.758318	0.00223349	5.38288	intron (NM_001317227, intron 3 of 11)	intron (NM_001317227, intron 3 of 11)	11621	NR_132788	106635540		NR_132788		SNORA105B	-	small nucleolar RNA, H/ACA box 105B	snoRNA		NO
rs12002478	9	94603970	0.738785	0.00949584	5.37641	intron (NM_004560, intron 1 of 8)	intron (NM_004560, intron 1 of 8)	108474	NM_004560	4920	Hs.98255	NM_004560	ENSG00000169071	ROR2	BDB|BDB1|NTRKR2	receptor tyrosine kinase like orphan receptor 2	protein-coding		NO
rs8189213	11	50566719	1.28124	0.0122245	5.37624	Intergenic	ALR/Alpha|Satellite|centr	198401	NR_024504	646813	Hs.684179	NR_024504		LOC646813	-	DEAH-box helicase 9 pseudogene	pseudo		NO
rs77934893	6	36340164	1.46793	0.00485708	5.37498	intron (NM_001207037, intron 4 of 7)	L2a|LINE|L2	15404	NM_001207038	51513	Hs.272398	NM_016135	ENSG00000010030	ETV7	TEL-2|TEL2|TELB	ETS variant 7	protein-coding	Yes	NO
rs6944332	7	6758018	0.777486	0.0267638	5.37315	Intergenic	Intergenic	-11452	NM_016265	7559	Hs.431471	NM_006956	ENSG00000164631	ZNF12	GIOT-3|HZF11|KOX3|ZNF325	zinc finger protein 12	protein-coding		NO
rs10927267	1	244735858	0.780208	0.0610477	5.373	exon (NM_001242340, exon 8 of 19)	exon (NM_001242340, exon 8 of 19)	-80492	NM_001297746	51029	Hs.498317	NM_016076	ENSG00000121644	DESI2	C1orf121|CGI-146|DESI|DESI1|DeSI-2|FAM152A|PNAS-4|PPPDE1	desumoylating isopeptidase 2	protein-coding		NO
chr22_28858248_C_T	22	28858248	1.43387	0.00678315	5.37034	intron (NM_001145418, intron 2 of 22)	MLT1I|LTR|ERVL-MaLR	2391	NR_106713	102466081		NR_106713	ENSG00000276162	MIR5739	hsa-mir-5739	microRNA 5739	ncRNA		NO
rs2007105	18	76392789	0.623629	0.000231031	5.37011	Intergenic	Intergenic	-347486	NM_171999	27164	Hs.700557	NM_171999	ENSG00000256463	SALL3	ZNF796	spalt like transcription factor 3	protein-coding	Yes	NO
rs17145475	5	118869440	1.31633	0.0338733	5.36061	intron (NM_001199291, intron 23 of 24)	intron (NM_001199291, intron 23 of 24)	81248	NM_001292028	3295	Hs.406861	NM_000414	ENSG00000133835	HSD17B4	DBP|MFE-2|MPF-2|PRLTS1|SDR8C1	hydroxysteroid 17-beta dehydrogenase 4	protein-coding		NO
chr22_28857340_C_T	22	28857340	1.43387	0.00678315	5.35895	intron (NM_001145418, intron 2 of 22)	MIRc|SINE|MIR	1483	NR_106713	102466081		NR_106713	ENSG00000276162	MIR5739	hsa-mir-5739	microRNA 5739	ncRNA		NO
rs12672847	7	9379478	0.724386	0.0270152	5.35821	Intergenic	L1ME2|LINE|L1	-294422	NR_002790	168741	Hs.545134	NR_002790		PER4	-	period circadian clock 3 pseudogene	pseudo	Yes	NO
rs13359507	5	21810739	1.30903	0.0022711	5.35769	intron (NM_001317227, intron 6 of 11)	intron (NM_001317227, intron 6 of 11)	-73824	NR_132787	106635539		NR_132787		SNORA105A	-	small nucleolar RNA, H/ACA box 105A	snoRNA	Yes	NO
chr4_153930963_A_G	4	153930963	1.28508	0.0316057	5.35718	Intergenic	MIR3|SINE|MIR	66828	NM_033393	85462	Hs.132629	NM_033393	ENSG00000137460	FHDC1	-	FH2 domain containing 1	protein-coding	Yes	NO
rs17772064	14	88822871	1.31461	0.000385222	5.35125	Intergenic	Intergenic	-29117	NM_018418	55812	Hs.525518	NM_018418	ENSG00000042317	SPATA7	HEL-S-296|HSD-3.1|HSD3|LCA3	spermatogenesis associated 7	protein-coding	Yes	NO
rs76705636	7	98645049	0.737705	0.0277843	5.34415	intron (NM_181349, intron 10 of 17)	intron (NM_181349, intron 10 of 17)	34261	NR_110102	101927550	Hs.636663	NR_110102	ENSG00000242687	LOC101927550	-	uncharacterized LOC101927550	ncRNA		NO
rs7517558	1	244738592	0.78123	0.0630193	5.3393	intron (NM_173807, intron 11 of 20)	intron (NM_173807, intron 11 of 20)	-77758	NM_001297746	51029	Hs.498317	NM_016076	ENSG00000121644	DESI2	C1orf121|CGI-146|DESI|DESI1|DeSI-2|FAM152A|PNAS-4|PPPDE1	desumoylating isopeptidase 2	protein-coding		NO
chr12_123211817_A_G	12	123211817	0.750124	0.0420564	5.33567	TTS (NM_032554)	TTS (NM_032554)	3312	NM_032554	27198	Hs.610873	NM_032554	ENSG00000196917	HCAR1	FKSG80|GPR104|GPR81|HCA1|LACR1|TA-GPCR|TAGPCR	hydroxycarboxylic acid receptor 1	protein-coding	Yes	NO
chr3_156842653_A_G	3	156842653	1.33456	0.0210746	5.33548	Intergenic	Intergenic	-1862	NR_034007	339894	Hs.478050	NR_034007	ENSG00000243629	LINC00880	-	long intergenic non-protein coding RNA 880	ncRNA		NO
rs1209952	21	40175827	0.753965	0.00125298	5.33076	Intergenic	MIR|SINE|MIR	-1404	NM_001256295	2114	Hs.644231	NM_005239	ENSG00000157557	ETS2	ETS2IT1	ETS proto-oncogene 2, transcription factor	protein-coding	Yes	NO
rs7697239	4	158541687	1.2906	0.0383566	5.32873	Intergenic	L1MC4a|LINE|L1	48045	NR_026992	340017	Hs.428275	NR_026992	ENSG00000234111	LOC340017	-	uncharacterized LOC340017	ncRNA	Yes	NO
rs11899347	2	238949616	0.758497	0.0411286	5.32731	intron (NR_037904, intron 7 of 18)	MIR3|SINE|MIR	-19949	NM_016510	51540	Hs.731909	NM_016510	ENSG00000132330	SCLY	SCL|hSCL	selenocysteine lyase	protein-coding	Yes	NO
rs2066715	9	107588033	0.708208	0.00623394	5.32378	exon (NM_005502, exon 17 of 50)	exon (NM_005502, exon 17 of 50)	62011	NR_130759	55335	Hs.429294	NM_018376	ENSG00000165028	NIPSNAP3B	FP944|NIPSNAP3|SNAP1	nipsnap homolog 3B	protein-coding	Yes	NO
rs7309610	12	49783814	1.31653	0.0287324	5.32314	non-coding (NR_033267, exon 1 of 1)	non-coding (NR_033267, exon 1 of 1)	857	NR_033267	100335030	Hs.687044	NR_033267		LOC100335030	-	FGFR1 oncogene partner 2 pseudogene	pseudo		NO
rs7015780	8	128389507	0.760273	4.33005e-05	5.32211	intron (NR_117099, intron 3 of 3)	MLT1C|LTR|ERVL-MaLR	-23137	NR_109834	101805488	Hs.745578	NR_109834	ENSG00000280997	CCAT2	LINC00873|NCCP1	colon cancer associated transcript 2 (non-protein coding)	ncRNA		YES
rs2295135	14	88894210	1.30062	0.000672673	5.32171	intron (NM_018418, intron 7 of 11)	intron (NM_018418, intron 7 of 11)	42222	NM_001040428	55812	Hs.525518	NM_018418	ENSG00000042317	SPATA7	HEL-S-296|HSD-3.1|HSD3|LCA3	spermatogenesis associated 7	protein-coding		NO
rs10177506	2	216935057	1.30515	0.0450946	5.32033	intron (NM_018441, intron 1 of 7)	L1MA7|LINE|L1	11482	NM_018441	55825	Hs.281680	NM_018441	ENSG00000115425	PECR	DCRRP|HPDHASE|HSA250303|PVIARL|SDR29C1|TERP	peroxisomal trans-2-enoyl-CoA reductase	protein-coding		NO
rs12191593	6	150744436	1.35126	0.0317547	5.31959	Intergenic	MER5A1|DNA|hAT-Charlie	54408	NM_001318495	389434	Hs.310225	NM_203395	ENSG00000009765	IYD	C6orf71|DEHAL1|IYD-1|TDH4	iodotyrosine deiodinase	protein-coding	Yes	NO
rs6005868	22	29165766	1.36255	0.00608297	5.31846	Intergenic	MER90|LTR|ERV1	-2896	NM_001284264	150275	Hs.406460	NM_173510	ENSG00000159873	CCDC117	dJ366L4.1	coiled-coil domain containing 117	protein-coding		NO
chr12_49781653_C_G	12	49781653	1.31653	0.0287324	5.31661	intron (NM_001293285, intron 3 of 14)	L2|LINE|L2	-1304	NR_033267	100335030	Hs.687044	NR_033267		LOC100335030	-	FGFR1 oncogene partner 2 pseudogene	pseudo	Yes	NO
rs7838714	8	128343948	0.758102	3.7647e-05	5.31077	intron (NR_117099, intron 2 of 3)	intron (NR_117099, intron 2 of 3)	-68696	NR_109834	101805488	Hs.745578	NR_109834	ENSG00000280997	CCAT2	LINC00873|NCCP1	colon cancer associated transcript 2 (non-protein coding)	ncRNA		YES
chr4_8775472_G_T	4	8775472	1.2535	0.047274	5.30893	Intergenic	Intergenic	98071	NM_001306142	3166	Hs.104134	NM_018942	ENSG00000215612	HMX1	H6|NKX5-3	H6 family homeobox 1	protein-coding	Yes	NO
rs10059819	5	21838360	1.30149	0.00308095	5.30833	intron (NM_001317227, intron 5 of 11)	MIRb|SINE|MIR	-46203	NR_132787	106635539		NR_132787		SNORA105A	-	small nucleolar RNA, H/ACA box 105A	snoRNA		NO
rs3811474	1	229772932	0.77464	0.0454653	5.30814	exon (NM_014777, exon 4 of 10)	exon (NM_014777, exon 4 of 10)	10969	NM_014777	9816	Hs.533628	NM_014777	ENSG00000135763	URB2	KIAA0133|NET10|NPA2	URB2 ribosome biogenesis 2 homolog (S. cerevisiae)	protein-coding	Yes	NO
rs2235432	22	29169420	1.35735	0.00670244	5.30689	intron (NM_001284265, intron 1 of 4)	MIRb|SINE|MIR	295	NM_001284265	150275	Hs.406460	NM_173510	ENSG00000159873	CCDC117	dJ366L4.1	coiled-coil domain containing 117	protein-coding		NO
chr22_28860167_G_T	22	28860167	1.43085	0.00101646	5.30323	intron (NM_001145418, intron 2 of 22)	LTR78B|LTR|ERV1	4310	NR_106713	102466081		NR_106713	ENSG00000276162	MIR5739	hsa-mir-5739	microRNA 5739	ncRNA		NO
rs9495894	6	141401267	1.36446	0.0220322	5.30201	Intergenic	L1PB1|LINE|L1	396316	NR_039675	100616180		NR_039675	ENSG00000264390	MIR4465	-	microRNA 4465	ncRNA		NO
rs7544794	1	244724092	0.784151	0.0666846	5.29995	exon (NM_001242340, exon 7 of 19)	exon (NM_001242340, exon 7 of 19)	-92258	NM_001297746	51029	Hs.498317	NM_016076	ENSG00000121644	DESI2	C1orf121|CGI-146|DESI|DESI1|DeSI-2|FAM152A|PNAS-4|PPPDE1	desumoylating isopeptidase 2	protein-coding	Yes	NO
chr16_79230421_A_G	16	79230421	1.39228	0.00347243	5.29155	intron (NM_001291997, intron 7 of 7)	intron (NM_001291997, intron 7 of 7)	404201	NM_001031804	4094	Hs.134859	NM_005360	ENSG00000178573	MAF	AYGRP|CCA4|CTRCT21|c-MAF	MAF bZIP transcription factor	protein-coding	Yes	NO
chr12_49918243_C_T	12	49918243	1.31471	0.0296004	5.2914	intron (NM_001293285, intron 13 of 14)	intron (NM_001293285, intron 13 of 14)	-14697	NM_012284	23416	Hs.64064	NM_012284	ENSG00000135519	KCNH3	BEC1|ELK2|Kv12.2	potassium voltage-gated channel subfamily H member 3	protein-coding		NO
rs72881919	2	172620937	1.3061	0.0401993	5.28944	Intergenic	Intergenic	76755	NM_001271785	1781	Hs.546250	NM_001378	ENSG00000077380	DYNC1I2	DIC74|DNCI2|IC2	dynein cytoplasmic 1 intermediate chain 2	protein-coding	Yes	NO
rs11849931	14	53920178	0.733473	0.00485359	5.28869	Intergenic	Intergenic	300106	NR_110062	101927620		NR_110062	ENSG00000258731	LOC101927620	-	uncharacterized LOC101927620	ncRNA	Yes	NO
chr12_49907515_A_T	12	49907515	1.31471	0.0296004	5.2853	intron (NR_120663, intron 10 of 14)	intron (NR_120663, intron 10 of 14)	-25425	NM_012284	23416	Hs.64064	NM_012284	ENSG00000135519	KCNH3	BEC1|ELK2|Kv12.2	potassium voltage-gated channel subfamily H member 3	protein-coding		NO
rs7586675	2	30777269	0.773169	0.0786525	5.28341	intron (NM_001304446, intron 3 of 5)	intron (NM_001304446, intron 3 of 5)	107177	NM_001304446	253558	Hs.468048	NM_182551	ENSG00000172954	LCLAT1	1AGPAT8|AGPAT8|ALCAT1|HSRG1849|LYCAT|UNQ1849	lysocardiolipin acyltransferase 1	protein-coding		NO
rs78350453	2	30708009	0.77537	0.0849029	5.2813	intron (NM_001304445, intron 3 of 7)	intron (NM_001304445, intron 3 of 7)	37917	NM_001304446	253558	Hs.468048	NM_182551	ENSG00000172954	LCLAT1	1AGPAT8|AGPAT8|ALCAT1|HSRG1849|LYCAT|UNQ1849	lysocardiolipin acyltransferase 1	protein-coding	Yes	NO
chr12_70066280_A_G	12	70066280	0.731248	0.00963235	5.28074	intron (NM_001282613, intron 6 of 7)	intron (NM_001282613, intron 6 of 7)	16777	NM_152439	144453	Hs.280782	NM_032735	ENSG00000127325	BEST3	VMD2L3	bestrophin 3	protein-coding	Yes	NO
rs9693143	8	128378025	0.759404	3.70438e-05	5.27374	intron (NR_117099, intron 3 of 3)	MER5A|DNA|hAT-Charlie	-34619	NR_109834	101805488	Hs.745578	NR_109834	ENSG00000280997	CCAT2	LINC00873|NCCP1	colon cancer associated transcript 2 (non-protein coding)	ncRNA		YES
chr12_49802805_G_INDEL	12	49802804	1.31477	0.0292714	5.27236	intron (NM_001293285, intron 3 of 14)	intron (NM_001293285, intron 3 of 14)	19847	NR_033267	100335030	Hs.687044	NR_033267		LOC100335030	-	FGFR1 oncogene partner 2 pseudogene	pseudo		NO
rs10811568	9	21543444	0.720877	0.00833258	5.26883	intron (NR_027054, intron 1 of 3)	intron (NR_027054, intron 1 of 3)	16253	NR_027054	554202	Hs.458096	NR_027054		MIR31HG	hsa-lnc-31	MIR31 host gene	ncRNA		NO
chr5_73228106_A_C	5	73228106	1.34509	0.0083976	5.26355	intron (NM_001080479, intron 36 of 36)	intron (NM_001080479, intron 36 of 36)	118763	NM_001244364	64283	Hs.482521	NM_001080479	ENSG00000214944	ARHGEF28	RGNEF|RIP2|p190RHOGEF	Rho guanine nucleotide exchange factor 28	protein-coding	Yes	NO
chr4_95368942_A_T	4	95368942	0.776327	0.0862802	5.25601	Intergenic	Intergenic	-4066	NM_001011516	10611	Hs.480311	NM_006457	ENSG00000163110	PDLIM5	ENH|ENH1|L9|LIM	PDZ and LIM domain 5	protein-coding	Yes	NO
chr5_32471345_G_T	5	32471345	1.32048	0.0566564	5.25561	Intergenic	L1MC5|LINE|L1	-26478	NM_016107	51663	Hs.435231	NM_016107	ENSG00000056097	ZFR	SPG71|ZFR1	zinc finger RNA binding protein	protein-coding	Yes	NO
rs11239526	10	45918380	0.771998	0.0552521	5.25525	intron (NM_001256154, intron 4 of 12)	MLT1A|LTR|ERVL-MaLR	30189	NR_120674	102724323	Hs.559151	NR_120674	ENSG00000231964	LOC102724323	-	uncharacterized LOC102724323	ncRNA	Yes	NO
rs67027115	8	82290077	1.31356	0.0494469	5.2543	Intergenic	Intergenic	69642	NM_002677	5375	Hs.571512	NM_002677	ENSG00000147588	PMP2	FABP8|M-FABP|MP2|P2	peripheral myelin protein 2	protein-coding	Yes	NO
rs9495873	6	141325406	1.29288	0.0649126	5.2518	Intergenic	Intergenic	320455	NR_039675	100616180		NR_039675	ENSG00000264390	MIR4465	-	microRNA 4465	ncRNA	Yes	NO
rs76908531	12	50160662	1.30958	0.0332802	5.24848	Intergenic	Intergenic	25070	NM_001098576	7009	Hs.743965	NM_003217	ENSG00000139644	TMBIM6	BAXI1|BI-1|TEGT	transmembrane BAX inhibitor motif containing 6	protein-coding		NO
chr3_156842631_G_T	3	156842631	1.3222	0.0254443	5.24839	Intergenic	Intergenic	-1840	NR_034007	339894	Hs.478050	NR_034007	ENSG00000243629	LINC00880	-	long intergenic non-protein coding RNA 880	ncRNA		NO
rs11875940	18	76552667	1.36564	0.00202424	5.24763	Intergenic	Intergenic	-187608	NM_171999	27164	Hs.700557	NM_171999	ENSG00000256463	SALL3	ZNF796	spalt like transcription factor 3	protein-coding	Yes	NO
rs12352425	9	22042086	0.767558	0.0508487	5.24626	intron (NR_047539, intron 3 of 12)	intron (NR_047539, intron 3 of 12)	-32774	NM_004936	1030	Hs.72901	NM_004936	ENSG00000147883	CDKN2B	CDK4I|INK4B|MTS2|P15|TP15|p15INK4b	cyclin dependent kinase inhibitor 2B	protein-coding		NO
chr22_28811817_C_INDEL	22	28811816	1.43093	0.00644828	5.24284	intron (NM_001145418, intron 2 of 22)	intron (NM_001145418, intron 2 of 22)	-44041	NR_106713	102466081		NR_106713	ENSG00000276162	MIR5739	hsa-mir-5739	microRNA 5739	ncRNA		NO
chr13_109281568_A_G	13	109281568	0.772752	0.0220369	5.24168	promoter-TSS (NM_001198950)	promoter-TSS (NM_001198950)	-3	NM_001198950	23026	Hs.656587	NM_015011	ENSG00000041515	MYO16	MYAP3|MYR8|Myo16b|NYAP3|PPP1R107	myosin XVI	protein-coding	Yes	NO
chr16_67397580_C_G	16	67397580	0.757184	0.0461917	5.23276	exon (NM_001161575, exon 3 of 11)	exon (NM_001161575, exon 3 of 11)	16322	NM_001161575	55282	Hs.125139	NM_018296	ENSG00000159708	LRRC36	RORBP70|XLHSRF2	leucine rich repeat containing 36	protein-coding		NO
rs2144922	22	28923317	0.71397	0.00180602	5.23057	intron (NM_001145418, intron 2 of 22)	LTR41B|LTR|ERVL	67460	NR_106713	102466081		NR_106713	ENSG00000276162	MIR5739	hsa-mir-5739	microRNA 5739	ncRNA		NO
chr12_123213236_A_G	12	123213236	0.756852	0.048332	5.23012	3' UTR (NM_032554, exon 1 of 1)	3' UTR (NM_032554, exon 1 of 1)	1893	NM_032554	27198	Hs.610873	NM_032554	ENSG00000196917	HCAR1	FKSG80|GPR104|GPR81|HCA1|LACR1|TA-GPCR|TAGPCR	hydroxycarboxylic acid receptor 1	protein-coding		NO
rs9587240	13	107480494	1.36338	0.0145472	5.22952	Intergenic	ERVL-B4-int|LTR|ERVL	174266	NR_047026	100874173	Hs.569297	NR_047026	ENSG00000230156	LINC00443	-	long intergenic non-protein coding RNA 443	ncRNA	Yes	NO
chr22_28831919_A_G	22	28831919	1.42964	0.0072089	5.22813	intron (NM_001145418, intron 2 of 22)	intron (NM_001145418, intron 2 of 22)	-23938	NR_106713	102466081		NR_106713	ENSG00000276162	MIR5739	hsa-mir-5739	microRNA 5739	ncRNA		NO
rs675005	11	106162312	0.743139	0.00317558	5.22656	Intergenic	Intergenic	40178	NR_120551	101928535	Hs.409078	NR_120551	ENSG00000254811	LOC101928535	-	uncharacterized LOC101928535	ncRNA	Yes	NO
rs7358352	11	49447850	1.28501	0.0196956	5.2246	Intergenic	Intergenic	-132230	NR_027044	440040	Hs.655746	NR_027044	ENSG00000205035	LOC440040	-	glutamate metabotropic receptor 5 pseudogene	pseudo		NO
rs7337946	13	107491437	1.26993	0.0558666	5.22421	Intergenic	Intergenic	185209	NR_047026	100874173	Hs.569297	NR_047026	ENSG00000230156	LINC00443	-	long intergenic non-protein coding RNA 443	ncRNA		NO
rs553395	10	30511016	0.767837	0.0450145	5.21961	intron (NR_120653, intron 2 of 2)	MIRb|SINE|MIR	10235	NR_120653	101929279	Hs.559153	NR_120653		LOC101929279	-	uncharacterized LOC101929279	ncRNA		NO
rs6988647	8	128377656	0.76165	4.45718e-05	5.21756	intron (NR_117099, intron 3 of 3)	intron (NR_117099, intron 3 of 3)	-34988	NR_109834	101805488	Hs.745578	NR_109834	ENSG00000280997	CCAT2	LINC00873|NCCP1	colon cancer associated transcript 2 (non-protein coding)	ncRNA		YES
chr12_104371225_C_T	12	104371225	0.760494	0.0343809	5.2163	intron (NM_003211, intron 2 of 9)	L2c|LINE|L2	11632	NM_003211	6996	Hs.584809	NM_003211	ENSG00000139372	TDG	hTDG	thymine DNA glycosylase	protein-coding		NO
rs2106554	6	67008147	1.38224	0.00059334	5.21565	Intergenic	Intergenic	510375	NR_026540	442229	Hs.390414	NR_026540		SLC25A51P1	MCART3P|bA707M13.1	solute carrier family 25 member 51 pseudogene 1	pseudo	Yes	NO
rs9297753	8	128375270	0.758725	3.49188e-05	5.2127	intron (NR_117099, intron 3 of 3)	intron (NR_117099, intron 3 of 3)	-37374	NR_109834	101805488	Hs.745578	NR_109834	ENSG00000280997	CCAT2	LINC00873|NCCP1	colon cancer associated transcript 2 (non-protein coding)	ncRNA		YES
chr17_28294280_A_G	17	28294280	1.32933	0.0162801	5.21107	intron (NM_198529, intron 3 of 22)	intron (NM_198529, intron 3 of 22)	25657	NR_026738	374786	Hs.662411	NM_198529	ENSG00000176927	EFCAB5	-	EF-hand calcium binding domain 5	protein-coding	Yes	NO
chr2_49371864_C_T	2	49371864	1.36647	0.0260148	5.20634	intron (NM_000145, intron 1 of 9)	intron (NM_000145, intron 1 of 9)	9802	NM_181446	2492	Hs.1428	NM_000145	ENSG00000170820	FSHR	FSHR1|FSHRO|LGR1|ODG1	follicle stimulating hormone receptor	protein-coding		NO
chr9_82053201_A_G	9	82053201	0.712629	0.0137856	5.20058	Intergenic	Kanga1|DNA|TcMar-Tc2	-133487	NM_001282760	7091	Hs.444213	NM_007005	ENSG00000106829	TLE4	BCE-1|BCE1|E(spI)|ESG|ESG4|GRG4|Grg-4	transducin like enhancer of split 4	protein-coding	Yes	NO
chr5_73240087_C_T	5	73240087	1.33777	0.016001	5.19912	Intergenic	L2c|LINE|L2	130744	NM_001244364	64283	Hs.482521	NM_001080479	ENSG00000214944	ARHGEF28	RGNEF|RIP2|p190RHOGEF	Rho guanine nucleotide exchange factor 28	protein-coding		NO
chr22_28820084_INDEL_T	22	28820083	1.42964	0.0072089	5.19821	intron (NM_001145418, intron 2 of 22)	intron (NM_001145418, intron 2 of 22)	-35774	NR_106713	102466081		NR_106713	ENSG00000276162	MIR5739	hsa-mir-5739	microRNA 5739	ncRNA		NO
rs59372312	12	51511269	0.750419	0.0265729	5.19759	intron (NM_001173453, intron 3 of 13)	intron (NM_001173453, intron 3 of 13)	-33815	NM_030809	81566	Hs.524425	NM_030809	ENSG00000110925	CSRNP2	C12orf2|C12orf22|FAM130A1|PPP1R72|TAIP-12	cysteine and serine rich nuclear protein 2	protein-coding	Yes	NO
chr5_81571874_A_C	5	81571874	1.40275	0.016517	5.19566	3' UTR (NM_001025, exon 4 of 4)	3' UTR (NM_001025, exon 4 of 4)	2361	NM_001025	6228	Hs.527193	NM_001025	ENSG00000186468	RPS23	S23	ribosomal protein S23	protein-coding	Yes	NO
rs2408184	12	45613495	0.753921	0.0328453	5.19134	intron (NM_001025356, intron 1 of 19)	intron (NM_001025356, intron 1 of 19)	-3706	NR_037144	51054	Hs.233495	NM_015899	ENSG00000134297	PLEKHA8P1	PLEKHA9	pleckstrin homology domain containing A8 pseudogene 1	pseudo		NO
chr22_28873048_C_T	22	28873048	1.40344	0.0109841	5.18762	intron (NM_001145418, intron 2 of 22)	L1ME2|LINE|L1	17191	NR_106713	102466081		NR_106713	ENSG00000276162	MIR5739	hsa-mir-5739	microRNA 5739	ncRNA		NO
rs3917696	1	169588354	1.29047	0.0769416	5.18514	intron (NM_003005, intron 2 of 16)	intron (NM_003005, intron 2 of 16)	11023	NM_003005	6403	Hs.73800	NM_003005	ENSG00000174175	SELP	CD62|CD62P|GMP140|GRMP|LECAM3|PADGEM|PSEL	selectin P	protein-coding		NO
rs4768394	12	39245720	0.771218	0.0270041	5.18231	intron (NM_153634, intron 3 of 19)	L2c|LINE|L2	53700	NM_153634	144402	Hs.40910	NM_153634	ENSG00000139117	CPNE8	-	copine 8	protein-coding		NO
rs3917703	1	169586933	1.29047	0.0769416	5.18155	intron (NM_003005, intron 2 of 16)	MIR3|SINE|MIR	12444	NM_003005	6403	Hs.73800	NM_003005	ENSG00000174175	SELP	CD62|CD62P|GMP140|GRMP|LECAM3|PADGEM|PSEL	selectin P	protein-coding		NO
rs6035092	20	18619472	0.775889	0.0184329	5.18012	intron (NM_080820, intron 4 of 5)	intron (NM_080820, intron 4 of 5)	50935	NM_080820	92675	Hs.659442	NM_080820	ENSG00000125821	DTD1	C20orf88|DUE-B|DUEB|HARS2|pqn-68	D-tyrosyl-tRNA deacylase 1	protein-coding		NO
rs2649896	12	123238797	1.31396	0.0407348	5.1784	intron (NM_003677, intron 2 of 7)	intron (NM_003677, intron 2 of 7)	1429	NM_003677	8562	Hs.22393	NM_003677	ENSG00000139726	DENR	DRP|DRP1|SMAP-3	density regulated re-initiation and release factor	protein-coding		NO
rs3917705	1	169585550	1.29047	0.0769416	5.17798	intron (NM_003005, intron 3 of 16)	intron (NM_003005, intron 3 of 16)	13827	NM_003005	6403	Hs.73800	NM_003005	ENSG00000174175	SELP	CD62|CD62P|GMP140|GRMP|LECAM3|PADGEM|PSEL	selectin P	protein-coding		NO
chr22_28801009_A_G	22	28801009	0.700327	0.00103485	5.17796	intron (NM_001145418, intron 2 of 22)	intron (NM_001145418, intron 2 of 22)	-54848	NR_106713	102466081		NR_106713	ENSG00000276162	MIR5739	hsa-mir-5739	microRNA 5739	ncRNA		NO
rs4242812	11	50010908	1.27342	0.0147874	5.17786	Intergenic	L1M4|LINE|L1	-6837	NM_001005270	283093	Hs.553669	NM_001005270	ENSG00000221954	OR4C12	OR11-259	olfactory receptor family 4 subfamily C member 12	protein-coding		NO
rs2194452	2	31093502	0.77156	0.031672	5.1761	Intergenic	Intergenic	-63191	NM_144575	92291	Hs.660911	NM_144575	ENSG00000162949	CAPN13	-	calpain 13	protein-coding	Yes	NO
chr14_61938155_C_T	14	61938155	1.42649	0.00990123	5.17574	intron (NM_006255, intron 9 of 13)	intron (NM_006255, intron 9 of 13)	98757	NR_110417	101927780	Hs.254789	NR_110416	ENSG00000250548	LOC101927780	-	uncharacterized LOC101927780	ncRNA	Yes	NO
chr19_51762218_C_T	19	51762218	1.37985	0.0148385	5.17448	intron (NM_173635, intron 1 of 5)	MER21-int|LTR|ERVL	1254	NM_173635	284369	Hs.381087	NM_173635	ENSG00000179213	SIGLECL1	C19orf75|SIGLEC23P|SIGLECP7	SIGLEC family like 1	protein-coding	Yes	NO
rs3917714	1	169583429	1.29047	0.0769416	5.17442	intron (NM_003005, intron 3 of 16)	intron (NM_003005, intron 3 of 16)	15948	NM_003005	6403	Hs.73800	NM_003005	ENSG00000174175	SELP	CD62|CD62P|GMP140|GRMP|LECAM3|PADGEM|PSEL	selectin P	protein-coding		NO
rs3917715	1	169583310	1.29047	0.0769416	5.17088	intron (NM_003005, intron 3 of 16)	intron (NM_003005, intron 3 of 16)	16067	NM_003005	6403	Hs.73800	NM_003005	ENSG00000174175	SELP	CD62|CD62P|GMP140|GRMP|LECAM3|PADGEM|PSEL	selectin P	protein-coding		NO
rs17465052	8	128354080	0.762089	5.17991e-05	5.17045	intron (NR_117099, intron 3 of 3)	L2a|LINE|L2	-58564	NR_109834	101805488	Hs.745578	NR_109834	ENSG00000280997	CCAT2	LINC00873|NCCP1	colon cancer associated transcript 2 (non-protein coding)	ncRNA		YES
rs1829271	4	16021538	0.772783	0.0708336	5.16704	intron (NM_001145850, intron 7 of 24)	intron (NM_001145850, intron 7 of 24)	56203	NM_001145850	8842	Hs.614734	NM_006017	ENSG00000007062	PROM1	AC133|CD133|CORD12|MCDR2|MSTP061|PROML1|RP41|STGD4	prominin 1	protein-coding		NO
rs11694726	2	1460220	0.739103	0.041625	5.1657	intron (NM_175722, intron 6 of 14)	intron (NM_175722, intron 6 of 14)	42040	NM_175722	7173	Hs.467554	NM_000547	ENSG00000115705	TPO	MSA|TDH2A|TPX	thyroid peroxidase	protein-coding		NO
rs7815100	8	128376801	0.762818	4.95982e-05	5.16505	intron (NR_117099, intron 3 of 3)	intron (NR_117099, intron 3 of 3)	-35843	NR_109834	101805488	Hs.745578	NR_109834	ENSG00000280997	CCAT2	LINC00873|NCCP1	colon cancer associated transcript 2 (non-protein coding)	ncRNA		YES
chr1_10098028_A_C	1	10098028	1.54779	0.00248696	5.16411	intron (NM_006048, intron 1 of 26)	intron (NM_006048, intron 1 of 26)	4987	NM_006048	10277	Hs.593974	NM_006048	ENSG00000130939	UBE4B	E4|HDNB1|UBOX3|UFD2|UFD2A	ubiquitination factor E4B	protein-coding	Yes	NO
rs6125	1	169582317	1.28998	0.0774449	5.16035	exon (NM_003005, exon 5 of 17)	exon (NM_003005, exon 5 of 17)	17060	NM_003005	6403	Hs.73800	NM_003005	ENSG00000174175	SELP	CD62|CD62P|GMP140|GRMP|LECAM3|PADGEM|PSEL	selectin P	protein-coding	Yes	NO
rs2677789	4	16018282	0.788074	0.0928272	5.15894	intron (NM_001145850, intron 8 of 24)	intron (NM_001145850, intron 8 of 24)	-53423	NM_031950	83888	Hs.98785	NM_031950	ENSG00000137441	FGFBP2	HBP17RP|KSP37	fibroblast growth factor binding protein 2	protein-coding	Yes	NO
rs7007568	8	128364906	0.762993	4.93676e-05	5.15347	intron (NR_117099, intron 3 of 3)	MIRb|SINE|MIR	-47738	NR_109834	101805488	Hs.745578	NR_109834	ENSG00000280997	CCAT2	LINC00873|NCCP1	colon cancer associated transcript 2 (non-protein coding)	ncRNA		YES
rs6777275	3	80918205	0.773607	0.0170922	5.15124	Intergenic	Intergenic	-124814	NR_132411	728290	Hs.563132	NR_132411	ENSG00000243694	LINC02027	-	long intergenic non-protein coding RNA 2027	ncRNA		NO
rs2244740	12	20177450	1.22381	0.131042	5.15121	intron (NR_040098, intron 2 of 2)	intron (NR_040098, intron 2 of 2)	9831	NR_040098	100506393	Hs.658356	NR_040098	ENSG00000256287	LOC100506393	-	uncharacterized LOC100506393	ncRNA	Yes	NO
rs7831303	8	128376732	0.761473	4.40154e-05	5.14963	intron (NR_117099, intron 3 of 3)	intron (NR_117099, intron 3 of 3)	-35912	NR_109834	101805488	Hs.745578	NR_109834	ENSG00000280997	CCAT2	LINC00873|NCCP1	colon cancer associated transcript 2 (non-protein coding)	ncRNA		YES
chr7_20701952_C_G	7	20701952	1.30673	0.034813	5.14554	intron (NM_178559, intron 5 of 18)	intron (NM_178559, intron 5 of 18)	14986	NM_178559	340273	Hs.404102	NM_178559	ENSG00000004846	ABCB5	ABCB5alpha|ABCB5beta|EST422562	ATP binding cassette subfamily B member 5	protein-coding		NO
rs10167990	2	31101646	0.748103	0.0244793	5.14412	Intergenic	Intergenic	-71335	NM_144575	92291	Hs.660911	NM_144575	ENSG00000162949	CAPN13	-	calpain 13	protein-coding		NO
chr22_28686251_A_C	22	28686251	1.42678	0.00720207	5.13994	intron (NM_001145418, intron 5 of 22)	intron (NM_001145418, intron 5 of 22)	-169606	NR_106713	102466081		NR_106713	ENSG00000276162	MIR5739	hsa-mir-5739	microRNA 5739	ncRNA		NO
chr12_49858009_G_INDEL	12	49858008	1.30851	0.0323463	5.13922	intron (NM_001293285, intron 4 of 14)	AluJb|SINE|Alu	-74932	NM_012284	23416	Hs.64064	NM_012284	ENSG00000135519	KCNH3	BEC1|ELK2|Kv12.2	potassium voltage-gated channel subfamily H member 3	protein-coding		NO
rs9882940	3	80872216	0.775324	0.0185527	5.13878	Intergenic	Intergenic	-170803	NR_132411	728290	Hs.563132	NR_132411	ENSG00000243694	LINC02027	-	long intergenic non-protein coding RNA 2027	ncRNA	Yes	NO
chr22_28502867_A_C	22	28502867	1.43278	0.0092801	5.13596	intron (NM_001145418, intron 7 of 22)	MIRc|SINE|MIR	-186267	NR_036169	100423034		NR_036169	ENSG00000264073	MIR3199-1	mir-3199-1	microRNA 3199-1	ncRNA	Yes	NO
chr12_49804713_INDEL_TTTTAG	12	49804712	1.30282	0.0365052	5.13316	intron (NM_001293285, intron 3 of 14)	intron (NM_001293285, intron 3 of 14)	21755	NR_033267	100335030	Hs.687044	NR_033267		LOC100335030	-	FGFR1 oncogene partner 2 pseudogene	pseudo		NO
rs7782194	7	15035247	0.795396	0.0696089	5.13216	Intergenic	L2a|LINE|L2	-154172	NM_145695	1607	Hs.567255	NM_004080	ENSG00000136267	DGKB	DAGK2|DGK|DGK-BETA	diacylglycerol kinase beta	protein-coding		NO
rs650826	11	49250912	1.27709	0.0230952	5.12945	Intergenic	Intergenic	-20690	NM_001193471	2346	Hs.645352	NM_004476	ENSG00000086205	FOLH1	FGCP|FOLH|GCP2|GCPII|NAALAD1|NAALAdase|PSM|PSMA|mGCP	folate hydrolase 1	protein-coding		NO
chr12_104373462_C_T	12	104373462	0.762107	0.0358995	5.12894	intron (NM_003211, intron 2 of 9)	intron (NM_003211, intron 2 of 9)	13869	NM_003211	6996	Hs.584809	NM_003211	ENSG00000139372	TDG	hTDG	thymine DNA glycosylase	protein-coding		NO
rs4135086	12	104371129	0.762107	0.0358995	5.12342	intron (NM_003211, intron 2 of 9)	L2c|LINE|L2	11536	NM_003211	6996	Hs.584809	NM_003211	ENSG00000139372	TDG	hTDG	thymine DNA glycosylase	protein-coding		NO
chr12_104370850_A_G	12	104370850	0.762107	0.0358995	5.11795	intron (NM_003211, intron 2 of 9)	intron (NM_003211, intron 2 of 9)	11257	NM_003211	6996	Hs.584809	NM_003211	ENSG00000139372	TDG	hTDG	thymine DNA glycosylase	protein-coding		NO
kgp4235349	5	21961088	1.32866	0.00270588	5.11633	intron (NM_001317227, intron 3 of 11)	L1MEf|LINE|L1	76525	NR_132788	106635540		NR_132788		SNORA105B	-	small nucleolar RNA, H/ACA box 105B	snoRNA		NO
chr22_28798655_C_G	22	28798655	1.42201	0.00804124	5.11391	intron (NM_001145418, intron 2 of 22)	MIRb|SINE|MIR	-57202	NR_106713	102466081		NR_106713	ENSG00000276162	MIR5739	hsa-mir-5739	microRNA 5739	ncRNA		NO
chr12_104370479_A_G	12	104370479	0.762107	0.0358995	5.11251	intron (NM_003211, intron 1 of 9)	intron (NM_003211, intron 1 of 9)	10886	NM_003211	6996	Hs.584809	NM_003211	ENSG00000139372	TDG	hTDG	thymine DNA glycosylase	protein-coding	Yes	NO
rs12098986	11	49546908	1.28226	0.0210131	5.1092	Intergenic	Intergenic	-33172	NR_027044	440040	Hs.655746	NR_027044	ENSG00000205035	LOC440040	-	glutamate metabotropic receptor 5 pseudogene	pseudo	Yes	NO
