# Supplementary material for: A multilayered post-GWAS assessment on genetic susceptibility to pancreatic cancer
Source: Genome Med. 2021 Feb 1;13:15. doi: 10.1186/s13073-020-00816-4 (PMC7849104; doi:10.1186/s13073-020-00816-4)
Supplement: Supplementary file 4 — Additional file 4: Table S6. Annotation and functional in silico analysis of the 143 prioritized SNPs. [file 13073_2020_816_MOESM4_ESM.xlsx]

## Sheet: Table S6 GWAS_PanGenEU
Table S6. Annotation and functional in silico analysis of the 143 prioritized SNPs
SNP	chr	position	cytoband	n_annotated_genes	Annotated_SYMBOL_coll	OR_minor	pvalue_minor	CredibleSet
rs12782552	10	21428541	10p12.31	2	C10orf113; NEBL	1.81813	4.98565e-05	Yes
rs661893	10	30895478	10p11.23	1	-	1.3725	2.28436e-05	Yes
rs793088	10	31364621	10p11.22	1	-	1.36222	2.77374e-05	Yes
rs793094	10	31386822	10p11.22	1	-	1.32023	4.02847e-05
rs12415110	10	37096338	10p11.21	1	-	2.03488	6.87762e-05
rs2050502	10	44203201	10q11.21	1	-	1.5736	8.6337e-07	Yes
rs12258494	10	44233503	10q11.21	1	TCEB1P30	1.51546	2.59658e-05
rs4080021	10	44268654	10q11.21	1	RP11-272J7.4	1.50855	3.48536e-05
rs12776000	10	60576687	10q21.1	2	BICC1; -	1.4634	4.58555e-05	Yes
rs3912390	10	82776591	10q23.1	1	-	1.37664	2.98816e-05	Yes
rs1398312	11	106279611	11q22.3	1	-	0.759851	2.94661e-05	Yes
rs6656346	1	111103688	1p13.3	1	-	0.711399	3.84242e-05	Yes
rs12136952	1	12661421	1p36.22	2	DHRS3; -	0.732988	7.16727e-05	Yes
chr1_145556986_C_T	1	145556986	1q21.1	2	ANKRD35; -	0.770558	9.48903e-05	Yes
chr1_145740514_C_T	1	145740514	1q21.1	1	PDZK1	1.73334	4.60902e-05	Yes
chr1_150902203_A_T	1	150902203	1q21.3	1	SETDB1	1.7999	4.93885e-06	Yes
chr1_150974311_A_G	1	150974311	1q21.3	1	FAM63A	1.8463	1.25309e-06
rs6697813	1	15951743	1p36.21	1	DDI2	1.49269	7.48888e-05	Yes
rs2250174	1	160950966	1q23.3	1	-	0.660232	2.6851e-05	Yes
chr11_68446868_A_G	11	68446868	11q13.3	1	GAL	1.5123	3.04469e-05	Yes
rs10798348	1	175194390	1q25.1	1	-	0.703655	7.90985e-05	Yes
rs4652490	1	180217250	1q25.2	2	LHX4; -	1.40799	4.14252e-05	Yes
rs4465241	1	199963622	1q32.1	1	-	0.705999	4.57647e-05
rs3790840	1	200016460	1q32.1	1	NR5A2	1.54008	1.6545e-05
rs12145049	1	203777741	1q32.1	2	ZC3H11A; RP11-397P13.6	0.605168	2.97823e-06	Yes
rs17016036	1	210537248	1q32.2	1	HHAT	0.720205	8.64321e-05	Yes
rs4767014	12	113264755	12q24.13	1	RPH3A	0.691066	9.17783e-05	Yes
rs6560884	12	133142411	12q24.33	1	FBRSL1	1.52571	2.72559e-05	Yes
chr12_133155424_A_G	12	133155424	12q24.33	1	FBRSL1	1.36351	7.05548e-05
rs11118832	1	221884371	1q41	1	DUSP10	1.90177	8.51885e-05	Yes
rs10784548	12	40762546	12q12	1	LRRK2	0.760938	3.39396e-05
rs3759125	12	50343608	12q13.12	3	AQP2; RP11-469H8.6; RP11-469H8.8	0.77468	9.19139e-05	Yes
rs9783504	12	821451	12p13.33	1	-	0.702101	7.66856e-05	Yes
rs7315904	12	835074	12p13.33	1	-	0.689279	3.231e-05
rs249184	12	95340146	12q22	2	NDUFA12; -	1.91974	2.42365e-05	Yes
rs9645898	13	101677816	13q32.3	1	NALCN-AS1	0.677467	8.50135e-06	Yes
rs9557954	13	103576386	13q33.1	1	-	1.39759	6.37392e-05	Yes
rs7325781	13	36080730	13q13.3	1	NBEA	0.706895	2.82862e-05	Yes
rs1461962	13	36081790	13q13.3	1	NBEA	0.717429	1.78691e-05
rs940595	15	24038267	15q11.2	1	-	0.750013	9.72223e-05	Yes
rs4782165	16	14551039	16p13.12	3	PARN; AC092291.1; -	1.66588	5.08773e-05	Yes
rs209451	16	22845744	16p12.2	1	HS3ST2	0.733732	1.38196e-05	Yes
rs7206380	16	79471714	16q23.2	1	-	0.725842	8.65151e-05	Yes
chr17_143542_A_G	17	143542	17p13.3	2	RPH3AL; -	1.32779	3.01809e-05	Yes
chr17_36895206_A_G	17	36895206	17q12	2	PCGF2; CISD3	0.779822	6.13842e-05	Yes
rs67892803	17	46088729	17q21.32	1	-	1.4586	6.42422e-05	Yes
rs11654719	17	64340380	17q24.2	1	PRKCA	1.33738	2.55944e-05	Yes
chr17_69121396_A_G	17	69121396	17q24.3	1	CASC17	0.576021	8.42241e-05	Yes
chr17_69124724_C_T	17	69124724	17q24.3	1	CASC17	0.569826	6.32824e-05
rs7214041	17	70401476	17q24.3	2	LINC00511; -	1.47251	9.1245e-05
rs67284056	18	30696277	18q12.1	1	CCDC178	1.76116	2.61571e-05	Yes
rs34871003	18	30842257	18q12.1	1	CCDC178	1.80429	2.58663e-06	Yes
rs12402858	1	87845112	1p22.3	1	-	1.53933	5.90705e-05	Yes
chr1_87859293_C_G	1	87859293	1p22.3	1	-	1.43952	2.41432e-05
rs11081370	18	8241986	18p11.23	1	PTPRM	1.34456	8.38411e-05	Yes
rs773914	19	16859652	19p13.11	1	NWD1	1.83323	1.70098e-06	Yes
rs8111858	19	4326239	19p13.3	2	FSD1; STAP2	0.736127	7.54227e-05	Yes
rs62209634	20	32456862	20q11.22	1	-	1.55524	4.36246e-05	Yes
rs6074037	20	44769666	20q13.12	1	-	1.35195	7.88571e-05	Yes
rs12625828	20	48844585	20q13.13	1	-	0.716446	6.97813e-05	Yes
rs2232073	20	6065731	20p12.3	1	FERMT1	0.767685	6.73239e-05	Yes
rs4383344	2	120278171	2q14.2	1	SCTR	1.36164	5.28437e-05	Yes
rs13408950	2	14682175	2p24.3	1	-	0.731554	6.21588e-05	Yes
rs34501967	2	174869889	2q31.1	1	-	1.69266	7.25653e-05	Yes
rs35463408	2	175619948	2q31.1	2	CHRNA1; AC018890.6	1.41796	7.06542e-05	Yes
rs2873308	2	236566346	2q37.2	1	AGAP1	0.719004	9.25585e-05	Yes
rs6730757	2	43541598	2p21	1	THADA	0.711706	8.96766e-05	Yes
rs11720514	3	112113334	3q13.2	1	RP11-231E6.1	0.718778	3.00257e-05	Yes
rs999802	3	112127280	3q13.2	2	RP11-231E6.1; -	1.40377	5.2616e-05
rs1683813	3	128666029	3q21.3	2	RP11-723O4.6; KIAA1257	1.28188	9.82088e-05	Yes
chr3_177443968_A_C	3	177443968	3q26.32	1	LINC00578	0.754415	9.01776e-05	Yes
chr3_183881234_A_G	3	183881234	3q27.1	2	DVL3; EIF2B5	1.54315	7.14917e-05	Yes
rs12152217	3	183935258	3q27.1	1	EIF2B5	1.5207	5.93168e-05
rs11922997	3	34997498	3p22.3	1	-	1.41472	7.79641e-05	Yes
rs2584051	3	3842821	3p26.2	3	LRRN1; SUMF1; -	0.5807	3.14852e-05
rs7635135	3	66892025	3p14.1	1	-	0.738888	4.57164e-05	Yes
chr4_125576612_C_T	4	125576612	4q28.1	1	-	1.4166	2.69931e-05	Yes
rs2391054	4	127343002	4q28.1	1	-	0.701176	1.32592e-05	Yes
rs2706822	4	168362952	4q32.3	1	-	0.706393	7.55372e-05	Yes
rs11734697	4	181125964	4q34.3	1	-	0.733827	8.17593e-05	Yes
rs4689545	4	6767336	4p16.1	1	-	0.741076	5.68876e-05	Yes
chr4_69266379_C_G	4	69266379	4q13.2	1	-	1.47359	7.73951e-05	Yes
rs10032900	4	7491757	4p16.1	1	SORCS2	1.28642	8.57172e-05	Yes
rs6869928	5	10589502	5p15.2	1	ANKRD33B	0.738369	2.21499e-05	Yes
rs4702704	5	10591672	5p15.2	1	ANKRD33B	1.33483	1.4162e-05
rs2736098	5	1294086	5p15.33	2	TERT; -	0.749618	7.52325e-05	Yes
rs10079348	5	1384607	5p15.33	1	RP11-325I22.2	0.683777	6.59675e-05	Yes
rs7717113	5	172781401	5q35.1	1	-	0.726574	9.36574e-05	Yes
rs16888572	5	21718946	5p14.3	1	RP11-804N13.1	1.45416	5.11277e-05	Yes
rs6453061	5	73771666	5q13.3	1	CTC-419K13.1	1.32317	2.22278e-05	Yes
rs12206846	6	108238917	6q21	2	SEC63; -	1.37421	3.10557e-05	Yes
chr6_109038333_A_G	6	109038333	6q21	1	-	1.33752	5.22703e-05	Yes
rs74969259	6	23504700	6p22.3	1	-	1.71064	4.36541e-05	Yes
rs761098	6	2449186	6p25.2	2	GMDS-AS1; -	0.717735	5.22448e-05	Yes
rs12524673	6	25432769	6p22.2	3	LRRC16A; snoU13; -	0.625348	4.55168e-05	Yes
rs9261418	6	30076660	6p22.1	2	TRIM31; TRIM31-AS1	1.56542	9.56219e-05	Yes
chr6_41354653_C_T	6	41354653	6p21.1	1	-	0.62093	3.6962e-05	Yes
chr6_41354872_A_C	6	41354872	6p21.1	1	-	0.611697	2.31707e-05
chr6_41362013_G_T	6	41362013	6p21.1	1	-	0.620516	3.9375e-05
rs4706458	6	71382765	6q13	1	SMAP1	0.709395	4.05199e-05	Yes
rs2504748	6	71583804	6q13	1	B3GAT2	1.38771	6.63157e-05
rs2647417	6	76435943	6q14.1	1	-	1.51733	6.95321e-05	Yes
kgp3489492	7	102807820	7q22.1	1	-	0.640668	6.97524e-05
rs62482372	7	102924512	7q22.1	1	DPY19L2P2	0.558187	5.08446e-05
chr7_130488534_C_T	7	130488534	7q32.3	1	-	0.71654	7.36305e-05	Yes
rs8175950	7	142661695	7q34	2	KEL; -	1.90199	8.38833e-05	Yes
rs6957979	7	36982483	7p14.2	1	ELMO1	1.47083	9.36461e-05
chr7_47538546_C_T	7	47538546	7p12.3	1	TNS3	0.675033	3.15954e-05	Yes
chr7_587783_C_G	7	587783	7p22.3	2	PRKAR1B; AC147651.2	1.30678	6.86916e-05	Yes
rs3801714	7	81830424	7q21.11	1	CACNA2D1	0.571623	2.74477e-05	Yes
rs12549518	8	128309591	8q24.21	2	CASC8; RP11-382A18.3	0.748692	1.07528e-05	Yes
rs6996866	8	128310155	8q24.21	1	CASC8	0.743934	6.96605e-06
rs283727	8	128313360	8q24.21	1	CASC8	1.30987	3.8698e-05
rs283728	8	128313500	8q24.21	1	CASC8	1.30869	4.24775e-05
rs4871015	8	128314516	8q24.21	1	CASC8	0.761771	4.17555e-05
rs283705	8	128317450	8q24.21	2	CASC8; -	1.30139	5.7882e-05
rs11781932	8	128330178	8q24.21	1	CASC8	0.764634	5.32839e-05
rs7002712	8	128341612	8q24.21	2	CASC8; -	0.761707	3.91317e-05
rs7838714	8	128343948	8q24.21	1	CASC8	0.758102	3.7647e-05
rs17465052	8	128354080	8q24.21	3	CASC8; RP11-382A18.2; -	0.762089	5.17991e-05
rs10098985	8	128355019	8q24.21	3	CASC8; RP11-382A18.2; -	0.724153	9.06497e-05
rs10097200	8	128363652	8q24.21	2	CASC8; RP11-382A18.2	0.768919	7.84704e-05
rs7002826	8	128364271	8q24.21	2	CASC8; RP11-382A18.2	0.76739	7.13989e-05
rs7007568	8	128364906	8q24.21	3	CASC8; RP11-382A18.2; -	0.762993	4.93676e-05
rs7842494	8	128366570	8q24.21	2	CASC8; RP11-382A18.2	0.759647	4.56476e-05
rs5022926	8	128366829	8q24.21	2	CASC8; RP11-382A18.2	0.766828	6.73832e-05
rs9297753	8	128375270	8q24.21	2	CASC8; RP11-382A18.2	0.758725	3.49188e-05
rs9283954	8	128375370	8q24.21	2	CASC8; RP11-382A18.2	0.759552	4.53987e-05
rs7831303	8	128376732	8q24.21	3	CASC8; RP11-382A18.2; -	0.761473	4.40154e-05
rs7815100	8	128376801	8q24.21	3	CASC8; RP11-382A18.2; -	0.762818	4.95982e-05
rs6988647	8	128377656	8q24.21	3	CASC8; RP11-382A18.2; -	0.76165	4.45718e-05
rs9692890	8	128377774	8q24.21	3	CASC8; RP11-382A18.2; -	0.766198	7.69592e-05
rs9693143	8	128378025	8q24.21	3	CASC8; RP11-382A18.2; -	0.759404	3.70438e-05
rs16902126	8	128382357	8q24.21	2	CASC8; RP11-382A18.2	0.772326	9.96391e-05
rs7815245	8	128383597	8q24.21	3	CASC8; RP11-382A18.2; -	0.766591	6.83337e-05
rs1562430	8	128387852	8q24.21	3	CASC8; RP11-382A18.2; -	0.767949	7.2838e-05
rs7015780	8	128389507	8q24.21	2	CASC8; RP11-382A18.2	0.760273	4.33005e-05
rs2052701	8	133731794	8q24.22	1	TMEM71	1.36981	8.55879e-05	Yes
rs180204	8	133881244	8q24.22	1	TG	1.37334	3.13633e-05
rs2247583	8	14604752	8p22	1	SGCZ	1.46739	7.7981e-06	Yes
rs4733347	8	32376010	8p12	1	NRG1	0.703143	7.46463e-05	Yes
rs1108144	8	96404286	8q22.1	1	KB-1047C11.2	1.39774	4.93888e-05	Yes
rs11778211	8	96407360	8q22.1	1	KB-1047C11.2	0.773213	8.73229e-05

## Sheet: Table S6 eQTL_cisTCGA
SNP	chr	position	cytoband	n_annotated_genes	Annotated_SYMBOL_coll	SYMBOL_TCGA_coll	slope_eQTL_TCGA_coll	n_eQTLs_TCGA_pancreas
rs12782552	10	21428541	10p12.31	2	C10orf113; NEBL	NA	NA	#N/A
rs661893	10	30895478	10p11.23	1	-	NA	NA	#N/A
rs793088	10	31364621	10p11.22	1	-	NA	NA	#N/A
rs793094	10	31386822	10p11.22	1	-	NA	NA	#N/A
rs12415110	10	37096338	10p11.21	1	-	NA	NA	#N/A
rs2050502	10	44203201	10q11.21	1	-	NA	NA	#N/A
rs12258494	10	44233503	10q11.21	1	TCEB1P30	NA	NA	#N/A
rs4080021	10	44268654	10q11.21	1	RP11-272J7.4	NA	NA	#N/A
rs12776000	10	60576687	10q21.1	2	BICC1; -	NA	NA	#N/A
rs3912390	10	82776591	10q23.1	1	-	NA	NA	#N/A
rs1398312	11	106279611	11q22.3	1	-	NA	NA	#N/A
rs6656346	1	111103688	1p13.3	1	-	NA	NA	#N/A
rs12136952	1	12661421	1p36.22	2	DHRS3; -	NA	NA	#N/A
chr1_145556986_C_T	1	145556986	1q21.1	2	ANKRD35; -	NA	NA	#N/A
chr1_145740514_C_T	1	145740514	1q21.1	1	PDZK1	NA	NA	#N/A
chr1_150902203_A_T	1	150902203	1q21.3	1	SETDB1	NA	NA	#N/A
chr1_150974311_A_G	1	150974311	1q21.3	1	FAM63A	NA	NA	#N/A
rs6697813	1	15951743	1p36.21	1	DDI2	C1orf144	0.41	1
rs2250174	1	160950966	1q23.3	1	-	NA	NA	#N/A
chr11_68446868_A_G	11	68446868	11q13.3	1	GAL	NA	NA	#N/A
rs10798348	1	175194390	1q25.1	1	-	NA	NA	#N/A
rs4652490	1	180217250	1q25.2	2	LHX4; -	NA	NA	#N/A
rs4465241	1	199963622	1q32.1	1	-	NA	NA	#N/A
rs3790840	1	200016460	1q32.1	1	NR5A2	NA	NA	#N/A
rs12145049	1	203777741	1q32.1	2	ZC3H11A; RP11-397P13.6	NA	NA	#N/A
rs17016036	1	210537248	1q32.2	1	HHAT	NA	NA	#N/A
rs4767014	12	113264755	12q24.13	1	RPH3A	NA	NA	#N/A
rs6560884	12	133142411	12q24.33	1	FBRSL1	NA	NA	#N/A
chr12_133155424_A_G	12	133155424	12q24.33	1	FBRSL1	NA	NA	#N/A
rs11118832	1	221884371	1q41	1	DUSP10	NA	NA	#N/A
rs10784548	12	40762546	12q12	1	LRRK2	NA	NA	#N/A
rs3759125	12	50343608	12q13.12	3	AQP2; RP11-469H8.6; RP11-469H8.8	NA	NA	#N/A
rs9783504	12	821451	12p13.33	1	-	NA	NA	#N/A
rs7315904	12	835074	12p13.33	1	-	NA	NA	#N/A
rs249184	12	95340146	12q22	2	NDUFA12; -	NA	NA	#N/A
rs9645898	13	101677816	13q32.3	1	NALCN-AS1	NA	NA	#N/A
rs9557954	13	103576386	13q33.1	1	-	NA	NA	#N/A
rs7325781	13	36080730	13q13.3	1	NBEA	NA	NA	#N/A
rs1461962	13	36081790	13q13.3	1	NBEA	NA	NA	#N/A
rs940595	15	24038267	15q11.2	1	-	NA	NA	#N/A
rs4782165	16	14551039	16p13.12	3	PARN; AC092291.1; -	NA	NA	#N/A
rs209451	16	22845744	16p12.2	1	HS3ST2	NA	NA	#N/A
rs7206380	16	79471714	16q23.2	1	-	NA	NA	#N/A
chr17_143542_A_G	17	143542	17p13.3	2	RPH3AL; -	NA	NA	#N/A
chr17_36895206_A_G	17	36895206	17q12	2	PCGF2; CISD3	NA	NA	#N/A
rs67892803	17	46088729	17q21.32	1	-	NA	NA	#N/A
rs11654719	17	64340380	17q24.2	1	PRKCA	NA	NA	#N/A
chr17_69121396_A_G	17	69121396	17q24.3	1	CASC17	NA	NA	#N/A
chr17_69124724_C_T	17	69124724	17q24.3	1	CASC17	NA	NA	#N/A
rs7214041	17	70401476	17q24.3	2	LINC00511; -	NA	NA	#N/A
rs67284056	18	30696277	18q12.1	1	CCDC178	NA	NA	#N/A
rs34871003	18	30842257	18q12.1	1	CCDC178	NA	NA	#N/A
rs12402858	1	87845112	1p22.3	1	-	NA	NA	#N/A
chr1_87859293_C_G	1	87859293	1p22.3	1	-	NA	NA	#N/A
rs11081370	18	8241986	18p11.23	1	PTPRM	NA	NA	#N/A
rs773914	19	16859652	19p13.11	1	NWD1	NA	NA	#N/A
rs8111858	19	4326239	19p13.3	2	FSD1; STAP2	NA	NA	#N/A
rs62209634	20	32456862	20q11.22	1	-	NA	NA	#N/A
rs6074037	20	44769666	20q13.12	1	-	NA	NA	#N/A
rs12625828	20	48844585	20q13.13	1	-	NA	NA	#N/A
rs2232073	20	6065731	20p12.3	1	FERMT1	NA	NA	#N/A
rs4383344	2	120278171	2q14.2	1	SCTR	NA	NA	#N/A
rs13408950	2	14682175	2p24.3	1	-	NA	NA	#N/A
rs34501967	2	174869889	2q31.1	1	-	NA	NA	#N/A
rs35463408	2	175619948	2q31.1	2	CHRNA1; AC018890.6	NA	NA	#N/A
rs2873308	2	236566346	2q37.2	1	AGAP1	NA	NA	#N/A
rs6730757	2	43541598	2p21	1	THADA	NA	NA	#N/A
rs11720514	3	112113334	3q13.2	1	RP11-231E6.1	NA	NA	#N/A
rs999802	3	112127280	3q13.2	2	RP11-231E6.1; -	NA	NA	#N/A
rs1683813	3	128666029	3q21.3	2	RP11-723O4.6; KIAA1257	NA	NA	#N/A
chr3_177443968_A_C	3	177443968	3q26.32	1	LINC00578	NA	NA	#N/A
chr3_183881234_A_G	3	183881234	3q27.1	2	DVL3; EIF2B5	NA	NA	#N/A
rs12152217	3	183935258	3q27.1	1	EIF2B5	NA	NA	#N/A
rs11922997	3	34997498	3p22.3	1	-	NA	NA	#N/A
rs2584051	3	3842821	3p26.2	3	LRRN1; SUMF1; -	NA	NA	#N/A
rs7635135	3	66892025	3p14.1	1	-	NA	NA	#N/A
chr4_125576612_C_T	4	125576612	4q28.1	1	-	NA	NA	#N/A
rs2391054	4	127343002	4q28.1	1	-	NA	NA	#N/A
rs2706822	4	168362952	4q32.3	1	-	NA	NA	#N/A
rs11734697	4	181125964	4q34.3	1	-	NA	NA	#N/A
rs4689545	4	6767336	4p16.1	1	-	NA	NA	#N/A
chr4_69266379_C_G	4	69266379	4q13.2	1	-	NA	NA	#N/A
rs10032900	4	7491757	4p16.1	1	SORCS2	NA	NA	#N/A
rs6869928	5	10589502	5p15.2	1	ANKRD33B	NA	NA	#N/A
rs4702704	5	10591672	5p15.2	1	ANKRD33B	NA	NA	#N/A
rs2736098	5	1294086	5p15.33	2	TERT; -	NA	NA	#N/A
rs10079348	5	1384607	5p15.33	1	RP11-325I22.2	NA	NA	#N/A
rs7717113	5	172781401	5q35.1	1	-	NA	NA	#N/A
rs16888572	5	21718946	5p14.3	1	RP11-804N13.1	NA	NA	#N/A
rs6453061	5	73771666	5q13.3	1	CTC-419K13.1	NA	NA	#N/A
rs12206846	6	108238917	6q21	2	SEC63; -	NA	NA	#N/A
chr6_109038333_A_G	6	109038333	6q21	1	-	NA	NA	#N/A
rs74969259	6	23504700	6p22.3	1	-	NA	NA	#N/A
rs761098	6	2449186	6p25.2	2	GMDS-AS1; -	NA	NA	#N/A
rs12524673	6	25432769	6p22.2	3	LRRC16A; snoU13; -	NA	NA	#N/A
rs9261418	6	30076660	6p22.1	2	TRIM31; TRIM31-AS1	NA	NA	#N/A
chr6_41354653_C_T	6	41354653	6p21.1	1	-	NA	NA	#N/A
chr6_41354872_A_C	6	41354872	6p21.1	1	-	NA	NA	#N/A
chr6_41362013_G_T	6	41362013	6p21.1	1	-	NA	NA	#N/A
rs4706458	6	71382765	6q13	1	SMAP1	NA	NA	#N/A
rs2504748	6	71583804	6q13	1	B3GAT2	NA	NA	#N/A
rs2647417	6	76435943	6q14.1	1	-	NA	NA	#N/A
kgp3489492	7	102807820	7q22.1	1	-	NA	NA	#N/A
rs62482372	7	102924512	7q22.1	1	DPY19L2P2	NA	NA	#N/A
chr7_130488534_C_T	7	130488534	7q32.3	1	-	NA	NA	#N/A
rs8175950	7	142661695	7q34	2	KEL; -	NA	NA	#N/A
rs6957979	7	36982483	7p14.2	1	ELMO1	KIAA0895	0.32	1
chr7_47538546_C_T	7	47538546	7p12.3	1	TNS3	NA	NA	#N/A
chr7_587783_C_G	7	587783	7p22.3	2	PRKAR1B; AC147651.2	NA	NA	#N/A
rs3801714	7	81830424	7q21.11	1	CACNA2D1	NA	NA	#N/A
rs12549518	8	128309591	8q24.21	2	CASC8; RP11-382A18.3	NA	NA	#N/A
rs6996866	8	128310155	8q24.21	1	CASC8	NA	NA	#N/A
rs283727	8	128313360	8q24.21	1	CASC8	NA	NA	#N/A
rs283728	8	128313500	8q24.21	1	CASC8	NA	NA	#N/A
rs4871015	8	128314516	8q24.21	1	CASC8	NA	NA	#N/A
rs283705	8	128317450	8q24.21	2	CASC8; -	NA	NA	#N/A
rs11781932	8	128330178	8q24.21	1	CASC8	NA	NA	#N/A
rs7002712	8	128341612	8q24.21	2	CASC8; -	NA	NA	#N/A
rs7838714	8	128343948	8q24.21	1	CASC8	NA	NA	#N/A
rs17465052	8	128354080	8q24.21	3	CASC8; RP11-382A18.2; -	NA	NA	#N/A
rs10098985	8	128355019	8q24.21	3	CASC8; RP11-382A18.2; -	NA	NA	#N/A
rs10097200	8	128363652	8q24.21	2	CASC8; RP11-382A18.2	NA	NA	#N/A
rs7002826	8	128364271	8q24.21	2	CASC8; RP11-382A18.2	NA	NA	#N/A
rs7007568	8	128364906	8q24.21	3	CASC8; RP11-382A18.2; -	NA	NA	#N/A
rs7842494	8	128366570	8q24.21	2	CASC8; RP11-382A18.2	NA	NA	#N/A
rs5022926	8	128366829	8q24.21	2	CASC8; RP11-382A18.2	NA	NA	#N/A
rs9297753	8	128375270	8q24.21	2	CASC8; RP11-382A18.2	NA	NA	#N/A
rs9283954	8	128375370	8q24.21	2	CASC8; RP11-382A18.2	NA	NA	#N/A
rs7831303	8	128376732	8q24.21	3	CASC8; RP11-382A18.2; -	NA	NA	#N/A
rs7815100	8	128376801	8q24.21	3	CASC8; RP11-382A18.2; -	NA	NA	#N/A
rs6988647	8	128377656	8q24.21	3	CASC8; RP11-382A18.2; -	NA	NA	#N/A
rs9692890	8	128377774	8q24.21	3	CASC8; RP11-382A18.2; -	NA	NA	#N/A
rs9693143	8	128378025	8q24.21	3	CASC8; RP11-382A18.2; -	NA	NA	#N/A
rs16902126	8	128382357	8q24.21	2	CASC8; RP11-382A18.2	NA	NA	#N/A
rs7815245	8	128383597	8q24.21	3	CASC8; RP11-382A18.2; -	NA	NA	#N/A
rs1562430	8	128387852	8q24.21	3	CASC8; RP11-382A18.2; -	NA	NA	#N/A
rs7015780	8	128389507	8q24.21	2	CASC8; RP11-382A18.2	NA	NA	#N/A
rs2052701	8	133731794	8q24.22	1	TMEM71	NA	NA	#N/A
rs180204	8	133881244	8q24.22	1	TG	NA	NA	#N/A
rs2247583	8	14604752	8p22	1	SGCZ	NA	NA	#N/A
rs4733347	8	32376010	8p12	1	NRG1	NA	NA	#N/A
rs1108144	8	96404286	8q22.1	1	KB-1047C11.2	NA	NA	#N/A
rs11778211	8	96407360	8q22.1	1	KB-1047C11.2	NA	NA	#N/A

## Sheet: Table S6 eQTL_cisGTEx
SNP	chr	position	cytoband	n_annotated_genes	Annotated_SYMBOL_coll	SYMBOL_GTEx_p_coll	slope_eQTL_GTEx_p_coll	n_eQTLs_GTEx_pancreas
rs12782552	10	21428541	10p12.31	2	C10orf113; NEBL	NA	NA	#N/A
rs661893	10	30895478	10p11.23	1	-	NA	NA	#N/A
rs793088	10	31364621	10p11.22	1	-	NA	NA	#N/A
rs793094	10	31386822	10p11.22	1	-	NA	NA	#N/A
rs12415110	10	37096338	10p11.21	1	-	NA	NA	#N/A
rs2050502	10	44203201	10q11.21	1	-	NA	NA	#N/A
rs12258494	10	44233503	10q11.21	1	TCEB1P30	NA	NA	#N/A
rs4080021	10	44268654	10q11.21	1	RP11-272J7.4	NA	NA	#N/A
rs12776000	10	60576687	10q21.1	2	BICC1; -	NA	NA	#N/A
rs3912390	10	82776591	10q23.1	1	-	NA	NA	#N/A
rs1398312	11	106279611	11q22.3	1	-	NA	NA	#N/A
rs6656346	1	111103688	1p13.3	1	-	NA	NA	#N/A
rs12136952	1	12661421	1p36.22	2	DHRS3; -	NA	NA	#N/A
chr1_145556986_C_T	1	145556986	1q21.1	2	ANKRD35; -	NA	NA	#N/A
chr1_145740514_C_T	1	145740514	1q21.1	1	PDZK1	NA	NA	#N/A
chr1_150902203_A_T	1	150902203	1q21.3	1	SETDB1	NA	NA	#N/A
chr1_150974311_A_G	1	150974311	1q21.3	1	FAM63A	NA	NA	#N/A
rs6697813	1	15951743	1p36.21	1	DDI2	NA	NA	#N/A
rs2250174	1	160950966	1q23.3	1	-	NA	NA	#N/A
chr11_68446868_A_G	11	68446868	11q13.3	1	GAL	NA	NA	#N/A
rs10798348	1	175194390	1q25.1	1	-	NA	NA	#N/A
rs4652490	1	180217250	1q25.2	2	LHX4; -	NA	NA	#N/A
rs4465241	1	199963622	1q32.1	1	-	NA	NA	#N/A
rs3790840	1	200016460	1q32.1	1	NR5A2	NA	NA	#N/A
rs12145049	1	203777741	1q32.1	2	ZC3H11A; RP11-397P13.6	NA	NA	#N/A
rs17016036	1	210537248	1q32.2	1	HHAT	NA	NA	#N/A
rs4767014	12	113264755	12q24.13	1	RPH3A	NA	NA	#N/A
rs6560884	12	133142411	12q24.33	1	FBRSL1	FBRSL1	-0.653455	1
chr12_133155424_A_G	12	133155424	12q24.33	1	FBRSL1	NA	NA	#N/A
rs11118832	1	221884371	1q41	1	DUSP10	NA	NA	#N/A
rs10784548	12	40762546	12q12	1	LRRK2	NA	NA	#N/A
rs3759125	12	50343608	12q13.12	3	AQP2; RP11-469H8.6; RP11-469H8.8	NA	NA	#N/A
rs9783504	12	821451	12p13.33	1	-	NA	NA	#N/A
rs7315904	12	835074	12p13.33	1	-	NA	NA	#N/A
rs249184	12	95340146	12q22	2	NDUFA12; -	NA	NA	#N/A
rs9645898	13	101677816	13q32.3	1	NALCN-AS1	NA	NA	#N/A
rs9557954	13	103576386	13q33.1	1	-	NA	NA	#N/A
rs7325781	13	36080730	13q13.3	1	NBEA	NA	NA	#N/A
rs1461962	13	36081790	13q13.3	1	NBEA	NA	NA	#N/A
rs940595	15	24038267	15q11.2	1	-	NA	NA	#N/A
rs4782165	16	14551039	16p13.12	3	PARN; AC092291.1; -	NA	NA	#N/A
rs209451	16	22845744	16p12.2	1	HS3ST2	NA	NA	#N/A
rs7206380	16	79471714	16q23.2	1	-	NA	NA	#N/A
chr17_143542_A_G	17	143542	17p13.3	2	RPH3AL; -	NA	NA	#N/A
chr17_36895206_A_G	17	36895206	17q12	2	PCGF2; CISD3	NA	NA	#N/A
rs67892803	17	46088729	17q21.32	1	-	NA	NA	#N/A
rs11654719	17	64340380	17q24.2	1	PRKCA	NA	NA	#N/A
chr17_69121396_A_G	17	69121396	17q24.3	1	CASC17	NA	NA	#N/A
chr17_69124724_C_T	17	69124724	17q24.3	1	CASC17	NA	NA	#N/A
rs7214041	17	70401476	17q24.3	2	LINC00511; -	NA	NA	#N/A
rs67284056	18	30696277	18q12.1	1	CCDC178	NA	NA	#N/A
rs34871003	18	30842257	18q12.1	1	CCDC178	NA	NA	#N/A
rs12402858	1	87845112	1p22.3	1	-	NA	NA	#N/A
chr1_87859293_C_G	1	87859293	1p22.3	1	-	NA	NA	#N/A
rs11081370	18	8241986	18p11.23	1	PTPRM	NA	NA	#N/A
rs773914	19	16859652	19p13.11	1	NWD1	NA	NA	#N/A
rs8111858	19	4326239	19p13.3	2	FSD1; STAP2	STAP2	0.281827	1
rs62209634	20	32456862	20q11.22	1	-	NA	NA	#N/A
rs6074037	20	44769666	20q13.12	1	-	NA	NA	#N/A
rs12625828	20	48844585	20q13.13	1	-	NA	NA	#N/A
rs2232073	20	6065731	20p12.3	1	FERMT1	NA	NA	#N/A
rs4383344	2	120278171	2q14.2	1	SCTR	NA	NA	#N/A
rs13408950	2	14682175	2p24.3	1	-	NA	NA	#N/A
rs34501967	2	174869889	2q31.1	1	-	NA	NA	#N/A
rs35463408	2	175619948	2q31.1	2	CHRNA1; AC018890.6	NA	NA	#N/A
rs2873308	2	236566346	2q37.2	1	AGAP1	NA	NA	#N/A
rs6730757	2	43541598	2p21	1	THADA	NA	NA	#N/A
rs11720514	3	112113334	3q13.2	1	RP11-231E6.1	NA	NA	#N/A
rs999802	3	112127280	3q13.2	2	RP11-231E6.1; -	NA	NA	#N/A
rs1683813	3	128666029	3q21.3	2	RP11-723O4.6; KIAA1257	LOC653712; RP11-723O4.9	0.444714; 0.448913	2
chr3_177443968_A_C	3	177443968	3q26.32	1	LINC00578	NA	NA	#N/A
chr3_183881234_A_G	3	183881234	3q27.1	2	DVL3; EIF2B5	NA	NA	#N/A
rs12152217	3	183935258	3q27.1	1	EIF2B5	NA	NA	#N/A
rs11922997	3	34997498	3p22.3	1	-	NA	NA	#N/A
rs2584051	3	3842821	3p26.2	3	LRRN1; SUMF1; -	NA	NA	#N/A
rs7635135	3	66892025	3p14.1	1	-	NA	NA	#N/A
chr4_125576612_C_T	4	125576612	4q28.1	1	-	NA	NA	#N/A
rs2391054	4	127343002	4q28.1	1	-	NA	NA	#N/A
rs2706822	4	168362952	4q32.3	1	-	NA	NA	#N/A
rs11734697	4	181125964	4q34.3	1	-	NA	NA	#N/A
rs4689545	4	6767336	4p16.1	1	-	NA	NA	#N/A
chr4_69266379_C_G	4	69266379	4q13.2	1	-	NA	NA	#N/A
rs10032900	4	7491757	4p16.1	1	SORCS2	NA	NA	#N/A
rs6869928	5	10589502	5p15.2	1	ANKRD33B	NA	NA	#N/A
rs4702704	5	10591672	5p15.2	1	ANKRD33B	NA	NA	#N/A
rs2736098	5	1294086	5p15.33	2	TERT; -	NA	NA	#N/A
rs10079348	5	1384607	5p15.33	1	RP11-325I22.2	NA	NA	#N/A
rs7717113	5	172781401	5q35.1	1	-	NA	NA	#N/A
rs16888572	5	21718946	5p14.3	1	RP11-804N13.1	NA	NA	#N/A
rs6453061	5	73771666	5q13.3	1	CTC-419K13.1	NA	NA	#N/A
rs12206846	6	108238917	6q21	2	SEC63; -	NA	NA	#N/A
chr6_109038333_A_G	6	109038333	6q21	1	-	NA	NA	#N/A
rs74969259	6	23504700	6p22.3	1	-	NA	NA	#N/A
rs761098	6	2449186	6p25.2	2	GMDS-AS1; -	NA	NA	#N/A
rs12524673	6	25432769	6p22.2	3	LRRC16A; snoU13; -	NA	NA	#N/A
rs9261418	6	30076660	6p22.1	2	TRIM31; TRIM31-AS1	NA	NA	#N/A
chr6_41354653_C_T	6	41354653	6p21.1	1	-	NA	NA	#N/A
chr6_41354872_A_C	6	41354872	6p21.1	1	-	NA	NA	#N/A
chr6_41362013_G_T	6	41362013	6p21.1	1	-	NA	NA	#N/A
rs4706458	6	71382765	6q13	1	SMAP1	NA	NA	#N/A
rs2504748	6	71583804	6q13	1	B3GAT2	NA	NA	#N/A
rs2647417	6	76435943	6q14.1	1	-	NA	NA	#N/A
kgp3489492	7	102807820	7q22.1	1	-	NA	NA	#N/A
rs62482372	7	102924512	7q22.1	1	DPY19L2P2	NA	NA	#N/A
chr7_130488534_C_T	7	130488534	7q32.3	1	-	NA	NA	#N/A
rs8175950	7	142661695	7q34	2	KEL; -	NA	NA	#N/A
rs6957979	7	36982483	7p14.2	1	ELMO1	NA	NA	#N/A
chr7_47538546_C_T	7	47538546	7p12.3	1	TNS3	NA	NA	#N/A
chr7_587783_C_G	7	587783	7p22.3	2	PRKAR1B; AC147651.2	NA	NA	#N/A
rs3801714	7	81830424	7q21.11	1	CACNA2D1	NA	NA	#N/A
rs12549518	8	128309591	8q24.21	2	CASC8; RP11-382A18.3	NA	NA	#N/A
rs6996866	8	128310155	8q24.21	1	CASC8	NA	NA	#N/A
rs283727	8	128313360	8q24.21	1	CASC8	NA	NA	#N/A
rs283728	8	128313500	8q24.21	1	CASC8	NA	NA	#N/A
rs4871015	8	128314516	8q24.21	1	CASC8	NA	NA	#N/A
rs283705	8	128317450	8q24.21	2	CASC8; -	NA	NA	#N/A
rs11781932	8	128330178	8q24.21	1	CASC8	NA	NA	#N/A
rs7002712	8	128341612	8q24.21	2	CASC8; -	NA	NA	#N/A
rs7838714	8	128343948	8q24.21	1	CASC8	NA	NA	#N/A
rs17465052	8	128354080	8q24.21	3	CASC8; RP11-382A18.2; -	NA	NA	#N/A
rs10098985	8	128355019	8q24.21	3	CASC8; RP11-382A18.2; -	NA	NA	#N/A
rs10097200	8	128363652	8q24.21	2	CASC8; RP11-382A18.2	NA	NA	#N/A
rs7002826	8	128364271	8q24.21	2	CASC8; RP11-382A18.2	NA	NA	#N/A
rs7007568	8	128364906	8q24.21	3	CASC8; RP11-382A18.2; -	NA	NA	#N/A
rs7842494	8	128366570	8q24.21	2	CASC8; RP11-382A18.2	NA	NA	#N/A
rs5022926	8	128366829	8q24.21	2	CASC8; RP11-382A18.2	NA	NA	#N/A
rs9297753	8	128375270	8q24.21	2	CASC8; RP11-382A18.2	NA	NA	#N/A
rs9283954	8	128375370	8q24.21	2	CASC8; RP11-382A18.2	NA	NA	#N/A
rs7831303	8	128376732	8q24.21	3	CASC8; RP11-382A18.2; -	NA	NA	#N/A
rs7815100	8	128376801	8q24.21	3	CASC8; RP11-382A18.2; -	NA	NA	#N/A
rs6988647	8	128377656	8q24.21	3	CASC8; RP11-382A18.2; -	NA	NA	#N/A
rs9692890	8	128377774	8q24.21	3	CASC8; RP11-382A18.2; -	NA	NA	#N/A
rs9693143	8	128378025	8q24.21	3	CASC8; RP11-382A18.2; -	NA	NA	#N/A
rs16902126	8	128382357	8q24.21	2	CASC8; RP11-382A18.2	NA	NA	#N/A
rs7815245	8	128383597	8q24.21	3	CASC8; RP11-382A18.2; -	NA	NA	#N/A
rs1562430	8	128387852	8q24.21	3	CASC8; RP11-382A18.2; -	NA	NA	#N/A
rs7015780	8	128389507	8q24.21	2	CASC8; RP11-382A18.2	NA	NA	#N/A
rs2052701	8	133731794	8q24.22	1	TMEM71	NA	NA	#N/A
rs180204	8	133881244	8q24.22	1	TG	NA	NA	#N/A
rs2247583	8	14604752	8p22	1	SGCZ	NA	NA	#N/A
rs4733347	8	32376010	8p12	1	NRG1	NA	NA	#N/A
rs1108144	8	96404286	8q22.1	1	KB-1047C11.2	NA	NA	#N/A
rs11778211	8	96407360	8q22.1	1	KB-1047C11.2	NA	NA	#N/A

## Sheet: Table S6 mQTL
SNP	chr	position	cytoband	n_annotated_genes	Annotated_SYMBOL_coll	Estimate_mQTL_coll	distance_coll	Regulatory_Feature_Group_coll	chr_mQTL_coll	type_mQTL_coll	mQTL_Gene_coll	n_mQTLs
rs12782552	10	21428541	10p12.31	2	C10orf113; NEBL	NA	NA	NA	NA	NA	NA	#N/A
rs661893	10	30895478	10p11.23	1	-	0.435137710511393	-47		chr10	cis	LYZL2	#N/A
rs793088	10	31364621	10p11.22	1	-	0.452763828985813	-58052	Promoter_Associated	chr10	cis		1
rs793094	10	31386822	10p11.22	1	-	0.599319849732446	-35851	Promoter_Associated	chr10	cis		1
rs12415110	10	37096338	10p11.21	1	-	NA	NA	NA	NA	NA	NA	#N/A
rs2050502	10	44203201	10q11.21	1	-	-0.439163649196232	-195389		chr10	cis	RP11-168P8.5	1
rs12258494	10	44233503	10q11.21	1	TCEB1P30	-0.792427702893348; 0.572908784810742; -0.622718377247982	96089; 9569; -165087	; ;	chr10; chr10; chr10	cis; cis; cis	ZNF32-AS3// // RP11-168P8.5	3
rs4080021	10	44268654	10q11.21	1	RP11-272J7.4	-0.633185079558226; 0.575675102080321; -0.829853561583069	-129936; 44720; 131240	; ;	chr10; chr10; chr10	cis; cis; cis	RP11-168P8.5// // ZNF32-AS3	3
rs12776000	10	60576687	10q21.1	2	BICC1; -	NA	NA	NA	NA	NA	NA	#N/A
rs3912390	10	82776591	10q23.1	1	-	NA	NA	NA	NA	NA	NA	#N/A
rs1398312	11	106279611	11q22.3	1	-	NA	NA	NA	NA	NA	NA	#N/A
rs6656346	1	111103688	1p13.3	1	-	NA	NA	NA	NA	NA	NA	#N/A
rs12136952	1	12661421	1p36.22	2	DHRS3; -	NA	NA	NA	NA	NA	NA	#N/A
chr1_145556986_C_T	1	145556986	1q21.1	2	ANKRD35; -	NA	NA	NA	NA	NA	NA	#N/A
chr1_145740514_C_T	1	145740514	1q21.1	1	PDZK1	NA	NA	NA	NA	NA	NA	#N/A
chr1_150902203_A_T	1	150902203	1q21.3	1	SETDB1	0.532387359328853	349386	Unclassified	chr1	cis	MCL1;MCL1;MCL1	1
chr1_150974311_A_G	1	150974311	1q21.3	1	FAM63A	0.536847032132827	421494	Unclassified	chr1	cis	MCL1;MCL1;MCL1	1
rs6697813	1	15951743	1p36.21	1	DDI2	0.209886623604493; 0.285139148659638; 0.39520513915635; 0.425847982564419	40018; 40041; 20982; 101326	Promoter_Associated; Promoter_Associated; ;	chr1; chr1; chr1; chr1	cis; cis; cis; cis	AGMAT;DNAJC16// AGMAT;DNAJC16// CHCHD2P6;RP4-680D5.2// CASP9;CASP9;CASP9;CASP9;CASP9	4
rs2250174	1	160950966	1q23.3	1	-	-1.87584441681684; 0.36722003922657	-73816; -57161	Gene_Associated_Cell_type_specific; Promoter_Associated	chr1; chr1	cis; cis	ARHGAP30;ARHGAP30;ARHGAP30// TSTD1;TSTD1;TSTD1;F11R;F11R;F11R	2
chr11_68446868_A_G	11	68446868	11q13.3	1	GAL	NA	NA	NA	NA	NA	NA	#N/A
rs10798348	1	175194390	1q25.1	1	-	NA	NA	NA	NA	NA	NA	#N/A
rs4652490	1	180217250	1q25.2	2	LHX4; -	-0.268191384323198; 0.614542538997663	-1687; 16111	;	chr1; chr1	cis; cis	// LHX4	2
rs4465241	1	199963622	1q32.1	1	-	NA	NA	NA	NA	NA	NA	#N/A
rs3790840	1	200016460	1q32.1	1	NR5A2	NA	NA	NA	NA	NA	NA	#N/A
rs12145049	1	203777741	1q32.1	2	ZC3H11A; RP11-397P13.6	NA	NA	NA	NA	NA	NA	#N/A
rs17016036	1	210537248	1q32.2	1	HHAT	0.63488173464814; 0.326454856340259	-10708; -10620	Unclassified; Unclassified	chr1; chr1	cis; cis	RNU5A-8P;HHAT;HHAT// RNU5A-8P;HHAT;HHAT	2
rs4767014	12	113264755	12q24.13	1	RPH3A	NA	NA	NA	NA	NA	NA	#N/A
rs6560884	12	133142411	12q24.33	1	FBRSL1	NA	NA	NA	NA	NA	NA	#N/A
chr12_133155424_A_G	12	133155424	12q24.33	1	FBRSL1	0.336851725567256; 0.180943596511328; 0.995218866027111; 0.360902196957692; 0.793505738364037	17945; -4328; -10156; -10033; 22442	Promoter_Associated; ; ; ;	chr12; chr12; chr12; chr12; chr12	cis; cis; cis; cis; cis	FBRSL1;FBRSL1;FBRSL1// // // //	5
rs11118832	1	221884371	1q41	1	DUSP10	NA	NA	NA	NA	NA	NA	#N/A
rs10784548	12	40762546	12q12	1	LRRK2	-0.145176171329677	-72085176		chr11	trans	U7;NCAM1;NCAM1;NCAM1;NCAM1;NCAM1;NCAM1;NCAM1;NCAM1;NCAM1;NCAM1;NCAM1	1
rs3759125	12	50343608	12q13.12	3	AQP2; RP11-469H8.6; RP11-469H8.8	NA	NA	NA	NA	NA	NA	#N/A
rs9783504	12	821451	12p13.33	1	-	0.392550671713799	-4467		chr12	cis		1
rs7315904	12	835074	12p13.33	1	-	0.415742613816511	9156		chr12	cis		1
rs249184	12	95340146	12q22	2	NDUFA12; -	NA	NA	NA	NA	NA	NA	#N/A
rs9645898	13	101677816	13q32.3	1	NALCN-AS1	NA	NA	NA	NA	NA	NA	#N/A
rs9557954	13	103576386	13q33.1	1	-	NA	NA	NA	NA	NA	NA	#N/A
rs7325781	13	36080730	13q13.3	1	NBEA	NA	NA	NA	NA	NA	NA	#N/A
rs1461962	13	36081790	13q13.3	1	NBEA	NA	NA	NA	NA	NA	NA	#N/A
rs940595	15	24038267	15q11.2	1	-	NA	NA	NA	NA	NA	NA	#N/A
rs4782165	16	14551039	16p13.12	3	PARN; AC092291.1; -	NA	NA	NA	NA	NA	NA	#N/A
rs209451	16	22845744	16p12.2	1	HS3ST2	NA	NA	NA	NA	NA	NA	#N/A
rs7206380	16	79471714	16q23.2	1	-	NA	NA	NA	NA	NA	NA	#N/A
chr17_143542_A_G	17	143542	17p13.3	2	RPH3AL; -	NA	NA	NA	NA	NA	NA	#N/A
chr17_36895206_A_G	17	36895206	17q12	2	PCGF2; CISD3	NA	NA	NA	NA	NA	NA	#N/A
rs67892803	17	46088729	17q21.32	1	-	0.455669994713617; -0.262616235979385; 0.320748954112495; 0.523126352587429	40528; 40548; 40602; -25891	Promoter_Associated; Promoter_Associated; Promoter_Associated; Unclassified	chr17; chr17; chr17; chr17	cis; cis; cis; cis	CDK5RAP3// CDK5RAP3// CDK5RAP3// MIR152	4
rs11654719	17	64340380	17q24.2	1	PRKCA	0.346045645390782	-7008		chr17	cis		1
chr17_69121396_A_G	17	69121396	17q24.3	1	CASC17	NA	NA	NA	NA	NA	NA	#N/A
chr17_69124724_C_T	17	69124724	17q24.3	1	CASC17	NA	NA	NA	NA	NA	NA	#N/A
rs7214041	17	70401476	17q24.3	2	LINC00511; -	NA	NA	NA	NA	NA	NA	#N/A
rs67284056	18	30696277	18q12.1	1	CCDC178	NA	NA	NA	NA	NA	NA	#N/A
rs34871003	18	30842257	18q12.1	1	CCDC178	NA	NA	NA	NA	NA	NA	#N/A
rs12402858	1	87845112	1p22.3	1	-	NA	NA	NA	NA	NA	NA	#N/A
chr1_87859293_C_G	1	87859293	1p22.3	1	-	NA	NA	NA	NA	NA	NA	#N/A
rs11081370	18	8241986	18p11.23	1	PTPRM	-0.268329508969424; 1.5365746214968	12028; 3302	;	chr18; chr18	cis; cis	//	2
rs773914	19	16859652	19p13.11	1	NWD1	NA	NA	NA	NA	NA	NA	#N/A
rs8111858	19	4326239	19p13.3	2	FSD1; STAP2	-0.241185419541572; -0.240583415131167; -0.248037400095613	-14322246; -3342; -12530	; Unclassified_Cell_type_specific;	chr19; chr19; chr19	trans; cis; cis	// // STAP2;STAP2	3
rs62209634	20	32456862	20q11.22	1	-	NA	NA	NA	NA	NA	NA	#N/A
rs6074037	20	44769666	20q13.12	1	-	-0.534463909786277	36353		chr20	cis		1
rs12625828	20	48844585	20q13.13	1	-	NA	NA	NA	NA	NA	NA	#N/A
rs2232073	20	6065731	20p12.3	1	FERMT1	NA	NA	NA	NA	NA	NA	#N/A
rs4383344	2	120278171	2q14.2	1	SCTR	-1.25879245212942	2085		chr2	cis		1
rs13408950	2	14682175	2p24.3	1	-	NA	NA	NA	NA	NA	NA	#N/A
rs34501967	2	174869889	2q31.1	1	-	-0.94962586583384	75950		chr2	cis		1
rs35463408	2	175619948	2q31.1	2	CHRNA1; AC018890.6	NA	NA	NA	NA	NA	NA	#N/A
rs2873308	2	236566346	2q37.2	1	AGAP1	NA	NA	NA	NA	NA	NA	#N/A
rs6730757	2	43541598	2p21	1	THADA	NA	NA	NA	NA	NA	NA	#N/A
rs11720514	3	112113334	3q13.2	1	RP11-231E6.1	-0.237503259098682	-17248		chr3	cis		1
rs999802	3	112127280	3q13.2	2	RP11-231E6.1; -	NA	NA	NA	NA	NA	NA	#N/A
rs1683813	3	128666029	3q21.3	2	RP11-723O4.6; KIAA1257	-0.374872757270504	5096		chr3	cis		1
chr3_177443968_A_C	3	177443968	3q26.32	1	LINC00578	NA	NA	NA	NA	NA	NA	#N/A
chr3_183881234_A_G	3	183881234	3q27.1	2	DVL3; EIF2B5	-0.376766653379102	52742		chr3	cis		1
rs12152217	3	183935258	3q27.1	1	EIF2B5	NA	NA	NA	NA	NA	NA	#N/A
rs11922997	3	34997498	3p22.3	1	-	NA	NA	NA	NA	NA	NA	#N/A
rs2584051	3	3842821	3p26.2	3	LRRN1; SUMF1; -	NA	NA	NA	NA	NA	NA	#N/A
rs7635135	3	66892025	3p14.1	1	-	-0.422321867068934; -0.428226055575042; -0.423634738139824	43346; 45976; 43297	; ;	chr3; chr3; chr3	cis; cis; cis	// //	3
chr4_125576612_C_T	4	125576612	4q28.1	1	-	NA	NA	NA	NA	NA	NA	#N/A
rs2391054	4	127343002	4q28.1	1	-	NA	NA	NA	NA	NA	NA	#N/A
rs2706822	4	168362952	4q32.3	1	-	NA	NA	NA	NA	NA	NA	#N/A
rs11734697	4	181125964	4q34.3	1	-	NA	NA	NA	NA	NA	NA	#N/A
rs4689545	4	6767336	4p16.1	1	-	0.120437919096827	-53870640		chr14	trans	DHRS7;DHRS7;DHRS7	1
chr4_69266379_C_G	4	69266379	4q13.2	1	-	NA	NA	NA	NA	NA	NA	#N/A
rs10032900	4	7491757	4p16.1	1	SORCS2	0.420944211213645	18799		chr4	cis	SORCS2	1
rs6869928	5	10589502	5p15.2	1	ANKRD33B	NA	NA	NA	NA	NA	NA	#N/A
rs4702704	5	10591672	5p15.2	1	ANKRD33B	NA	NA	NA	NA	NA	NA	#N/A
rs2736098	5	1294086	5p15.33	2	TERT; -	0.548031307264886; -0.409344544859524	-31502; -3404	;	chr5; chr5	cis; cis	CLPTM1L;CLPTM1L;CLPTM1L;CLPTM1L;CLPTM1L;CLPTM1L;CLPTM1L;CLPTM1L;CLPTM1L//	2
rs10079348	5	1384607	5p15.33	1	RP11-325I22.2	NA	NA	NA	NA	NA	NA	#N/A
rs7717113	5	172781401	5q35.1	1	-	NA	NA	NA	NA	NA	NA	#N/A
rs16888572	5	21718946	5p14.3	1	RP11-804N13.1	NA	NA	NA	NA	NA	NA	#N/A
rs6453061	5	73771666	5q13.3	1	CTC-419K13.1	NA	NA	NA	NA	NA	NA	#N/A
rs12206846	6	108238917	6q21	2	SEC63; -	0.932378858828182	53742		chr6	cis		1
chr6_109038333_A_G	6	109038333	6q21	1	-	NA	NA	NA	NA	NA	NA	#N/A
rs74969259	6	23504700	6p22.3	1	-	NA	NA	NA	NA	NA	NA	#N/A
rs761098	6	2449186	6p25.2	2	GMDS-AS1; -	NA	NA	NA	NA	NA	NA	#N/A
rs12524673	6	25432769	6p22.2	3	LRRC16A; snoU13; -	-0.769431345673071; 0.28070863968616	101194; -53847	;	chr6; chr6	cis; cis	LRRC16A;LRRC16A//	2
rs9261418	6	30076660	6p22.1	2	TRIM31; TRIM31-AS1	-0.625384596450317; -1.2464449636346; -1.25483975472429	-3570; 1; 177909	; ;	chr6; chr6; chr6	cis; cis short_distance; cis	TRIM31;TRIM31;TRIM31;TRIM31;TRIM31;TRIM31-AS1;TRIM31// TRIM31;TRIM31;TRIM31;TRIM31;TRIM31;TRIM31-AS1//	2
chr6_41354653_C_T	6	41354653	6p21.1	1	-	NA	NA	NA	NA	NA	NA	#N/A
chr6_41354872_A_C	6	41354872	6p21.1	1	-	NA	NA	NA	NA	NA	NA	#N/A
chr6_41362013_G_T	6	41362013	6p21.1	1	-	NA	NA	NA	NA	NA	NA	#N/A
rs4706458	6	71382765	6q13	1	SMAP1	NA	NA	NA	NA	NA	NA	#N/A
rs2504748	6	71583804	6q13	1	B3GAT2	NA	NA	NA	NA	NA	NA	#N/A
rs2647417	6	76435943	6q14.1	1	-	NA	NA	NA	NA	NA	NA	#N/A
kgp3489492	7	102807820	7q22.1	1	-	NA	NA	NA	NA	NA	NA	#N/A
rs62482372	7	102924512	7q22.1	1	DPY19L2P2	NA	NA	NA	NA	NA	NA	#N/A
chr7_130488534_C_T	7	130488534	7q32.3	1	-	NA	NA	NA	NA	NA	NA	#N/A
rs8175950	7	142661695	7q34	2	KEL; -	0.385735648899593	-62679		chr7	cis	OR9A2	1
rs6957979	7	36982483	7p14.2	1	ELMO1	NA	NA	NA	NA	NA	NA	#N/A
chr7_47538546_C_T	7	47538546	7p12.3	1	TNS3	0.415619710936782	-2997		chr7	cis	TNS3;TNS3;TNS3	1
chr7_587783_C_G	7	587783	7p22.3	2	PRKAR1B; AC147651.2	0.238494937889617	-24830		chr7	cis		1
rs3801714	7	81830424	7q21.11	1	CACNA2D1	NA	NA	NA	NA	NA	NA	#N/A
rs12549518	8	128309591	8q24.21	2	CASC8; RP11-382A18.3	0.691647952742824	-3907		chr8	cis	RP11-382A18.1;RP11-382A18.1;RP11-382A18.1	1
rs6996866	8	128310155	8q24.21	1	CASC8	0.691647952742824	-3343		chr8	cis	RP11-382A18.1;RP11-382A18.1;RP11-382A18.1	1
rs283727	8	128313360	8q24.21	1	CASC8	-0.83693208043448	-138		chr8	cis	RP11-382A18.1;RP11-382A18.1;RP11-382A18.1	1
rs283728	8	128313500	8q24.21	1	CASC8	-0.837475585634644	2		chr8	cis short_distance	RP11-382A18.1;RP11-382A18.1;RP11-382A18.1	#N/A
rs4871015	8	128314516	8q24.21	1	CASC8	0.697780165274328	1018		chr8	cis	RP11-382A18.1;RP11-382A18.1;RP11-382A18.1	1
rs283705	8	128317450	8q24.21	2	CASC8; -	-0.667409722289742; -0.169639989382246	3952; -33051	;	chr8; chr8	cis; cis	RP11-382A18.1;RP11-382A18.1;RP11-382A18.1// RP11-382A18.2;RP11-382A18.1;RP11-382A18.1;RP11-382A18.1	2
rs11781932	8	128330178	8q24.21	1	CASC8	0.727769252182847	16680		chr8	cis	RP11-382A18.1;RP11-382A18.1;RP11-382A18.1	1
rs7002712	8	128341612	8q24.21	2	CASC8; -	0.693673358120098	28114		chr8	cis	RP11-382A18.1;RP11-382A18.1;RP11-382A18.1	1
rs7838714	8	128343948	8q24.21	1	CASC8	0.58862315069855; 0.215024339364103	30450; -6553	;	chr8; chr8	cis; cis	RP11-382A18.1;RP11-382A18.1;RP11-382A18.1// RP11-382A18.2;RP11-382A18.1;RP11-382A18.1;RP11-382A18.1	2
rs17465052	8	128354080	8q24.21	3	CASC8; RP11-382A18.2; -	0.215646326974146; 0.593391438516453	3579; 40582	;	chr8; chr8	cis; cis	RP11-382A18.2;RP11-382A18.1;RP11-382A18.1;RP11-382A18.1// RP11-382A18.1;RP11-382A18.1;RP11-382A18.1	2
rs10098985	8	128355019	8q24.21	3	CASC8; RP11-382A18.2; -	0.212436254989342; 0.599505434458106	4518; 41521	;	chr8; chr8	cis; cis	RP11-382A18.2;RP11-382A18.1;RP11-382A18.1;RP11-382A18.1// RP11-382A18.1;RP11-382A18.1;RP11-382A18.1	2
rs10097200	8	128363652	8q24.21	2	CASC8; RP11-382A18.2	0.55690507378661; 0.208256192661266	50154; 13151	;	chr8; chr8	cis; cis	RP11-382A18.1;RP11-382A18.1;RP11-382A18.1// RP11-382A18.2;RP11-382A18.1;RP11-382A18.1;RP11-382A18.1	2
rs7002826	8	128364271	8q24.21	2	CASC8; RP11-382A18.2	0.199604050604366; 0.57511112965117	13770; 50773	;	chr8; chr8	cis; cis	RP11-382A18.2;RP11-382A18.1;RP11-382A18.1;RP11-382A18.1// RP11-382A18.1;RP11-382A18.1;RP11-382A18.1	2
rs7007568	8	128364906	8q24.21	3	CASC8; RP11-382A18.2; -	0.204968915199687; 0.580983253109992	14405; 51408	;	chr8; chr8	cis; cis	RP11-382A18.2;RP11-382A18.1;RP11-382A18.1;RP11-382A18.1// RP11-382A18.1;RP11-382A18.1;RP11-382A18.1	2
rs7842494	8	128366570	8q24.21	2	CASC8; RP11-382A18.2	0.610161432535721; 0.189822224971075	53072; 16069	;	chr8; chr8	cis; cis	RP11-382A18.1;RP11-382A18.1;RP11-382A18.1// RP11-382A18.2;RP11-382A18.1;RP11-382A18.1;RP11-382A18.1	2
rs5022926	8	128366829	8q24.21	2	CASC8; RP11-382A18.2	0.198704701807374; 0.57266204383509	16328; 53331	;	chr8; chr8	cis; cis	RP11-382A18.2;RP11-382A18.1;RP11-382A18.1;RP11-382A18.1// RP11-382A18.1;RP11-382A18.1;RP11-382A18.1	2
rs9297753	8	128375270	8q24.21	2	CASC8; RP11-382A18.2	0.57266204383509; 0.198704701807374	61772; 24769	;	chr8; chr8	cis; cis	RP11-382A18.1;RP11-382A18.1;RP11-382A18.1// RP11-382A18.2;RP11-382A18.1;RP11-382A18.1;RP11-382A18.1	2
rs9283954	8	128375370	8q24.21	2	CASC8; RP11-382A18.2	0.189822224971075; 0.610161432535721	24869; 61872	;	chr8; chr8	cis; cis	RP11-382A18.2;RP11-382A18.1;RP11-382A18.1;RP11-382A18.1// RP11-382A18.1;RP11-382A18.1;RP11-382A18.1	2
rs7831303	8	128376732	8q24.21	3	CASC8; RP11-382A18.2; -	0.57266204383509; 0.198704701807374	63234; 26231	;	chr8; chr8	cis; cis	RP11-382A18.1;RP11-382A18.1;RP11-382A18.1// RP11-382A18.2;RP11-382A18.1;RP11-382A18.1;RP11-382A18.1	2
rs7815100	8	128376801	8q24.21	3	CASC8; RP11-382A18.2; -	0.198704701807374; 0.57266204383509	26300; 63303	;	chr8; chr8	cis; cis	RP11-382A18.2;RP11-382A18.1;RP11-382A18.1;RP11-382A18.1// RP11-382A18.1;RP11-382A18.1;RP11-382A18.1	2
rs6988647	8	128377656	8q24.21	3	CASC8; RP11-382A18.2; -	0.57266204383509; 0.198704701807374	64158; 27155	;	chr8; chr8	cis; cis	RP11-382A18.1;RP11-382A18.1;RP11-382A18.1// RP11-382A18.2;RP11-382A18.1;RP11-382A18.1;RP11-382A18.1	2
rs9692890	8	128377774	8q24.21	3	CASC8; RP11-382A18.2; -	0.610161432535721; 0.189822224971075	64276; 27273	;	chr8; chr8	cis; cis	RP11-382A18.1;RP11-382A18.1;RP11-382A18.1// RP11-382A18.2;RP11-382A18.1;RP11-382A18.1;RP11-382A18.1	2
rs9693143	8	128378025	8q24.21	3	CASC8; RP11-382A18.2; -	0.198704701807374; 0.57266204383509	27524; 64527	;	chr8; chr8	cis; cis	RP11-382A18.2;RP11-382A18.1;RP11-382A18.1;RP11-382A18.1// RP11-382A18.1;RP11-382A18.1;RP11-382A18.1	2
rs16902126	8	128382357	8q24.21	2	CASC8; RP11-382A18.2	0.209540329391019; 0.541194794063895	31856; 68859	;	chr8; chr8	cis; cis	RP11-382A18.2;RP11-382A18.1;RP11-382A18.1;RP11-382A18.1// RP11-382A18.1;RP11-382A18.1;RP11-382A18.1	2
rs7815245	8	128383597	8q24.21	3	CASC8; RP11-382A18.2; -	0.569782695551534; 0.196982568378313	70099; 33096	;	chr8; chr8	cis; cis	RP11-382A18.1;RP11-382A18.1;RP11-382A18.1// RP11-382A18.2;RP11-382A18.1;RP11-382A18.1;RP11-382A18.1	2
rs1562430	8	128387852	8q24.21	3	CASC8; RP11-382A18.2; -	0.194698899739135; 0.568412217011741	37351; 74354	;	chr8; chr8	cis; cis	RP11-382A18.2;RP11-382A18.1;RP11-382A18.1;RP11-382A18.1// RP11-382A18.1;RP11-382A18.1;RP11-382A18.1	2
rs7015780	8	128389507	8q24.21	2	CASC8; RP11-382A18.2	0.198977621445823; 0.561209336616776	39006; 76009	;	chr8; chr8	cis; cis	RP11-382A18.2;RP11-382A18.1;RP11-382A18.1;RP11-382A18.1// RP11-382A18.1;RP11-382A18.1;RP11-382A18.1	2
rs2052701	8	133731794	8q24.22	1	TMEM71	-2.41226807969314	17025		chr8	cis	TMEM71	1
rs180204	8	133881244	8q24.22	1	TG	-1.31852780348627	166475		chr8	cis	TMEM71	1
rs2247583	8	14604752	8p22	1	SGCZ	NA	NA	NA	NA	NA	NA	#N/A
rs4733347	8	32376010	8p12	1	NRG1	NA	NA	NA	NA	NA	NA	#N/A
rs1108144	8	96404286	8q22.1	1	KB-1047C11.2	NA	NA	NA	NA	NA	NA	#N/A
rs11778211	8	96407360	8q22.1	1	KB-1047C11.2	NA	NA	NA	NA	NA	NA	#N/A

## Sheet: Table S6 ci_enh
SNP	chr	position	cytoband	n_annotated_genes	Annotated_SYMBOL_coll	reg_region_enh	type_enh	SYMBOL_enh_gene_link_chrstate7_coll	pos_rel_TSS_coll	pred_conf_score_coll	enh_DE_SYMBOL_coll	slope_GTEx_nominal_coll	pval_nominal_GTEx_nominal_coll	SYMBOL_GTEx_nominal_coll
rs12782552	10	21428541	10p12.31	2	C10orf113; NEBL	#N/A	#N/A	#N/A	#N/A	#N/A	#N/A	-0.396165	0.044097	NEBL-AS1
rs661893	10	30895478	10p11.23	1	-	#N/A	#N/A	#N/A	#N/A	#N/A	#N/A	0.132142	0.0242453	ZEB1-AS1
rs793088	10	31364621	10p11.22	1	-	#N/A	#N/A	#N/A	#N/A	#N/A	#N/A	-0.178191	0.0433164	RP11-330O11.3
rs793094	10	31386822	10p11.22	1	-	#N/A	#N/A	#N/A	#N/A	#N/A	#N/A	-0.190316	0.0218876	RP11-330O11.3
rs12415110	10	37096338	10p11.21	1	-	#N/A	#N/A	#N/A	#N/A	#N/A	#N/A	#N/A	#N/A	#N/A
rs2050502	10	44203201	10q11.21	1	-	#N/A	#N/A	#N/A	#N/A	#N/A	#N/A	#N/A	#N/A	#N/A
rs12258494	10	44233503	10q11.21	1	TCEB1P30	#N/A	#N/A	#N/A	#N/A	#N/A	#N/A	0.169657	0.0472754	BMS1
rs4080021	10	44268654	10q11.21	1	RP11-272J7.4	#N/A	#N/A	#N/A	#N/A	#N/A	#N/A	#N/A	#N/A	#N/A
rs12776000	10	60576687	10q21.1	2	BICC1; -	#N/A	#N/A	#N/A	#N/A	#N/A	#N/A	-0.213088	0.0346977	BICC1
rs3912390	10	82776591	10q23.1	1	-	#N/A	#N/A	#N/A	#N/A	#N/A	#N/A	-0.196913	0.0234882	TMEM254-AS1
rs1398312	11	106279611	11q22.3	1	-	#N/A	#N/A	#N/A	#N/A	#N/A	#N/A	0.20602	0.0148482	RP11-680E19.2
rs6656346	1	111103688	1p13.3	1	-	#N/A	#N/A	#N/A	#N/A	#N/A	#N/A	0.223503	0.0360166	LAMTOR5-AS1
rs12136952	1	12661421	1p36.22	2	DHRS3; -	chr1:12661326-12661719	enh	DHRS3; DHRS3; DHRS3	16400; 16200; 16000	21.63; 16.572; 14.103	DHRS3; DHRS3; DHRS3	-0.118783; -0.146148; 0.135773	0.0368941; 0.00671962; 0.016407	CLCN6; VPS13D; PLOD1
chr1_145556986_C_T	1	145556986	1q21.1	2	ANKRD35; -	#N/A	#N/A	#N/A	#N/A	#N/A	#N/A	0.233406; -0.205154	0.00682418; 0.019326	NUDT17; RP11-315I20.1
chr1_145740514_C_T	1	145740514	1q21.1	1	PDZK1	#N/A	#N/A	#N/A	#N/A	#N/A	#N/A	-0.398514	0.0382597	RP4-704D21.2
chr1_150902203_A_T	1	150902203	1q21.3	1	SETDB1	#N/A	#N/A	#N/A	#N/A	#N/A	#N/A	-0.3025; 0.342843; -0.285104; 0.304419; -0.422044	0.0229325; 0.00837526; 0.0464014; 0.000419314; 0.00424313	SNX27; CTSK; SEMA6C; CTSS; THEM5
chr1_150974311_A_G	1	150974311	1q21.3	1	FAM63A	#N/A	#N/A	#N/A	#N/A	#N/A	#N/A	-0.276876; 0.243015; 0.304449; -0.270362	0.0202822; 0.0379431; 7.84886e-05; 0.042314	SNX27; CTSK; CTSS; THEM5
rs6697813	1	15951743	1p36.21	1	DDI2	#N/A	#N/A	#N/A	#N/A	#N/A	#N/A	-0.366437; 0.116805; -0.18664	0.000136362; 0.0238815; 0.0398915	AGMAT; PLEKHM2; FLJ37453
rs2250174	1	160950966	1q23.3	1	-	#N/A	#N/A	#N/A	#N/A	#N/A	#N/A	0.142693; 0.174264; 0.0933966; 0.226521; 0.19541	0.00940962; 0.032085; 0.0279211; 0.036834; 0.0402333	DCAF8; ADAMTS4; ARHGAP30; LOC729867; RP11-122G18.5
chr11_68446868_A_G	11	68446868	11q13.3	1	GAL	#N/A	#N/A	#N/A	#N/A	#N/A	#N/A	#N/A	#N/A	#N/A
rs10798348	1	175194390	1q25.1	1	-	#N/A	#N/A	#N/A	#N/A	#N/A	#N/A	#N/A	#N/A	#N/A
rs4652490	1	180217250	1q25.2	2	LHX4; -	#N/A	#N/A	#N/A	#N/A	#N/A	#N/A	0.187145	0.00656616	QSOX1
rs4465241	1	199963622	1q32.1	1	-	#N/A	#N/A	#N/A	#N/A	#N/A	#N/A	0.176893; 0.238199	0.025761; 0.0276476	DDX59; MROH3P
rs3790840	1	200016460	1q32.1	1	NR5A2	#N/A	#N/A	#N/A	#N/A	#N/A	#N/A	-0.156126; -0.22465	0.0466275; 0.0211443	DDX59; LINC00862
rs12145049	1	203777741	1q32.1	2	ZC3H11A; RP11-397P13.6	#N/A	#N/A	#N/A	#N/A	#N/A	#N/A	-0.187272	0.0495383	ADORA1
rs17016036	1	210537248	1q32.2	1	HHAT	#N/A	#N/A	#N/A	#N/A	#N/A	#N/A	-0.230937; 0.121986	0.00751283; 0.0266285	TRAF3IP3; DIEXF
rs4767014	12	113264755	12q24.13	1	RPH3A	#N/A	#N/A	#N/A	#N/A	#N/A	#N/A	0.175808	0.049247	RASAL1
rs6560884	12	133142411	12q24.33	1	FBRSL1	#N/A	#N/A	#N/A	#N/A	#N/A	#N/A	-0.653455; 0.345698	1.40069e-21; 0.00428329	FBRSL1; LOC100996246
chr12_133155424_A_G	12	133155424	12q24.33	1	FBRSL1	#N/A	#N/A	#N/A	#N/A	#N/A	#N/A	-0.171915; -0.190552; 0.245053	0.00597463; 0.0489866; 0.0136421	FBRSL1; RP11-46H11.3; LOC100996246
rs11118832	1	221884371	1q41	1	DUSP10	#N/A	#N/A	#N/A	#N/A	#N/A	#N/A	0.199904; 0.314665	0.0369355; 0.0365105	MARC2; RP11-378J18.6
rs10784548	12	40762546	12q12	1	LRRK2	#N/A	#N/A	#N/A	#N/A	#N/A	#N/A	#N/A	#N/A	#N/A
rs3759125	12	50343608	12q13.12	3	AQP2; RP11-469H8.6; RP11-469H8.8	#N/A	#N/A	#N/A	#N/A	#N/A	#N/A	0.0912296; -0.205723	0.0187056; 0.0136254	LMBR1L; AQP5
rs9783504	12	821451	12p13.33	1	-	#N/A	#N/A	#N/A	#N/A	#N/A	#N/A	#N/A	#N/A	#N/A
rs7315904	12	835074	12p13.33	1	-	#N/A	#N/A	#N/A	#N/A	#N/A	#N/A	#N/A	#N/A	#N/A
rs249184	12	95340146	12q22	2	NDUFA12; -	#N/A	#N/A	#N/A	#N/A	#N/A	#N/A	#N/A	#N/A	#N/A
rs9645898	13	101677816	13q32.3	1	NALCN-AS1	#N/A	#N/A	#N/A	#N/A	#N/A	#N/A	#N/A	#N/A	#N/A
rs9557954	13	103576386	13q33.1	1	-	#N/A	#N/A	#N/A	#N/A	#N/A	#N/A	0.19542	0.00894509	FGF14-AS2
rs7325781	13	36080730	13q13.3	1	NBEA	#N/A	#N/A	#N/A	#N/A	#N/A	#N/A	#N/A	#N/A	#N/A
rs1461962	13	36081790	13q13.3	1	NBEA	#N/A	#N/A	#N/A	#N/A	#N/A	#N/A	#N/A	#N/A	#N/A
rs940595	15	24038267	15q11.2	1	-	#N/A	#N/A	#N/A	#N/A	#N/A	#N/A	-0.214874	0.011827	RP11-580I1.2
rs4782165	16	14551039	16p13.12	3	PARN; AC092291.1; -	#N/A	#N/A	#N/A	#N/A	#N/A	#N/A	-0.228138; 0.193961	0.00645532; 0.00528189	NOMO1; PARN
rs209451	16	22845744	16p12.2	1	HS3ST2	#N/A	#N/A	#N/A	#N/A	#N/A	#N/A	-0.147113; -0.17821; -0.171611	0.0252831; 0.00233665; 0.0219916	EEF2K; UBFD1; CDR2
rs7206380	16	79471714	16q23.2	1	-	#N/A	#N/A	#N/A	#N/A	#N/A	#N/A	#N/A	#N/A	#N/A
chr17_143542_A_G	17	143542	17p13.3	2	RPH3AL; -	#N/A	#N/A	#N/A	#N/A	#N/A	#N/A	0.20451	0.0165189	FAM101B
chr17_36895206_A_G	17	36895206	17q12	2	PCGF2; CISD3	#N/A	#N/A	#N/A	#N/A	#N/A	#N/A	0.219994; 0.17257; -0.202183	0.00940108; 0.0271345; 0.0140367	SYNRG; RP11-1407O15.2; TBC1D3F
rs67892803	17	46088729	17q21.32	1	-	#N/A	#N/A	#N/A	#N/A	#N/A	#N/A	0.183935; 0.132872; -0.221119; -0.214231; -0.142745; 0.255643; 0.215714; 0.254119	0.00656867; 0.00386763; 0.00552021; 0.00424051; 0.0243438; 0.000107027; 0.0215505; 0.00832167	PNPO; CDK5RAP3; SKAP1; SCRN2; SP2; PRR15L; RP11-6N17.10; RP11-6N17.3
rs11654719	17	64340380	17q24.2	1	PRKCA	#N/A	#N/A	#N/A	#N/A	#N/A	#N/A	#N/A	#N/A	#N/A
chr17_69121396_A_G	17	69121396	17q24.3	1	CASC17	#N/A	#N/A	#N/A	#N/A	#N/A	#N/A	-0.485014	0.00483001	RP11-84E24.2
chr17_69124724_C_T	17	69124724	17q24.3	1	CASC17	#N/A	#N/A	#N/A	#N/A	#N/A	#N/A	-0.485014	0.00483001	RP11-84E24.2
rs7214041	17	70401476	17q24.3	2	LINC00511; -	#N/A	#N/A	#N/A	#N/A	#N/A	#N/A	0.322243	0.0103494	LOC101928205
rs67284056	18	30696277	18q12.1	1	CCDC178	#N/A	#N/A	#N/A	#N/A	#N/A	#N/A	#N/A	#N/A	#N/A
rs34871003	18	30842257	18q12.1	1	CCDC178	#N/A	#N/A	#N/A	#N/A	#N/A	#N/A	#N/A	#N/A	#N/A
rs12402858	1	87845112	1p22.3	1	-	#N/A	#N/A	#N/A	#N/A	#N/A	#N/A	#N/A	#N/A	#N/A
chr1_87859293_C_G	1	87859293	1p22.3	1	-	#N/A	#N/A	#N/A	#N/A	#N/A	#N/A	0.187174	0.00405271	HS2ST1
rs11081370	18	8241986	18p11.23	1	PTPRM	#N/A	#N/A	#N/A	#N/A	#N/A	#N/A	#N/A	#N/A	#N/A
rs773914	19	16859652	19p13.11	1	NWD1	#N/A	#N/A	#N/A	#N/A	#N/A	#N/A	-0.204548; -0.26436; 0.287807; -0.188519; -0.36224	0.0438583; 0.0337636; 0.0252722; 0.0417997; 0.0444176	FAM32A; EPS15L1; BST2; PGLS; CTC-429P9.5
rs8111858	19	4326239	19p13.3	2	FSD1; STAP2	#N/A	#N/A	#N/A	#N/A	#N/A	#N/A	-0.0986879; 0.281827; -0.137682; -0.111348	0.0219684; 8.5625e-06; 0.0384269; 0.0382478	LRG1; STAP2; C19orf71; PLIN5
rs62209634	20	32456862	20q11.22	1	-	#N/A	#N/A	#N/A	#N/A	#N/A	#N/A	0.322228; -0.14293; -0.156537	0.00446382; 0.0102194; 0.0196656	BPIFB2; CHMP4B; DYNLRB1
rs6074037	20	44769666	20q13.12	1	-	#N/A	#N/A	#N/A	#N/A	#N/A	#N/A	-0.185633; -0.130022; -0.200398; -0.278767	0.0210305; 0.0392569; 0.0306411; 0.00264566	EYA2; PLTP; WFDC3; ZNF840
rs12625828	20	48844585	20q13.13	1	-	#N/A	#N/A	#N/A	#N/A	#N/A	#N/A	-0.123509; -0.10825	0.0330605; 0.018227	KCNB1; B4GALT5
rs2232073	20	6065731	20p12.3	1	FERMT1	#N/A	#N/A	#N/A	#N/A	#N/A	#N/A	-0.290654; -0.213706	0.000809526; 0.0284688	LINC00654; RP5-1022P6.3
rs4383344	2	120278171	2q14.2	1	SCTR	#N/A	#N/A	#N/A	#N/A	#N/A	#N/A	0.193889	0.009642	INHBB
rs13408950	2	14682175	2p24.3	1	-	#N/A	#N/A	#N/A	#N/A	#N/A	#N/A	#N/A	#N/A	#N/A
rs34501967	2	174869889	2q31.1	1	-	#N/A	#N/A	#N/A	#N/A	#N/A	#N/A	#N/A	#N/A	#N/A
rs35463408	2	175619948	2q31.1	2	CHRNA1; AC018890.6	#N/A	#N/A	#N/A	#N/A	#N/A	#N/A	0.142547	0.0436904	ATP5G3
rs2873308	2	236566346	2q37.2	1	AGAP1	#N/A	#N/A	#N/A	#N/A	#N/A	#N/A	#N/A	#N/A	#N/A
rs6730757	2	43541598	2p21	1	THADA	#N/A	#N/A	#N/A	#N/A	#N/A	#N/A	0.106609; 0.190244; 0.175219	0.0446272; 0.00491111; 0.0330478	COX7A2L; PLEKHH2; C1GALT1C1L
rs11720514	3	112113334	3q13.2	1	RP11-231E6.1	#N/A	#N/A	#N/A	#N/A	#N/A	#N/A	0.139392; 0.210583; 0.160881	0.0326965; 0.0026243; 0.0280233	C3orf52; GCSAM; RP11-757F18.5
rs999802	3	112127280	3q13.2	2	RP11-231E6.1; -	#N/A	#N/A	#N/A	#N/A	#N/A	#N/A	-0.16957	0.0138464	GCSAM
rs1683813	3	128666029	3q21.3	2	RP11-723O4.6; KIAA1257	#N/A	#N/A	#N/A	#N/A	#N/A	#N/A	0.137429; 0.444714; 0.149007; 0.448913	0.0433503; 9.04038e-07; 0.0231586; 4.37994e-07	EEFSEC; LOC653712; RPL32P3; RP11-723O4.9
chr3_177443968_A_C	3	177443968	3q26.32	1	LINC00578	#N/A	#N/A	#N/A	#N/A	#N/A	#N/A	#N/A	#N/A	#N/A
chr3_183881234_A_G	3	183881234	3q27.1	2	DVL3; EIF2B5	#N/A	#N/A	#N/A	#N/A	#N/A	#N/A	-0.10059; 0.200486; -0.164421; -0.28691	0.02975; 0.0141124; 0.0102455; 0.0150002	EIF4G1; ABCF3; PSMD2; RP11-329B9.3
rs12152217	3	183935258	3q27.1	1	EIF2B5	#N/A	#N/A	#N/A	#N/A	#N/A	#N/A	-0.1137; 0.167504; 0.158595; -0.144966	0.0146982; 0.042584; 0.00896128; 0.025127	EIF4G1; ABCF3; CAMK2N2; PSMD2
rs11922997	3	34997498	3p22.3	1	-	#N/A	#N/A	#N/A	#N/A	#N/A	#N/A	#N/A	#N/A	#N/A
rs2584051	3	3842821	3p26.2	3	LRRN1; SUMF1; -	#N/A	#N/A	#N/A	#N/A	#N/A	#N/A	#N/A	#N/A	#N/A
rs7635135	3	66892025	3p14.1	1	-	#N/A	#N/A	#N/A	#N/A	#N/A	#N/A	#N/A	#N/A	#N/A
chr4_125576612_C_T	4	125576612	4q28.1	1	-	#N/A	#N/A	#N/A	#N/A	#N/A	#N/A	#N/A	#N/A	#N/A
rs2391054	4	127343002	4q28.1	1	-	#N/A	#N/A	#N/A	#N/A	#N/A	#N/A	#N/A	#N/A	#N/A
rs2706822	4	168362952	4q32.3	1	-	#N/A	#N/A	#N/A	#N/A	#N/A	#N/A	#N/A	#N/A	#N/A
rs11734697	4	181125964	4q34.3	1	-	#N/A	#N/A	#N/A	#N/A	#N/A	#N/A	#N/A	#N/A	#N/A
rs4689545	4	6767336	4p16.1	1	-	#N/A	#N/A	#N/A	#N/A	#N/A	#N/A	0.152133	0.0464229	RP11-367J11.3
chr4_69266379_C_G	4	69266379	4q13.2	1	-	#N/A	#N/A	#N/A	#N/A	#N/A	#N/A	-0.152664; -0.193253	0.0316037; 0.0325562	UGT2B7; RP11-468N14.13
rs10032900	4	7491757	4p16.1	1	SORCS2	#N/A	#N/A	#N/A	#N/A	#N/A	#N/A	0.131572	0.027039	MRFAP1L1
rs6869928	5	10589502	5p15.2	1	ANKRD33B	#N/A	#N/A	#N/A	#N/A	#N/A	#N/A	-0.220554	0.0169107	ANKRD33B
rs4702704	5	10591672	5p15.2	1	ANKRD33B	#N/A	#N/A	#N/A	#N/A	#N/A	#N/A	-0.13887	0.00340193	CMBL
rs2736098	5	1294086	5p15.33	2	TERT; -	#N/A	#N/A	#N/A	#N/A	#N/A	#N/A	0.276148	0.0121614	CTD-2012J19.3
rs10079348	5	1384607	5p15.33	1	RP11-325I22.2	#N/A	#N/A	#N/A	#N/A	#N/A	#N/A	-0.110331	0.0125425	NDUFS6
rs7717113	5	172781401	5q35.1	1	-	#N/A	#N/A	#N/A	#N/A	#N/A	#N/A	-0.193256; -0.187515	0.0495204; 0.0494124	CTC-308K20.3; LOC285593
rs16888572	5	21718946	5p14.3	1	RP11-804N13.1	#N/A	#N/A	#N/A	#N/A	#N/A	#N/A	0.265704	0.0245549	RP11-823P9.3
rs6453061	5	73771666	5q13.3	1	CTC-419K13.1	#N/A	#N/A	#N/A	#N/A	#N/A	#N/A	#N/A	#N/A	#N/A
rs12206846	6	108238917	6q21	2	SEC63; -	#N/A	#N/A	#N/A	#N/A	#N/A	#N/A	0.319994	0.000138182	SCML4
chr6_109038333_A_G	6	109038333	6q21	1	-	#N/A	#N/A	#N/A	#N/A	#N/A	#N/A	-0.208378	0.0253957	CCDC162P
rs74969259	6	23504700	6p22.3	1	-	#N/A	#N/A	#N/A	#N/A	#N/A	#N/A	#N/A	#N/A	#N/A
rs761098	6	2449186	6p25.2	2	GMDS-AS1; -	#N/A	#N/A	#N/A	#N/A	#N/A	#N/A	#N/A	#N/A	#N/A
rs12524673	6	25432769	6p22.2	3	LRRC16A; snoU13; -	#N/A	#N/A	#N/A	#N/A	#N/A	#N/A	#N/A	#N/A	#N/A
rs9261418	6	30076660	6p22.1	2	TRIM31; TRIM31-AS1	#N/A	#N/A	#N/A	#N/A	#N/A	#N/A	-0.290022; 0.274758; 0.308558; -0.4691; 0.29596; 0.209249; 0.373453; -0.169369; 0.277171; 0.332909	0.0165607; 0.023436; 0.00771577; 0.000235369; 0.00775136; 0.0176515; 0.00217218; 0.0380204; 0.0336647; 0.010835	HCG4; LOC554223; SFTA2; TRIM31; HLA-G; HLA-F; ZFP57; HCG18; RPL23AP1; HLA-L
chr6_41354653_C_T	6	41354653	6p21.1	1	-	#N/A	#N/A	#N/A	#N/A	#N/A	#N/A	#N/A	#N/A	#N/A
chr6_41354872_A_C	6	41354872	6p21.1	1	-	#N/A	#N/A	#N/A	#N/A	#N/A	#N/A	#N/A	#N/A	#N/A
chr6_41362013_G_T	6	41362013	6p21.1	1	-	#N/A	#N/A	#N/A	#N/A	#N/A	#N/A	#N/A	#N/A	#N/A
rs4706458	6	71382765	6q13	1	SMAP1	#N/A	#N/A	#N/A	#N/A	#N/A	#N/A	-0.196691	0.00110342	B3GAT2
rs2504748	6	71583804	6q13	1	B3GAT2	#N/A	#N/A	#N/A	#N/A	#N/A	#N/A	-0.0929575; 0.250749	0.0468647; 8.99434e-05	SMAP1; B3GAT2
rs2647417	6	76435943	6q14.1	1	-	#N/A	#N/A	#N/A	#N/A	#N/A	#N/A	#N/A	#N/A	#N/A
kgp3489492	7	102807820	7q22.1	1	-	#N/A	#N/A	#N/A	#N/A	#N/A	#N/A	0.282834	0.0260825	LRRC17
rs62482372	7	102924512	7q22.1	1	DPY19L2P2	#N/A	#N/A	#N/A	#N/A	#N/A	#N/A	0.293968; 0.338176	0.0231552; 0.0417737	RELN; POLR2J2
chr7_130488534_C_T	7	130488534	7q32.3	1	-	#N/A	#N/A	#N/A	#N/A	#N/A	#N/A	0.127191; 0.135093; 0.102706; 0.259957	0.00640922; 0.0457511; 0.0338451; 0.0155865	CPA1; CPA5; UBE2H; AC016831.7
rs8175950	7	142661695	7q34	2	KEL; -	#N/A	#N/A	#N/A	#N/A	#N/A	#N/A	#N/A	#N/A	#N/A
rs6957979	7	36982483	7p14.2	1	ELMO1	#N/A	#N/A	#N/A	#N/A	#N/A	#N/A	#N/A	#N/A	#N/A
chr7_47538546_C_T	7	47538546	7p12.3	1	TNS3	#N/A	#N/A	#N/A	#N/A	#N/A	#N/A	#N/A	#N/A	#N/A
chr7_587783_C_G	7	587783	7p22.3	2	PRKAR1B; AC147651.2	#N/A	#N/A	#N/A	#N/A	#N/A	#N/A	-0.213298	0.0160366	LOC101927000
rs3801714	7	81830424	7q21.11	1	CACNA2D1	#N/A	#N/A	#N/A	#N/A	#N/A	#N/A	#N/A	#N/A	#N/A
rs12549518	8	128309591	8q24.21	2	CASC8; RP11-382A18.3	#N/A	#N/A	#N/A	#N/A	#N/A	#N/A	#N/A	#N/A	#N/A
rs6996866	8	128310155	8q24.21	1	CASC8	#N/A	#N/A	#N/A	#N/A	#N/A	#N/A	#N/A	#N/A	#N/A
rs283727	8	128313360	8q24.21	1	CASC8	#N/A	#N/A	#N/A	#N/A	#N/A	#N/A	-0.133868	0.0404517	PVT1
rs283728	8	128313500	8q24.21	1	CASC8	#N/A	#N/A	#N/A	#N/A	#N/A	#N/A	#N/A	#N/A	#N/A
rs4871015	8	128314516	8q24.21	1	CASC8	#N/A	#N/A	#N/A	#N/A	#N/A	#N/A	#N/A	#N/A	#N/A
rs283705	8	128317450	8q24.21	2	CASC8; -	#N/A	#N/A	#N/A	#N/A	#N/A	#N/A	#N/A	#N/A	#N/A
rs11781932	8	128330178	8q24.21	1	CASC8	#N/A	#N/A	#N/A	#N/A	#N/A	#N/A	#N/A	#N/A	#N/A
rs7002712	8	128341612	8q24.21	2	CASC8; -	#N/A	#N/A	#N/A	#N/A	#N/A	#N/A	#N/A	#N/A	#N/A
rs7838714	8	128343948	8q24.21	1	CASC8	#N/A	#N/A	#N/A	#N/A	#N/A	#N/A	#N/A	#N/A	#N/A
rs17465052	8	128354080	8q24.21	3	CASC8; RP11-382A18.2; -	#N/A	#N/A	#N/A	#N/A	#N/A	#N/A	#N/A	#N/A	#N/A
rs10098985	8	128355019	8q24.21	3	CASC8; RP11-382A18.2; -	#N/A	#N/A	#N/A	#N/A	#N/A	#N/A	-0.111942	0.0499765	FAM84B
rs10097200	8	128363652	8q24.21	2	CASC8; RP11-382A18.2	#N/A	#N/A	#N/A	#N/A	#N/A	#N/A	#N/A	#N/A	#N/A
rs7002826	8	128364271	8q24.21	2	CASC8; RP11-382A18.2	#N/A	#N/A	#N/A	#N/A	#N/A	#N/A	#N/A	#N/A	#N/A
rs7007568	8	128364906	8q24.21	3	CASC8; RP11-382A18.2; -	#N/A	#N/A	#N/A	#N/A	#N/A	#N/A	#N/A	#N/A	#N/A
rs7842494	8	128366570	8q24.21	2	CASC8; RP11-382A18.2	#N/A	#N/A	#N/A	#N/A	#N/A	#N/A	#N/A	#N/A	#N/A
rs5022926	8	128366829	8q24.21	2	CASC8; RP11-382A18.2	#N/A	#N/A	#N/A	#N/A	#N/A	#N/A	#N/A	#N/A	#N/A
rs9297753	8	128375270	8q24.21	2	CASC8; RP11-382A18.2	#N/A	#N/A	#N/A	#N/A	#N/A	#N/A	#N/A	#N/A	#N/A
rs9283954	8	128375370	8q24.21	2	CASC8; RP11-382A18.2	#N/A	#N/A	#N/A	#N/A	#N/A	#N/A	#N/A	#N/A	#N/A
rs7831303	8	128376732	8q24.21	3	CASC8; RP11-382A18.2; -	#N/A	#N/A	#N/A	#N/A	#N/A	#N/A	#N/A	#N/A	#N/A
rs7815100	8	128376801	8q24.21	3	CASC8; RP11-382A18.2; -	#N/A	#N/A	#N/A	#N/A	#N/A	#N/A	#N/A	#N/A	#N/A
rs6988647	8	128377656	8q24.21	3	CASC8; RP11-382A18.2; -	#N/A	#N/A	#N/A	#N/A	#N/A	#N/A	#N/A	#N/A	#N/A
rs9692890	8	128377774	8q24.21	3	CASC8; RP11-382A18.2; -	#N/A	#N/A	#N/A	#N/A	#N/A	#N/A	#N/A	#N/A	#N/A
rs9693143	8	128378025	8q24.21	3	CASC8; RP11-382A18.2; -	#N/A	#N/A	#N/A	#N/A	#N/A	#N/A	#N/A	#N/A	#N/A
rs16902126	8	128382357	8q24.21	2	CASC8; RP11-382A18.2	#N/A	#N/A	#N/A	#N/A	#N/A	#N/A	#N/A	#N/A	#N/A
rs7815245	8	128383597	8q24.21	3	CASC8; RP11-382A18.2; -	#N/A	#N/A	#N/A	#N/A	#N/A	#N/A	#N/A	#N/A	#N/A
rs1562430	8	128387852	8q24.21	3	CASC8; RP11-382A18.2; -	#N/A	#N/A	#N/A	#N/A	#N/A	#N/A	#N/A	#N/A	#N/A
rs7015780	8	128389507	8q24.21	2	CASC8; RP11-382A18.2	#N/A	#N/A	#N/A	#N/A	#N/A	#N/A	-0.120079	0.0351365	FAM84B
rs2052701	8	133731794	8q24.22	1	TMEM71	#N/A	#N/A	#N/A	#N/A	#N/A	#N/A	#N/A	#N/A	#N/A
rs180204	8	133881244	8q24.22	1	TG	#N/A	#N/A	#N/A	#N/A	#N/A	#N/A	#N/A	#N/A	#N/A
rs2247583	8	14604752	8p22	1	SGCZ	#N/A	#N/A	#N/A	#N/A	#N/A	#N/A	#N/A	#N/A	#N/A
rs4733347	8	32376010	8p12	1	NRG1	#N/A	#N/A	#N/A	#N/A	#N/A	#N/A	0.190924	0.0334044	RP11-722E23.2
rs1108144	8	96404286	8q22.1	1	KB-1047C11.2	#N/A	#N/A	#N/A	#N/A	#N/A	#N/A	0.122918; 0.159445	0.0445769; 0.0432345	INTS8; CCNE2
rs11778211	8	96407360	8q22.1	1	KB-1047C11.2	#N/A	#N/A	#N/A	#N/A	#N/A	#N/A	0.184133	0.011441	RAD54B

## Sheet: Table S6 ci_prom
SNP	chr	position	cytoband	n_annotated_genes	Annotated_SYMBOL_coll	n_ciprom	SYMBOL_prom_ci_coll	n__DEgenes_ciprom	DEgenes_SYMBOL_prom_ci_coll	SYMBOL_GTEx_nominal_coll	pval_nominal_GTEx_nominal_coll	slope_GTEx_nominal_coll
rs12782552	10	21428541	10p12.31	2	C10orf113; NEBL	#N/A	#N/A	#N/A	#N/A	NEBL-AS1	0.044097	-0.396165
rs661893	10	30895478	10p11.23	1	-	#N/A	#N/A	#N/A	#N/A	ZEB1-AS1	0.0242453	0.132142
rs793088	10	31364621	10p11.22	1	-	#N/A	#N/A	#N/A	#N/A	RP11-330O11.3	0.0433164	-0.178191
rs793094	10	31386822	10p11.22	1	-	#N/A	#N/A	#N/A	#N/A	RP11-330O11.3	0.0218876	-0.190316
rs12415110	10	37096338	10p11.21	1	-	#N/A	#N/A	#N/A	#N/A	#N/A	#N/A	#N/A
rs2050502	10	44203201	10q11.21	1	-	#N/A	#N/A	#N/A	#N/A	#N/A	#N/A	#N/A
rs12258494	10	44233503	10q11.21	1	TCEB1P30	#N/A	#N/A	#N/A	#N/A	BMS1	0.0472754	0.169657
rs4080021	10	44268654	10q11.21	1	RP11-272J7.4	#N/A	#N/A	#N/A	#N/A	#N/A	#N/A	#N/A
rs12776000	10	60576687	10q21.1	2	BICC1; -	#N/A	#N/A	#N/A	#N/A	BICC1	0.0346977	-0.213088
rs3912390	10	82776591	10q23.1	1	-	#N/A	#N/A	#N/A	#N/A	TMEM254-AS1	0.0234882	-0.196913
rs1398312	11	106279611	11q22.3	1	-	#N/A	#N/A	#N/A	#N/A	RP11-680E19.2	0.0148482	0.20602
rs6656346	1	111103688	1p13.3	1	-	#N/A	#N/A	#N/A	#N/A	LAMTOR5-AS1	0.0360166	0.223503
rs12136952	1	12661421	1p36.22	2	DHRS3; -	1	VPS13D	#N/A	#N/A	CLCN6; VPS13D; PLOD1	0.0368941; 0.00671962; 0.016407	-0.118783; -0.146148; 0.135773
chr1_145556986_C_T	1	145556986	1q21.1	2	ANKRD35; -	#N/A	#N/A	#N/A	#N/A	NUDT17; RP11-315I20.1	0.00682418; 0.019326	0.233406; -0.205154
chr1_145740514_C_T	1	145740514	1q21.1	1	PDZK1	#N/A	#N/A	#N/A	#N/A	RP4-704D21.2	0.0382597	-0.398514
chr1_150902203_A_T	1	150902203	1q21.3	1	SETDB1	#N/A	#N/A	#N/A	#N/A	SNX27; CTSK; SEMA6C; CTSS; THEM5	0.0229325; 0.00837526; 0.0464014; 0.000419314; 0.00424313	-0.3025; 0.342843; -0.285104; 0.304419; -0.422044
chr1_150974311_A_G	1	150974311	1q21.3	1	FAM63A	#N/A	#N/A	#N/A	#N/A	SNX27; CTSK; CTSS; THEM5	0.0202822; 0.0379431; 7.84886e-05; 0.042314	-0.276876; 0.243015; 0.304449; -0.270362
rs6697813	1	15951743	1p36.21	1	DDI2	#N/A	#N/A	#N/A	#N/A	AGMAT; PLEKHM2; FLJ37453	0.000136362; 0.0238815; 0.0398915	-0.366437; 0.116805; -0.18664
rs2250174	1	160950966	1q23.3	1	-	#N/A	#N/A	#N/A	#N/A	DCAF8; ADAMTS4; ARHGAP30; LOC729867; RP11-122G18.5	0.00940962; 0.032085; 0.0279211; 0.036834; 0.0402333	0.142693; 0.174264; 0.0933966; 0.226521; 0.19541
chr11_68446868_A_G	11	68446868	11q13.3	1	GAL	#N/A	#N/A	#N/A	#N/A	#N/A	#N/A	#N/A
rs10798348	1	175194390	1q25.1	1	-	#N/A	#N/A	#N/A	#N/A	#N/A	#N/A	#N/A
rs4652490	1	180217250	1q25.2	2	LHX4; -	#N/A	#N/A	#N/A	#N/A	QSOX1	0.00656616	0.187145
rs4465241	1	199963622	1q32.1	1	-	#N/A	#N/A	#N/A	#N/A	DDX59; MROH3P	0.025761; 0.0276476	0.176893; 0.238199
rs3790840	1	200016460	1q32.1	1	NR5A2	#N/A	#N/A	#N/A	#N/A	DDX59; LINC00862	0.0466275; 0.0211443	-0.156126; -0.22465
rs12145049	1	203777741	1q32.1	2	ZC3H11A; RP11-397P13.6	#N/A	#N/A	#N/A	#N/A	ADORA1	0.0495383	-0.187272
rs17016036	1	210537248	1q32.2	1	HHAT	#N/A	#N/A	#N/A	#N/A	TRAF3IP3; DIEXF	0.00751283; 0.0266285	-0.230937; 0.121986
rs4767014	12	113264755	12q24.13	1	RPH3A	#N/A	#N/A	#N/A	#N/A	RASAL1	0.049247	0.175808
rs6560884	12	133142411	12q24.33	1	FBRSL1	#N/A	#N/A	#N/A	#N/A	FBRSL1; LOC100996246	1.40069e-21; 0.00428329	-0.653455; 0.345698
chr12_133155424_A_G	12	133155424	12q24.33	1	FBRSL1	#N/A	#N/A	#N/A	#N/A	FBRSL1; RP11-46H11.3; LOC100996246	0.00597463; 0.0489866; 0.0136421	-0.171915; -0.190552; 0.245053
rs11118832	1	221884371	1q41	1	DUSP10	#N/A	#N/A	#N/A	#N/A	MARC2; RP11-378J18.6	0.0369355; 0.0365105	0.199904; 0.314665
rs10784548	12	40762546	12q12	1	LRRK2	#N/A	#N/A	#N/A	#N/A	#N/A	#N/A	#N/A
rs3759125	12	50343608	12q13.12	3	AQP2; RP11-469H8.6; RP11-469H8.8	#N/A	#N/A	#N/A	#N/A	LMBR1L; AQP5	0.0187056; 0.0136254	0.0912296; -0.205723
rs9783504	12	821451	12p13.33	1	-	#N/A	#N/A	#N/A	#N/A	#N/A	#N/A	#N/A
rs7315904	12	835074	12p13.33	1	-	#N/A	#N/A	#N/A	#N/A	#N/A	#N/A	#N/A
rs249184	12	95340146	12q22	2	NDUFA12; -	#N/A	#N/A	#N/A	#N/A	#N/A	#N/A	#N/A
rs9645898	13	101677816	13q32.3	1	NALCN-AS1	#N/A	#N/A	#N/A	#N/A	#N/A	#N/A	#N/A
rs9557954	13	103576386	13q33.1	1	-	#N/A	#N/A	#N/A	#N/A	FGF14-AS2	0.00894509	0.19542
rs7325781	13	36080730	13q13.3	1	NBEA	#N/A	#N/A	#N/A	#N/A	#N/A	#N/A	#N/A
rs1461962	13	36081790	13q13.3	1	NBEA	#N/A	#N/A	#N/A	#N/A	#N/A	#N/A	#N/A
rs940595	15	24038267	15q11.2	1	-	#N/A	#N/A	#N/A	#N/A	RP11-580I1.2	0.011827	-0.214874
rs4782165	16	14551039	16p13.12	3	PARN; AC092291.1; -	#N/A	#N/A	#N/A	#N/A	NOMO1; PARN	0.00645532; 0.00528189	-0.228138; 0.193961
rs209451	16	22845744	16p12.2	1	HS3ST2	#N/A	#N/A	#N/A	#N/A	EEF2K; UBFD1; CDR2	0.0252831; 0.00233665; 0.0219916	-0.147113; -0.17821; -0.171611
rs7206380	16	79471714	16q23.2	1	-	#N/A	#N/A	#N/A	#N/A	#N/A	#N/A	#N/A
chr17_143542_A_G	17	143542	17p13.3	2	RPH3AL; -	#N/A	#N/A	#N/A	#N/A	FAM101B	0.0165189	0.20451
chr17_36895206_A_G	17	36895206	17q12	2	PCGF2; CISD3	#N/A	#N/A	#N/A	#N/A	SYNRG; RP11-1407O15.2; TBC1D3F	0.00940108; 0.0271345; 0.0140367	0.219994; 0.17257; -0.202183
rs67892803	17	46088729	17q21.32	1	-	#N/A	#N/A	#N/A	#N/A	PNPO; CDK5RAP3; SKAP1; SCRN2; SP2; PRR15L; RP11-6N17.10; RP11-6N17.3	0.00656867; 0.00386763; 0.00552021; 0.00424051; 0.0243438; 0.000107027; 0.0215505; 0.00832167	0.183935; 0.132872; -0.221119; -0.214231; -0.142745; 0.255643; 0.215714; 0.254119
rs11654719	17	64340380	17q24.2	1	PRKCA	#N/A	#N/A	#N/A	#N/A	#N/A	#N/A	#N/A
chr17_69121396_A_G	17	69121396	17q24.3	1	CASC17	#N/A	#N/A	#N/A	#N/A	RP11-84E24.2	0.00483001	-0.485014
chr17_69124724_C_T	17	69124724	17q24.3	1	CASC17	#N/A	#N/A	#N/A	#N/A	RP11-84E24.2	0.00483001	-0.485014
rs7214041	17	70401476	17q24.3	2	LINC00511; -	#N/A	#N/A	#N/A	#N/A	LOC101928205	0.0103494	0.322243
rs67284056	18	30696277	18q12.1	1	CCDC178	#N/A	#N/A	#N/A	#N/A	#N/A	#N/A	#N/A
rs34871003	18	30842257	18q12.1	1	CCDC178	#N/A	#N/A	#N/A	#N/A	#N/A	#N/A	#N/A
rs12402858	1	87845112	1p22.3	1	-	#N/A	#N/A	#N/A	#N/A	#N/A	#N/A	#N/A
chr1_87859293_C_G	1	87859293	1p22.3	1	-	#N/A	#N/A	#N/A	#N/A	HS2ST1	0.00405271	0.187174
rs11081370	18	8241986	18p11.23	1	PTPRM	#N/A	#N/A	#N/A	#N/A	#N/A	#N/A	#N/A
rs773914	19	16859652	19p13.11	1	NWD1	#N/A	#N/A	#N/A	#N/A	FAM32A; EPS15L1; BST2; PGLS; CTC-429P9.5	0.0438583; 0.0337636; 0.0252722; 0.0417997; 0.0444176	-0.204548; -0.26436; 0.287807; -0.188519; -0.36224
rs8111858	19	4326239	19p13.3	2	FSD1; STAP2	#N/A	#N/A	#N/A	#N/A	LRG1; STAP2; C19orf71; PLIN5	0.0219684; 8.5625e-06; 0.0384269; 0.0382478	-0.0986879; 0.281827; -0.137682; -0.111348
rs62209634	20	32456862	20q11.22	1	-	3	PXMP4; ZNF341; RP4-553F4.2	1	PXMP4	BPIFB2; CHMP4B; DYNLRB1	0.00446382; 0.0102194; 0.0196656	0.322228; -0.14293; -0.156537
rs6074037	20	44769666	20q13.12	1	-	#N/A	#N/A	#N/A	#N/A	EYA2; PLTP; WFDC3; ZNF840	0.0210305; 0.0392569; 0.0306411; 0.00264566	-0.185633; -0.130022; -0.200398; -0.278767
rs12625828	20	48844585	20q13.13	1	-	#N/A	#N/A	#N/A	#N/A	KCNB1; B4GALT5	0.0330605; 0.018227	-0.123509; -0.10825
rs2232073	20	6065731	20p12.3	1	FERMT1	#N/A	#N/A	#N/A	#N/A	LINC00654; RP5-1022P6.3	0.000809526; 0.0284688	-0.290654; -0.213706
rs4383344	2	120278171	2q14.2	1	SCTR	#N/A	#N/A	#N/A	#N/A	INHBB	0.009642	0.193889
rs13408950	2	14682175	2p24.3	1	-	#N/A	#N/A	#N/A	#N/A	#N/A	#N/A	#N/A
rs34501967	2	174869889	2q31.1	1	-	#N/A	#N/A	#N/A	#N/A	#N/A	#N/A	#N/A
rs35463408	2	175619948	2q31.1	2	CHRNA1; AC018890.6	#N/A	#N/A	#N/A	#N/A	ATP5G3	0.0436904	0.142547
rs2873308	2	236566346	2q37.2	1	AGAP1	#N/A	#N/A	#N/A	#N/A	#N/A	#N/A	#N/A
rs6730757	2	43541598	2p21	1	THADA	#N/A	#N/A	#N/A	#N/A	COX7A2L; PLEKHH2; C1GALT1C1L	0.0446272; 0.00491111; 0.0330478	0.106609; 0.190244; 0.175219
rs11720514	3	112113334	3q13.2	1	RP11-231E6.1	#N/A	#N/A	#N/A	#N/A	C3orf52; GCSAM; RP11-757F18.5	0.0326965; 0.0026243; 0.0280233	0.139392; 0.210583; 0.160881
rs999802	3	112127280	3q13.2	2	RP11-231E6.1; -	#N/A	#N/A	#N/A	#N/A	GCSAM	0.0138464	-0.16957
rs1683813	3	128666029	3q21.3	2	RP11-723O4.6; KIAA1257	#N/A	#N/A	#N/A	#N/A	EEFSEC; LOC653712; RPL32P3; RP11-723O4.9	0.0433503; 9.04038e-07; 0.0231586; 4.37994e-07	0.137429; 0.444714; 0.149007; 0.448913
chr3_177443968_A_C	3	177443968	3q26.32	1	LINC00578	#N/A	#N/A	#N/A	#N/A	#N/A	#N/A	#N/A
chr3_183881234_A_G	3	183881234	3q27.1	2	DVL3; EIF2B5	#N/A	#N/A	#N/A	#N/A	EIF4G1; ABCF3; PSMD2; RP11-329B9.3	0.02975; 0.0141124; 0.0102455; 0.0150002	-0.10059; 0.200486; -0.164421; -0.28691
rs12152217	3	183935258	3q27.1	1	EIF2B5	#N/A	#N/A	#N/A	#N/A	EIF4G1; ABCF3; CAMK2N2; PSMD2	0.0146982; 0.042584; 0.00896128; 0.025127	-0.1137; 0.167504; 0.158595; -0.144966
rs11922997	3	34997498	3p22.3	1	-	#N/A	#N/A	#N/A	#N/A	#N/A	#N/A	#N/A
rs2584051	3	3842821	3p26.2	3	LRRN1; SUMF1; -	#N/A	#N/A	#N/A	#N/A	#N/A	#N/A	#N/A
rs7635135	3	66892025	3p14.1	1	-	#N/A	#N/A	#N/A	#N/A	#N/A	#N/A	#N/A
chr4_125576612_C_T	4	125576612	4q28.1	1	-	#N/A	#N/A	#N/A	#N/A	#N/A	#N/A	#N/A
rs2391054	4	127343002	4q28.1	1	-	#N/A	#N/A	#N/A	#N/A	#N/A	#N/A	#N/A
rs2706822	4	168362952	4q32.3	1	-	#N/A	#N/A	#N/A	#N/A	#N/A	#N/A	#N/A
rs11734697	4	181125964	4q34.3	1	-	#N/A	#N/A	#N/A	#N/A	#N/A	#N/A	#N/A
rs4689545	4	6767336	4p16.1	1	-	#N/A	#N/A	#N/A	#N/A	RP11-367J11.3	0.0464229	0.152133
chr4_69266379_C_G	4	69266379	4q13.2	1	-	#N/A	#N/A	#N/A	#N/A	UGT2B7; RP11-468N14.13	0.0316037; 0.0325562	-0.152664; -0.193253
rs10032900	4	7491757	4p16.1	1	SORCS2	#N/A	#N/A	#N/A	#N/A	MRFAP1L1	0.027039	0.131572
rs6869928	5	10589502	5p15.2	1	ANKRD33B	#N/A	#N/A	#N/A	#N/A	ANKRD33B	0.0169107	-0.220554
rs4702704	5	10591672	5p15.2	1	ANKRD33B	#N/A	#N/A	#N/A	#N/A	CMBL	0.00340193	-0.13887
rs2736098	5	1294086	5p15.33	2	TERT; -	#N/A	#N/A	#N/A	#N/A	CTD-2012J19.3	0.0121614	0.276148
rs10079348	5	1384607	5p15.33	1	RP11-325I22.2	#N/A	#N/A	#N/A	#N/A	NDUFS6	0.0125425	-0.110331
rs7717113	5	172781401	5q35.1	1	-	#N/A	#N/A	#N/A	#N/A	CTC-308K20.3; LOC285593	0.0495204; 0.0494124	-0.193256; -0.187515
rs16888572	5	21718946	5p14.3	1	RP11-804N13.1	#N/A	#N/A	#N/A	#N/A	RP11-823P9.3	0.0245549	0.265704
rs6453061	5	73771666	5q13.3	1	CTC-419K13.1	#N/A	#N/A	#N/A	#N/A	#N/A	#N/A	#N/A
rs12206846	6	108238917	6q21	2	SEC63; -	#N/A	#N/A	#N/A	#N/A	SCML4	0.000138182	0.319994
chr6_109038333_A_G	6	109038333	6q21	1	-	#N/A	#N/A	#N/A	#N/A	CCDC162P	0.0253957	-0.208378
rs74969259	6	23504700	6p22.3	1	-	#N/A	#N/A	#N/A	#N/A	#N/A	#N/A	#N/A
rs761098	6	2449186	6p25.2	2	GMDS-AS1; -	#N/A	#N/A	#N/A	#N/A	#N/A	#N/A	#N/A
rs12524673	6	25432769	6p22.2	3	LRRC16A; snoU13; -	#N/A	#N/A	#N/A	#N/A	#N/A	#N/A	#N/A
rs9261418	6	30076660	6p22.1	2	TRIM31; TRIM31-AS1	#N/A	#N/A	#N/A	#N/A	HCG4; LOC554223; SFTA2; TRIM31; HLA-G; HLA-F; ZFP57; HCG18; RPL23AP1; HLA-L	0.0165607; 0.023436; 0.00771577; 0.000235369; 0.00775136; 0.0176515; 0.00217218; 0.0380204; 0.0336647; 0.010835	-0.290022; 0.274758; 0.308558; -0.4691; 0.29596; 0.209249; 0.373453; -0.169369; 0.277171; 0.332909
chr6_41354653_C_T	6	41354653	6p21.1	1	-	#N/A	#N/A	#N/A	#N/A	#N/A	#N/A	#N/A
chr6_41354872_A_C	6	41354872	6p21.1	1	-	#N/A	#N/A	#N/A	#N/A	#N/A	#N/A	#N/A
chr6_41362013_G_T	6	41362013	6p21.1	1	-	#N/A	#N/A	#N/A	#N/A	#N/A	#N/A	#N/A
rs4706458	6	71382765	6q13	1	SMAP1	#N/A	#N/A	#N/A	#N/A	B3GAT2	0.00110342	-0.196691
rs2504748	6	71583804	6q13	1	B3GAT2	#N/A	#N/A	#N/A	#N/A	SMAP1; B3GAT2	0.0468647; 8.99434e-05	-0.0929575; 0.250749
rs2647417	6	76435943	6q14.1	1	-	#N/A	#N/A	#N/A	#N/A	#N/A	#N/A	#N/A
kgp3489492	7	102807820	7q22.1	1	-	#N/A	#N/A	#N/A	#N/A	LRRC17	0.0260825	0.282834
rs62482372	7	102924512	7q22.1	1	DPY19L2P2	#N/A	#N/A	#N/A	#N/A	RELN; POLR2J2	0.0231552; 0.0417737	0.293968; 0.338176
chr7_130488534_C_T	7	130488534	7q32.3	1	-	#N/A	#N/A	#N/A	#N/A	CPA1; CPA5; UBE2H; AC016831.7	0.00640922; 0.0457511; 0.0338451; 0.0155865	0.127191; 0.135093; 0.102706; 0.259957
rs8175950	7	142661695	7q34	2	KEL; -	#N/A	#N/A	#N/A	#N/A	#N/A	#N/A	#N/A
rs6957979	7	36982483	7p14.2	1	ELMO1	#N/A	#N/A	#N/A	#N/A	#N/A	#N/A	#N/A
chr7_47538546_C_T	7	47538546	7p12.3	1	TNS3	#N/A	#N/A	#N/A	#N/A	#N/A	#N/A	#N/A
chr7_587783_C_G	7	587783	7p22.3	2	PRKAR1B; AC147651.2	#N/A	#N/A	#N/A	#N/A	LOC101927000	0.0160366	-0.213298
rs3801714	7	81830424	7q21.11	1	CACNA2D1	#N/A	#N/A	#N/A	#N/A	#N/A	#N/A	#N/A
rs12549518	8	128309591	8q24.21	2	CASC8; RP11-382A18.3	#N/A	#N/A	#N/A	#N/A	#N/A	#N/A	#N/A
rs6996866	8	128310155	8q24.21	1	CASC8	#N/A	#N/A	#N/A	#N/A	#N/A	#N/A	#N/A
rs283727	8	128313360	8q24.21	1	CASC8	#N/A	#N/A	#N/A	#N/A	PVT1	0.0404517	-0.133868
rs283728	8	128313500	8q24.21	1	CASC8	#N/A	#N/A	#N/A	#N/A	#N/A	#N/A	#N/A
rs4871015	8	128314516	8q24.21	1	CASC8	#N/A	#N/A	#N/A	#N/A	#N/A	#N/A	#N/A
rs283705	8	128317450	8q24.21	2	CASC8; -	#N/A	#N/A	#N/A	#N/A	#N/A	#N/A	#N/A
rs11781932	8	128330178	8q24.21	1	CASC8	#N/A	#N/A	#N/A	#N/A	#N/A	#N/A	#N/A
rs7002712	8	128341612	8q24.21	2	CASC8; -	#N/A	#N/A	#N/A	#N/A	#N/A	#N/A	#N/A
rs7838714	8	128343948	8q24.21	1	CASC8	#N/A	#N/A	#N/A	#N/A	#N/A	#N/A	#N/A
rs17465052	8	128354080	8q24.21	3	CASC8; RP11-382A18.2; -	#N/A	#N/A	#N/A	#N/A	#N/A	#N/A	#N/A
rs10098985	8	128355019	8q24.21	3	CASC8; RP11-382A18.2; -	#N/A	#N/A	#N/A	#N/A	FAM84B	0.0499765	-0.111942
rs10097200	8	128363652	8q24.21	2	CASC8; RP11-382A18.2	#N/A	#N/A	#N/A	#N/A	#N/A	#N/A	#N/A
rs7002826	8	128364271	8q24.21	2	CASC8; RP11-382A18.2	#N/A	#N/A	#N/A	#N/A	#N/A	#N/A	#N/A
rs7007568	8	128364906	8q24.21	3	CASC8; RP11-382A18.2; -	#N/A	#N/A	#N/A	#N/A	#N/A	#N/A	#N/A
rs7842494	8	128366570	8q24.21	2	CASC8; RP11-382A18.2	#N/A	#N/A	#N/A	#N/A	#N/A	#N/A	#N/A
rs5022926	8	128366829	8q24.21	2	CASC8; RP11-382A18.2	#N/A	#N/A	#N/A	#N/A	#N/A	#N/A	#N/A
rs9297753	8	128375270	8q24.21	2	CASC8; RP11-382A18.2	#N/A	#N/A	#N/A	#N/A	#N/A	#N/A	#N/A
rs9283954	8	128375370	8q24.21	2	CASC8; RP11-382A18.2	#N/A	#N/A	#N/A	#N/A	#N/A	#N/A	#N/A
rs7831303	8	128376732	8q24.21	3	CASC8; RP11-382A18.2; -	#N/A	#N/A	#N/A	#N/A	#N/A	#N/A	#N/A
rs7815100	8	128376801	8q24.21	3	CASC8; RP11-382A18.2; -	#N/A	#N/A	#N/A	#N/A	#N/A	#N/A	#N/A
rs6988647	8	128377656	8q24.21	3	CASC8; RP11-382A18.2; -	#N/A	#N/A	#N/A	#N/A	#N/A	#N/A	#N/A
rs9692890	8	128377774	8q24.21	3	CASC8; RP11-382A18.2; -	#N/A	#N/A	#N/A	#N/A	#N/A	#N/A	#N/A
rs9693143	8	128378025	8q24.21	3	CASC8; RP11-382A18.2; -	#N/A	#N/A	#N/A	#N/A	#N/A	#N/A	#N/A
rs16902126	8	128382357	8q24.21	2	CASC8; RP11-382A18.2	#N/A	#N/A	#N/A	#N/A	#N/A	#N/A	#N/A
rs7815245	8	128383597	8q24.21	3	CASC8; RP11-382A18.2; -	#N/A	#N/A	#N/A	#N/A	#N/A	#N/A	#N/A
rs1562430	8	128387852	8q24.21	3	CASC8; RP11-382A18.2; -	#N/A	#N/A	#N/A	#N/A	#N/A	#N/A	#N/A
rs7015780	8	128389507	8q24.21	2	CASC8; RP11-382A18.2	#N/A	#N/A	#N/A	#N/A	FAM84B	0.0351365	-0.120079
rs2052701	8	133731794	8q24.22	1	TMEM71	#N/A	#N/A	#N/A	#N/A	#N/A	#N/A	#N/A
rs180204	8	133881244	8q24.22	1	TG	#N/A	#N/A	#N/A	#N/A	#N/A	#N/A	#N/A
rs2247583	8	14604752	8p22	1	SGCZ	#N/A	#N/A	#N/A	#N/A	#N/A	#N/A	#N/A
rs4733347	8	32376010	8p12	1	NRG1	#N/A	#N/A	#N/A	#N/A	RP11-722E23.2	0.0334044	0.190924
rs1108144	8	96404286	8q22.1	1	KB-1047C11.2	#N/A	#N/A	#N/A	#N/A	INTS8; CCNE2	0.0445769; 0.0432345	0.122918; 0.159445
rs11778211	8	96407360	8q22.1	1	KB-1047C11.2	#N/A	#N/A	#N/A	#N/A	RAD54B	0.011441	0.184133

## Sheet: Table S6 disgenet
SNP	chr	position	cytoband	n_annotated_genes	Annotated_SYMBOL_coll	disgenet
rs12782552	10	21428541	10p12.31	2	C10orf113; NEBL	#N/A
rs661893	10	30895478	10p11.23	1	-	#N/A
rs793088	10	31364621	10p11.22	1	-	#N/A
rs793094	10	31386822	10p11.22	1	-	#N/A
rs12415110	10	37096338	10p11.21	1	-	#N/A
rs2050502	10	44203201	10q11.21	1	-	#N/A
rs12258494	10	44233503	10q11.21	1	TCEB1P30	#N/A
rs4080021	10	44268654	10q11.21	1	RP11-272J7.4	#N/A
rs12776000	10	60576687	10q21.1	2	BICC1; -	#N/A
rs3912390	10	82776591	10q23.1	1	-	#N/A
rs1398312	11	106279611	11q22.3	1	-	#N/A
rs6656346	1	111103688	1p13.3	1	-	#N/A
rs12136952	1	12661421	1p36.22	2	DHRS3; -	#N/A
chr1_145556986_C_T	1	145556986	1q21.1	2	ANKRD35; -	#N/A
chr1_145740514_C_T	1	145740514	1q21.1	1	PDZK1	#N/A
chr1_150902203_A_T	1	150902203	1q21.3	1	SETDB1	#N/A
chr1_150974311_A_G	1	150974311	1q21.3	1	FAM63A	#N/A
rs6697813	1	15951743	1p36.21	1	DDI2	#N/A
rs2250174	1	160950966	1q23.3	1	-	#N/A
chr11_68446868_A_G	11	68446868	11q13.3	1	GAL	#N/A
rs10798348	1	175194390	1q25.1	1	-	#N/A
rs4652490	1	180217250	1q25.2	2	LHX4; -	#N/A
rs4465241	1	199963622	1q32.1	1	-	#N/A
rs3790840	1	200016460	1q32.1	1	NR5A2	#N/A
rs12145049	1	203777741	1q32.1	2	ZC3H11A; RP11-397P13.6	#N/A
rs17016036	1	210537248	1q32.2	1	HHAT	#N/A
rs4767014	12	113264755	12q24.13	1	RPH3A	#N/A
rs6560884	12	133142411	12q24.33	1	FBRSL1	#N/A
chr12_133155424_A_G	12	133155424	12q24.33	1	FBRSL1	#N/A
rs11118832	1	221884371	1q41	1	DUSP10	#N/A
rs10784548	12	40762546	12q12	1	LRRK2	#N/A
rs3759125	12	50343608	12q13.12	3	AQP2; RP11-469H8.6; RP11-469H8.8	#N/A
rs9783504	12	821451	12p13.33	1	-	#N/A
rs7315904	12	835074	12p13.33	1	-	#N/A
rs249184	12	95340146	12q22	2	NDUFA12; -	#N/A
rs9645898	13	101677816	13q32.3	1	NALCN-AS1	#N/A
rs9557954	13	103576386	13q33.1	1	-	#N/A
rs7325781	13	36080730	13q13.3	1	NBEA	#N/A
rs1461962	13	36081790	13q13.3	1	NBEA	#N/A
rs940595	15	24038267	15q11.2	1	-	#N/A
rs4782165	16	14551039	16p13.12	3	PARN; AC092291.1; -	#N/A
rs209451	16	22845744	16p12.2	1	HS3ST2	#N/A
rs7206380	16	79471714	16q23.2	1	-	#N/A
chr17_143542_A_G	17	143542	17p13.3	2	RPH3AL; -	#N/A
chr17_36895206_A_G	17	36895206	17q12	2	PCGF2; CISD3	#N/A
rs67892803	17	46088729	17q21.32	1	-	#N/A
rs11654719	17	64340380	17q24.2	1	PRKCA	#N/A
chr17_69121396_A_G	17	69121396	17q24.3	1	CASC17	#N/A
chr17_69124724_C_T	17	69124724	17q24.3	1	CASC17	#N/A
rs7214041	17	70401476	17q24.3	2	LINC00511; -	#N/A
rs67284056	18	30696277	18q12.1	1	CCDC178	#N/A
rs34871003	18	30842257	18q12.1	1	CCDC178	#N/A
rs12402858	1	87845112	1p22.3	1	-	#N/A
chr1_87859293_C_G	1	87859293	1p22.3	1	-	#N/A
rs11081370	18	8241986	18p11.23	1	PTPRM	#N/A
rs773914	19	16859652	19p13.11	1	NWD1	#N/A
rs8111858	19	4326239	19p13.3	2	FSD1; STAP2	#N/A
rs62209634	20	32456862	20q11.22	1	-	#N/A
rs6074037	20	44769666	20q13.12	1	-	#N/A
rs12625828	20	48844585	20q13.13	1	-	#N/A
rs2232073	20	6065731	20p12.3	1	FERMT1	#N/A
rs4383344	2	120278171	2q14.2	1	SCTR	#N/A
rs13408950	2	14682175	2p24.3	1	-	#N/A
rs34501967	2	174869889	2q31.1	1	-	#N/A
rs35463408	2	175619948	2q31.1	2	CHRNA1; AC018890.6	#N/A
rs2873308	2	236566346	2q37.2	1	AGAP1	#N/A
rs6730757	2	43541598	2p21	1	THADA	#N/A
rs11720514	3	112113334	3q13.2	1	RP11-231E6.1	#N/A
rs999802	3	112127280	3q13.2	2	RP11-231E6.1; -	#N/A
rs1683813	3	128666029	3q21.3	2	RP11-723O4.6; KIAA1257	#N/A
chr3_177443968_A_C	3	177443968	3q26.32	1	LINC00578	#N/A
chr3_183881234_A_G	3	183881234	3q27.1	2	DVL3; EIF2B5	#N/A
rs12152217	3	183935258	3q27.1	1	EIF2B5	#N/A
rs11922997	3	34997498	3p22.3	1	-	#N/A
rs2584051	3	3842821	3p26.2	3	LRRN1; SUMF1; -	#N/A
rs7635135	3	66892025	3p14.1	1	-	#N/A
chr4_125576612_C_T	4	125576612	4q28.1	1	-	#N/A
rs2391054	4	127343002	4q28.1	1	-	#N/A
rs2706822	4	168362952	4q32.3	1	-	#N/A
rs11734697	4	181125964	4q34.3	1	-	#N/A
rs4689545	4	6767336	4p16.1	1	-	#N/A
chr4_69266379_C_G	4	69266379	4q13.2	1	-	#N/A
rs10032900	4	7491757	4p16.1	1	SORCS2	#N/A
rs6869928	5	10589502	5p15.2	1	ANKRD33B	#N/A
rs4702704	5	10591672	5p15.2	1	ANKRD33B	#N/A
rs2736098	5	1294086	5p15.33	2	TERT; -	Several neoplasias
rs10079348	5	1384607	5p15.33	1	RP11-325I22.2	#N/A
rs7717113	5	172781401	5q35.1	1	-	#N/A
rs16888572	5	21718946	5p14.3	1	RP11-804N13.1	#N/A
rs6453061	5	73771666	5q13.3	1	CTC-419K13.1	#N/A
rs12206846	6	108238917	6q21	2	SEC63; -	#N/A
chr6_109038333_A_G	6	109038333	6q21	1	-	#N/A
rs74969259	6	23504700	6p22.3	1	-	#N/A
rs761098	6	2449186	6p25.2	2	GMDS-AS1; -	#N/A
rs12524673	6	25432769	6p22.2	3	LRRC16A; snoU13; -	#N/A
rs9261418	6	30076660	6p22.1	2	TRIM31; TRIM31-AS1	#N/A
chr6_41354653_C_T	6	41354653	6p21.1	1	-	#N/A
chr6_41354872_A_C	6	41354872	6p21.1	1	-	#N/A
chr6_41362013_G_T	6	41362013	6p21.1	1	-	#N/A
rs4706458	6	71382765	6q13	1	SMAP1	#N/A
rs2504748	6	71583804	6q13	1	B3GAT2	#N/A
rs2647417	6	76435943	6q14.1	1	-	#N/A
kgp3489492	7	102807820	7q22.1	1	-	#N/A
rs62482372	7	102924512	7q22.1	1	DPY19L2P2	#N/A
chr7_130488534_C_T	7	130488534	7q32.3	1	-	#N/A
rs8175950	7	142661695	7q34	2	KEL; -	#N/A
rs6957979	7	36982483	7p14.2	1	ELMO1	#N/A
chr7_47538546_C_T	7	47538546	7p12.3	1	TNS3	#N/A
chr7_587783_C_G	7	587783	7p22.3	2	PRKAR1B; AC147651.2	#N/A
rs3801714	7	81830424	7q21.11	1	CACNA2D1	#N/A
rs12549518	8	128309591	8q24.21	2	CASC8; RP11-382A18.3	#N/A
rs6996866	8	128310155	8q24.21	1	CASC8	#N/A
rs283727	8	128313360	8q24.21	1	CASC8	#N/A
rs283728	8	128313500	8q24.21	1	CASC8	#N/A
rs4871015	8	128314516	8q24.21	1	CASC8	#N/A
rs283705	8	128317450	8q24.21	2	CASC8; -	#N/A
rs11781932	8	128330178	8q24.21	1	CASC8	#N/A
rs7002712	8	128341612	8q24.21	2	CASC8; -	#N/A
rs7838714	8	128343948	8q24.21	1	CASC8	#N/A
rs17465052	8	128354080	8q24.21	3	CASC8; RP11-382A18.2; -	#N/A
rs10098985	8	128355019	8q24.21	3	CASC8; RP11-382A18.2; -	#N/A
rs10097200	8	128363652	8q24.21	2	CASC8; RP11-382A18.2	#N/A
rs7002826	8	128364271	8q24.21	2	CASC8; RP11-382A18.2	#N/A
rs7007568	8	128364906	8q24.21	3	CASC8; RP11-382A18.2; -	#N/A
rs7842494	8	128366570	8q24.21	2	CASC8; RP11-382A18.2	#N/A
rs5022926	8	128366829	8q24.21	2	CASC8; RP11-382A18.2	#N/A
rs9297753	8	128375270	8q24.21	2	CASC8; RP11-382A18.2	#N/A
rs9283954	8	128375370	8q24.21	2	CASC8; RP11-382A18.2	#N/A
rs7831303	8	128376732	8q24.21	3	CASC8; RP11-382A18.2; -	#N/A
rs7815100	8	128376801	8q24.21	3	CASC8; RP11-382A18.2; -	#N/A
rs6988647	8	128377656	8q24.21	3	CASC8; RP11-382A18.2; -	#N/A
rs9692890	8	128377774	8q24.21	3	CASC8; RP11-382A18.2; -	#N/A
rs9693143	8	128378025	8q24.21	3	CASC8; RP11-382A18.2; -	#N/A
rs16902126	8	128382357	8q24.21	2	CASC8; RP11-382A18.2	#N/A
rs7815245	8	128383597	8q24.21	3	CASC8; RP11-382A18.2; -	#N/A
rs1562430	8	128387852	8q24.21	3	CASC8; RP11-382A18.2; -	Several neoplasias
rs7015780	8	128389507	8q24.21	2	CASC8; RP11-382A18.2	#N/A
rs2052701	8	133731794	8q24.22	1	TMEM71	#N/A
rs180204	8	133881244	8q24.22	1	TG	#N/A
rs2247583	8	14604752	8p22	1	SGCZ	#N/A
rs4733347	8	32376010	8p12	1	NRG1	#N/A
rs1108144	8	96404286	8q22.1	1	KB-1047C11.2	#N/A
rs11778211	8	96407360	8q22.1	1	KB-1047C11.2	#N/A

## Sheet: Table S6 DOR
SNP	chr	position	cytoband	n_annotated_genes	Annotated_SYMBOL_coll	DOR	DOR_tissue
rs12782552	10	21428541	10p12.31	2	C10orf113; NEBL	#N/A	#N/A
rs661893	10	30895478	10p11.23	1	-	#N/A	#N/A
rs793088	10	31364621	10p11.22	1	-	#N/A	#N/A
rs793094	10	31386822	10p11.22	1	-	#N/A	#N/A
rs12415110	10	37096338	10p11.21	1	-	#N/A	#N/A
rs2050502	10	44203201	10q11.21	1	-	#N/A	#N/A
rs12258494	10	44233503	10q11.21	1	TCEB1P30	#N/A	#N/A
rs4080021	10	44268654	10q11.21	1	RP11-272J7.4	#N/A	#N/A
rs12776000	10	60576687	10q21.1	2	BICC1; -	#N/A	#N/A
rs3912390	10	82776591	10q23.1	1	-	#N/A	#N/A
rs1398312	11	106279611	11q22.3	1	-	#N/A	#N/A
rs6656346	1	111103688	1p13.3	1	-	#N/A	#N/A
rs12136952	1	12661421	1p36.22	2	DHRS3; -	#N/A	#N/A
chr1_145556986_C_T	1	145556986	1q21.1	2	ANKRD35; -	#N/A	#N/A
chr1_145740514_C_T	1	145740514	1q21.1	1	PDZK1	#N/A	#N/A
chr1_150902203_A_T	1	150902203	1q21.3	1	SETDB1	#N/A	#N/A
chr1_150974311_A_G	1	150974311	1q21.3	1	FAM63A	#N/A	#N/A
rs6697813	1	15951743	1p36.21	1	DDI2	#N/A	#N/A
rs2250174	1	160950966	1q23.3	1	-	#N/A	#N/A
chr11_68446868_A_G	11	68446868	11q13.3	1	GAL	#N/A	#N/A
rs10798348	1	175194390	1q25.1	1	-	#N/A	#N/A
rs4652490	1	180217250	1q25.2	2	LHX4; -	#N/A	#N/A
rs4465241	1	199963622	1q32.1	1	-	#N/A	#N/A
rs3790840	1	200016460	1q32.1	1	NR5A2	#N/A	#N/A
rs12145049	1	203777741	1q32.1	2	ZC3H11A; RP11-397P13.6	#N/A	#N/A
rs17016036	1	210537248	1q32.2	1	HHAT	#N/A	#N/A
rs4767014	12	113264755	12q24.13	1	RPH3A	#N/A	#N/A
rs6560884	12	133142411	12q24.33	1	FBRSL1	#N/A	#N/A
chr12_133155424_A_G	12	133155424	12q24.33	1	FBRSL1	#N/A	#N/A
rs11118832	1	221884371	1q41	1	DUSP10	#N/A	#N/A
rs10784548	12	40762546	12q12	1	LRRK2	#N/A	#N/A
rs3759125	12	50343608	12q13.12	3	AQP2; RP11-469H8.6; RP11-469H8.8	#N/A	#N/A
rs9783504	12	821451	12p13.33	1	-	#N/A	#N/A
rs7315904	12	835074	12p13.33	1	-	#N/A	#N/A
rs249184	12	95340146	12q22	2	NDUFA12; -	#N/A	#N/A
rs9645898	13	101677816	13q32.3	1	NALCN-AS1	#N/A	#N/A
rs9557954	13	103576386	13q33.1	1	-	#N/A	#N/A
rs7325781	13	36080730	13q13.3	1	NBEA	#N/A	#N/A
rs1461962	13	36081790	13q13.3	1	NBEA	#N/A	#N/A
rs940595	15	24038267	15q11.2	1	-	#N/A	#N/A
rs4782165	16	14551039	16p13.12	3	PARN; AC092291.1; -	#N/A	#N/A
rs209451	16	22845744	16p12.2	1	HS3ST2	#N/A	#N/A
rs7206380	16	79471714	16q23.2	1	-	#N/A	#N/A
chr17_143542_A_G	17	143542	17p13.3	2	RPH3AL; -	#N/A	#N/A
chr17_36895206_A_G	17	36895206	17q12	2	PCGF2; CISD3	#N/A	#N/A
rs67892803	17	46088729	17q21.32	1	-	#N/A	#N/A
rs11654719	17	64340380	17q24.2	1	PRKCA	#N/A	#N/A
chr17_69121396_A_G	17	69121396	17q24.3	1	CASC17	#N/A	#N/A
chr17_69124724_C_T	17	69124724	17q24.3	1	CASC17	#N/A	#N/A
rs7214041	17	70401476	17q24.3	2	LINC00511; -	#N/A	#N/A
rs67284056	18	30696277	18q12.1	1	CCDC178	#N/A	#N/A
rs34871003	18	30842257	18q12.1	1	CCDC178	#N/A	#N/A
rs12402858	1	87845112	1p22.3	1	-	#N/A	#N/A
chr1_87859293_C_G	1	87859293	1p22.3	1	-	DOR	duct
rs11081370	18	8241986	18p11.23	1	PTPRM	#N/A	#N/A
rs773914	19	16859652	19p13.11	1	NWD1	#N/A	#N/A
rs8111858	19	4326239	19p13.3	2	FSD1; STAP2	#N/A	#N/A
rs62209634	20	32456862	20q11.22	1	-	#N/A	#N/A
rs6074037	20	44769666	20q13.12	1	-	#N/A	#N/A
rs12625828	20	48844585	20q13.13	1	-	#N/A	#N/A
rs2232073	20	6065731	20p12.3	1	FERMT1	#N/A	#N/A
rs4383344	2	120278171	2q14.2	1	SCTR	#N/A	#N/A
rs13408950	2	14682175	2p24.3	1	-	#N/A	#N/A
rs34501967	2	174869889	2q31.1	1	-	#N/A	#N/A
rs35463408	2	175619948	2q31.1	2	CHRNA1; AC018890.6	#N/A	#N/A
rs2873308	2	236566346	2q37.2	1	AGAP1	#N/A	#N/A
rs6730757	2	43541598	2p21	1	THADA	#N/A	#N/A
rs11720514	3	112113334	3q13.2	1	RP11-231E6.1	#N/A	#N/A
rs999802	3	112127280	3q13.2	2	RP11-231E6.1; -	#N/A	#N/A
rs1683813	3	128666029	3q21.3	2	RP11-723O4.6; KIAA1257	#N/A	#N/A
chr3_177443968_A_C	3	177443968	3q26.32	1	LINC00578	#N/A	#N/A
chr3_183881234_A_G	3	183881234	3q27.1	2	DVL3; EIF2B5	#N/A	#N/A
rs12152217	3	183935258	3q27.1	1	EIF2B5	#N/A	#N/A
rs11922997	3	34997498	3p22.3	1	-	#N/A	#N/A
rs2584051	3	3842821	3p26.2	3	LRRN1; SUMF1; -	DOR	duct
rs7635135	3	66892025	3p14.1	1	-	#N/A	#N/A
chr4_125576612_C_T	4	125576612	4q28.1	1	-	#N/A	#N/A
rs2391054	4	127343002	4q28.1	1	-	#N/A	#N/A
rs2706822	4	168362952	4q32.3	1	-	#N/A	#N/A
rs11734697	4	181125964	4q34.3	1	-	#N/A	#N/A
rs4689545	4	6767336	4p16.1	1	-	#N/A	#N/A
chr4_69266379_C_G	4	69266379	4q13.2	1	-	#N/A	#N/A
rs10032900	4	7491757	4p16.1	1	SORCS2	#N/A	#N/A
rs6869928	5	10589502	5p15.2	1	ANKRD33B	#N/A	#N/A
rs4702704	5	10591672	5p15.2	1	ANKRD33B	#N/A	#N/A
rs2736098	5	1294086	5p15.33	2	TERT; -	#N/A	#N/A
rs10079348	5	1384607	5p15.33	1	RP11-325I22.2	#N/A	#N/A
rs7717113	5	172781401	5q35.1	1	-	#N/A	#N/A
rs16888572	5	21718946	5p14.3	1	RP11-804N13.1	#N/A	#N/A
rs6453061	5	73771666	5q13.3	1	CTC-419K13.1	#N/A	#N/A
rs12206846	6	108238917	6q21	2	SEC63; -	#N/A	#N/A
chr6_109038333_A_G	6	109038333	6q21	1	-	#N/A	#N/A
rs74969259	6	23504700	6p22.3	1	-	#N/A	#N/A
rs761098	6	2449186	6p25.2	2	GMDS-AS1; -	#N/A	#N/A
rs12524673	6	25432769	6p22.2	3	LRRC16A; snoU13; -	#N/A	#N/A
rs9261418	6	30076660	6p22.1	2	TRIM31; TRIM31-AS1	#N/A	#N/A
chr6_41354653_C_T	6	41354653	6p21.1	1	-	#N/A	#N/A
chr6_41354872_A_C	6	41354872	6p21.1	1	-	#N/A	#N/A
chr6_41362013_G_T	6	41362013	6p21.1	1	-	#N/A	#N/A
rs4706458	6	71382765	6q13	1	SMAP1	#N/A	#N/A
rs2504748	6	71583804	6q13	1	B3GAT2	#N/A	#N/A
rs2647417	6	76435943	6q14.1	1	-	#N/A	#N/A
kgp3489492	7	102807820	7q22.1	1	-	#N/A	#N/A
rs62482372	7	102924512	7q22.1	1	DPY19L2P2	#N/A	#N/A
chr7_130488534_C_T	7	130488534	7q32.3	1	-	#N/A	#N/A
rs8175950	7	142661695	7q34	2	KEL; -	#N/A	#N/A
rs6957979	7	36982483	7p14.2	1	ELMO1	#N/A	#N/A
chr7_47538546_C_T	7	47538546	7p12.3	1	TNS3	#N/A	#N/A
chr7_587783_C_G	7	587783	7p22.3	2	PRKAR1B; AC147651.2	#N/A	#N/A
rs3801714	7	81830424	7q21.11	1	CACNA2D1	#N/A	#N/A
rs12549518	8	128309591	8q24.21	2	CASC8; RP11-382A18.3	#N/A	#N/A
rs6996866	8	128310155	8q24.21	1	CASC8	#N/A	#N/A
rs283727	8	128313360	8q24.21	1	CASC8	#N/A	#N/A
rs283728	8	128313500	8q24.21	1	CASC8	#N/A	#N/A
rs4871015	8	128314516	8q24.21	1	CASC8	#N/A	#N/A
rs283705	8	128317450	8q24.21	2	CASC8; -	#N/A	#N/A
rs11781932	8	128330178	8q24.21	1	CASC8	#N/A	#N/A
rs7002712	8	128341612	8q24.21	2	CASC8; -	#N/A	#N/A
rs7838714	8	128343948	8q24.21	1	CASC8	#N/A	#N/A
rs17465052	8	128354080	8q24.21	3	CASC8; RP11-382A18.2; -	#N/A	#N/A
rs10098985	8	128355019	8q24.21	3	CASC8; RP11-382A18.2; -	#N/A	#N/A
rs10097200	8	128363652	8q24.21	2	CASC8; RP11-382A18.2	#N/A	#N/A
rs7002826	8	128364271	8q24.21	2	CASC8; RP11-382A18.2	#N/A	#N/A
rs7007568	8	128364906	8q24.21	3	CASC8; RP11-382A18.2; -	#N/A	#N/A
rs7842494	8	128366570	8q24.21	2	CASC8; RP11-382A18.2	#N/A	#N/A
rs5022926	8	128366829	8q24.21	2	CASC8; RP11-382A18.2	#N/A	#N/A
rs9297753	8	128375270	8q24.21	2	CASC8; RP11-382A18.2	#N/A	#N/A
rs9283954	8	128375370	8q24.21	2	CASC8; RP11-382A18.2	#N/A	#N/A
rs7831303	8	128376732	8q24.21	3	CASC8; RP11-382A18.2; -	#N/A	#N/A
rs7815100	8	128376801	8q24.21	3	CASC8; RP11-382A18.2; -	#N/A	#N/A
rs6988647	8	128377656	8q24.21	3	CASC8; RP11-382A18.2; -	#N/A	#N/A
rs9692890	8	128377774	8q24.21	3	CASC8; RP11-382A18.2; -	#N/A	#N/A
rs9693143	8	128378025	8q24.21	3	CASC8; RP11-382A18.2; -	#N/A	#N/A
rs16902126	8	128382357	8q24.21	2	CASC8; RP11-382A18.2	#N/A	#N/A
rs7815245	8	128383597	8q24.21	3	CASC8; RP11-382A18.2; -	#N/A	#N/A
rs1562430	8	128387852	8q24.21	3	CASC8; RP11-382A18.2; -	#N/A	#N/A
rs7015780	8	128389507	8q24.21	2	CASC8; RP11-382A18.2	#N/A	#N/A
rs2052701	8	133731794	8q24.22	1	TMEM71	#N/A	#N/A
rs180204	8	133881244	8q24.22	1	TG	#N/A	#N/A
rs2247583	8	14604752	8p22	1	SGCZ	#N/A	#N/A
rs4733347	8	32376010	8p12	1	NRG1	#N/A	#N/A
rs1108144	8	96404286	8q22.1	1	KB-1047C11.2	#N/A	#N/A
rs11778211	8	96407360	8q22.1	1	KB-1047C11.2	#N/A	#N/A

## Sheet: Table S6 lncRNA_pancreas
SNP	chr	position	cytoband	n_annotated_genes	Annotated_SYMBOL_coll	lncRNA_pancreas
rs12782552	10	21428541	10p12.31	2	C10orf113; NEBL	#N/A
rs661893	10	30895478	10p11.23	1	-	#N/A
rs793088	10	31364621	10p11.22	1	-	#N/A
rs793094	10	31386822	10p11.22	1	-	#N/A
rs12415110	10	37096338	10p11.21	1	-	#N/A
rs2050502	10	44203201	10q11.21	1	-	#N/A
rs12258494	10	44233503	10q11.21	1	TCEB1P30	#N/A
rs4080021	10	44268654	10q11.21	1	RP11-272J7.4	#N/A
rs12776000	10	60576687	10q21.1	2	BICC1; -	#N/A
rs3912390	10	82776591	10q23.1	1	-	#N/A
rs1398312	11	106279611	11q22.3	1	-	#N/A
rs6656346	1	111103688	1p13.3	1	-	#N/A
rs12136952	1	12661421	1p36.22	2	DHRS3; -	#N/A
chr1_145556986_C_T	1	145556986	1q21.1	2	ANKRD35; -	#N/A
chr1_145740514_C_T	1	145740514	1q21.1	1	PDZK1	#N/A
chr1_150902203_A_T	1	150902203	1q21.3	1	SETDB1	#N/A
chr1_150974311_A_G	1	150974311	1q21.3	1	FAM63A	#N/A
rs6697813	1	15951743	1p36.21	1	DDI2	#N/A
rs2250174	1	160950966	1q23.3	1	-	#N/A
chr11_68446868_A_G	11	68446868	11q13.3	1	GAL	#N/A
rs10798348	1	175194390	1q25.1	1	-	#N/A
rs4652490	1	180217250	1q25.2	2	LHX4; -	#N/A
rs4465241	1	199963622	1q32.1	1	-	#N/A
rs3790840	1	200016460	1q32.1	1	NR5A2	#N/A
rs12145049	1	203777741	1q32.1	2	ZC3H11A; RP11-397P13.6	#N/A
rs17016036	1	210537248	1q32.2	1	HHAT	#N/A
rs4767014	12	113264755	12q24.13	1	RPH3A	#N/A
rs6560884	12	133142411	12q24.33	1	FBRSL1	#N/A
chr12_133155424_A_G	12	133155424	12q24.33	1	FBRSL1	#N/A
rs11118832	1	221884371	1q41	1	DUSP10	#N/A
rs10784548	12	40762546	12q12	1	LRRK2	#N/A
rs3759125	12	50343608	12q13.12	3	AQP2; RP11-469H8.6; RP11-469H8.8	#N/A
rs9783504	12	821451	12p13.33	1	-	#N/A
rs7315904	12	835074	12p13.33	1	-	#N/A
rs249184	12	95340146	12q22	2	NDUFA12; -	#N/A
rs9645898	13	101677816	13q32.3	1	NALCN-AS1	#N/A
rs9557954	13	103576386	13q33.1	1	-	#N/A
rs7325781	13	36080730	13q13.3	1	NBEA	#N/A
rs1461962	13	36081790	13q13.3	1	NBEA	#N/A
rs940595	15	24038267	15q11.2	1	-	#N/A
rs4782165	16	14551039	16p13.12	3	PARN; AC092291.1; -	#N/A
rs209451	16	22845744	16p12.2	1	HS3ST2	#N/A
rs7206380	16	79471714	16q23.2	1	-	#N/A
chr17_143542_A_G	17	143542	17p13.3	2	RPH3AL; -	#N/A
chr17_36895206_A_G	17	36895206	17q12	2	PCGF2; CISD3	#N/A
rs67892803	17	46088729	17q21.32	1	-	#N/A
rs11654719	17	64340380	17q24.2	1	PRKCA	#N/A
chr17_69121396_A_G	17	69121396	17q24.3	1	CASC17	#N/A
chr17_69124724_C_T	17	69124724	17q24.3	1	CASC17	#N/A
rs7214041	17	70401476	17q24.3	2	LINC00511; -	lncRNA
rs67284056	18	30696277	18q12.1	1	CCDC178	#N/A
rs34871003	18	30842257	18q12.1	1	CCDC178	#N/A
rs12402858	1	87845112	1p22.3	1	-	#N/A
chr1_87859293_C_G	1	87859293	1p22.3	1	-	#N/A
rs11081370	18	8241986	18p11.23	1	PTPRM	#N/A
rs773914	19	16859652	19p13.11	1	NWD1	#N/A
rs8111858	19	4326239	19p13.3	2	FSD1; STAP2	#N/A
rs62209634	20	32456862	20q11.22	1	-	#N/A
rs6074037	20	44769666	20q13.12	1	-	#N/A
rs12625828	20	48844585	20q13.13	1	-	#N/A
rs2232073	20	6065731	20p12.3	1	FERMT1	#N/A
rs4383344	2	120278171	2q14.2	1	SCTR	#N/A
rs13408950	2	14682175	2p24.3	1	-	#N/A
rs34501967	2	174869889	2q31.1	1	-	#N/A
rs35463408	2	175619948	2q31.1	2	CHRNA1; AC018890.6	#N/A
rs2873308	2	236566346	2q37.2	1	AGAP1	#N/A
rs6730757	2	43541598	2p21	1	THADA	#N/A
rs11720514	3	112113334	3q13.2	1	RP11-231E6.1	#N/A
rs999802	3	112127280	3q13.2	2	RP11-231E6.1; -	#N/A
rs1683813	3	128666029	3q21.3	2	RP11-723O4.6; KIAA1257	#N/A
chr3_177443968_A_C	3	177443968	3q26.32	1	LINC00578	lncRNA
chr3_183881234_A_G	3	183881234	3q27.1	2	DVL3; EIF2B5	#N/A
rs12152217	3	183935258	3q27.1	1	EIF2B5	#N/A
rs11922997	3	34997498	3p22.3	1	-	#N/A
rs2584051	3	3842821	3p26.2	3	LRRN1; SUMF1; -	#N/A
rs7635135	3	66892025	3p14.1	1	-	#N/A
chr4_125576612_C_T	4	125576612	4q28.1	1	-	#N/A
rs2391054	4	127343002	4q28.1	1	-	#N/A
rs2706822	4	168362952	4q32.3	1	-	#N/A
rs11734697	4	181125964	4q34.3	1	-	#N/A
rs4689545	4	6767336	4p16.1	1	-	#N/A
chr4_69266379_C_G	4	69266379	4q13.2	1	-	#N/A
rs10032900	4	7491757	4p16.1	1	SORCS2	#N/A
rs6869928	5	10589502	5p15.2	1	ANKRD33B	#N/A
rs4702704	5	10591672	5p15.2	1	ANKRD33B	#N/A
rs2736098	5	1294086	5p15.33	2	TERT; -	#N/A
rs10079348	5	1384607	5p15.33	1	RP11-325I22.2	#N/A
rs7717113	5	172781401	5q35.1	1	-	#N/A
rs16888572	5	21718946	5p14.3	1	RP11-804N13.1	#N/A
rs6453061	5	73771666	5q13.3	1	CTC-419K13.1	#N/A
rs12206846	6	108238917	6q21	2	SEC63; -	#N/A
chr6_109038333_A_G	6	109038333	6q21	1	-	#N/A
rs74969259	6	23504700	6p22.3	1	-	#N/A
rs761098	6	2449186	6p25.2	2	GMDS-AS1; -	lncRNA
rs12524673	6	25432769	6p22.2	3	LRRC16A; snoU13; -	#N/A
rs9261418	6	30076660	6p22.1	2	TRIM31; TRIM31-AS1	#N/A
chr6_41354653_C_T	6	41354653	6p21.1	1	-	#N/A
chr6_41354872_A_C	6	41354872	6p21.1	1	-	#N/A
chr6_41362013_G_T	6	41362013	6p21.1	1	-	#N/A
rs4706458	6	71382765	6q13	1	SMAP1	#N/A
rs2504748	6	71583804	6q13	1	B3GAT2	#N/A
rs2647417	6	76435943	6q14.1	1	-	#N/A
kgp3489492	7	102807820	7q22.1	1	-	#N/A
rs62482372	7	102924512	7q22.1	1	DPY19L2P2	#N/A
chr7_130488534_C_T	7	130488534	7q32.3	1	-	#N/A
rs8175950	7	142661695	7q34	2	KEL; -	#N/A
rs6957979	7	36982483	7p14.2	1	ELMO1	#N/A
chr7_47538546_C_T	7	47538546	7p12.3	1	TNS3	#N/A
chr7_587783_C_G	7	587783	7p22.3	2	PRKAR1B; AC147651.2	#N/A
rs3801714	7	81830424	7q21.11	1	CACNA2D1	#N/A
rs12549518	8	128309591	8q24.21	2	CASC8; RP11-382A18.3	lncRNA
rs6996866	8	128310155	8q24.21	1	CASC8	lncRNA
rs283727	8	128313360	8q24.21	1	CASC8	lncRNA
rs283728	8	128313500	8q24.21	1	CASC8	lncRNA
rs4871015	8	128314516	8q24.21	1	CASC8	lncRNA
rs283705	8	128317450	8q24.21	2	CASC8; -	lncRNA
rs11781932	8	128330178	8q24.21	1	CASC8	lncRNA
rs7002712	8	128341612	8q24.21	2	CASC8; -	lncRNA
rs7838714	8	128343948	8q24.21	1	CASC8	lncRNA
rs17465052	8	128354080	8q24.21	3	CASC8; RP11-382A18.2; -	lncRNA
rs10098985	8	128355019	8q24.21	3	CASC8; RP11-382A18.2; -	lncRNA
rs10097200	8	128363652	8q24.21	2	CASC8; RP11-382A18.2	lncRNA
rs7002826	8	128364271	8q24.21	2	CASC8; RP11-382A18.2	lncRNA
rs7007568	8	128364906	8q24.21	3	CASC8; RP11-382A18.2; -	lncRNA
rs7842494	8	128366570	8q24.21	2	CASC8; RP11-382A18.2	lncRNA
rs5022926	8	128366829	8q24.21	2	CASC8; RP11-382A18.2	lncRNA
rs9297753	8	128375270	8q24.21	2	CASC8; RP11-382A18.2	lncRNA
rs9283954	8	128375370	8q24.21	2	CASC8; RP11-382A18.2	lncRNA
rs7831303	8	128376732	8q24.21	3	CASC8; RP11-382A18.2; -	lncRNA
rs7815100	8	128376801	8q24.21	3	CASC8; RP11-382A18.2; -	lncRNA
rs6988647	8	128377656	8q24.21	3	CASC8; RP11-382A18.2; -	lncRNA
rs9692890	8	128377774	8q24.21	3	CASC8; RP11-382A18.2; -	lncRNA
rs9693143	8	128378025	8q24.21	3	CASC8; RP11-382A18.2; -	lncRNA
rs16902126	8	128382357	8q24.21	2	CASC8; RP11-382A18.2	lncRNA
rs7815245	8	128383597	8q24.21	3	CASC8; RP11-382A18.2; -	lncRNA
rs1562430	8	128387852	8q24.21	3	CASC8; RP11-382A18.2; -	lncRNA
rs7015780	8	128389507	8q24.21	2	CASC8; RP11-382A18.2	lncRNA
rs2052701	8	133731794	8q24.22	1	TMEM71	#N/A
rs180204	8	133881244	8q24.22	1	TG	#N/A
rs2247583	8	14604752	8p22	1	SGCZ	#N/A
rs4733347	8	32376010	8p12	1	NRG1	#N/A
rs1108144	8	96404286	8q22.1	1	KB-1047C11.2	#N/A
rs11778211	8	96407360	8q22.1	1	KB-1047C11.2	#N/A

## Sheet: Table S6 chr_marks
SNP	chr	position	cytoband	n_annotated_genes	Annotated_SYMBOL_coll	nmarks	marks	tissues_marks	ratio	unique_mark_coll	n_unique_marks
rs12782552	10	21428541	10p12.31	2	C10orf113; NEBL	2	H3K27me3; H3K4me1	pancreas; endocrine	1/1; 1/2	H3K4me1; H3K27me3	2
rs661893	10	30895478	10p11.23	1	-	6	H3K27ac; H3K27me3; H3K36me3; H3K4me1; H3K4me1; H3K9me3	endocrine; pancreas; pancreas; pancreas; endocrine; pancreas	1/2; 1/1; 1/1; 1/1; 1/2; 1/1	H3K27ac; H3K4me1; H3K27me3; H3K36me3; H3K9me3	5
rs793088	10	31364621	10p11.22	1	-	2	H3K4me1; H3K9me3	endocrine; pancreas	1/2; 1/1	H3K4me1; H3K9me3	2
rs793094	10	31386822	10p11.22	1	-	1	H3K27me3	pancreas	1/1	H3K27me3	1
rs12415110	10	37096338	10p11.21	1	-	#N/A	#N/A	#N/A	#N/A	#N/A	#N/A
rs2050502	10	44203201	10q11.21	1	-	8	DNase; FAIRE; H3K27me3; H3K36me3; H3K4me1; H3K4me3; H3K9me3	body_pancreas; pancreas; pancreas; pancreas; pancreas; pancreas; pancreas	NA; 1/2; 1/1; 1/1; 1/1; 1/1; 1/1	DNase; FAIRE; H3K27me3; H3K36me3; H3K4me1; H3K4me3; H3K9me3	7
rs12258494	10	44233503	10q11.21	1	TCEB1P30	4	DNase; H3K27me3; H3K36me3; H3K9me3	body_pancreas; endocrine; pancreas; pancreas	NA; 1/1; 1/1; 1/1	DNase; H3K27me3; H3K36me3; H3K9me3	4
rs4080021	10	44268654	10q11.21	1	RP11-272J7.4	#N/A	#N/A	#N/A	#N/A	#N/A	#N/A
rs12776000	10	60576687	10q21.1	2	BICC1; -	3	FAIRE; H3K27me3; H3K4me1	pancreas; pancreas; pancreas	1/2; 1/1; 1/1	FAIRE; H3K27me3; H3K4me1	3
rs3912390	10	82776591	10q23.1	1	-	1	H3K4me1	endocrine	1/2	H3K4me1	1
rs1398312	11	106279611	11q22.3	1	-	2	H3K36me3; RAMPAGE	pancreas; body_pancreas	1/1; NA	RAMPAGE; H3K36me3	2
rs6656346	1	111103688	1p13.3	1	-	3	DNase; FAIRE; H3K4me3	body_pancreas; pancreas; pancreas	NA; 1/2; 1/1	DNase; FAIRE; H3K4me3	3
rs12136952	1	12661421	1p36.22	2	DHRS3; -	10	CTCF; DNase; DNase; FAIRE; H3K36me3; H3K4me1; H3K4me1; H3K4me3	pancreas; body_pancreas; pancreas; pancreas; pancreas; pancreas; endocrine; pancreas	1/1; NA; 1/5; 1/2; 1/1; 1/1; 1/2; 1/1	DNase; H3K4me1; CTCF; FAIRE; H3K36me3; H3K4me3	6
chr1_145556986_C_T	1	145556986	1q21.1	2	ANKRD35; -	3	FAIRE; H3K36me3; H3K4me1	pancreas; pancreas; pancreas	1/2; 1/1; 1/1	FAIRE; H3K36me3; H3K4me1	3
chr1_145740514_C_T	1	145740514	1q21.1	1	PDZK1	3	FAIRE; H3K27ac; H3K4me1	pancreas; endocrine; pancreas	1/2; 1/2; 1/1	H3K27ac; FAIRE; H3K4me1	3
chr1_150902203_A_T	1	150902203	1q21.3	1	SETDB1	4	FAIRE; H3K36me3; H3K36me3; H3K9me3	pancreas; pancreas; endocrine; pancreas	1/2; 1/1; 1/2; 1/1	H3K36me3; FAIRE; H3K9me3	3
chr1_150974311_A_G	1	150974311	1q21.3	1	FAM63A	8	DNase; DNase; H3K27ac; H3K36me3; H3K36me3; H3K4me1; H3K4me1	pancreas; body_pancreas; endocrine; pancreas; endocrine; pancreas; endocrine	1/5; NA; 1/2; 1/1; 1/2; 1/1; 1/2	DNase; H3K27ac; H3K36me3; H3K4me1	4
rs6697813	1	15951743	1p36.21	1	DDI2	7	FAIRE; H3K27ac; H3K27me3; H3K36me3; H3K4me1; H3K4me1; H3K4me3	pancreas; endocrine; pancreas; pancreas; pancreas; endocrine; pancreas	1/2; 1/2; 1/1; 1/1; 1/1; 1/2; 1/1	H3K27ac; H3K4me1; FAIRE; H3K27me3; H3K36me3; H3K4me3	6
rs2250174	1	160950966	1q23.3	1	-	5	FAIRE; H3K27me3; H3K36me3; H3K36me3; H3K4me1	pancreas; endocrine; endocrine; pancreas; pancreas	1/2; 1/1; 1/2; 1/1; 1/1	H3K27me3; H3K36me3; FAIRE; H3K4me1	4
chr11_68446868_A_G	11	68446868	11q13.3	1	GAL	6	DNase; FAIRE; H3K27me3; H3K27me3; H3K4me1; H3K9me3	body_pancreas; pancreas; pancreas; endocrine; pancreas; pancreas	NA; 1/2; 1/1; 1/1; 1/1; 1/1	DNase; H3K27me3; FAIRE; H3K4me1; H3K9me3	5
rs10798348	1	175194390	1q25.1	1	-	2	H3K27me3; H3K9me3	endocrine; pancreas	1/1; 1/1	H3K27me3; H3K9me3	2
rs4652490	1	180217250	1q25.2	2	LHX4; -	5	DNase; FAIRE; H3K36me3; H3K4me3; H3K9me3	body_pancreas; pancreas; endocrine; pancreas; pancreas	NA; 1/2; 1/2; 1/1; 1/1	DNase; H3K36me3; FAIRE; H3K4me3; H3K9me3	5
rs4465241	1	199963622	1q32.1	1	-	1	FAIRE	pancreas	1/2	FAIRE	1
rs3790840	1	200016460	1q32.1	1	NR5A2	10	DNase; FAIRE; H3K27ac; H3K27me3; H3K27me3; H3K36me3; H3K36me3; H3K4me1; H3K4me3; H3K9me3	pancreas; pancreas; endocrine; pancreas; endocrine; pancreas; endocrine; pancreas; pancreas; pancreas	1/5; 1/2; 1/2; 1/1; 1/1; 1/1; 1/2; 1/1; 1/1; 1/1	H3K27ac; H3K27me3; H3K36me3; DNase; FAIRE; H3K4me1; H3K4me3; H3K9me3	8
rs12145049	1	203777741	1q32.1	2	ZC3H11A; RP11-397P13.6	3	H3K27ac; H3K36me3; H3K4me1	endocrine; endocrine; endocrine	1/2; 1/2; 1/2	H3K27ac; H3K36me3; H3K4me1	3
rs17016036	1	210537248	1q32.2	1	HHAT	2	FAIRE; H3K36me3	pancreas; pancreas	1/2; 1/1	FAIRE; H3K36me3	2
rs4767014	12	113264755	12q24.13	1	RPH3A	1	H3K36me3	endocrine	1/2	H3K36me3	1
rs6560884	12	133142411	12q24.33	1	FBRSL1	4	H3K36me3; H3K36me3; H3K4me1; H3K4me3	endocrine; pancreas; pancreas; pancreas	1/2; 1/1; 1/1; 1/1	H3K36me3; H3K4me1; H3K4me3	3
chr12_133155424_A_G	12	133155424	12q24.33	1	FBRSL1	3	FAIRE; H3K36me3; H3K9me3	pancreas; pancreas; pancreas	1/2; 1/1; 1/1	FAIRE; H3K36me3; H3K9me3	3
rs11118832	1	221884371	1q41	1	DUSP10	5	DNase; DNase; FAIRE; H3K27ac; H3K4me1	pancreas; body_pancreas; pancreas; endocrine; pancreas	1/5; NA; 1/2; 1/2; 1/1	DNase; H3K27ac; FAIRE; H3K4me1	4
rs10784548	12	40762546	12q12	1	LRRK2	1	H3K4me1	endocrine	1/2	H3K4me1	1
rs3759125	12	50343608	12q13.12	3	AQP2; RP11-469H8.6; RP11-469H8.8	1	H3K9me3	pancreas	1/1	H3K9me3	1
rs9783504	12	821451	12p13.33	1	-	2	H3K27me3; H3K36me3	endocrine; pancreas	1/1; 1/1	H3K27me3; H3K36me3	2
rs7315904	12	835074	12p13.33	1	-	1	H3K27me3	pancreas	1/1	H3K27me3	1
rs249184	12	95340146	12q22	2	NDUFA12; -	3	H3K27me3; H3K4me1; H3K9me3	pancreas; pancreas; pancreas	1/1; 1/1; 1/1	H3K27me3; H3K4me1; H3K9me3	3
rs9645898	13	101677816	13q32.3	1	NALCN-AS1	2	FAIRE; H3K27me3	pancreas; pancreas	1/2; 1/1	FAIRE; H3K27me3	2
rs9557954	13	103576386	13q33.1	1	-	#N/A	#N/A	#N/A	#N/A	#N/A	#N/A
rs7325781	13	36080730	13q13.3	1	NBEA	1	H3K27me3	pancreas	1/1	H3K27me3	1
rs1461962	13	36081790	13q13.3	1	NBEA	1	H3K27me3	pancreas	1/1	H3K27me3	1
rs940595	15	24038267	15q11.2	1	-	6	H3K27me3; H3K27me3; H3K36me3; H3K4me3; H3K9me3; H3K9me3	endocrine; pancreas; endocrine; pancreas; endocrine; pancreas	1/1; 1/1; 1/2; 1/1; 1/1; 1/1	H3K27me3; H3K36me3; H3K9me3; H3K4me3	4
rs4782165	16	14551039	16p13.12	3	PARN; AC092291.1; -	#N/A	#N/A	#N/A	#N/A	#N/A	#N/A
rs209451	16	22845744	16p12.2	1	HS3ST2	#N/A	#N/A	#N/A	#N/A	#N/A	#N/A
rs7206380	16	79471714	16q23.2	1	-	4	FAIRE; H3K4me1; H3K4me3; H3K9me3	pancreas; pancreas; pancreas; pancreas	1/2; 1/1; 1/1; 1/1	FAIRE; H3K4me1; H3K4me3; H3K9me3	4
chr17_143542_A_G	17	143542	17p13.3	2	RPH3AL; -	3	H3K36me3; H3K36me3; H3K4me1	pancreas; endocrine; pancreas	1/1; 1/2; 1/1	H3K36me3; H3K4me1	2
chr17_36895206_A_G	17	36895206	17q12	2	PCGF2; CISD3	7	H3K27ac; H3K36me3; H3K36me3; H3K4me1; H3K4me3; H3K9me3	endocrine; endocrine; pancreas; pancreas; pancreas; pancreas	1/2; 2/2; 1/1; 1/1; 1/1; 1/1	H3K27ac; H3K36me3; H3K4me1; H3K4me3; H3K9me3	5
rs67892803	17	46088729	17q21.32	1	-	3	H3K27me3; H3K4me3; H3K9ac	pancreas; pancreas; endocrine	1/1; 1/1; 1/2	H3K9ac; H3K27me3; H3K4me3	3
rs11654719	17	64340380	17q24.2	1	PRKCA	4	FAIRE; H3K4me1; H3K4me1; H3K9me3	pancreas; endocrine; pancreas; pancreas	1/2; 1/2; 1/1; 1/1	H3K4me1; FAIRE; H3K9me3	3
chr17_69121396_A_G	17	69121396	17q24.3	1	CASC17	2	H3K36me3; H3K9me3	endocrine; endocrine	1/2; 1/1	H3K36me3; H3K9me3	2
chr17_69124724_C_T	17	69124724	17q24.3	1	CASC17	#N/A	#N/A	#N/A	#N/A	#N/A	#N/A
rs7214041	17	70401476	17q24.3	2	LINC00511; -	5	DNase; H3K27ac; H3K4me1; H3K9ac	pancreas; endocrine; endocrine; endocrine	1/5; 1/2; 2/2; 1/2	H3K27ac; H3K4me1; H3K9ac; DNase	4
rs67284056	18	30696277	18q12.1	1	CCDC178	6	FAIRE; H3K4me1; H3K4me1; H3K4me3; H3K9ac; H3K9me3	pancreas; pancreas; endocrine; pancreas; endocrine; pancreas	1/2; 1/1; 1/2; 1/1; 1/2; 1/1	H3K4me1; H3K9ac; FAIRE; H3K4me3; H3K9me3	5
rs34871003	18	30842257	18q12.1	1	CCDC178	#N/A	#N/A	#N/A	#N/A	#N/A	#N/A
rs12402858	1	87845112	1p22.3	1	-	3	H3K27me3; H3K4me1; H3K9me3	pancreas; endocrine; endocrine	1/1; 1/2; 1/1	H3K4me1; H3K9me3; H3K27me3	3
chr1_87859293_C_G	1	87859293	1p22.3	1	-	2	H3K4me1; H3K9me3	pancreas; pancreas	1/1; 1/1	H3K4me1; H3K9me3	2
rs11081370	18	8241986	18p11.23	1	PTPRM	6	FAIRE; H3K27me3; H3K36me3; H3K36me3; H3K4me1	pancreas; pancreas; pancreas; endocrine; endocrine	1/2; 1/1; 1/1; 1/2; 2/2	H3K36me3; H3K4me1; FAIRE; H3K27me3	4
rs773914	19	16859652	19p13.11	1	NWD1	#N/A	#N/A	#N/A	#N/A	#N/A	#N/A
rs8111858	19	4326239	19p13.3	2	FSD1; STAP2	6	H3K27ac; H3K27me3; H3K36me3; H3K36me3; H3K4me1; H3K4me3	endocrine; endocrine; endocrine; pancreas; pancreas; pancreas	1/2; 1/1; 1/2; 1/1; 1/1; 1/1	H3K27ac; H3K27me3; H3K36me3; H3K4me1; H3K4me3	5
rs62209634	20	32456862	20q11.22	1	-	1	H3K9me3	pancreas	1/1	H3K9me3	1
rs6074037	20	44769666	20q13.12	1	-	3	H3K27me3; H3K27me3; H3K4me1	endocrine; pancreas; endocrine	1/1; 1/1; 1/2	H3K27me3; H3K4me1	2
rs12625828	20	48844585	20q13.13	1	-	2	H3K27me3; H3K9me3	endocrine; pancreas	1/1; 1/1	H3K27me3; H3K9me3	2
rs2232073	20	6065731	20p12.3	1	FERMT1	3	H3K27me3; H3K36me3; H3K9me3	endocrine; pancreas; pancreas	1/1; 1/1; 1/1	H3K27me3; H3K36me3; H3K9me3	3
rs4383344	2	120278171	2q14.2	1	SCTR	7	FAIRE; H3K27ac; H3K36me3; H3K4me1; H3K4me1; H3K4me3; H3K9me3	pancreas; endocrine; pancreas; pancreas; endocrine; pancreas; pancreas	1/2; 1/2; 1/1; 1/1; 1/2; 1/1; 1/1	H3K27ac; H3K4me1; FAIRE; H3K36me3; H3K4me3; H3K9me3	6
rs13408950	2	14682175	2p24.3	1	-	4	H3K27me3; H3K36me3; H3K4me1; H3K9me3	pancreas; pancreas; endocrine; pancreas	1/1; 1/1; 1/2; 1/1	H3K4me1; H3K27me3; H3K36me3; H3K9me3	4
rs34501967	2	174869889	2q31.1	1	-	2	FAIRE; H3K4me1	pancreas; endocrine	1/2; 1/2	H3K4me1; FAIRE	2
rs35463408	2	175619948	2q31.1	2	CHRNA1; AC018890.6	2	FAIRE; H3K9me3	pancreas; pancreas	1/2; 1/1	FAIRE; H3K9me3	2
rs2873308	2	236566346	2q37.2	1	AGAP1	4	DNase; H3K36me3; H3K4me1; H3K4me1	body_pancreas; pancreas; endocrine; pancreas	NA; 1/1; 1/2; 1/1	DNase; H3K4me1; H3K36me3	3
rs6730757	2	43541598	2p21	1	THADA	7	DNase; FAIRE; H3K27ac; H3K27me3; H3K4me1; H3K4me1	pancreas; pancreas; endocrine; pancreas; endocrine; pancreas	1/5; 1/2; 1/2; 1/1; 1/2; 1/1	H3K27ac; H3K4me1; DNase; FAIRE; NA; H3K27me3	6
rs11720514	3	112113334	3q13.2	1	RP11-231E6.1	2	H3K27me3; H3K36me3	endocrine; endocrine	1/1; 1/2	H3K27me3; H3K36me3	2
rs999802	3	112127280	3q13.2	2	RP11-231E6.1; -	1	H3K4me1	endocrine	1/2	H3K4me1	1
rs1683813	3	128666029	3q21.3	2	RP11-723O4.6; KIAA1257	1	H3K27me3	pancreas	1/1	H3K27me3	1
chr3_177443968_A_C	3	177443968	3q26.32	1	LINC00578	2	H3K4me1; H3K9me3	endocrine; endocrine	1/2; 1/1	H3K4me1; H3K9me3	2
chr3_183881234_A_G	3	183881234	3q27.1	2	DVL3; EIF2B5	5	FAIRE; H3K36me3; H3K36me3; H3K4me1; H3K9ac	pancreas; endocrine; pancreas; pancreas; endocrine	1/2; 1/2; 1/1; 1/1; 1/2	H3K36me3; H3K9ac; FAIRE; H3K4me1	4
rs12152217	3	183935258	3q27.1	1	EIF2B5	#N/A	#N/A	#N/A	#N/A	#N/A	#N/A
rs11922997	3	34997498	3p22.3	1	-	2	H3K36me3; H3K4me1	endocrine; endocrine	1/2; 1/2	H3K36me3; H3K4me1	2
rs2584051	3	3842821	3p26.2	3	LRRN1; SUMF1; -	8	DNase; FAIRE; H3K27me3; H3K4me1; H3K4me3; H3K4me3; H3K9ac	body_pancreas; pancreas; endocrine; pancreas; pancreas; endocrine; endocrine	NA; 1/2; 1/1; 1/1; 1/1; 1/1; 1/2	DNase; H3K27me3; H3K4me3; H3K9ac; FAIRE; H3K4me1	6
rs7635135	3	66892025	3p14.1	1	-	#N/A	#N/A	#N/A	#N/A	#N/A	#N/A
chr4_125576612_C_T	4	125576612	4q28.1	1	-	#N/A	#N/A	#N/A	#N/A	#N/A	#N/A
rs2391054	4	127343002	4q28.1	1	-	#N/A	#N/A	#N/A	#N/A	#N/A	#N/A
rs2706822	4	168362952	4q32.3	1	-	1	H3K9me3	endocrine	1/1	H3K9me3	1
rs11734697	4	181125964	4q34.3	1	-	3	H3K27me3; H3K36me3; H3K4me1	pancreas; endocrine; endocrine	1/1; 1/2; 1/2	H3K36me3; H3K4me1; H3K27me3	3
rs4689545	4	6767336	4p16.1	1	-	4	FAIRE; H3K27me3; H3K36me3; H3K4me1	pancreas; pancreas; pancreas; pancreas	1/2; 1/1; 1/1; 1/1	FAIRE; H3K27me3; H3K36me3; H3K4me1	4
chr4_69266379_C_G	4	69266379	4q13.2	1	-	2	H3K27me3; H3K36me3	pancreas; endocrine	1/1; 1/2	H3K36me3; H3K27me3	2
rs10032900	4	7491757	4p16.1	1	SORCS2	#N/A	#N/A	#N/A	#N/A	#N/A	#N/A
rs6869928	5	10589502	5p15.2	1	ANKRD33B	6	H3K27me3; H3K27me3; H3K36me3; H3K36me3; H3K9me3; H3K9me3	endocrine; pancreas; endocrine; pancreas; pancreas; endocrine	1/1; 1/1; 1/2; 1/1; 1/1; 1/1	H3K27me3; H3K36me3; H3K9me3	3
rs4702704	5	10591672	5p15.2	1	ANKRD33B	1	H3K27me3	pancreas	1/1	H3K27me3	1
rs2736098	5	1294086	5p15.33	2	TERT; -	4	H3K27me3; H3K36me3; H3K4me1; H3K9me3	endocrine; pancreas; pancreas; pancreas	1/1; 1/1; 1/1; 1/1	H3K27me3; H3K36me3; H3K4me1; H3K9me3	4
rs10079348	5	1384607	5p15.33	1	RP11-325I22.2	3	FAIRE; H3K36me3; H3K4me1	pancreas; endocrine; pancreas	1/2; 1/2; 1/1	H3K36me3; FAIRE; H3K4me1	3
rs7717113	5	172781401	5q35.1	1	-	3	H3K27me3; H3K36me3; H3K36me3	pancreas; endocrine; pancreas	1/1; 1/2; 1/1	H3K36me3; H3K27me3	2
rs16888572	5	21718946	5p14.3	1	RP11-804N13.1	3	FAIRE; H3K27me3; H3K36me3	pancreas; pancreas; endocrine	1/2; 1/1; 1/2	H3K36me3; FAIRE; H3K27me3	3
rs6453061	5	73771666	5q13.3	1	CTC-419K13.1	3	H3K27me3; H3K27me3; H3K36me3	pancreas; endocrine; endocrine	1/1; 1/1; 1/2	H3K27me3; H3K36me3	2
rs12206846	6	108238917	6q21	2	SEC63; -	5	H3K36me3; H3K36me3; H3K9me3; H3K9me3	endocrine; pancreas; endocrine; pancreas	2/2; 1/1; 1/1; 1/1	H3K36me3; H3K9me3	2
chr6_109038333_A_G	6	109038333	6q21	1	-	5	FAIRE; H3K36me3; H3K4me1; H3K4me3; H3K9me3	pancreas; pancreas; pancreas; pancreas; pancreas	1/2; 1/1; 1/1; 1/1; 1/1	FAIRE; H3K36me3; H3K4me1; H3K4me3; H3K9me3	5
rs74969259	6	23504700	6p22.3	1	-	3	H3K27me3; H3K4me1; H3K9me3	pancreas; endocrine; pancreas	1/1; 1/2; 1/1	H3K4me1; H3K27me3; H3K9me3	3
rs761098	6	2449186	6p25.2	2	GMDS-AS1; -	6	CTCF; DNase; FAIRE; H3K4me1	pancreas; pancreas; pancreas; pancreas	1/1; 2/5; 2/2; 1/1	CTCF; DNase; FAIRE; H3K4me1	4
rs12524673	6	25432769	6p22.2	3	LRRC16A; snoU13; -	4	H3K27me3; H3K36me3; H3K4me1	pancreas; endocrine; endocrine	1/1; 1/2; 2/2	H3K36me3; H3K4me1; H3K27me3	3
rs9261418	6	30076660	6p22.1	2	TRIM31; TRIM31-AS1	5	H3K27me3; H3K27me3; H3K36me3; H3K4me3; H3K9me3	endocrine; pancreas; pancreas; pancreas; pancreas	1/1; 1/1; 1/1; 1/1; 1/1	H3K27me3; H3K36me3; H3K4me3; H3K9me3	4
chr6_41354653_C_T	6	41354653	6p21.1	1	-	3	H3K27me3; H3K36me3; H3K4me1	endocrine; pancreas; pancreas	1/1; 1/1; 1/1	H3K27me3; H3K36me3; H3K4me1	3
chr6_41354872_A_C	6	41354872	6p21.1	1	-	2	H3K27me3; H3K4me1	endocrine; pancreas	1/1; 1/1	H3K27me3; H3K4me1	2
chr6_41362013_G_T	6	41362013	6p21.1	1	-	3	H3K27me3; H3K27me3; H3K9me3	pancreas; endocrine; endocrine	1/1; 1/1; 1/1	H3K27me3; H3K9me3	2
rs4706458	6	71382765	6q13	1	SMAP1	5	FAIRE; H3K27me3; H3K4me1; H3K4me3; H3K9me3	pancreas; pancreas; pancreas; pancreas; pancreas	1/2; 1/1; 1/1; 1/1; 1/1	FAIRE; H3K27me3; H3K4me1; H3K4me3; H3K9me3	5
rs2504748	6	71583804	6q13	1	B3GAT2	1	H3K9me3	endocrine	1/1	H3K9me3	1
rs2647417	6	76435943	6q14.1	1	-	3	FAIRE; H3K4me1; H3K4me1	pancreas; pancreas; endocrine	1/2; 1/1; 1/2	H3K4me1; FAIRE	2
kgp3489492	7	102807820	7q22.1	1	-	1	H3K4me1	pancreas	1/1	H3K4me1	1
rs62482372	7	102924512	7q22.1	1	DPY19L2P2	#N/A	#N/A	#N/A	#N/A	#N/A	#N/A
chr7_130488534_C_T	7	130488534	7q32.3	1	-	2	H3K27me3; H3K4me1	endocrine; pancreas	1/1; 1/1	H3K27me3; H3K4me1	2
rs8175950	7	142661695	7q34	2	KEL; -	6	H3K27me3; H3K27me3; H3K36me3; H3K4me1; H3K4me3; H3K9me3	endocrine; pancreas; pancreas; pancreas; pancreas; pancreas	1/1; 1/1; 1/1; 1/1; 1/1; 1/1	H3K27me3; H3K36me3; H3K4me1; H3K4me3; H3K9me3	5
rs6957979	7	36982483	7p14.2	1	ELMO1	10	DNase; H3K27ac; H3K27me3; H3K36me3; H3K36me3; H3K4me1; H3K4me1; H3K4me3; H3K9me3; H3K9me3	pancreas; endocrine; pancreas; pancreas; endocrine; pancreas; endocrine; pancreas; endocrine; pancreas	1/5; 1/2; 1/1; 1/1; 1/2; 1/1; 1/2; 1/1; 1/1; 1/1	H3K27ac; H3K36me3; H3K4me1; H3K9me3; DNase; H3K27me3; H3K4me3	7
chr7_47538546_C_T	7	47538546	7p12.3	1	TNS3	8	DNase; FAIRE; H3K27ac; H3K36me3; H3K4me1; H3K4me3; H3K9ac	pancreas; pancreas; endocrine; pancreas; pancreas; pancreas; endocrine	1/5; 1/2; 2/2; 1/1; 1/1; 1/1; 1/2	H3K27ac; H3K9ac; DNase; FAIRE; H3K36me3; H3K4me1; H3K4me3	7
chr7_587783_C_G	7	587783	7p22.3	2	PRKAR1B; AC147651.2	#N/A	#N/A	#N/A	#N/A	#N/A	#N/A
rs3801714	7	81830424	7q21.11	1	CACNA2D1	4	H3K27ac; H3K4me1; H3K9me3	endocrine; endocrine; pancreas	1/2; 2/2; 1/1	H3K27ac; H3K4me1; H3K9me3	3
rs12549518	8	128309591	8q24.21	2	CASC8; RP11-382A18.3	1	H3K9me3	endocrine	1/1	H3K9me3	1
rs6996866	8	128310155	8q24.21	1	CASC8	3	H3K36me3; H3K36me3; H3K9me3	pancreas; endocrine; endocrine	1/1; 1/2; 1/1	H3K36me3; H3K9me3	2
rs283727	8	128313360	8q24.21	1	CASC8	3	H3K27me3; H3K4me1; H3K9me3	pancreas; endocrine; endocrine	1/1; 1/2; 1/1	H3K4me1; H3K9me3; H3K27me3	3
rs283728	8	128313500	8q24.21	1	CASC8	2	H3K27me3; H3K9me3	pancreas; endocrine	1/1; 1/1	H3K9me3; H3K27me3	2
rs4871015	8	128314516	8q24.21	1	CASC8	3	H3K36me3; H3K36me3; H3K4me1	endocrine; pancreas; pancreas	1/2; 1/1; 1/1	H3K36me3; H3K4me1	2
rs283705	8	128317450	8q24.21	2	CASC8; -	5	DNase; H3K27me3; H3K9me3	body_pancreas; pancreas; pancreas	NA; 1/1; 1/1	DNase; NA; H3K27me3; H3K9me3	4
rs11781932	8	128330178	8q24.21	1	CASC8	#N/A	#N/A	#N/A	#N/A	#N/A	#N/A
rs7002712	8	128341612	8q24.21	2	CASC8; -	#N/A	#N/A	#N/A	#N/A	#N/A	#N/A
rs7838714	8	128343948	8q24.21	1	CASC8	2	H3K36me3; H3K9me3	pancreas; pancreas	1/1; 1/1	H3K36me3; H3K9me3	2
rs17465052	8	128354080	8q24.21	3	CASC8; RP11-382A18.2; -	2	H3K27me3; H3K4me1	pancreas; pancreas	1/1; 1/1	H3K27me3; H3K4me1	2
rs10098985	8	128355019	8q24.21	3	CASC8; RP11-382A18.2; -	2	FAIRE; H3K36me3	pancreas; endocrine	1/2; 1/2	H3K36me3; FAIRE	2
rs10097200	8	128363652	8q24.21	2	CASC8; RP11-382A18.2	2	H3K36me3; H3K9me3	pancreas; pancreas	1/1; 1/1	H3K36me3; H3K9me3	2
rs7002826	8	128364271	8q24.21	2	CASC8; RP11-382A18.2	5	H3K36me3; H3K36me3; H3K4me1; H3K9me3; H3K9me3	pancreas; endocrine; pancreas; endocrine; pancreas	1/1; 1/2; 1/1; 1/1; 1/1	H3K36me3; H3K9me3; H3K4me1	3
rs7007568	8	128364906	8q24.21	3	CASC8; RP11-382A18.2; -	6	H3K36me3; H3K36me3; H3K4me1; H3K9me3; H3K9me3	pancreas; endocrine; pancreas; endocrine; pancreas	1/1; 2/2; 1/1; 1/1; 1/1	H3K36me3; H3K9me3; H3K4me1	3
rs7842494	8	128366570	8q24.21	2	CASC8; RP11-382A18.2	5	FAIRE; H3K27me3; H3K36me3; H3K4me3; H3K9me3	pancreas; pancreas; pancreas; pancreas; pancreas	1/2; 1/1; 1/1; 1/1; 1/1	FAIRE; H3K27me3; H3K36me3; H3K4me3; H3K9me3	5
rs5022926	8	128366829	8q24.21	2	CASC8; RP11-382A18.2	5	FAIRE; H3K27me3; H3K36me3; H3K4me3; H3K9me3	pancreas; pancreas; pancreas; pancreas; pancreas	1/2; 1/1; 1/1; 1/1; 1/1	FAIRE; H3K27me3; H3K36me3; H3K4me3; H3K9me3	5
rs9297753	8	128375270	8q24.21	2	CASC8; RP11-382A18.2	3	H3K27me3; H3K4me3; H3K9me3	pancreas; pancreas; pancreas	1/1; 1/1; 1/1	H3K27me3; H3K4me3; H3K9me3	3
rs9283954	8	128375370	8q24.21	2	CASC8; RP11-382A18.2	4	FAIRE; H3K27me3; H3K4me3; H3K9me3	pancreas; pancreas; pancreas; pancreas	1/2; 1/1; 1/1; 1/1	FAIRE; H3K27me3; H3K4me3; H3K9me3	4
rs7831303	8	128376732	8q24.21	3	CASC8; RP11-382A18.2; -	#N/A	#N/A	#N/A	#N/A	#N/A	#N/A
rs7815100	8	128376801	8q24.21	3	CASC8; RP11-382A18.2; -	1	H3K4me1	endocrine	1/2	H3K4me1	1
rs6988647	8	128377656	8q24.21	3	CASC8; RP11-382A18.2; -	1	H3K9me3	endocrine	1/1	H3K9me3	1
rs9692890	8	128377774	8q24.21	3	CASC8; RP11-382A18.2; -	2	H3K27me3; H3K36me3	endocrine; pancreas	1/1; 1/1	H3K27me3; H3K36me3	2
rs9693143	8	128378025	8q24.21	3	CASC8; RP11-382A18.2; -	3	H3K27me3; H3K27me3; H3K36me3	endocrine; pancreas; pancreas	1/1; 1/1; 1/1	H3K27me3; H3K36me3	2
rs16902126	8	128382357	8q24.21	2	CASC8; RP11-382A18.2	#N/A	#N/A	#N/A	#N/A	#N/A	#N/A
rs7815245	8	128383597	8q24.21	3	CASC8; RP11-382A18.2; -	5	H3K27me3; H3K27me3; H3K36me3; H3K4me3; H3K9me3	pancreas; endocrine; pancreas; pancreas; pancreas	1/1; 1/1; 1/1; 1/1; 1/1	H3K27me3; H3K36me3; H3K4me3; H3K9me3	4
rs1562430	8	128387852	8q24.21	3	CASC8; RP11-382A18.2; -	7	H3K27me3; H3K27me3; H3K4me1; H3K4me1; H3K4me3; H3K9me3; H3K9me3	pancreas; endocrine; pancreas; endocrine; pancreas; endocrine; pancreas	1/1; 1/1; 1/1; 1/2; 1/1; 1/1; 1/1	H3K27me3; H3K4me1; H3K9me3; H3K4me3	4
rs7015780	8	128389507	8q24.21	2	CASC8; RP11-382A18.2	4	H3K27me3; H3K36me3; H3K4me1; H3K9me3	endocrine; endocrine; pancreas; pancreas	1/1; 1/2; 1/1; 1/1	H3K27me3; H3K36me3; H3K4me1; H3K9me3	4
rs2052701	8	133731794	8q24.22	1	TMEM71	2	H3K27me3; H3K27me3	pancreas; endocrine	1/1; 1/1	H3K27me3	1
rs180204	8	133881244	8q24.22	1	TG	3	H3K27me3; H3K27me3; H3K9me3	pancreas; endocrine; pancreas	1/1; 1/1; 1/1	H3K27me3; H3K9me3	2
rs2247583	8	14604752	8p22	1	SGCZ	1	H3K36me3	endocrine	1/2	H3K36me3	1
rs4733347	8	32376010	8p12	1	NRG1	1	H3K36me3	endocrine	1/2	H3K36me3	1
rs1108144	8	96404286	8q22.1	1	KB-1047C11.2	2	H3K36me3; H3K9me3	pancreas; pancreas	1/1; 1/1	H3K36me3; H3K9me3	2
rs11778211	8	96407360	8q22.1	1	KB-1047C11.2	1	H3K36me3	endocrine	1/2	H3K36me3	1

[truncated: 3 more sheets: Table S6 VEP_annotation, Table S6 regulomeDB, Table S6 Summary_functional_ana]
