# Supplementary material for: A multilayered post-GWAS assessment on genetic susceptibility to pancreatic cancer
Source: Genome Med. 2021 Feb 1;13:15. doi: 10.1186/s13073-020-00816-4 (PMC7849104; doi:10.1186/s13073-020-00816-4)
Supplement: Supplementary file 5 — Additional file 5: Table S7. Results from the gene enrichment analysis performed with FUMA in the 1D prioritized genes. [file 13073_2020_816_MOESM5_ESM.xlsx]

## Sheet: Table S7 Results from FUMA - Pa
Table S7. Results from the gene enrichment analysis performed with FUMA in the 1D prioritized genes
Category	GeneSet	N_genes	N_overlap	p	adjP	genes	link
GO_bp	GO_OLIGODENDROCYTE_DIFFERENTIATION	60	3	7.2412e+09	0.008655724039927966	DUSP10:EIF2B5:NRG1:NRG1-IT2	http://www.broadinstitute.org/gsea/msigdb/cards/GO_OLIGODENDROCYTE_DIFFERENTIATION
GO_bp	GO_POSITIVE_REGULATION_OF_MOLECULAR_FUNCTION	1786	13	1.35606e+11	0.010025767969078413	GAL:LRRK2:PRKCA:AGAP1:EIF2B5:DVL3:TERT:TRIM31:SMAP1:PRKAR1B:ELMO1:CACNA2D1:NRG1:NRG1-IT2	http://www.broadinstitute.org/gsea/msigdb/cards/GO_POSITIVE_REGULATION_OF_MOLECULAR_FUNCTION
GO_bp	GO_MUSCLE_TISSUE_DEVELOPMENT	274	5	2.15949e+11	0.011483165032285384	NEBL:CHRNA1:KEL:SGCZ:NRG1:NRG1-IT2	http://www.broadinstitute.org/gsea/msigdb/cards/GO_MUSCLE_TISSUE_DEVELOPMENT
GO_bp	GO_REGULATION_OF_CALCIUM_ION_DEPENDENT_EXOCYTOSIS	84	3	2.76094e+10	0.011483165032285384	LRRK2:RPH3A:RPH3AL	http://www.broadinstitute.org/gsea/msigdb/cards/GO_REGULATION_OF_CALCIUM_ION_DEPENDENT_EXOCYTOSIS
GO_bp	GO_RESPONSE_TO_DRUG	430	6	2.90567e+11	0.011483165032285384	PDZK1:GAL:RPH3AL:PTPRM:EIF2B5:DVL3	http://www.broadinstitute.org/gsea/msigdb/cards/GO_RESPONSE_TO_DRUG
GO_bp	GO_ENSHEATHMENT_OF_NEURONS	91	3	3.78323e+11	0.011483165032285384	EIF2B5:KEL:NRG1:NRG1-IT2	http://www.broadinstitute.org/gsea/msigdb/cards/GO_ENSHEATHMENT_OF_NEURONS
GO_bp	GO_HEART_DEVELOPMENT	466	6	4.83084e+11	0.011483165032285384	DHRS3:NEBL:BICC1:DVL3:SGCZ:NRG1:NRG1-IT2	http://www.broadinstitute.org/gsea/msigdb/cards/GO_HEART_DEVELOPMENT
GO_bp	GO_REGULATION_OF_PROTEIN_TARGETING_TO_MITOCHONDRION	98	3	5.05833e+10	0.011483165032285384	HHAT:LRRK2:NRG1:NRG1-IT2	http://www.broadinstitute.org/gsea/msigdb/cards/GO_REGULATION_OF_PROTEIN_TARGETING_TO_MITOCHONDRION
GO_bp	GO_REGULATION_OF_ANATOMICAL_STRUCTURE_SIZE	471	6	5.16612e+11	0.011483165032285384	LRRK2:AQP2:PTPRM:LRRC16A:KEL:NRG1:NRG1-IT2	http://www.broadinstitute.org/gsea/msigdb/cards/GO_REGULATION_OF_ANATOMICAL_STRUCTURE_SIZE
GO_bp	GO_REGULATION_OF_CELLULAR_LOCALIZATION	1273	10	5.37833e+11	0.011483165032285384	PDZK1:HHAT:GAL:LRRK2:RPH3A:RPH3AL:PRKCA:DVL3:TERT:NRG1:NRG1-IT2	http://www.broadinstitute.org/gsea/msigdb/cards/GO_REGULATION_OF_CELLULAR_LOCALIZATION
GO_bp	GO_ORGAN_MORPHOGENESIS	840	8	5.40845e+11	0.011483165032285384	DHRS3:LHX4:NR5A2:LRRK2:PCGF2:PTPRM:DVL3:NRG1:NRG1-IT2	http://www.broadinstitute.org/gsea/msigdb/cards/GO_ORGAN_MORPHOGENESIS
GO_bp	GO_NEGATIVE_REGULATION_OF_APOPTOTIC_SIGNALING_PATHWAY	199	4	5.69499e+10	0.011483165032285384	LRRK2:PCGF2:TERT:NRG1:NRG1-IT2	http://www.broadinstitute.org/gsea/msigdb/cards/GO_NEGATIVE_REGULATION_OF_APOPTOTIC_SIGNALING_PATHWAY
GO_bp	GO_CARDIAC_CHAMBER_MORPHOGENESIS	104	3	6.37948e+10	0.011791405742598562	DHRS3:DVL3:NRG1:NRG1-IT2	http://www.broadinstitute.org/gsea/msigdb/cards/GO_CARDIAC_CHAMBER_MORPHOGENESIS
GO_bp	GO_REGULATION_OF_GTPASE_ACTIVITY	672	7	6.9949e+10	0.012411757580589327	LRRK2:AGAP1:EIF2B5:DVL3:SMAP1:ELMO1:NRG1:NRG1-IT2	http://www.broadinstitute.org/gsea/msigdb/cards/GO_REGULATION_OF_GTPASE_ACTIVITY
GO_bp	GO_HOMEOSTATIC_PROCESS	1335	10	8.2241e+10	0.014031581286314819	NR5A2:LRRK2:AQP2:RPH3AL:CHRNA1:TERT:PRKAR1B:CACNA2D1:KEL:SGCZ	http://www.broadinstitute.org/gsea/msigdb/cards/GO_HOMEOSTATIC_PROCESS
GO_bp	GO_CIRCULATORY_SYSTEM_PROCESS	366	5	0.00010730442355801658	0.015475456013621377	PTPRM:CACNA2D1:KEL:SGCZ:NRG1:NRG1-IT2	http://www.broadinstitute.org/gsea/msigdb/cards/GO_CIRCULATORY_SYSTEM_PROCESS
GO_bp	GO_MUSCLE_CELL_DIFFERENTIATION	236	4	0.00012700709610578462	0.015475456013621377	NEBL:KEL:SGCZ:NRG1:NRG1-IT2	http://www.broadinstitute.org/gsea/msigdb/cards/GO_MUSCLE_CELL_DIFFERENTIATION
GO_bp	GO_REGULATION_OF_PROTEIN_LOCALIZATION	948	8	0.00013543653286459474	0.015475456013621377	PDZK1:HHAT:LRRK2:RPH3AL:PRKCA:DVL3:TERT:NRG1:NRG1-IT2	http://www.broadinstitute.org/gsea/msigdb/cards/GO_REGULATION_OF_PROTEIN_LOCALIZATION
GO_bp	GO_REGULATION_OF_MULTICELLULAR_ORGANISMAL_DEVELOPMENT	1667	11	0.00013634311218820545	0.015475456013621377	DUSP10:GAL:LRRK2:PRKCA:PTPRM:LRRN1:DVL3:SMAP1:KEL:NRG1:NRG1-IT2:TG	http://www.broadinstitute.org/gsea/msigdb/cards/GO_REGULATION_OF_MULTICELLULAR_ORGANISMAL_DEVELOPMENT
GO_bp	GO_MUSCLE_CELL_DEVELOPMENT	127	3	0.0001383870060489844	0.015475456013621377	NEBL:KEL:SGCZ	http://www.broadinstitute.org/gsea/msigdb/cards/GO_MUSCLE_CELL_DEVELOPMENT
GO_bp	GO_REGULATION_OF_CELLULAR_PROTEIN_LOCALIZATION	552	6	0.00013853232306676778	0.015475456013621377	PDZK1:HHAT:LRRK2:DVL3:TERT:NRG1:NRG1-IT2	http://www.broadinstitute.org/gsea/msigdb/cards/GO_REGULATION_OF_CELLULAR_PROTEIN_LOCALIZATION
GO_bp	GO_REGULATION_OF_REGULATED_SECRETORY_PATHWAY	128	3	0.00014263109736323683	0.015475456013621377	LRRK2:RPH3A:RPH3AL	http://www.broadinstitute.org/gsea/msigdb/cards/GO_REGULATION_OF_REGULATED_SECRETORY_PATHWAY
GO_bp	GO_REGULATION_OF_ESTABLISHMENT_OF_PROTEIN_LOCALIZATION_TO_MITOCHONDRION	128	3	0.00014263109736323683	0.015475456013621377	HHAT:LRRK2:NRG1:NRG1-IT2	http://www.broadinstitute.org/gsea/msigdb/cards/GO_REGULATION_OF_ESTABLISHMENT_OF_PROTEIN_LOCALIZATION_TO_MITOCHONDRION
GO_bp	GO_CELL_DEVELOPMENT	1425	10	0.00014605978876050592	0.015475456013621377	LHX4:NEBL:LRRK2:PTPRM:LRRN1:EIF2B5:DPY19L2P2:KEL:SGCZ:NRG1:NRG1-IT2	http://www.broadinstitute.org/gsea/msigdb/cards/GO_CELL_DEVELOPMENT
GO_bp	GO_REGULATION_OF_NERVOUS_SYSTEM_DEVELOPMENT	749	7	0.00014765916927295851	0.015475456013621377	DUSP10:LRRK2:LRRN1:DVL3:KEL:NRG1:NRG1-IT2:TG	http://www.broadinstitute.org/gsea/msigdb/cards/GO_REGULATION_OF_NERVOUS_SYSTEM_DEVELOPMENT
GO_bp	GO_NEGATIVE_REGULATION_OF_CELL_COMMUNICATION	1189	9	0.0001512031386257753	0.015475456013621377	DHRS3:DUSP10:BICC1:LRRK2:RPH3AL:PCGF2:DVL3:TERT:NRG1:NRG1-IT2	http://www.broadinstitute.org/gsea/msigdb/cards/GO_NEGATIVE_REGULATION_OF_CELL_COMMUNICATION
GO_bp	GO_POSITIVE_REGULATION_OF_TRANSMEMBRANE_TRANSPORT	131	3	0.00015592880794435245	0.015475456013621377	PDZK1:GAL:CACNA2D1	http://www.broadinstitute.org/gsea/msigdb/cards/GO_POSITIVE_REGULATION_OF_TRANSMEMBRANE_TRANSPORT
GO_bp	GO_GLIAL_CELL_DIFFERENTIATION	136	3	0.00018005084906693282	0.015475456013621377	DUSP10:EIF2B5:NRG1:NRG1-IT2	http://www.broadinstitute.org/gsea/msigdb/cards/GO_GLIAL_CELL_DIFFERENTIATION
GO_bp	GO_CARDIAC_MUSCLE_TISSUE_DEVELOPMENT	140	3	0.0002012020075789782	0.015475456013621377	NEBL:SGCZ:NRG1:NRG1-IT2	http://www.broadinstitute.org/gsea/msigdb/cards/GO_CARDIAC_MUSCLE_TISSUE_DEVELOPMENT
GO_bp	GO_CIRCULATORY_SYSTEM_DEVELOPMENT	787	7	0.00020663242912982672	0.015475456013621377	DHRS3:NEBL:BICC1:PRKCA:DVL3:SGCZ:NRG1:NRG1-IT2	http://www.broadinstitute.org/gsea/msigdb/cards/GO_CIRCULATORY_SYSTEM_DEVELOPMENT
GO_bp	GO_AGING	264	4	0.0002138137173123717	0.015475456013621377	LRRK2:EIF2B5:TERT:SEC63	http://www.broadinstitute.org/gsea/msigdb/cards/GO_AGING
GO_bp	GO_CARDIAC_CHAMBER_DEVELOPMENT	144	3	0.000224088749108721	0.015475456013621377	DHRS3:DVL3:NRG1:NRG1-IT2	http://www.broadinstitute.org/gsea/msigdb/cards/GO_CARDIAC_CHAMBER_DEVELOPMENT
GO_bp	GO_SYNAPSE_ORGANIZATION	144	3	0.000224088749108721	0.015475456013621377	LRRK2:CHRNA1:NRG1:NRG1-IT2	http://www.broadinstitute.org/gsea/msigdb/cards/GO_SYNAPSE_ORGANIZATION
GO_bp	GO_REGULATION_OF_ANATOMICAL_STRUCTURE_MORPHOGENESIS	1020	8	0.00023345003203854799	0.015475456013621377	GAL:LRRK2:PRKCA:PTPRM:DVL3:LRRC16A:KEL:NRG1:NRG1-IT2	http://www.broadinstitute.org/gsea/msigdb/cards/GO_REGULATION_OF_ANATOMICAL_STRUCTURE_MORPHOGENESIS
GO_bp	GO_POSITIVE_REGULATION_OF_CATALYTIC_ACTIVITY	1515	10	0.00024813508343789296	0.015475456013621377	LRRK2:PRKCA:AGAP1:EIF2B5:DVL3:TERT:SMAP1:PRKAR1B:ELMO1:NRG1:NRG1-IT2	http://www.broadinstitute.org/gsea/msigdb/cards/GO_POSITIVE_REGULATION_OF_CATALYTIC_ACTIVITY
GO_bp	GO_MUSCLE_STRUCTURE_DEVELOPMENT	431	5	0.0002594296493398029	0.015475456013621377	NEBL:CHRNA1:KEL:SGCZ:NRG1:NRG1-IT2	http://www.broadinstitute.org/gsea/msigdb/cards/GO_MUSCLE_STRUCTURE_DEVELOPMENT
GO_bp	GO_MOVEMENT_OF_CELL_OR_SUBCELLULAR_COMPONENT	1272	9	0.0002600778010173071	0.015475456013621377	LHX4:LRRK2:PTPRM:FERMT1:LRRC16A:ELMO1:TNS3:CACNA2D1:NRG1:NRG1-IT2	http://www.broadinstitute.org/gsea/msigdb/cards/GO_MOVEMENT_OF_CELL_OR_SUBCELLULAR_COMPONENT
GO_bp	GO_MUSCLE_ORGAN_DEVELOPMENT	276	4	0.0002624512011730465	0.015475456013621377	CHRNA1:KEL:SGCZ:NRG1:NRG1-IT2	http://www.broadinstitute.org/gsea/msigdb/cards/GO_MUSCLE_ORGAN_DEVELOPMENT
GO_bp	GO_REGULATION_OF_TRANSPORT	1799	11	0.00027559987039587215	0.015475456013621377	PDZK1:HHAT:GAL:LRRK2:RPH3A:RPH3AL:PRKCA:SMAP1:CACNA2D1:KEL:NRG1:NRG1-IT2	http://www.broadinstitute.org/gsea/msigdb/cards/GO_REGULATION_OF_TRANSPORT
GO_bp	GO_REGULATION_OF_PROTEIN_BINDING	168	3	0.00040252006121185217	0.016968806015941255	LRRK2:TERT:NRG1:NRG1-IT2	http://www.broadinstitute.org/gsea/msigdb/cards/GO_REGULATION_OF_PROTEIN_BINDING
GO_bp	GO_CHEMICAL_HOMEOSTASIS	872	7	0.0004103148556568622	0.016968806015941255	NR5A2:LRRK2:AQP2:RPH3AL:PRKAR1B:CACNA2D1:KEL	http://www.broadinstitute.org/gsea/msigdb/cards/GO_CHEMICAL_HOMEOSTASIS
GO_bp	GO_REGULATION_OF_PROTEIN_TARGETING	307	4	0.0004271066207395198	0.016968806015941255	PDZK1:HHAT:LRRK2:NRG1:NRG1-IT2	http://www.broadinstitute.org/gsea/msigdb/cards/GO_REGULATION_OF_PROTEIN_TARGETING
GO_bp	GO_NEGATIVE_REGULATION_OF_RESPONSE_TO_STIMULUS	1357	9	0.0004334761038231055	0.016968806015941255	DHRS3:DUSP10:BICC1:LRRK2:RPH3AL:PCGF2:DVL3:TERT:NRG1:NRG1-IT2	http://www.broadinstitute.org/gsea/msigdb/cards/GO_NEGATIVE_REGULATION_OF_RESPONSE_TO_STIMULUS
GO_bp	GO_LOCOMOTION	1111	8	0.0004357218179729871	0.016968806015941255	LHX4:LRRK2:PTPRM:FERMT1:LRRC16A:ELMO1:TNS3:NRG1:NRG1-IT2	http://www.broadinstitute.org/gsea/msigdb/cards/GO_LOCOMOTION
GO_bp	GO_STRIATED_MUSCLE_CELL_DIFFERENTIATION	172	3	0.0004399036726404969	0.016968806015941255	NEBL:KEL:NRG1:NRG1-IT2	http://www.broadinstitute.org/gsea/msigdb/cards/GO_STRIATED_MUSCLE_CELL_DIFFERENTIATION
GO_bp	GO_REGULATION_OF_CELL_SIZE	172	3	0.0004399036726404969	0.016968806015941255	AQP2:KEL:NRG1:NRG1-IT2	http://www.broadinstitute.org/gsea/msigdb/cards/GO_REGULATION_OF_CELL_SIZE
GO_bp	GO_SIGNAL_RELEASE	172	3	0.0004399036726404969	0.016968806015941255	GAL:RPH3A:RPH3AL	http://www.broadinstitute.org/gsea/msigdb/cards/GO_SIGNAL_RELEASE
GO_bp	GO_REGULATION_OF_WNT_SIGNALING_PATHWAY	310	4	0.0004464103602176939	0.017071347913152502	BICC1:LRRK2:DVL3:TERT	http://www.broadinstitute.org/gsea/msigdb/cards/GO_REGULATION_OF_WNT_SIGNALING_PATHWAY
GO_bp	GO_CELLULAR_HOMEOSTASIS	675	6	0.0004674980586586876	0.01744430091474183	LRRK2:AQP2:CHRNA1:CACNA2D1:KEL:SGCZ	http://www.broadinstitute.org/gsea/msigdb/cards/GO_CELLULAR_HOMEOSTASIS
GO_bp	GO_GLIOGENESIS	175	3	0.00046952132221281733	0.01744430091474183	DUSP10:EIF2B5:NRG1:NRG1-IT2	http://www.broadinstitute.org/gsea/msigdb/cards/GO_GLIOGENESIS
GO_bp	GO_RESPONSE_TO_OXYGEN_CONTAINING_COMPOUND	1380	9	0.0004942529669217411	0.017540049290118747	SETDB1:DUSP10:GAL:LRRK2:AQP2:PCGF2:EIF2B5:PRKAR1B:TG	http://www.broadinstitute.org/gsea/msigdb/cards/GO_RESPONSE_TO_OXYGEN_CONTAINING_COMPOUND
GO_bp	GO_POSITIVE_REGULATION_OF_HYDROLASE_ACTIVITY	904	7	0.0005203184930977855	0.017865550895280406	LRRK2:AGAP1:EIF2B5:DVL3:SMAP1:ELMO1:NRG1:NRG1-IT2	http://www.broadinstitute.org/gsea/msigdb/cards/GO_POSITIVE_REGULATION_OF_HYDROLASE_ACTIVITY
GO_bp	GO_REGULATION_OF_SECRETION	695	6	0.0005557813398441605	0.017865550895280406	GAL:LRRK2:RPH3A:RPH3AL:PRKCA:NRG1:NRG1-IT2	http://www.broadinstitute.org/gsea/msigdb/cards/GO_REGULATION_OF_SECRETION
GO_bp	GO_REGULATION_OF_EXOCYTOSIS	184	3	0.0005668944707432956	0.018091682533937115	LRRK2:RPH3A:RPH3AL	http://www.broadinstitute.org/gsea/msigdb/cards/GO_REGULATION_OF_EXOCYTOSIS
GO_bp	GO_REGULATION_OF_SYSTEM_PROCESS	507	5	0.0006117800683103634	0.018337592184022967	GAL:PRKCA:PTPRM:CACNA2D1:NRG1:NRG1-IT2	http://www.broadinstitute.org/gsea/msigdb/cards/GO_REGULATION_OF_SYSTEM_PROCESS
GO_bp	GO_REGULATION_OF_NEUROTRANSMITTER_LEVELS	188	3	0.0006144649464062034	0.018337592184022967	LRRK2:RPH3A:RPH3AL	http://www.broadinstitute.org/gsea/msigdb/cards/GO_REGULATION_OF_NEUROTRANSMITTER_LEVELS
GO_bp	GO_REGULATION_OF_CELLULAR_COMPONENT_SIZE	336	4	0.000642535785061611	0.01849500068263304	AQP2:LRRC16A:KEL:NRG1:NRG1-IT2	http://www.broadinstitute.org/gsea/msigdb/cards/GO_REGULATION_OF_CELLULAR_COMPONENT_SIZE
GO_bp	GO_REGULATION_OF_CELL_MORPHOGENESIS_INVOLVED_IN_DIFFERENTIATION	337	4	0.0006511844844535092	0.01849500068263304	LRRK2:LRRC16A:KEL:NRG1:NRG1-IT2	http://www.broadinstitute.org/gsea/msigdb/cards/GO_REGULATION_OF_CELL_MORPHOGENESIS_INVOLVED_IN_DIFFERENTIATION
GO_bp	GO_SMALL_GTPASE_MEDIATED_SIGNAL_TRANSDUCTION	350	4	0.0007717438811756238	0.0197887621785842	SETDB1:LRRK2:AGAP1:ELMO1	http://www.broadinstitute.org/gsea/msigdb/cards/GO_SMALL_GTPASE_MEDIATED_SIGNAL_TRANSDUCTION
GO_bp	GO_POSITIVE_REGULATION_OF_CELLULAR_PROTEIN_LOCALIZATION	360	4	0.0008752774715602308	0.020654818941536052	PDZK1:HHAT:TERT:NRG1:NRG1-IT2	http://www.broadinstitute.org/gsea/msigdb/cards/GO_POSITIVE_REGULATION_OF_CELLULAR_PROTEIN_LOCALIZATION
GO_bp	GO_REGULATION_OF_CATION_TRANSMEMBRANE_TRANSPORT	208	3	0.0008956192824866544	0.020654818941536052	GAL:CACNA2D1:KEL	http://www.broadinstitute.org/gsea/msigdb/cards/GO_REGULATION_OF_CATION_TRANSMEMBRANE_TRANSPORT
GO_bp	GO_REGULATION_OF_APOPTOTIC_SIGNALING_PATHWAY	362	4	0.0008971686184185574	0.020654818941536052	LRRK2:PCGF2:TERT:NRG1:NRG1-IT2	http://www.broadinstitute.org/gsea/msigdb/cards/GO_REGULATION_OF_APOPTOTIC_SIGNALING_PATHWAY
GO_bp	GO_SYSTEM_PROCESS	1777	10	0.0009421874125026808	0.020793748068964637	DHRS3:AQP2:PTPRM:SCTR:CHRNA1:PRKAR1B:CACNA2D1:KEL:SGCZ:NRG1:NRG1-IT2	http://www.broadinstitute.org/gsea/msigdb/cards/GO_SYSTEM_PROCESS
GO_bp	GO_HEART_MORPHOGENESIS	212	3	0.0009611368238511765	0.021030333972394576	DHRS3:DVL3:NRG1:NRG1-IT2	http://www.broadinstitute.org/gsea/msigdb/cards/GO_HEART_MORPHOGENESIS
GO_bp	GO_REGULATION_OF_MITOCHONDRION_ORGANIZATION	218	3	0.00106563794371499	0.02198683682939393	HHAT:LRRK2:NRG1:NRG1-IT2	http://www.broadinstitute.org/gsea/msigdb/cards/GO_REGULATION_OF_MITOCHONDRION_ORGANIZATION
GO_bp	GO_REGULATION_OF_INTRACELLULAR_PROTEIN_TRANSPORT	381	4	0.0011260442575960934	0.02229969788703692	PDZK1:HHAT:LRRK2:NRG1:NRG1-IT2	http://www.broadinstitute.org/gsea/msigdb/cards/GO_REGULATION_OF_INTRACELLULAR_PROTEIN_TRANSPORT
GO_bp	GO_INTRACELLULAR_SIGNAL_TRANSDUCTION	1568	9	0.0013104713834226507	0.023922843855402793	SETDB1:DUSP10:GAL:LRRK2:PRKCA:AGAP1:DVL3:ELMO1:NRG1:NRG1-IT2	http://www.broadinstitute.org/gsea/msigdb/cards/GO_INTRACELLULAR_SIGNAL_TRANSDUCTION
GO_bp	GO_NEURON_PROJECTION_MORPHOGENESIS	402	4	0.001426581732022219	0.02472356412207685	LHX4:LRRK2:PTPRM:LRRN1	http://www.broadinstitute.org/gsea/msigdb/cards/GO_NEURON_PROJECTION_MORPHOGENESIS
GO_bp	GO_REGULATION_OF_CANONICAL_WNT_SIGNALING_PATHWAY	236	3	0.001426788190994516	0.02472356412207685	BICC1:LRRK2:DVL3	http://www.broadinstitute.org/gsea/msigdb/cards/GO_REGULATION_OF_CANONICAL_WNT_SIGNALING_PATHWAY
GO_bp	GO_POSITIVE_REGULATION_OF_ION_TRANSPORT	236	3	0.001426788190994516	0.02472356412207685	PDZK1:GAL:CACNA2D1	http://www.broadinstitute.org/gsea/msigdb/cards/GO_POSITIVE_REGULATION_OF_ION_TRANSPORT
GO_bp	GO_CELL_MOTILITY	832	6	0.0015775226064610056	0.026158101380292665	LRRK2:FERMT1:LRRC16A:ELMO1:TNS3:NRG1:NRG1-IT2	http://www.broadinstitute.org/gsea/msigdb/cards/GO_CELL_MOTILITY
GO_bp	GO_REGULATION_OF_CELL_DEVELOPMENT	834	6	0.0015991878548551719	0.026158101380292665	DUSP10:GAL:LRRK2:LRRC16A:KEL:NRG1:NRG1-IT2	http://www.broadinstitute.org/gsea/msigdb/cards/GO_REGULATION_OF_CELL_DEVELOPMENT
GO_bp	GO_PEPTIDYL_AMINO_ACID_MODIFICATION	836	6	0.0016210850182535577	0.026158101380292665	SETDB1:LRRK2:PCGF2:PRKCA:DPY19L2P2:NRG1:NRG1-IT2	http://www.broadinstitute.org/gsea/msigdb/cards/GO_PEPTIDYL_AMINO_ACID_MODIFICATION
GO_bp	GO_SYNAPTIC_SIGNALING	423	4	0.001782596981352268	0.027267586928547107	LRRK2:RPH3A:RPH3AL:CHRNA1	http://www.broadinstitute.org/gsea/msigdb/cards/GO_SYNAPTIC_SIGNALING
GO_bp	GO_REGULATION_OF_TRANSMEMBRANE_TRANSPORT	425	4	0.001819608411328968	0.02773808561049932	PDZK1:GAL:CACNA2D1:KEL	http://www.broadinstitute.org/gsea/msigdb/cards/GO_REGULATION_OF_TRANSMEMBRANE_TRANSPORT
GO_bp	GO_RESPONSE_TO_NITROGEN_COMPOUND	858	6	0.0018777532862929308	0.028046173663284314	GAL:LRRK2:CHRNA1:EIF2B5:TERT:PRKAR1B	http://www.broadinstitute.org/gsea/msigdb/cards/GO_RESPONSE_TO_NITROGEN_COMPOUND
GO_bp	GO_POSITIVE_REGULATION_OF_INTRACELLULAR_PROTEIN_TRANSPORT	258	3	0.001974678528940418	0.028909815030956087	PDZK1:HHAT:NRG1:NRG1-IT2	http://www.broadinstitute.org/gsea/msigdb/cards/GO_POSITIVE_REGULATION_OF_INTRACELLULAR_PROTEIN_TRANSPORT
GO_bp	GO_CENTRAL_NERVOUS_SYSTEM_DEVELOPMENT	869	6	0.0020174125431804395	0.029438296189304044	LHX4:DUSP10:LRRK2:RPH3A:EIF2B5:NRG1:NRG1-IT2	http://www.broadinstitute.org/gsea/msigdb/cards/GO_CENTRAL_NERVOUS_SYSTEM_DEVELOPMENT
GO_bp	GO_NEGATIVE_REGULATION_OF_CELL_DEATH	871	6	0.0020436499273029114	0.02972338058201874	LHX4:LRRK2:PCGF2:PRKCA:TERT:NRG1:NRG1-IT2	http://www.broadinstitute.org/gsea/msigdb/cards/GO_NEGATIVE_REGULATION_OF_CELL_DEATH
GO_bp	GO_NEGATIVE_REGULATION_OF_LOCOMOTION	263	3	0.0021169384594950436	0.030292706472000042	PTPRM:TRIM31:NRG1:NRG1-IT2	http://www.broadinstitute.org/gsea/msigdb/cards/GO_NEGATIVE_REGULATION_OF_LOCOMOTION
GO_bp	GO_NEUROGENESIS	1401	8	0.0022067546072717732	0.03134668579901276	LHX4:DUSP10:LRRK2:PTPRM:LRRN1:EIF2B5:KEL:NRG1:NRG1-IT2	http://www.broadinstitute.org/gsea/msigdb/cards/GO_NEUROGENESIS
GO_bp	GO_POSTTRANSCRIPTIONAL_REGULATION_OF_GENE_EXPRESSION	447	4	0.0022649000301505225	0.031674533457590505	PARN:PRKCA:EIF2B5:TERT	http://www.broadinstitute.org/gsea/msigdb/cards/GO_POSTTRANSCRIPTIONAL_REGULATION_OF_GENE_EXPRESSION
GO_bp	GO_ACTIN_FILAMENT_BASED_PROCESS	448	4	0.0022868646473264654	0.031674533457590505	NEBL:LRRC16A:ELMO1:CACNA2D1	http://www.broadinstitute.org/gsea/msigdb/cards/GO_ACTIN_FILAMENT_BASED_PROCESS
GO_bp	GO_MEMBRANE_ORGANIZATION	896	6	0.002394517574184317	0.03218812108812615	RPH3A:RPH3AL:PRKCA:SEC63:ELMO1:SGCZ	http://www.broadinstitute.org/gsea/msigdb/cards/GO_MEMBRANE_ORGANIZATION
GO_bp	GO_CELLULAR_COMPONENT_MORPHOGENESIS	900	6	0.0024547295268531233	0.032527607931656745	LHX4:NEBL:LRRK2:PTPRM:LRRN1:NRG1:NRG1-IT2	http://www.broadinstitute.org/gsea/msigdb/cards/GO_CELLULAR_COMPONENT_MORPHOGENESIS
GO_bp	GO_REGULATION_OF_VESICLE_MEDIATED_TRANSPORT	460	4	0.0025627213361710793	0.03333792330573287	LRRK2:RPH3A:RPH3AL:SMAP1	http://www.broadinstitute.org/gsea/msigdb/cards/GO_REGULATION_OF_VESICLE_MEDIATED_TRANSPORT
GO_bp	GO_ACTIVATION_OF_PROTEIN_KINASE_ACTIVITY	279	3	0.0026196133523428804	0.033455306190716474	LRRK2:PRKAR1B:NRG1:NRG1-IT2	http://www.broadinstitute.org/gsea/msigdb/cards/GO_ACTIVATION_OF_PROTEIN_KINASE_ACTIVITY
GO_bp	GO_REGULATION_OF_BINDING	283	3	0.0027570272459219282	0.03422162045903865	LRRK2:TERT:NRG1:NRG1-IT2	http://www.broadinstitute.org/gsea/msigdb/cards/GO_REGULATION_OF_BINDING
GO_bp	GO_REGULATION_OF_PROTEIN_SERINE_THREONINE_KINASE_ACTIVITY	469	4	0.002784942512559277	0.03422162045903865	DUSP10:LRRK2:DVL3:PRKAR1B	http://www.broadinstitute.org/gsea/msigdb/cards/GO_REGULATION_OF_PROTEIN_SERINE_THREONINE_KINASE_ACTIVITY
GO_bp	GO_REGULATION_OF_MULTI_ORGANISM_PROCESS	470	4	0.0028104686132891937	0.03434501038168282	NR5A2:PRKCA:TRIM31:ELMO1	http://www.broadinstitute.org/gsea/msigdb/cards/GO_REGULATION_OF_MULTI_ORGANISM_PROCESS
GO_bp	GO_WOUND_HEALING	470	4	0.0028104686132891937	0.03434501038168282	PRKCA:LRRC16A:PRKAR1B:NRG1:NRG1-IT2	http://www.broadinstitute.org/gsea/msigdb/cards/GO_WOUND_HEALING
GO_bp	GO_ANATOMICAL_STRUCTURE_HOMEOSTASIS	285	3	0.0028275546916977385	0.0344588808032175	CHRNA1:TERT:SGCZ	http://www.broadinstitute.org/gsea/msigdb/cards/GO_ANATOMICAL_STRUCTURE_HOMEOSTASIS
GO_bp	GO_REGULATION_OF_HORMONE_LEVELS	476	4	0.0029672044912018402	0.03491384382751025	DHRS3:GAL:PRKCA:TG	http://www.broadinstitute.org/gsea/msigdb/cards/GO_REGULATION_OF_HORMONE_LEVELS
GO_bp	GO_POSITIVE_REGULATION_OF_TRANSPORT	934	6	0.003015076877142608	0.035383283140223834	PDZK1:HHAT:GAL:RPH3AL:CACNA2D1:NRG1:NRG1-IT2	http://www.broadinstitute.org/gsea/msigdb/cards/GO_POSITIVE_REGULATION_OF_TRANSPORT
GO_bp	GO_POSITIVE_REGULATION_OF_KINASE_ACTIVITY	481	4	0.0031025764830883472	0.03631406142211058	LRRK2:DVL3:PRKAR1B:NRG1:NRG1-IT2	http://www.broadinstitute.org/gsea/msigdb/cards/GO_POSITIVE_REGULATION_OF_KINASE_ACTIVITY
GO_bp	GO_UROGENITAL_SYSTEM_DEVELOPMENT	297	3	0.0032768699602770024	0.037368110909482735	LRRK2:AQP2:SEC63	http://www.broadinstitute.org/gsea/msigdb/cards/GO_UROGENITAL_SYSTEM_DEVELOPMENT
GO_bp	GO_REGULATION_OF_CELL_DIFFERENTIATION	1488	8	0.003299253831620079	0.03752689742837608	DUSP10:GAL:LRRK2:PRKCA:LRRC16A:SMAP1:KEL:NRG1:NRG1-IT2	http://www.broadinstitute.org/gsea/msigdb/cards/GO_REGULATION_OF_CELL_DIFFERENTIATION
GO_bp	GO_REGULATION_OF_CELL_PROLIFERATION	1492	8	0.0033582312312174342	0.037866399209056587	NR5A2:GAL:LRRK2:PRKCA:PTPRM:TERT:TNS3:NRG1:NRG1-IT2	http://www.broadinstitute.org/gsea/msigdb/cards/GO_REGULATION_OF_CELL_PROLIFERATION
GO_bp	GO_NEGATIVE_REGULATION_OF_CELL_DEVELOPMENT	302	3	0.0034776664597000705	0.038858761751207845	DUSP10:GAL:NRG1:NRG1-IT2	http://www.broadinstitute.org/gsea/msigdb/cards/GO_NEGATIVE_REGULATION_OF_CELL_DEVELOPMENT
GO_bp	GO_TISSUE_DEVELOPMENT	1508	8	0.003602543339029169	0.0395566392374589	NR5A2:NEBL:PTPRM:CHRNA1:DVL3:KEL:SGCZ:NRG1:NRG1-IT2	http://www.broadinstitute.org/gsea/msigdb/cards/GO_TISSUE_DEVELOPMENT
GO_bp	GO_REGULATION_OF_BODY_FLUID_LEVELS	506	4	0.003847258866428171	0.041714007332127725	AQP2:PRKCA:LRRC16A:PRKAR1B	http://www.broadinstitute.org/gsea/msigdb/cards/GO_REGULATION_OF_BODY_FLUID_LEVELS
GO_bp	GO_HEMOSTASIS	311	3	0.0038599355626229037	0.041714007332127725	PRKCA:LRRC16A:PRKAR1B	http://www.broadinstitute.org/gsea/msigdb/cards/GO_HEMOSTASIS
GO_bp	GO_POSITIVE_REGULATION_OF_ESTABLISHMENT_OF_PROTEIN_LOCALIZATION	512	4	0.004043528627017729	0.04260592159014405	PDZK1:HHAT:RPH3AL:NRG1:NRG1-IT2	http://www.broadinstitute.org/gsea/msigdb/cards/GO_POSITIVE_REGULATION_OF_ESTABLISHMENT_OF_PROTEIN_LOCALIZATION
GO_bp	GO_BEHAVIOR	515	4	0.004144309850115845	0.0433588643752686	GAL:LRRK2:PRKAR1B:NRG1:NRG1-IT2	http://www.broadinstitute.org/gsea/msigdb/cards/GO_BEHAVIOR
GO_bp	GO_REGULATION_OF_MAP_KINASE_ACTIVITY	318	3	0.004176272244741777	0.04348813069876649	DUSP10:LRRK2:DVL3	http://www.broadinstitute.org/gsea/msigdb/cards/GO_REGULATION_OF_MAP_KINASE_ACTIVITY
GO_bp	GO_REGULATION_OF_METAL_ION_TRANSPORT	325	3	0.004509716196311579	0.04505653388927515	GAL:CACNA2D1:KEL	http://www.broadinstitute.org/gsea/msigdb/cards/GO_REGULATION_OF_METAL_ION_TRANSPORT
GO_bp	GO_CELL_CELL_SIGNALING	766	5	0.004859144344454648	0.04699717223165093	GAL:LRRK2:RPH3A:RPH3AL:CHRNA1	http://www.broadinstitute.org/gsea/msigdb/cards/GO_CELL_CELL_SIGNALING
GO_bp	GO_NEGATIVE_REGULATION_OF_PHOSPHORUS_METABOLIC_PROCESS	541	4	0.005094489422934371	0.048392195032413	DUSP10:LRRK2:PRKCA:PRKAR1B	http://www.broadinstitute.org/gsea/msigdb/cards/GO_NEGATIVE_REGULATION_OF_PHOSPHORUS_METABOLIC_PROCESS
GO_bp	GO_COVALENT_CHROMATIN_MODIFICATION	337	3	0.005122340933341004	0.04839916574527793	SETDB1:PCGF2:PRKCA	http://www.broadinstitute.org/gsea/msigdb/cards/GO_COVALENT_CHROMATIN_MODIFICATION
GO_bp	GO_REGULATION_OF_KINASE_ACTIVITY	775	5	0.005138865434180772	0.04839916574527793	DUSP10:LRRK2:DVL3:PRKAR1B:NRG1:NRG1-IT2	http://www.broadinstitute.org/gsea/msigdb/cards/GO_REGULATION_OF_KINASE_ACTIVITY
GO_bp	GO_POSITIVE_REGULATION_OF_PHOSPHORUS_METABOLIC_PROCESS	1033	6	0.005214909254482167	0.04901130816288749	LRRK2:PRKCA:STAP2:DVL3:PRKAR1B:NRG1:NRG1-IT2	http://www.broadinstitute.org/gsea/msigdb/cards/GO_POSITIVE_REGULATION_OF_PHOSPHORUS_METABOLIC_PROCESS
GO_bp	GO_NEURON_PROJECTION_DEVELOPMENT	545	4	0.0052533087011586614	0.04926781690980935	LHX4:LRRK2:PTPRM:LRRN1	http://www.broadinstitute.org/gsea/msigdb/cards/GO_NEURON_PROJECTION_DEVELOPMENT
GWAScatalog	Uric acid levels	29	3	3.70018e+09	0.00022967272670402293	PDZK1:NR5A2:LRRC16A	www.ncbi.nlm.nih.gov/pubmed/29558500
GWAScatalog	Prostate cancer	381	7	1.15992e+10	0.0004358399148390125	FBRSL1:CASC17:THADA:TERT:TRIM31:TNS3:CASC8	www.ncbi.nlm.nih.gov/pubmed/29356057
GWAScatalog	Coronary artery calcification	53	3	4.39566e+09	0.0007965282093415788	PRKCA:SORCS2:NRG1:NRG1-IT2	www.ncbi.nlm.nih.gov/pubmed/22144573
GWAScatalog	Immature fraction of reticulocytes	118	4	4.58244e+09	0.0007965282093415788	THADA:EIF2B5:TNS3:KEL	www.ncbi.nlm.nih.gov/pubmed/27863252
GWAScatalog	Major depressive disorder	210	5	4.76963e+10	0.0007965282093415788	EIF2B5:DVL3:CACNA2D1:NRG1:NRG1-IT2:KB-1047C11.2	www.ncbi.nlm.nih.gov/pubmed/29187746
GWAScatalog	Pursuit maintenance gain	94	3	4.2967e+10	0.0031424446590745422	BICC1:FSD1:LRRC16A	www.ncbi.nlm.nih.gov/pubmed/29064472
GWAScatalog	Mean corpuscular hemoglobin	318	5	4.95502e+10	0.0031424446590745422	THADA:AGAP1:TERT:TRIM31:TRIM31-AS1	www.ncbi.nlm.nih.gov/pubmed/19862010
GWAScatalog	Platelet count	344	5	7.64307e+10	0.0031424446590745422	RPH3A:THADA:EIF2B5:TERT:LRRC16A	www.ncbi.nlm.nih.gov/pubmed/29066854
GWAScatalog	Lung adenocarcinoma	113	3	8.81e+09	0.0031424446590745422	NR5A2:TERT:NRG1:NRG1-IT2	www.ncbi.nlm.nih.gov/pubmed/20700438
GWAScatalog	Plateletcrit	219	4	8.94791e+10	0.0031424446590745422	THADA:EIF2B5:TERT:LRRC16A	www.ncbi.nlm.nih.gov/pubmed/27863252
GWAScatalog	Granulocyte count	124	3	0.0001262029916404106	0.00317029815293809	THADA:TERT:TNS3	www.ncbi.nlm.nih.gov/pubmed/27863252
GWAScatalog	Myeloid white cell count	124	3	0.0001262029916404106	0.00317029815293809	THADA:TERT:TNS3	www.ncbi.nlm.nih.gov/pubmed/27863252
GWAScatalog	Atrial fibrillation	238	4	0.00013210994663007762	0.00317029815293809	NEBL:FBRSL1:CASC17:CHRNA1	www.ncbi.nlm.nih.gov/pubmed/17903304
GWAScatalog	Sum neutrophil eosinophil counts	126	3	0.00013423510553282986	0.00317029815293809	THADA:TERT:TNS3	www.ncbi.nlm.nih.gov/pubmed/27863252
GWAScatalog	Pancreatic cancer	128	3	0.00014263109736323683	0.00317029815293809	NR5A2:TERT:TNS3	www.ncbi.nlm.nih.gov/pubmed/29422604
GWAScatalog	Sum basophil neutrophil counts	132	3	0.00016055397623364968	0.0033987693842137392	THADA:TERT:TNS3	www.ncbi.nlm.nih.gov/pubmed/27863252
GWAScatalog	Male-pattern baldness	253	4	0.00017556862478485688	0.003664995042383887	ZC3H11A:PARN:THADA:TNS3	www.ncbi.nlm.nih.gov/pubmed/29146897
GWAScatalog	Eosinophil percentage of granulocytes	138	3	0.00019041458436407	0.0037656989513052265	ANKRD33B:TRIM31-AS1:ELMO1	www.ncbi.nlm.nih.gov/pubmed/27863252
GWAScatalog	Daytime sleep phenotypes	259	4	0.0001957158278369625	0.0038202712888175928	LRRK2:SMAP1:B3GAT2:KB-1047C11.2	www.ncbi.nlm.nih.gov/pubmed/27126917
GWAScatalog	Eosinophil percentage of white cells	141	3	0.00020675778520716327	0.003984063476491877	ANKRD33B:TRIM31-AS1:ELMO1	www.ncbi.nlm.nih.gov/pubmed/27863252
GWAScatalog	Chronic inflammatory diseases (ankylosing spondylitis, Crohn's disease, psoriasis, primary sclerosing cholangitis, ulcerative colitis) (pleiotropy)	167	3	0.00039354124786064544	0.0064999175333467045	NR5A2:LRRK2:THADA	www.ncbi.nlm.nih.gov/pubmed/26974007
GWAScatalog	Neutrophil count	172	3	0.0004399036726404969	0.006746685918149662	THADA:TERT:TNS3	www.ncbi.nlm.nih.gov/pubmed/29066854
GWAScatalog	Obesity-related traits	756	6	0.000909782238942064	0.010523669250604651	BICC1:LRRK2:SORCS2:B3GAT2:CACNA2D1:SGCZ	www.ncbi.nlm.nih.gov/pubmed/22013104
GWAScatalog	Lung cancer	214	3	0.0009951293265601886	0.0110791065023701	TERT:LRRC16A:NRG1:NRG1-IT2	www.ncbi.nlm.nih.gov/pubmed/18385676
GWAScatalog	Menarche (age at onset)	217	3	0.0010476918287891058	0.011328638983237597	NR5A2:PARN:AGAP1	www.ncbi.nlm.nih.gov/pubmed/21102462
GWAScatalog	Red blood cell count	234	3	0.0013829665998825404	0.013410314836280374	FBRSL1:TERT:PRKAR1B	www.ncbi.nlm.nih.gov/pubmed/20139978
GWAScatalog	Heel bone mineral density	243	3	0.0015878025618681678	0.014915420315549101	HHAT:THADA:GMDS-AS1	www.ncbi.nlm.nih.gov/pubmed/28869591
GWAScatalog	General cognitive ability	256	3	0.0019196783942114954	0.01748652500909017	EIF2B5:TRIM31-AS1:SGCZ	www.ncbi.nlm.nih.gov/pubmed/25383866
GWAScatalog	Mean corpuscular volume	349	3	0.005788536543816516	0.041627609690699625	THADA:AGAP1:TERT	www.ncbi.nlm.nih.gov/pubmed/20139978
Chemical_and_Genetic_pertubation	GOZGIT_ESR1_TARGETS_DN	757	9	3.26283e+09	0.006640612762427258	DHRS3:ANKRD35:PDZK1:NR5A2:DUSP10:NEBL:NBEA:PRKCA:STAP2	http://www.broadinstitute.org/gsea/msigdb/cards/GOZGIT_ESR1_TARGETS_DN
Chemical_and_Genetic_pertubation	DAVICIONI_PAX_FOXO1_SIGNATURE_IN_ARMS_UP	59	3	6.76891e+09	0.006640612762427258	NEBL:PRKCA:TNS3	http://www.broadinstitute.org/gsea/msigdb/cards/DAVICIONI_PAX_FOXO1_SIGNATURE_IN_ARMS_UP
Chemical_and_Genetic_pertubation	ZHENG_BOUND_BY_FOXP3	489	7	7.28615e+09	0.006640612762427258	NR5A2:THADA:FERMT1:SUMF1:ELMO1:TMEM71:TG	http://www.broadinstitute.org/gsea/msigdb/cards/ZHENG_BOUND_BY_FOXP3
Chemical_and_Genetic_pertubation	KORKOLA_YOLK_SAC_TUMOR	61	3	7.73739e+08	0.006640612762427258	PDZK1:LRRN1:NRG1:NRG1-IT2	http://www.broadinstitute.org/gsea/msigdb/cards/KORKOLA_YOLK_SAC_TUMOR
Chemical_and_Genetic_pertubation	BENPORATH_NOS_TARGETS	178	4	3.35084e+10	0.016433493754622282	DHRS3:NEBL:LRRN1:CACNA2D1	http://www.broadinstitute.org/gsea/msigdb/cards/BENPORATH_NOS_TARGETS
Chemical_and_Genetic_pertubation	SHETH_LIVER_CANCER_VS_TXNIP_LOSS_PAM1	228	4	0.00010808967532195037	0.026894181047107765	NEBL:BICC1:RPH3A:PRKCA	http://www.broadinstitute.org/gsea/msigdb/cards/SHETH_LIVER_CANCER_VS_TXNIP_LOSS_PAM1
Chemical_and_Genetic_pertubation	KOYAMA_SEMA3B_TARGETS_DN	403	5	0.00018089591343253632	0.030090717745275143	DHRS3:TERT:ANKRD33B:TNS3:DPY19L2P2	http://www.broadinstitute.org/gsea/msigdb/cards/KOYAMA_SEMA3B_TARGETS_DN
Chemical_and_Genetic_pertubation	ONKEN_UVEAL_MELANOMA_UP	779	7	0.00019283302953569854	0.030090717745275143	SETDB1:ZC3H11A:PCGF2:PRKCA:PTPRM:AGAP1:SEC63	http://www.broadinstitute.org/gsea/msigdb/cards/ONKEN_UVEAL_MELANOMA_UP
Chemical_and_Genetic_pertubation	BOSCO_ALLERGEN_INDUCED_TH2_ASSOCIATED_MODULE	149	3	0.0002552632107043678	0.03339699917129094	DHRS3:LRRN1:TMEM71	http://www.broadinstitute.org/gsea/msigdb/cards/BOSCO_ALLERGEN_INDUCED_TH2_ASSOCIATED_MODULE
Chemical_and_Genetic_pertubation	GRYDER_PAX3FOXO1_TOP_ENHANCERS	432	5	0.0002626620965991423	0.03339699917129094	NDUFA12:PARN:ELMO1:TNS3:NRG1:NRG1-IT2	http://www.broadinstitute.org/gsea/msigdb/cards/GRYDER_PAX3FOXO1_TOP_ENHANCERS
Chemical_and_Genetic_pertubation	SABATES_COLORECTAL_ADENOMA_DN	288	4	0.00031907653386233016	0.03590049849790339	PDZK1:NR5A2:LRRK2:CHRNA1	http://www.broadinstitute.org/gsea/msigdb/cards/SABATES_COLORECTAL_ADENOMA_DN
Chemical_and_Genetic_pertubation	BENPORATH_OCT4_TARGETS	289	4	0.00032418160601077926	0.03590049849790339	DHRS3:NEBL:LRRN1:CACNA2D1	http://www.broadinstitute.org/gsea/msigdb/cards/BENPORATH_OCT4_TARGETS
Chemical_and_Genetic_pertubation	ONDER_CDH1_TARGETS_2_DN	463	5	0.0003796795990439087	0.037241144671935386	DUSP10:HS3ST2:STAP2:FERMT1:NRG1:NRG1-IT2	http://www.broadinstitute.org/gsea/msigdb/cards/ONDER_CDH1_TARGETS_2_DN
Chemical_and_Genetic_pertubation	FARMER_BREAST_CANCER_BASAL_VS_LULMINAL	328	4	0.0005764125845523813	0.0400284032537361	PDZK1:HHAT:GAL:NBEA	http://www.broadinstitute.org/gsea/msigdb/cards/FARMER_BREAST_CANCER_BASAL_VS_LULMINAL
Chemical_and_Genetic_pertubation	MULLIGHAN_NPM1_SIGNATURE_3_UP	337	4	0.0006511844844535092	0.0400284032537361	TRIM31:TNS3:CACNA2D1:DPY19L2P2	http://www.broadinstitute.org/gsea/msigdb/cards/MULLIGHAN_NPM1_SIGNATURE_3_UP
Chemical_and_Genetic_pertubation	KASLER_HDAC7_TARGETS_1_UP	194	3	0.0006910381296377885	0.0400284032537361	ZC3H11A:DUSP10:TG	http://www.broadinstitute.org/gsea/msigdb/cards/KASLER_HDAC7_TARGETS_1_UP
Chemical_and_Genetic_pertubation	BENPORATH_SOX2_TARGETS	733	6	0.0007599124401181851	0.0400284032537361	DHRS3:NEBL:AQP2:STAP2:LRRN1:CACNA2D1	http://www.broadinstitute.org/gsea/msigdb/cards/BENPORATH_SOX2_TARGETS
Chemical_and_Genetic_pertubation	MEISSNER_NPC_HCP_WITH_H3_UNMETHYLATED	534	5	0.0008010768289597542	0.0400284032537361	HHAT:GAL:FBRSL1:HS3ST2:PRKAR1B	http://www.broadinstitute.org/gsea/msigdb/cards/MEISSNER_NPC_HCP_WITH_H3_UNMETHYLATED
Chemical_and_Genetic_pertubation	GRYDER_PAX3FOXO1_ENHANCERS_IN_TADS	975	7	0.0008509310174805874	0.0400284032537361	NDUFA12:PARN:AGAP1:SUMF1:ELMO1:TNS3:NRG1:NRG1-IT2	http://www.broadinstitute.org/gsea/msigdb/cards/GRYDER_PAX3FOXO1_ENHANCERS_IN_TADS
Chemical_and_Genetic_pertubation	MIKKELSEN_MEF_ICP_WITH_H3K27ME3	206	3	0.000864071789627788	0.0400284032537361	NR5A2:AQP2:ELMO1	http://www.broadinstitute.org/gsea/msigdb/cards/MIKKELSEN_MEF_ICP_WITH_H3K27ME3
Chemical_and_Genetic_pertubation	YOSHIMURA_MAPK8_TARGETS_DN	366	4	0.0009421729279973259	0.0400284032537361	PTPRM:EIF2B5:TNS3:NRG1:NRG1-IT2	http://www.broadinstitute.org/gsea/msigdb/cards/YOSHIMURA_MAPK8_TARGETS_DN
Chemical_and_Genetic_pertubation	BHAT_ESR1_TARGETS_NOT_VIA_AKT1_UP	211	3	0.0009444511108513325	0.0400284032537361	DHRS3:PDZK1:LHX4	http://www.broadinstitute.org/gsea/msigdb/cards/BHAT_ESR1_TARGETS_NOT_VIA_AKT1_UP
Chemical_and_Genetic_pertubation	ZHOU_INFLAMMATORY_RESPONSE_LIVE_DN	378	4	0.0010873044088265944	0.04232893946878352	DDI2:THADA:AGAP1:NRG1:NRG1-IT2	http://www.broadinstitute.org/gsea/msigdb/cards/ZHOU_INFLAMMATORY_RESPONSE_LIVE_DN
Chemical_and_Genetic_pertubation	MIYAGAWA_TARGETS_OF_EWSR1_ETS_FUSIONS_DN	223	3	0.0011586212779327453	0.0437093060125617	FAM63A:SEC63:NRG1:NRG1-IT2	http://www.broadinstitute.org/gsea/msigdb/cards/MIYAGAWA_TARGETS_OF_EWSR1_ETS_FUSIONS_DN
Chemical_and_Genetic_pertubation	MONNIER_POSTRADIATION_TUMOR_ESCAPE_UP	393	4	0.0012913229862811513	0.045653867984703195	CISD3:PRKCA:ANKRD33B:TNS3	http://www.broadinstitute.org/gsea/msigdb/cards/MONNIER_POSTRADIATION_TUMOR_ESCAPE_UP
Chemical_and_Genetic_pertubation	KONDO_EZH2_TARGETS	240	3	0.0015173246804574374	0.048331150212082355	NEBL:PRKAR1B:ELMO1	http://www.broadinstitute.org/gsea/msigdb/cards/KONDO_EZH2_TARGETS
Chemical_and_Genetic_pertubation	MEISSNER_BRAIN_HCP_WITH_H3K4ME3_AND_H3K27ME3	1068	7	0.0015204672947581983	0.048331150212082355	DHRS3:DUSP10:HS3ST2:SORCS2:ANKRD33B:B3GAT2:TNS3	http://www.broadinstitute.org/gsea/msigdb/cards/MEISSNER_BRAIN_HCP_WITH_H3K4ME3_AND_H3K27ME3
Chemical_and_Genetic_pertubation	CHYLA_CBFA2T3_TARGETS_DN	242	3	0.001564061865822255	0.04926077417768626	GAL:AGAP1:KEL	http://www.broadinstitute.org/gsea/msigdb/cards/CHYLA_CBFA2T3_TARGETS_DN
Chemical_and_Genetic_pertubation	GOBERT_OLIGODENDROCYTE_DIFFERENTIATION_DN	1078	7	0.0016121930259128372	0.049705352232947544	FAM63A:DUSP10:PRKCA:PTPRM:PRKAR1B:CACNA2D1:TMEM71	http://www.broadinstitute.org/gsea/msigdb/cards/GOBERT_OLIGODENDROCYTE_DIFFERENTIATION_DN
GO_cc	GO_TRANSPORT_VESICLE_MEMBRANE	149	4	1.42595e+11	0.0027568403747781425	LRRK2:AQP2:RPH3A:RPH3AL	http://www.broadinstitute.org/gsea/msigdb/cards/GO_TRANSPORT_VESICLE_MEMBRANE
GO_cc	GO_CELL_PROJECTION_MEMBRANE	298	4	0.0003729630990457031	0.02075331129628768	DHRS3:PDZK1:FERMT1:NRG1:NRG1-IT2	http://www.broadinstitute.org/gsea/msigdb/cards/GO_CELL_PROJECTION_MEMBRANE
GO_cc	GO_PLASMA_MEMBRANE_REGION	928	7	0.0006176414363545031	0.021127363031226677	DHRS3:PDZK1:LRRK2:AQP2:CHRNA1:FERMT1:NRG1:NRG1-IT2	http://www.broadinstitute.org/gsea/msigdb/cards/GO_PLASMA_MEMBRANE_REGION
GO_cc	GO_TRANSPORT_VESICLE	336	4	0.000642535785061611	0.021127363031226677	LRRK2:AQP2:RPH3A:RPH3AL	http://www.broadinstitute.org/gsea/msigdb/cards/GO_TRANSPORT_VESICLE
GO_cc	GO_GOLGI_APPARATUS	1440	9	0.0006870309766403463	0.021127363031226677	DUSP10:GAL:LRRK2:AQP2:RPH3A:NBEA:HS3ST2:B3GAT2:TG	http://www.broadinstitute.org/gsea/msigdb/cards/GO_GOLGI_APPARATUS
GO_cc	GO_CELL_LEADING_EDGE	350	4	0.0007717438811756238	0.02238057255409309	PTPRM:FERMT1:LRRC16A:NRG1:NRG1-IT2	http://www.broadinstitute.org/gsea/msigdb/cards/GO_CELL_LEADING_EDGE
GO_cc	GO_MEMBRANE_REGION	1131	7	0.0021744959634749377	0.04887635396394485	DHRS3:PDZK1:LRRK2:AQP2:CHRNA1:FERMT1:NRG1:NRG1-IT2	http://www.broadinstitute.org/gsea/msigdb/cards/GO_MEMBRANE_REGION
Hallmark_gene_sets	HALLMARK_ESTROGEN_RESPONSE_EARLY	200	3	0.0007741397749263643	0.03870698874631821	DHRS3:PDZK1:FAM63A	http://www.broadinstitute.org/gsea/msigdb/cards/HALLMARK_ESTROGEN_RESPONSE_EARLY
Immunologic_signatures	GSE19888_ADENOSINE_A3R_INH_VS_TCELL_MEMBRANES_ACT_MAST_CELL_DN	197	6	1.69268e+09	0.0004568752917959307	ZC3H11A:HS3ST2:FSD1:SORCS2:ELMO1:TMEM71	http://www.broadinstitute.org/gsea/msigdb/cards/GSE19888_ADENOSINE_A3R_INH_VS_TCELL_MEMBRANES_ACT_MAST_CELL_DN
Immunologic_signatures	GSE23502_BM_VS_COLON_TUMOR_MYELOID_DERIVED_SUPPRESSOR_CELL_UP	200	6	1.87551e+09	0.0004568752917959307	HHAT:HS3ST2:PRKCA:SORCS2:ANKRD33B:TG	http://www.broadinstitute.org/gsea/msigdb/cards/GSE23502_BM_VS_COLON_TUMOR_MYELOID_DERIVED_SUPPRESSOR_CELL_UP
Immunologic_signatures	GSE24671_CTRL_VS_SENDAI_VIRUS_INFECTED_MOUSE_SPLENOCYTES_UP	158	5	9.18368e+08	0.0014914289519601261	DHRS3:NEBL:LRRK2:ANKRD33B:TNS3	http://www.broadinstitute.org/gsea/msigdb/cards/GSE24671_CTRL_VS_SENDAI_VIRUS_INFECTED_MOUSE_SPLENOCYTES_UP
Immunologic_signatures	GSE16450_CTRL_VS_IFNA_12H_STIM_IMMATURE_NEURON_CELL_LINE_UP	196	5	3.20795e+10	0.0034116252320840353	NBEA:PARN:PRKCA:THADA:LRRC16A	http://www.broadinstitute.org/gsea/msigdb/cards/GSE16450_CTRL_VS_IFNA_12H_STIM_IMMATURE_NEURON_CELL_LINE_UP
Immunologic_signatures	GSE21670_TGFB_VS_IL6_TREATED_STAT3_KO_CD4_TCELL_UP	199	5	3.50126e+10	0.0034116252320840353	DDI2:AQP2:RPH3AL:THADA:SCTR	http://www.broadinstitute.org/gsea/msigdb/cards/GSE21670_TGFB_VS_IL6_TREATED_STAT3_KO_CD4_TCELL_UP
Immunologic_signatures	GSE25677_MPL_VS_MPL_AND_R848_STIM_BCELL_DN	123	4	5.61439e+09	0.004558881165581261	DUSP10:LRRK2:LRRC16A:TNS3	http://www.broadinstitute.org/gsea/msigdb/cards/GSE25677_MPL_VS_MPL_AND_R848_STIM_BCELL_DN
Immunologic_signatures	GSE10856_CTRL_VS_TNFRSF6B_IN_MACROPHAGE_UP	187	4	4.23902e+10	0.01495389143514611	ZC3H11A:LRRK2:HS3ST2:SMAP1	http://www.broadinstitute.org/gsea/msigdb/cards/GSE10856_CTRL_VS_TNFRSF6B_IN_MACROPHAGE_UP
Immunologic_signatures	GSE18281_PERIMEDULLARY_CORTICAL_REGION_VS_WHOLE_MEDULLA_THYMUS_DN	190	4	4.5723e+10	0.01495389143514611	FAM63A:LRRK2:EIF2B5:CACNA2D1	http://www.broadinstitute.org/gsea/msigdb/cards/GSE18281_PERIMEDULLARY_CORTICAL_REGION_VS_WHOLE_MEDULLA_THYMUS_DN
Immunologic_signatures	GSE5542_UNTREATED_VS_IFNA_AND_IFNG_TREATED_EPITHELIAL_CELLS_6H_UP	190	4	4.5723e+10	0.01495389143514611	FAM63A:NBEA:LRRN1:LRRC16A	http://www.broadinstitute.org/gsea/msigdb/cards/GSE5542_UNTREATED_VS_IFNA_AND_IFNG_TREATED_EPITHELIAL_CELLS_6H_UP
Immunologic_signatures	GSE5542_UNTREATED_VS_IFNA_TREATED_EPITHELIAL_CELLS_6H_DN	193	4	4.92551e+11	0.01495389143514611	NBEA:SUMF1:LRRN1:LRRC16A	http://www.broadinstitute.org/gsea/msigdb/cards/GSE5542_UNTREATED_VS_IFNA_TREATED_EPITHELIAL_CELLS_6H_DN
Immunologic_signatures	GSE6681_DELETED_FOXP3_VS_WT_TREG_DN	198	4	5.56069e+11	0.01495389143514611	LRRN1:TERT:ANKRD33B:SEC63	http://www.broadinstitute.org/gsea/msigdb/cards/GSE6681_DELETED_FOXP3_VS_WT_TREG_DN
Immunologic_signatures	GSE42021_TCONV_PLN_VS_TREG_PRECURSORS_THYMUS_UP	199	4	5.69499e+10	0.01495389143514611	PARN:PRKCA:AGAP1:TG	http://www.broadinstitute.org/gsea/msigdb/cards/GSE42021_TCONV_PLN_VS_TREG_PRECURSORS_THYMUS_UP
Immunologic_signatures	GSE12392_WT_VS_IFNAR_KO_CD8A_NEG_SPLEEN_DC_UP	199	4	5.69499e+10	0.01495389143514611	FBRSL1:LRRC16A:ELMO1:TMEM71	http://www.broadinstitute.org/gsea/msigdb/cards/GSE12392_WT_VS_IFNAR_KO_CD8A_NEG_SPLEEN_DC_UP
Immunologic_signatures	GSE30971_WBP7_HET_VS_KO_MACROPHAGE_UP	200	4	5.83177e+11	0.01495389143514611	ZC3H11A:DUSP10:BICC1:TG	http://www.broadinstitute.org/gsea/msigdb/cards/GSE30971_WBP7_HET_VS_KO_MACROPHAGE_UP
Immunologic_signatures	GSE9037_WT_VS_IRAK4_KO_BMDM_UP	200	4	5.83177e+11	0.01495389143514611	NBEA:PRKCA:TERT:NRG1:NRG1-IT2	http://www.broadinstitute.org/gsea/msigdb/cards/GSE9037_WT_VS_IRAK4_KO_BMDM_UP
Immunologic_signatures	GSE18893_TCONV_VS_TREG_2H_CULTURE_UP	200	4	5.83177e+11	0.01495389143514611	DDI2:SETDB1:DUSP10:NBEA	http://www.broadinstitute.org/gsea/msigdb/cards/GSE18893_TCONV_VS_TREG_2H_CULTURE_UP
Immunologic_signatures	GSE21546_WT_VS_SAP1A_KO_AND_ELK1_KO_DP_THYMOCYTES_UP	200	4	5.83177e+11	0.01495389143514611	DDI2:FBRSL1:ANKRD33B:TMEM71	http://www.broadinstitute.org/gsea/msigdb/cards/GSE21546_WT_VS_SAP1A_KO_AND_ELK1_KO_DP_THYMOCYTES_UP
Immunologic_signatures	GSE27786_NKCELL_VS_NKTCELL_UP	200	4	5.83177e+11	0.01495389143514611	DHRS3:FAM63A:SUMF1:TNS3	http://www.broadinstitute.org/gsea/msigdb/cards/GSE27786_NKCELL_VS_NKTCELL_UP
Immunologic_signatures	GSE3203_INFLUENZA_INF_VS_IFNB_TREATED_LN_BCELL_DN	200	4	5.83177e+11	0.01495389143514611	DDI2:TERT:ANKRD33B:LRRC16A	http://www.broadinstitute.org/gsea/msigdb/cards/GSE3203_INFLUENZA_INF_VS_IFNB_TREATED_LN_BCELL_DN
Immunologic_signatures	GSE9946_IMMATURE_VS_LISTERIA_INF_MATURE_DC_UP	133	3	0.00016527751388668938	0.032235974217446554	LRRK2:NBEA:EIF2B5	http://www.broadinstitute.org/gsea/msigdb/cards/GSE9946_IMMATURE_VS_LISTERIA_INF_MATURE_DC_UP
Immunologic_signatures	GSE14415_NATURAL_TREG_VS_TCONV_UP	150	3	0.00026185322025911844	0.032235974217446554	DVL3:ANKRD33B:TMEM71	http://www.broadinstitute.org/gsea/msigdb/cards/GSE14415_NATURAL_TREG_VS_TCONV_UP
Immunologic_signatures	GSE5589_WT_VS_IL10_KO_LPS_STIM_MACROPHAGE_180MIN_UP	155	3	0.0002966509048530903	0.032235974217446554	ANKRD33B:ELMO1:KEL	http://www.broadinstitute.org/gsea/msigdb/cards/GSE5589_WT_VS_IL10_KO_LPS_STIM_MACROPHAGE_180MIN_UP
Immunologic_signatures	GSE40274_CTRL_VS_HELIOS_TRANSDUCED_ACTIVATED_CD4_TCELL_UP	161	3	0.0003426475198923241	0.032235974217446554	AGAP1:SORCS2:TMEM71	http://www.broadinstitute.org/gsea/msigdb/cards/GSE40274_CTRL_VS_HELIOS_TRANSDUCED_ACTIVATED_CD4_TCELL_UP
Immunologic_signatures	GSE25147_UNSTIM_VS_HELIOBACTER_PYLORI_LPS_STIM_MKN45_CELL_UP	165	3	0.0003760146224537919	0.032235974217446554	NEBL:RPH3AL:AGAP1	http://www.broadinstitute.org/gsea/msigdb/cards/GSE25147_UNSTIM_VS_HELIOBACTER_PYLORI_LPS_STIM_MKN45_CELL_UP
Immunologic_signatures	GSE26488_WT_VS_VP16_TRANSGENIC_HDAC7_KO_DOUBLE_POSITIVE_THYMOCYTE_DN	167	3	0.00039354124786064544	0.032235974217446554	NEBL:THADA:LRRC16A	http://www.broadinstitute.org/gsea/msigdb/cards/GSE26488_WT_VS_VP16_TRANSGENIC_HDAC7_KO_DOUBLE_POSITIVE_THYMOCYTE_DN
Immunologic_signatures	GSE4590_LARGE_PRE_BCELL_VS_VPREB_POS_LARGE_PRE_BCELL_UP	172	3	0.0004399036726404969	0.032235974217446554	NEBL:PRKCA:TMEM71	http://www.broadinstitute.org/gsea/msigdb/cards/GSE4590_LARGE_PRE_BCELL_VS_VPREB_POS_LARGE_PRE_BCELL_UP
Immunologic_signatures	GSE43863_NAIVE_VS_MEMORY_TH1_CD4_TCELL_D150_LCMV_DN	174	3	0.00045949556896349506	0.032235974217446554	ANKRD33B:CACNA2D1:NRG1:NRG1-IT2	http://www.broadinstitute.org/gsea/msigdb/cards/GSE43863_NAIVE_VS_MEMORY_TH1_CD4_TCELL_D150_LCMV_DN
Immunologic_signatures	GSE37301_PRO_BCELL_VS_RAG2_KO_NK_CELL_DN	179	3	0.0005111883679373095	0.032235974217446554	PCGF2:PRKCA:TERT	http://www.broadinstitute.org/gsea/msigdb/cards/GSE37301_PRO_BCELL_VS_RAG2_KO_NK_CELL_DN
Immunologic_signatures	GSE21927_EL4_VS_MCA203_TUMOR_MONOCYTES_UP	181	3	0.0005329795621837108	0.032235974217446554	PDZK1:FSD1:PRKAR1B	http://www.broadinstitute.org/gsea/msigdb/cards/GSE21927_EL4_VS_MCA203_TUMOR_MONOCYTES_UP
Immunologic_signatures	GSE1740_UNSTIM_VS_IFNA_STIMULATED_MCSF_IFNG_DERIVED_MACROPHAGE_UP	185	3	0.0005785324686833427	0.032235974217446554	PDZK1:HHAT:SGCZ	http://www.broadinstitute.org/gsea/msigdb/cards/GSE1740_UNSTIM_VS_IFNA_STIMULATED_MCSF_IFNG_DERIVED_MACROPHAGE_UP
Immunologic_signatures	GSE16385_IFNG_TNF_VS_UNSTIM_MACROPHAGE_ROSIGLITAZONE_TREATED_UP	186	3	0.000590339289099122	0.032235974217446554	SMAP1:TNS3:KEL	http://www.broadinstitute.org/gsea/msigdb/cards/GSE16385_IFNG_TNF_VS_UNSTIM_MACROPHAGE_ROSIGLITAZONE_TREATED_UP
Immunologic_signatures	GSE2706_R848_VS_R848_AND_LPS_8H_STIM_DC_UP	187	3	0.0006023163190305349	0.032235974217446554	CISD3:PRKCA:TNS3	http://www.broadinstitute.org/gsea/msigdb/cards/GSE2706_R848_VS_R848_AND_LPS_8H_STIM_DC_UP
Immunologic_signatures	GSE27291_0H_VS_6H_STIM_GAMMADELTA_TCELL_UP	191	3	0.000651954311193714	0.032235974217446554	PTPRM:STAP2:PRKAR1B	http://www.broadinstitute.org/gsea/msigdb/cards/GSE27291_0H_VS_6H_STIM_GAMMADELTA_TCELL_UP
Immunologic_signatures	GSE5542_UNTREATED_VS_IFNG_TREATED_EPITHELIAL_CELLS_6H_UP	191	3	0.000651954311193714	0.032235974217446554	LRRN1:LRRC16A:PRKAR1B	http://www.broadinstitute.org/gsea/msigdb/cards/GSE5542_UNTREATED_VS_IFNG_TREATED_EPITHELIAL_CELLS_6H_UP
Immunologic_signatures	GSE4984_LPS_VS_VEHICLE_CTRL_TREATED_DC_UP	192	3	0.0006648032316916013	0.032235974217446554	DHRS3:LRRN1:PRKAR1B	http://www.broadinstitute.org/gsea/msigdb/cards/GSE4984_LPS_VS_VEHICLE_CTRL_TREATED_DC_UP
Immunologic_signatures	GSE34156_UNTREATED_VS_24H_TLR1_TLR2_LIGAND_TREATED_MONOCYTE_DN	192	3	0.0006648032316916013	0.032235974217446554	FBRSL1:NBEA:PRKCA	http://www.broadinstitute.org/gsea/msigdb/cards/GSE34156_UNTREATED_VS_24H_TLR1_TLR2_LIGAND_TREATED_MONOCYTE_DN
Immunologic_signatures	GSE1460_NAIVE_CD4_TCELL_CORD_BLOOD_VS_THYMIC_STROMAL_CELL_UP	193	3	0.0006778307063773938	0.032235974217446554	FAM63A:THADA:TERT	http://www.broadinstitute.org/gsea/msigdb/cards/GSE1460_NAIVE_CD4_TCELL_CORD_BLOOD_VS_THYMIC_STROMAL_CELL_UP
Immunologic_signatures	GSE21927_SPLEEN_VS_C26GM_TUMOR_MONOCYTE_BALBC_DN	193	3	0.0006778307063773938	0.032235974217446554	DHRS3:SMAP1:TNS3	http://www.broadinstitute.org/gsea/msigdb/cards/GSE21927_SPLEEN_VS_C26GM_TUMOR_MONOCYTE_BALBC_DN
Immunologic_signatures	GSE24574_BCL6_HIGH_TFH_VS_TFH_CD4_TCELL_UP	193	3	0.0006778307063773938	0.032235974217446554	PARN:TRIM31:B3GAT2	http://www.broadinstitute.org/gsea/msigdb/cards/GSE24574_BCL6_HIGH_TFH_VS_TFH_CD4_TCELL_UP
Immunologic_signatures	GSE26928_NAIVE_VS_CENT_MEMORY_CD4_TCELL_UP	194	3	0.0006910381296377885	0.032235974217446554	SETDB1:NBEA:TMEM71	http://www.broadinstitute.org/gsea/msigdb/cards/GSE26928_NAIVE_VS_CENT_MEMORY_CD4_TCELL_UP
Immunologic_signatures	GSE2770_TGFB_AND_IL4_ACT_VS_ACT_CD4_TCELL_2H_UP	195	3	0.0007044268966334956	0.032235974217446554	PRKCA:AGAP1:SMAP1	http://www.broadinstitute.org/gsea/msigdb/cards/GSE2770_TGFB_AND_IL4_ACT_VS_ACT_CD4_TCELL_2H_UP
Immunologic_signatures	GSE37301_COMMON_LYMPHOID_PROGENITOR_VS_PRO_BCELL_UP	195	3	0.0007044268966334956	0.032235974217446554	AQP2:PCGF2:TG	http://www.broadinstitute.org/gsea/msigdb/cards/GSE37301_COMMON_LYMPHOID_PROGENITOR_VS_PRO_BCELL_UP
Immunologic_signatures	GSE2585_THYMIC_MACROPHAGE_VS_MTEC_UP	195	3	0.0007044268966334956	0.032235974217446554	DHRS3:DUSP10:AQP2	http://www.broadinstitute.org/gsea/msigdb/cards/GSE2585_THYMIC_MACROPHAGE_VS_MTEC_UP
Immunologic_signatures	GSE19512_NAUTRAL_VS_INDUCED_TREG_UP	195	3	0.0007044268966334956	0.032235974217446554	AQP2:TRIM31:B3GAT2	http://www.broadinstitute.org/gsea/msigdb/cards/GSE19512_NAUTRAL_VS_INDUCED_TREG_UP
Immunologic_signatures	GSE27786_CD4_TCELL_VS_ERYTHTROBLAST_DN	196	3	0.0007179984034148199	0.032235974217446554	FAM63A:LRRK2:AQP2	http://www.broadinstitute.org/gsea/msigdb/cards/GSE27786_CD4_TCELL_VS_ERYTHTROBLAST_DN
Immunologic_signatures	GSE21927_SPLEEN_VS_BONE_MARROW_MONOCYTE_BALBC_UP	196	3	0.0007179984034148199	0.032235974217446554	PDZK1:SETDB1:SMAP1	http://www.broadinstitute.org/gsea/msigdb/cards/GSE21927_SPLEEN_VS_BONE_MARROW_MONOCYTE_BALBC_UP
Immunologic_signatures	GSE1460_CD4_THYMOCYTE_VS_NAIVE_CD4_TCELL_CORD_BLOOD_DN	196	3	0.0007179984034148199	0.032235974217446554	FAM63A:NR5A2:PRKCA	http://www.broadinstitute.org/gsea/msigdb/cards/GSE1460_CD4_THYMOCYTE_VS_NAIVE_CD4_TCELL_CORD_BLOOD_DN
Immunologic_signatures	GSE16450_CTRL_VS_IFNA_12H_STIM_MATURE_NEURON_CELL_LINE_UP	196	3	0.0007179984034148199	0.032235974217446554	HHAT:PTPRM:SCTR	http://www.broadinstitute.org/gsea/msigdb/cards/GSE16450_CTRL_VS_IFNA_12H_STIM_MATURE_NEURON_CELL_LINE_UP
Immunologic_signatures	GSE2128_C57BL6_VS_NOD_CD4CD8_DP_THYMOCYTE_UP	196	3	0.0007179984034148199	0.032235974217446554	LHX4:ZC3H11A:PTPRM	http://www.broadinstitute.org/gsea/msigdb/cards/GSE2128_C57BL6_VS_NOD_CD4CD8_DP_THYMOCYTE_UP
Immunologic_signatures	GSE5542_UNTREATED_VS_IFNA_TREATED_EPITHELIAL_CELLS_24H_UP	197	3	0.0007317540466919422	0.032235974217446554	DUSP10:PTPRM:DVL3	http://www.broadinstitute.org/gsea/msigdb/cards/GSE5542_UNTREATED_VS_IFNA_TREATED_EPITHELIAL_CELLS_24H_UP
Immunologic_signatures	GSE26290_WT_VS_PDK1_KO_ANTI_CD3_AND_IL2_STIM_CD8_TCELL_DN	197	3	0.0007317540466919422	0.032235974217446554	FAM63A:PARN:DVL3	http://www.broadinstitute.org/gsea/msigdb/cards/GSE26290_WT_VS_PDK1_KO_ANTI_CD3_AND_IL2_STIM_CD8_TCELL_DN
Immunologic_signatures	GSE22886_IGA_VS_IGM_MEMORY_BCELL_DN	197	3	0.0007317540466919422	0.032235974217446554	RPH3A:CHRNA1:TNS3	http://www.broadinstitute.org/gsea/msigdb/cards/GSE22886_IGA_VS_IGM_MEMORY_BCELL_DN
Immunologic_signatures	GSE13411_PLASMA_CELL_VS_MEMORY_BCELL_UP	197	3	0.0007317540466919422	0.032235974217446554	TERT:LRRC16A:TG	http://www.broadinstitute.org/gsea/msigdb/cards/GSE13411_PLASMA_CELL_VS_MEMORY_BCELL_UP
Immunologic_signatures	GSE20715_WT_VS_TLR4_KO_LUNG_DN	197	3	0.0007317540466919422	0.032235974217446554	FAM63A:ZC3H11A:ANKRD33B	http://www.broadinstitute.org/gsea/msigdb/cards/GSE20715_WT_VS_TLR4_KO_LUNG_DN
Immunologic_signatures	GSE26023_PHD3_KO_VS_WT_NEUTROPHIL_HYPOXIA_DN	197	3	0.0007317540466919422	0.032235974217446554	DHRS3:CHRNA1:NRG1:NRG1-IT2	http://www.broadinstitute.org/gsea/msigdb/cards/GSE26023_PHD3_KO_VS_WT_NEUTROPHIL_HYPOXIA_DN
Immunologic_signatures	GSE22886_NEUTROPHIL_VS_MONOCYTE_UP	198	3	0.0007456952241047224	0.032235974217446554	NR5A2:GAL:AQP2	http://www.broadinstitute.org/gsea/msigdb/cards/GSE22886_NEUTROPHIL_VS_MONOCYTE_UP
Immunologic_signatures	GSE21033_CTRL_VS_POLYIC_STIM_DC_1H_DN	198	3	0.0007456952241047224	0.032235974217446554	DUSP10:FSD1:NRG1:NRG1-IT2	http://www.broadinstitute.org/gsea/msigdb/cards/GSE21033_CTRL_VS_POLYIC_STIM_DC_1H_DN
Immunologic_signatures	GSE3982_EOSINOPHIL_VS_MAST_CELL_DN	198	3	0.0007456952241047224	0.032235974217446554	DHRS3:PARN:EIF2B5	http://www.broadinstitute.org/gsea/msigdb/cards/GSE3982_EOSINOPHIL_VS_MAST_CELL_DN
Immunologic_signatures	GSE25123_CTRL_VS_IL4_STIM_MACROPHAGE_UP	198	3	0.0007456952241047224	0.032235974217446554	PRKCA:AGAP1:SORCS2	http://www.broadinstitute.org/gsea/msigdb/cards/GSE25123_CTRL_VS_IL4_STIM_MACROPHAGE_UP
Immunologic_signatures	GSE3982_EOSINOPHIL_VS_CENT_MEMORY_CD4_TCELL_DN	198	3	0.0007456952241047224	0.032235974217446554	DHRS3:EIF2B5:DPY19L2P2	http://www.broadinstitute.org/gsea/msigdb/cards/GSE3982_EOSINOPHIL_VS_CENT_MEMORY_CD4_TCELL_DN
Immunologic_signatures	GSE32986_UNSTIM_VS_CURDLAN_HIGHDOSE_STIM_DC_DN	198	3	0.0007456952241047224	0.032235974217446554	HHAT:AGAP1:SUMF1	http://www.broadinstitute.org/gsea/msigdb/cards/GSE32986_UNSTIM_VS_CURDLAN_HIGHDOSE_STIM_DC_DN
Immunologic_signatures	GSE17721_LPS_VS_GARDIQUIMOD_12H_BMDC_DN	198	3	0.0007456952241047224	0.032235974217446554	FAM63A:LRRC16A:SMAP1	http://www.broadinstitute.org/gsea/msigdb/cards/GSE17721_LPS_VS_GARDIQUIMOD_12H_BMDC_DN
Immunologic_signatures	GSE17301_IFNA2_VS_IFNA2_AND_ACD3_ACD28_STIM_CD8_TCELL_DN	198	3	0.0007456952241047224	0.032235974217446554	FAM63A:PRKCA:PTPRM	http://www.broadinstitute.org/gsea/msigdb/cards/GSE17301_IFNA2_VS_IFNA2_AND_ACD3_ACD28_STIM_CD8_TCELL_DN
Immunologic_signatures	GSE3982_MAST_CELL_VS_DC_UP	198	3	0.0007456952241047224	0.032235974217446554	DUSP10:NBEA:LRRC16A	http://www.broadinstitute.org/gsea/msigdb/cards/GSE3982_MAST_CELL_VS_DC_UP
Immunologic_signatures	GSE16385_UNTREATED_VS_12H_IL4_TREATED_MACROPHAGE_UP	199	3	0.0007598233338900941	0.032235974217446554	ANKRD35:PCGF2:PRKCA	http://www.broadinstitute.org/gsea/msigdb/cards/GSE16385_UNTREATED_VS_12H_IL4_TREATED_MACROPHAGE_UP
Immunologic_signatures	GSE22282_HYPOXIA_VS_NORMOXIA_MYELOID_DC_DN	199	3	0.0007598233338900941	0.032235974217446554	ANKRD35:SETDB1:TMEM71	http://www.broadinstitute.org/gsea/msigdb/cards/GSE22282_HYPOXIA_VS_NORMOXIA_MYELOID_DC_DN
Immunologic_signatures	GSE34156_TLR1_TLR2_LIGAND_VS_NOD2_AND_TLR1_TLR2_LIGAND_6H_TREATED_MONOCYTE_UP	199	3	0.0007598233338900941	0.032235974217446554	BICC1:STAP2:SEC63	http://www.broadinstitute.org/gsea/msigdb/cards/GSE34156_TLR1_TLR2_LIGAND_VS_NOD2_AND_TLR1_TLR2_LIGAND_6H_TREATED_MONOCYTE_UP
Immunologic_signatures	GSE13306_RA_VS_UNTREATED_TREG_UP	199	3	0.0007598233338900941	0.032235974217446554	DHRS3:DDI2:SORCS2	http://www.broadinstitute.org/gsea/msigdb/cards/GSE13306_RA_VS_UNTREATED_TREG_UP
Immunologic_signatures	GSE35543_IN_VIVO_NTREG_VS_CONVERTED_EX_ITREG_DN	199	3	0.0007598233338900941	0.032235974217446554	PTPRM:SCTR:B3GAT2	http://www.broadinstitute.org/gsea/msigdb/cards/GSE35543_IN_VIVO_NTREG_VS_CONVERTED_EX_ITREG_DN
Immunologic_signatures	GSE21546_UNSTIM_VS_ANTI_CD3_STIM_DP_THYMOCYTES_DN	199	3	0.0007598233338900941	0.032235974217446554	HS3ST2:CISD3:PRKCA	http://www.broadinstitute.org/gsea/msigdb/cards/GSE21546_UNSTIM_VS_ANTI_CD3_STIM_DP_THYMOCYTES_DN
Immunologic_signatures	GSE13306_TREG_VS_TCONV_DN	199	3	0.0007598233338900941	0.032235974217446554	NDUFA12:PARN:B3GAT2	http://www.broadinstitute.org/gsea/msigdb/cards/GSE13306_TREG_VS_TCONV_DN
Immunologic_signatures	GSE21774_CD56_BRIGHT_VS_DIM_CD62L_POSITIVE_NK_CELL_DN	199	3	0.0007598233338900941	0.032235974217446554	DUSP10:AGAP1:KEL	http://www.broadinstitute.org/gsea/msigdb/cards/GSE21774_CD56_BRIGHT_VS_DIM_CD62L_POSITIVE_NK_CELL_DN
Immunologic_signatures	GSE22443_NAIVE_VS_ACT_AND_IL12_TREATED_CD8_TCELL_DN	199	3	0.0007598233338900941	0.032235974217446554	NDUFA12:PTPRM:EIF2B5	http://www.broadinstitute.org/gsea/msigdb/cards/GSE22443_NAIVE_VS_ACT_AND_IL12_TREATED_CD8_TCELL_DN
Immunologic_signatures	GSE22229_RENAL_TRANSPLANT_IMMUNOSUPP_THERAPY_VS_HEALTHY_PBMC_DN	199	3	0.0007598233338900941	0.032235974217446554	LRRK2:SEC63:NRG1:NRG1-IT2	http://www.broadinstitute.org/gsea/msigdb/cards/GSE22229_RENAL_TRANSPLANT_IMMUNOSUPP_THERAPY_VS_HEALTHY_PBMC_DN
Immunologic_signatures	GSE45365_NK_CELL_VS_CD8A_DC_DN	199	3	0.0007598233338900941	0.032235974217446554	HS3ST2:RPH3AL:AGAP1	http://www.broadinstitute.org/gsea/msigdb/cards/GSE45365_NK_CELL_VS_CD8A_DC_DN
Immunologic_signatures	GSE2770_IL12_VS_TGFB_AND_IL12_TREATED_ACT_CD4_TCELL_48H_UP	199	3	0.0007598233338900941	0.032235974217446554	LRRC16A:SMAP1:TG	http://www.broadinstitute.org/gsea/msigdb/cards/GSE2770_IL12_VS_TGFB_AND_IL12_TREATED_ACT_CD4_TCELL_48H_UP
Immunologic_signatures	GSE21670_STAT3_KO_VS_WT_CD4_TCELL_IL6_TREATED_DN	199	3	0.0007598233338900941	0.032235974217446554	NBEA:PRKCA:ANKRD33B	http://www.broadinstitute.org/gsea/msigdb/cards/GSE21670_STAT3_KO_VS_WT_CD4_TCELL_IL6_TREATED_DN
Immunologic_signatures	GSE3982_MAST_CELL_VS_EFF_MEMORY_CD4_TCELL_UP	199	3	0.0007598233338900941	0.032235974217446554	DUSP10:NBEA:TNS3	http://www.broadinstitute.org/gsea/msigdb/cards/GSE3982_MAST_CELL_VS_EFF_MEMORY_CD4_TCELL_UP
Immunologic_signatures	GSE29618_PRE_VS_DAY7_POST_TIV_FLU_VACCINE_PDC_UP	199	3	0.0007598233338900941	0.032235974217446554	BICC1:FERMT1:EIF2B5	http://www.broadinstitute.org/gsea/msigdb/cards/GSE29618_PRE_VS_DAY7_POST_TIV_FLU_VACCINE_PDC_UP
Immunologic_signatures	GSE28237_FOLLICULAR_VS_LATE_GC_BCELL_UP	199	3	0.0007598233338900941	0.032235974217446554	THADA:LRRC16A:CACNA2D1	http://www.broadinstitute.org/gsea/msigdb/cards/GSE28237_FOLLICULAR_VS_LATE_GC_BCELL_UP
Immunologic_signatures	GSE2770_UNTREATED_VS_ACT_CD4_TCELL_6H_UP	199	3	0.0007598233338900941	0.032235974217446554	DHRS3:PCGF2:TG	http://www.broadinstitute.org/gsea/msigdb/cards/GSE2770_UNTREATED_VS_ACT_CD4_TCELL_6H_UP
Immunologic_signatures	GSE27786_CD8_TCELL_VS_NEUTROPHIL_DN	199	3	0.0007598233338900941	0.032235974217446554	DHRS3:FAM63A:CHRNA1	http://www.broadinstitute.org/gsea/msigdb/cards/GSE27786_CD8_TCELL_VS_NEUTROPHIL_DN
Immunologic_signatures	GSE42724_B1_BCELL_VS_PLASMABLAST_UP	199	3	0.0007598233338900941	0.032235974217446554	HS3ST2:PRKCA:AGAP1	http://www.broadinstitute.org/gsea/msigdb/cards/GSE42724_B1_BCELL_VS_PLASMABLAST_UP
Immunologic_signatures	GSE19198_1H_VS_24H_IL21_TREATED_TCELL_UP	199	3	0.0007598233338900941	0.032235974217446554	PTPRM:LRRN1:TMEM71	http://www.broadinstitute.org/gsea/msigdb/cards/GSE19198_1H_VS_24H_IL21_TREATED_TCELL_UP
Immunologic_signatures	GSE20715_0H_VS_6H_OZONE_TLR4_KO_LUNG_UP	199	3	0.0007598233338900941	0.032235974217446554	GAL:PRKCA:TMEM71	http://www.broadinstitute.org/gsea/msigdb/cards/GSE20715_0H_VS_6H_OZONE_TLR4_KO_LUNG_UP
Immunologic_signatures	GSE24634_IL4_VS_CTRL_TREATED_NAIVE_CD4_TCELL_DAY10_DN	199	3	0.0007598233338900941	0.032235974217446554	DHRS3:STAP2:TNS3	http://www.broadinstitute.org/gsea/msigdb/cards/GSE24634_IL4_VS_CTRL_TREATED_NAIVE_CD4_TCELL_DAY10_DN
Immunologic_signatures	GSE40443_INDUCED_VS_TOTAL_TREG_DN	200	3	0.0007741397749263643	0.032235974217446554	CISD3:CACNA2D1:TMEM71	http://www.broadinstitute.org/gsea/msigdb/cards/GSE40443_INDUCED_VS_TOTAL_TREG_DN
Immunologic_signatures	GSE40274_LEF1_VS_FOXP3_AND_LEF1_TRANSDUCED_ACTIVATED_CD4_TCELL_DN	200	3	0.0007741397749263643	0.032235974217446554	DUSP10:RPH3AL:TMEM71	http://www.broadinstitute.org/gsea/msigdb/cards/GSE40274_LEF1_VS_FOXP3_AND_LEF1_TRANSDUCED_ACTIVATED_CD4_TCELL_DN
Immunologic_signatures	GSE20715_WT_VS_TLR4_KO_6H_OZONE_LUNG_UP	200	3	0.0007741397749263643	0.032235974217446554	LRRK2:PRKCA:PRKAR1B	http://www.broadinstitute.org/gsea/msigdb/cards/GSE20715_WT_VS_TLR4_KO_6H_OZONE_LUNG_UP
Immunologic_signatures	GSE41978_WT_VS_ID2_KO_KLRG1_LOW_EFFECTOR_CD8_TCELL_DN	200	3	0.0007741397749263643	0.032235974217446554	DHRS3:SORCS2:ELMO1	http://www.broadinstitute.org/gsea/msigdb/cards/GSE41978_WT_VS_ID2_KO_KLRG1_LOW_EFFECTOR_CD8_TCELL_DN
Immunologic_signatures	GSE33162_UNTREATED_VS_4H_LPS_STIM_HDAC3_HET_MACROPHAGE_UP	200	3	0.0007741397749263643	0.032235974217446554	PDZK1:DUSP10:SORCS2	http://www.broadinstitute.org/gsea/msigdb/cards/GSE33162_UNTREATED_VS_4H_LPS_STIM_HDAC3_HET_MACROPHAGE_UP
Immunologic_signatures	GSE339_CD4POS_VS_CD8POS_DC_IN_CULTURE_UP	200	3	0.0007741397749263643	0.032235974217446554	DHRS3:NDUFA12:CHRNA1	http://www.broadinstitute.org/gsea/msigdb/cards/GSE339_CD4POS_VS_CD8POS_DC_IN_CULTURE_UP
Immunologic_signatures	GSE360_CTRL_VS_L_MAJOR_MAC_UP	200	3	0.0007741397749263643	0.032235974217446554	RPH3A:EIF2B5:KEL	http://www.broadinstitute.org/gsea/msigdb/cards/GSE360_CTRL_VS_L_MAJOR_MAC_UP
Immunologic_signatures	GSE13306_TREG_VS_TCONV_LAMINA_PROPRIA_UP	200	3	0.0007741397749263643	0.032235974217446554	DHRS3:SORCS2:PRKAR1B	http://www.broadinstitute.org/gsea/msigdb/cards/GSE13306_TREG_VS_TCONV_LAMINA_PROPRIA_UP
Immunologic_signatures	GSE7460_CTRL_VS_TGFB_TREATED_ACT_FOXP3_HET_TCONV_DN	200	3	0.0007741397749263643	0.032235974217446554	DHRS3:PRKCA:STAP2	http://www.broadinstitute.org/gsea/msigdb/cards/GSE7460_CTRL_VS_TGFB_TREATED_ACT_FOXP3_HET_TCONV_DN
Immunologic_signatures	GSE26890_CXCR1_NEG_VS_POS_EFFECTOR_CD8_TCELL_DN	200	3	0.0007741397749263643	0.032235974217446554	DHRS3:RPH3AL:CISD3	http://www.broadinstitute.org/gsea/msigdb/cards/GSE26890_CXCR1_NEG_VS_POS_EFFECTOR_CD8_TCELL_DN
Immunologic_signatures	GSE24142_ADULT_VS_FETAL_DN2_THYMOCYTE_UP	200	3	0.0007741397749263643	0.032235974217446554	DHRS3:PARN:TMEM71	http://www.broadinstitute.org/gsea/msigdb/cards/GSE24142_ADULT_VS_FETAL_DN2_THYMOCYTE_UP
Immunologic_signatures	GSE7764_IL15_TREATED_VS_CTRL_NK_CELL_24H_DN	200	3	0.0007741397749263643	0.032235974217446554	DHRS3:PRKCA:TMEM71	http://www.broadinstitute.org/gsea/msigdb/cards/GSE7764_IL15_TREATED_VS_CTRL_NK_CELL_24H_DN
Immunologic_signatures	GSE15324_NAIVE_VS_ACTIVATED_ELF4_KO_CD8_TCELL_DN	200	3	0.0007741397749263643	0.032235974217446554	HHAT:EIF2B5:ANKRD33B	http://www.broadinstitute.org/gsea/msigdb/cards/GSE15324_NAIVE_VS_ACTIVATED_ELF4_KO_CD8_TCELL_DN
Immunologic_signatures	GSE2770_IL12_VS_TGFB_AND_IL12_TREATED_ACT_CD4_TCELL_48H_DN	200	3	0.0007741397749263643	0.032235974217446554	DHRS3:DUSP10:RPH3AL	http://www.broadinstitute.org/gsea/msigdb/cards/GSE2770_IL12_VS_TGFB_AND_IL12_TREATED_ACT_CD4_TCELL_48H_DN
Immunologic_signatures	GSE15750_WT_VS_TRAF6KO_DAY6_EFF_CD8_TCELL_UP	200	3	0.0007741397749263643	0.032235974217446554	HHAT:THADA:TNS3	http://www.broadinstitute.org/gsea/msigdb/cards/GSE15750_WT_VS_TRAF6KO_DAY6_EFF_CD8_TCELL_UP
Immunologic_signatures	GSE17580_UNINFECTED_VS_S_MANSONI_INF_TEFF_UP	200	3	0.0007741397749263643	0.032235974217446554	SETDB1:LRRK2:SORCS2	http://www.broadinstitute.org/gsea/msigdb/cards/GSE17580_UNINFECTED_VS_S_MANSONI_INF_TEFF_UP
Immunologic_signatures	GSE17186_CD21LOW_VS_CD21HIGH_TRANSITIONAL_BCELL_UP	200	3	0.0007741397749263643	0.032235974217446554	DHRS3:LRRC16A:ELMO1	http://www.broadinstitute.org/gsea/msigdb/cards/GSE17186_CD21LOW_VS_CD21HIGH_TRANSITIONAL_BCELL_UP
Immunologic_signatures	GSE17721_POLYIC_VS_GARDIQUIMOD_0.5H_BMDC_UP	200	3	0.0007741397749263643	0.032235974217446554	NBEA:LRRN1:KEL	http://www.broadinstitute.org/gsea/msigdb/cards/GSE17721_POLYIC_VS_GARDIQUIMOD_0.5H_BMDC_UP
Immunologic_signatures	GSE16385_ROSIGLITAZONE_IFNG_TNF_VS_IL4_STIM_MACROPHAGE_UP	200	3	0.0007741397749263643	0.032235974217446554	LRRN1:B3GAT2:SEC63	http://www.broadinstitute.org/gsea/msigdb/cards/GSE16385_ROSIGLITAZONE_IFNG_TNF_VS_IL4_STIM_MACROPHAGE_UP
Immunologic_signatures	GSE5503_LIVER_DC_VS_SPLEEN_DC_ACTIVATED_ALLOGENIC_TCELL_DN	200	3	0.0007741397749263643	0.032235974217446554	DHRS3:FBRSL1:SEC63	http://www.broadinstitute.org/gsea/msigdb/cards/GSE5503_LIVER_DC_VS_SPLEEN_DC_ACTIVATED_ALLOGENIC_TCELL_DN
Immunologic_signatures	GSE7831_CPG_VS_INFLUENZA_STIM_PDC_4H_UP	200	3	0.0007741397749263643	0.032235974217446554	PARN:CISD3:SEC63	http://www.broadinstitute.org/gsea/msigdb/cards/GSE7831_CPG_VS_INFLUENZA_STIM_PDC_4H_UP
Immunologic_signatures	GSE16385_IFNG_TNF_VS_IL4_STIM_MACROPHAGE_UP	200	3	0.0007741397749263643	0.032235974217446554	SUMF1:LRRC16A:TNS3	http://www.broadinstitute.org/gsea/msigdb/cards/GSE16385_IFNG_TNF_VS_IL4_STIM_MACROPHAGE_UP
Immunologic_signatures	GSE5589_LPS_VS_LPS_AND_IL10_STIM_MACROPHAGE_45MIN_UP	200	3	0.0007741397749263643	0.032235974217446554	HHAT:CACNA2D1:TMEM71	http://www.broadinstitute.org/gsea/msigdb/cards/GSE5589_LPS_VS_LPS_AND_IL10_STIM_MACROPHAGE_45MIN_UP
Immunologic_signatures	GSE5099_UNSTIM_VS_MCSF_TREATED_MONOCYTE_DAY3_DN	200	3	0.0007741397749263643	0.032235974217446554	FAM63A:PARN:TNS3	http://www.broadinstitute.org/gsea/msigdb/cards/GSE5099_UNSTIM_VS_MCSF_TREATED_MONOCYTE_DAY3_DN
Immunologic_signatures	GSE14308_TH2_VS_NAIVE_CD4_TCELL_UP	200	3	0.0007741397749263643	0.032235974217446554	NBEA:CISD3:SUMF1	http://www.broadinstitute.org/gsea/msigdb/cards/GSE14308_TH2_VS_NAIVE_CD4_TCELL_UP
Immunologic_signatures	GSE20366_TREG_VS_NAIVE_CD4_TCELL_DEC205_CONVERSION_DN	200	3	0.0007741397749263643	0.032235974217446554	ANKRD35:PDZK1:SMAP1	http://www.broadinstitute.org/gsea/msigdb/cards/GSE20366_TREG_VS_NAIVE_CD4_TCELL_DEC205_CONVERSION_DN
Immunologic_signatures	GSE20366_TREG_VS_NAIVE_CD4_TCELL_DN	200	3	0.0007741397749263643	0.032235974217446554	ANKRD35:THADA:SMAP1	http://www.broadinstitute.org/gsea/msigdb/cards/GSE20366_TREG_VS_NAIVE_CD4_TCELL_DN
Immunologic_signatures	GSE3039_NKT_CELL_VS_B2_BCELL_UP	200	3	0.0007741397749263643	0.032235974217446554	PARN:PTPRM:AGAP1	http://www.broadinstitute.org/gsea/msigdb/cards/GSE3039_NKT_CELL_VS_B2_BCELL_UP
Immunologic_signatures	GSE2770_UNTREATED_VS_TGFB_AND_IL12_TREATED_ACT_CD4_TCELL_6H_DN	200	3	0.0007741397749263643	0.032235974217446554	NBEA:HS3ST2:LRRC16A	http://www.broadinstitute.org/gsea/msigdb/cards/GSE2770_UNTREATED_VS_TGFB_AND_IL12_TREATED_ACT_CD4_TCELL_6H_DN
Immunologic_signatures	GSE411_UNSTIM_VS_100MIN_IL6_STIM_MACROPHAGE_DN	200	3	0.0007741397749263643	0.032235974217446554	PDZK1:CISD3:LRRC16A	http://www.broadinstitute.org/gsea/msigdb/cards/GSE411_UNSTIM_VS_100MIN_IL6_STIM_MACROPHAGE_DN
Immunologic_signatures	GSE17721_CPG_VS_GARDIQUIMOD_8H_BMDC_DN	200	3	0.0007741397749263643	0.032235974217446554	STAP2:LRRC16A:SEC63	http://www.broadinstitute.org/gsea/msigdb/cards/GSE17721_CPG_VS_GARDIQUIMOD_8H_BMDC_DN
Positional_gene_sets	chr1q21	282	4	0.00028971440446480035	0.018689868566928676	ANKRD35:PDZK1:SETDB1:FAM63A	http://www.broadinstitute.org/gsea/msigdb/cards/chr1q21
Positional_gene_sets	chr1q32	158	3	0.000319055165083761	0.018689868566928676	NR5A2:ZC3H11A:HHAT	http://www.broadinstitute.org/gsea/msigdb/cards/chr1q32
Wikipathways	Wnt Signaling Pathway and Pluripotency%WikiPathways_20190110%WP399%Homo sapiens	103	3	6.14359e+10	0.007504718439524822	LRRK2:PRKCA:DVL3	http://www.wikipathways.org/instance/WP399_r94890
Wikipathways	MAPK Signaling Pathway%WikiPathways_20190110%WP382%Homo sapiens	249	4	0.00016304544597619495	0.01320668112407179	DUSP10:LRRK2:PRKCA:CACNA2D1	http://www.wikipathways.org/instance/WP382_r96995
GO_mf	GO_CLATHRIN_BINDING	64	4	2.17564e+08	0.0001960254952929576	LRRK2:RPH3A:RPH3AL:SMAP1	http://www.broadinstitute.org/gsea/msigdb/cards/GO_CLATHRIN_BINDING
GO_mf	GO_SYNTAXIN_BINDING	91	3	3.78323e+11	0.01704346817901009	LRRK2:RPH3A:RPH3AL	http://www.broadinstitute.org/gsea/msigdb/cards/GO_SYNTAXIN_BINDING
GO_mf	GO_SNARE_BINDING	126	3	0.00013423510553282986	0.01749725583899638	LRRK2:RPH3A:RPH3AL	http://www.broadinstitute.org/gsea/msigdb/cards/GO_SNARE_BINDING
GO_mf	GO_GTPASE_BINDING	295	4	0.0003561249917020863	0.01749725583899638	LRRK2:RPH3A:RPH3AL:DVL3	http://www.broadinstitute.org/gsea/msigdb/cards/GO_GTPASE_BINDING
GO_mf	GO_MACROMOLECULAR_COMPLEX_BINDING	1398	9	0.0005466317780865916	0.018750899561041708	PDZK1:SETDB1:NR5A2:NEBL:LRRK2:RPH3A:PCGF2:LRRC16A:TG	http://www.broadinstitute.org/gsea/msigdb/cards/GO_MACROMOLECULAR_COMPLEX_BINDING
GO_mf	GO_PHOSPHOLIPID_BINDING	359	4	0.0008644825861439976	0.025125768068249735	NR5A2:RPH3A:RPH3AL:AGAP1	http://www.broadinstitute.org/gsea/msigdb/cards/GO_PHOSPHOLIPID_BINDING
GO_mf	GO_ZINC_ION_BINDING	1141	7	0.0022961127610515233	0.03629469469662145	SETDB1:LHX4:NR5A2:RPH3A:PCGF2:PRKCA:TRIM31	http://www.broadinstitute.org/gsea/msigdb/cards/GO_ZINC_ION_BINDING
GO_mf	GO_ENZYME_BINDING	1735	9	0.002754355205436963	0.03982909847326839	LRRK2:RPH3A:NBEA:PARN:RPH3AL:PRKCA:DVL3:PRKAR1B:NRG1:NRG1-IT2	http://www.broadinstitute.org/gsea/msigdb/cards/GO_ENZYME_BINDING
GO_mf	GO_ENZYME_ACTIVATOR_ACTIVITY	469	4	0.002784942512559277	0.03982909847326839	LRRK2:AGAP1:SMAP1:NRG1:NRG1-IT2	http://www.broadinstitute.org/gsea/msigdb/cards/GO_ENZYME_ACTIVATOR_ACTIVITY
GO_mf	GO_PROTEIN_COMPLEX_BINDING	935	6	0.0030329270894751035	0.041404050115410124	PDZK1:NEBL:LRRK2:RPH3A:LRRC16A:TG	http://www.broadinstitute.org/gsea/msigdb/cards/GO_PROTEIN_COMPLEX_BINDING
GO_mf	GO_GUANYL_NUCLEOTIDE_EXCHANGE_FACTOR_ACTIVITY	303	3	0.0035188077213480226	0.04571935587360094	EIF2B5:ELMO1:NRG1:NRG1-IT2	http://www.broadinstitute.org/gsea/msigdb/cards/GO_GUANYL_NUCLEOTIDE_EXCHANGE_FACTOR_ACTIVITY
Curated_gene_sets	GOZGIT_ESR1_TARGETS_DN	757	9	3.26283e+09	0.006140906490859035	DHRS3:ANKRD35:PDZK1:NR5A2:DUSP10:NEBL:NBEA:PRKCA:STAP2	http://www.broadinstitute.org/gsea/msigdb/cards/GOZGIT_ESR1_TARGETS_DN
Curated_gene_sets	DAVICIONI_PAX_FOXO1_SIGNATURE_IN_ARMS_UP	59	3	6.76891e+09	0.006140906490859035	NEBL:PRKCA:TNS3	http://www.broadinstitute.org/gsea/msigdb/cards/DAVICIONI_PAX_FOXO1_SIGNATURE_IN_ARMS_UP
Curated_gene_sets	ZHENG_BOUND_BY_FOXP3	489	7	7.28615e+09	0.006140906490859035	NR5A2:THADA:FERMT1:SUMF1:ELMO1:TMEM71:TG	http://www.broadinstitute.org/gsea/msigdb/cards/ZHENG_BOUND_BY_FOXP3
Curated_gene_sets	KORKOLA_YOLK_SAC_TUMOR	61	3	7.73739e+08	0.006140906490859035	PDZK1:LRRN1:NRG1:NRG1-IT2	http://www.broadinstitute.org/gsea/msigdb/cards/KORKOLA_YOLK_SAC_TUMOR
Curated_gene_sets	BENPORATH_NOS_TARGETS	178	4	3.35084e+10	0.010587141721081675	DHRS3:NEBL:LRRN1:CACNA2D1	http://www.broadinstitute.org/gsea/msigdb/cards/BENPORATH_NOS_TARGETS
Curated_gene_sets	REACTOME_SIGNALING_BY_ERBB2	97	3	4.85936e+10	0.01157012965367983	PRKCA:PRKAR1B:NRG1:NRG1-IT2	http://www.broadinstitute.org/gsea/msigdb/cards/REACTOME_SIGNALING_BY_ERBB2
Curated_gene_sets	SHETH_LIVER_CANCER_VS_TXNIP_LOSS_PAM1	228	4	0.00010808967532195037	0.01748699526830494	NEBL:BICC1:RPH3A:PRKCA	http://www.broadinstitute.org/gsea/msigdb/cards/SHETH_LIVER_CANCER_VS_TXNIP_LOSS_PAM1
Curated_gene_sets	KOYAMA_SEMA3B_TARGETS_DN	403	5	0.00018089591343253632	0.02089838449792816	DHRS3:TERT:ANKRD33B:TNS3:DPY19L2P2	http://www.broadinstitute.org/gsea/msigdb/cards/KOYAMA_SEMA3B_TARGETS_DN
Curated_gene_sets	ONKEN_UVEAL_MELANOMA_UP	779	7	0.00019283302953569854	0.021007071986331345	SETDB1:ZC3H11A:PCGF2:PRKCA:PTPRM:AGAP1:SEC63	http://www.broadinstitute.org/gsea/msigdb/cards/ONKEN_UVEAL_MELANOMA_UP
Curated_gene_sets	BOSCO_ALLERGEN_INDUCED_TH2_ASSOCIATED_MODULE	149	3	0.0002552632107043678	0.021398793992765286	DHRS3:LRRN1:TMEM71	http://www.broadinstitute.org/gsea/msigdb/cards/BOSCO_ALLERGEN_INDUCED_TH2_ASSOCIATED_MODULE
Curated_gene_sets	GRYDER_PAX3FOXO1_TOP_ENHANCERS	432	5	0.0002626620965991423	0.021398793992765286	NDUFA12:PARN:ELMO1:TNS3:NRG1:NRG1-IT2	http://www.broadinstitute.org/gsea/msigdb/cards/GRYDER_PAX3FOXO1_TOP_ENHANCERS
Curated_gene_sets	SABATES_COLORECTAL_ADENOMA_DN	288	4	0.00031907653386233016	0.02302185536746085	PDZK1:NR5A2:LRRK2:CHRNA1	http://www.broadinstitute.org/gsea/msigdb/cards/SABATES_COLORECTAL_ADENOMA_DN
Curated_gene_sets	BENPORATH_OCT4_TARGETS	289	4	0.00032418160601077926	0.02304108668393031	DHRS3:NEBL:LRRN1:CACNA2D1	http://www.broadinstitute.org/gsea/msigdb/cards/BENPORATH_OCT4_TARGETS
Curated_gene_sets	ONDER_CDH1_TARGETS_2_DN	463	5	0.0003796795990439087	0.024767592474617718	DUSP10:HS3ST2:STAP2:FERMT1:NRG1:NRG1-IT2	http://www.broadinstitute.org/gsea/msigdb/cards/ONDER_CDH1_TARGETS_2_DN
Curated_gene_sets	FARMER_BREAST_CANCER_BASAL_VS_LULMINAL	328	4	0.0005764125845523813	0.028592465912900412	PDZK1:HHAT:GAL:NBEA	http://www.broadinstitute.org/gsea/msigdb/cards/FARMER_BREAST_CANCER_BASAL_VS_LULMINAL
Curated_gene_sets	MULLIGHAN_NPM1_SIGNATURE_3_UP	337	4	0.0006511844844535092	0.029140729245884213	TRIM31:TNS3:CACNA2D1:DPY19L2P2	http://www.broadinstitute.org/gsea/msigdb/cards/MULLIGHAN_NPM1_SIGNATURE_3_UP
Curated_gene_sets	KASLER_HDAC7_TARGETS_1_UP	194	3	0.0006910381296377885	0.029140729245884213	ZC3H11A:DUSP10:TG	http://www.broadinstitute.org/gsea/msigdb/cards/KASLER_HDAC7_TARGETS_1_UP
Curated_gene_sets	BENPORATH_SOX2_TARGETS	733	6	0.0007599124401181851	0.029367859535645947	DHRS3:NEBL:AQP2:STAP2:LRRN1:CACNA2D1	http://www.broadinstitute.org/gsea/msigdb/cards/BENPORATH_SOX2_TARGETS
Curated_gene_sets	MEISSNER_NPC_HCP_WITH_H3_UNMETHYLATED	534	5	0.0008010768289597542	0.029367859535645947	HHAT:GAL:FBRSL1:HS3ST2:PRKAR1B	http://www.broadinstitute.org/gsea/msigdb/cards/MEISSNER_NPC_HCP_WITH_H3_UNMETHYLATED
Curated_gene_sets	GRYDER_PAX3FOXO1_ENHANCERS_IN_TADS	975	7	0.0008509310174805874	0.029367859535645947	NDUFA12:PARN:AGAP1:SUMF1:ELMO1:TNS3:NRG1:NRG1-IT2	http://www.broadinstitute.org/gsea/msigdb/cards/GRYDER_PAX3FOXO1_ENHANCERS_IN_TADS
Curated_gene_sets	MIKKELSEN_MEF_ICP_WITH_H3K27ME3	206	3	0.000864071789627788	0.029367859535645947	NR5A2:AQP2:ELMO1	http://www.broadinstitute.org/gsea/msigdb/cards/MIKKELSEN_MEF_ICP_WITH_H3K27ME3
Curated_gene_sets	YOSHIMURA_MAPK8_TARGETS_DN	366	4	0.0009421729279973259	0.02939526921486304	PTPRM:EIF2B5:TNS3:NRG1:NRG1-IT2	http://www.broadinstitute.org/gsea/msigdb/cards/YOSHIMURA_MAPK8_TARGETS_DN
Curated_gene_sets	BHAT_ESR1_TARGETS_NOT_VIA_AKT1_UP	211	3	0.0009444511108513325	0.02939526921486304	DHRS3:PDZK1:LHX4	http://www.broadinstitute.org/gsea/msigdb/cards/BHAT_ESR1_TARGETS_NOT_VIA_AKT1_UP
Curated_gene_sets	ZHOU_INFLAMMATORY_RESPONSE_LIVE_DN	378	4	0.0010873044088265944	0.030902909799676078	DDI2:THADA:AGAP1:NRG1:NRG1-IT2	http://www.broadinstitute.org/gsea/msigdb/cards/ZHOU_INFLAMMATORY_RESPONSE_LIVE_DN
Curated_gene_sets	MIYAGAWA_TARGETS_OF_EWSR1_ETS_FUSIONS_DN	223	3	0.0011586212779327453	0.03204640546843229	FAM63A:SEC63:NRG1:NRG1-IT2	http://www.broadinstitute.org/gsea/msigdb/cards/MIYAGAWA_TARGETS_OF_EWSR1_ETS_FUSIONS_DN
Curated_gene_sets	MONNIER_POSTRADIATION_TUMOR_ESCAPE_UP	393	4	0.0012913229862811513	0.03318773666665527	CISD3:PRKCA:ANKRD33B:TNS3	http://www.broadinstitute.org/gsea/msigdb/cards/MONNIER_POSTRADIATION_TUMOR_ESCAPE_UP
Curated_gene_sets	KONDO_EZH2_TARGETS	240	3	0.0015173246804574374	0.03464337443846192	NEBL:PRKAR1B:ELMO1	http://www.broadinstitute.org/gsea/msigdb/cards/KONDO_EZH2_TARGETS
Curated_gene_sets	MEISSNER_BRAIN_HCP_WITH_H3K4ME3_AND_H3K27ME3	1068	7	0.0015204672947581983	0.03464337443846192	DHRS3:DUSP10:HS3ST2:SORCS2:ANKRD33B:B3GAT2:TNS3	http://www.broadinstitute.org/gsea/msigdb/cards/MEISSNER_BRAIN_HCP_WITH_H3K4ME3_AND_H3K27ME3
Curated_gene_sets	CHYLA_CBFA2T3_TARGETS_DN	242	3	0.001564061865822255	0.03546696478593133	GAL:AGAP1:KEL	http://www.broadinstitute.org/gsea/msigdb/cards/CHYLA_CBFA2T3_TARGETS_DN
Curated_gene_sets	GOBERT_OLIGODENDROCYTE_DIFFERENTIATION_DN	1078	7	0.0016121930259128372	0.03608469116590919	FAM63A:DUSP10:PRKCA:PTPRM:PRKAR1B:CACNA2D1:TMEM71	http://www.broadinstitute.org/gsea/msigdb/cards/GOBERT_OLIGODENDROCYTE_DIFFERENTIATION_DN
Curated_gene_sets	DACOSTA_UV_RESPONSE_VIA_ERCC3_DN	851	6	0.0017928795707312691	0.03816575873820486	SETDB1:PARN:PRKCA:PTPRM:AGAP1:NRG1:NRG1-IT2	http://www.broadinstitute.org/gsea/msigdb/cards/DACOSTA_UV_RESPONSE_VIA_ERCC3_DN
Curated_gene_sets	BOYLAN_MULTIPLE_MYELOMA_C_D_DN	252	3	0.0018128815547257635	0.03816575873820486	DHRS3:NBEA:TNS3	http://www.broadinstitute.org/gsea/msigdb/cards/BOYLAN_MULTIPLE_MYELOMA_C_D_DN
Curated_gene_sets	GRYDER_PAX3FOXO1_ENHANCERS_KO_DOWN	428	4	0.0018761793977817025	0.03834491970916939	SUMF1:ELMO1:TNS3:NRG1:NRG1-IT2	http://www.broadinstitute.org/gsea/msigdb/cards/GRYDER_PAX3FOXO1_ENHANCERS_KO_DOWN
Curated_gene_sets	ONDER_CDH1_TARGETS_2_UP	255	3	0.001892580815286809	0.03835093549955653	NEBL:BICC1:PRKCA	http://www.broadinstitute.org/gsea/msigdb/cards/ONDER_CDH1_TARGETS_2_UP
Curated_gene_sets	DAVICIONI_TARGETS_OF_PAX_FOXO1_FUSIONS_UP	255	3	0.001892580815286809	0.03835093549955653	NEBL:PRKCA:TNS3	http://www.broadinstitute.org/gsea/msigdb/cards/DAVICIONI_TARGETS_OF_PAX_FOXO1_FUSIONS_UP
Curated_gene_sets	JAEGER_METASTASIS_DN	257	3	0.001947043841626478	0.03911316525548691	NEBL:STAP2:FERMT1	http://www.broadinstitute.org/gsea/msigdb/cards/JAEGER_METASTASIS_DN
Curated_gene_sets	BENPORATH_ES_WITH_H3K27ME3	1114	7	0.001979477704026112	0.03911316525548691	ANKRD35:LHX4:HHAT:HS3ST2:SCTR:DPY19L2P2:NRG1:NRG1-IT2	http://www.broadinstitute.org/gsea/msigdb/cards/BENPORATH_ES_WITH_H3K27ME3
Curated_gene_sets	BENPORATH_PRC2_TARGETS	649	5	0.0021587324759026302	0.04128467490059568	LHX4:HHAT:SCTR:DPY19L2P2:NRG1:NRG1-IT2	http://www.broadinstitute.org/gsea/msigdb/cards/BENPORATH_PRC2_TARGETS
Curated_gene_sets	KEGG_MAPK_SIGNALING_PATHWAY	267	3	0.0022357320444639376	0.04158810935834871	DUSP10:PRKCA:CACNA2D1	http://www.broadinstitute.org/gsea/msigdb/cards/KEGG_MAPK_SIGNALING_PATHWAY
Curated_gene_sets	TORCHIA_TARGETS_OF_EWSR1_FLI1_FUSION_UP	270	3	0.0023277925938129454	0.043016906781784305	DUSP10:NBEA:TG	http://www.broadinstitute.org/gsea/msigdb/cards/TORCHIA_TARGETS_OF_EWSR1_FLI1_FUSION_UP
Curated_gene_sets	CHARAFE_BREAST_CANCER_LUMINAL_VS_BASAL_DN	450	4	0.0023312597643111864	0.043016906781784305	BICC1:PTPRM:FERMT1:ANKRD33B	http://www.broadinstitute.org/gsea/msigdb/cards/CHARAFE_BREAST_CANCER_LUMINAL_VS_BASAL_DN
Curated_gene_sets	MULLIGHAN_NPM1_MUTATED_SIGNATURE_1_UP	272	3	0.002390598661544878	0.043450499336934005	TNS3:CACNA2D1:DPY19L2P2	http://www.broadinstitute.org/gsea/msigdb/cards/MULLIGHAN_NPM1_MUTATED_SIGNATURE_1_UP
Curated_gene_sets	PEREZ_TP53_TARGETS	1153	7	0.002449069567579443	0.0443439896608871	DHRS3:FAM63A:FBRSL1:AGAP1:LRRN1:DVL3:DPY19L2P2	http://www.broadinstitute.org/gsea/msigdb/cards/PEREZ_TP53_TARGETS
Curated_gene_sets	CHARAFE_BREAST_CANCER_LUMINAL_VS_MESENCHYMAL_DN	460	4	0.0025627213361710793	0.0454128969988524	BICC1:PRKCA:PTPRM:ANKRD33B	http://www.broadinstitute.org/gsea/msigdb/cards/CHARAFE_BREAST_CANCER_LUMINAL_VS_MESENCHYMAL_DN
Curated_gene_sets	BHAT_ESR1_TARGETS_VIA_AKT1_UP	281	3	0.002687717000724509	0.04603923869586371	DHRS3:PDZK1:LHX4	http://www.broadinstitute.org/gsea/msigdb/cards/BHAT_ESR1_TARGETS_VIA_AKT1_UP
Curated_gene_sets	PASQUALUCCI_LYMPHOMA_BY_GC_STAGE_UP	283	3	0.0027570272459219282	0.04636073609866597	NBEA:TERT:TG	http://www.broadinstitute.org/gsea/msigdb/cards/PASQUALUCCI_LYMPHOMA_BY_GC_STAGE_UP
Curated_gene_sets	ACEVEDO_FGFR1_TARGETS_IN_PROSTATE_CANCER_MODEL_UP	289	3	0.002972303428438393	0.048472975774738455	LRRK2:TRIM31:TMEM71	http://www.broadinstitute.org/gsea/msigdb/cards/ACEVEDO_FGFR1_TARGETS_IN_PROSTATE_CANCER_MODEL_UP
Curated_gene_sets	HELLER_HDAC_TARGETS_DN	291	3	0.0030465457506848475	0.04939632044081056	PDZK1:FERMT1:TNS3	http://www.broadinstitute.org/gsea/msigdb/cards/HELLER_HDAC_TARGETS_DN
Oncogenic_signatures	KRAS.PROSTATE_UP.V1_UP	137	4	9.4936e+08	0.0013043716874293239	NBEA:FSD1:TRIM31:TG	http://www.broadinstitute.org/gsea/msigdb/cards/KRAS.PROSTATE_UP.V1_UP
Oncogenic_signatures	CSR_EARLY_UP.V1_DN	148	4	1.38029e+11	0.0013043716874293239	DHRS3:FAM63A:LRRK2:ANKRD33B	http://www.broadinstitute.org/gsea/msigdb/cards/CSR_EARLY_UP.V1_DN
Oncogenic_signatures	CSR_LATE_UP.V1_DN	167	3	0.00039354124786064544	0.01901952620910438	NBEA:SUMF1:ANKRD33B	http://www.broadinstitute.org/gsea/msigdb/cards/CSR_LATE_UP.V1_DN
Oncogenic_signatures	ESC_V6.5_UP_EARLY.V1_UP	169	3	0.00041164435028508904	0.01901952620910438	PDZK1:AQP2:TERT	http://www.broadinstitute.org/gsea/msigdb/cards/ESC_V6.5_UP_EARLY.V1_UP
Oncogenic_signatures	EGFR_UP.V1_UP	193	3	0.0006778307063773938	0.01901952620910438	GAL:LRRC16A:TNS3	http://www.broadinstitute.org/gsea/msigdb/cards/EGFR_UP.V1_UP
Oncogenic_signatures	KRAS.DF.V1_DN	193	3	0.0006778307063773938	0.01901952620910438	FAM63A:DVL3:SMAP1	http://www.broadinstitute.org/gsea/msigdb/cards/KRAS.DF.V1_DN
Oncogenic_signatures	MEK_UP.V1_UP	195	3	0.0007044268966334956	0.01901952620910438	GAL:AGAP1:TNS3	http://www.broadinstitute.org/gsea/msigdb/cards/MEK_UP.V1_UP
microRNA_targets	CAAGGAT_MIR362	66	3	1.06036e+10	0.002343403623695641	LHX4:PRKCA:DVL3	http://www.broadinstitute.org/gsea/msigdb/cards/CAAGGAT_MIR362
microRNA_targets	ATGTCAC_MIR489	87	3	3.17033e+11	0.0035032153806249028	CCDC178:THADA:NRG1:NRG1-IT2	http://www.broadinstitute.org/gsea/msigdb/cards/ATGTCAC_MIR489
microRNA_targets	TGTGTGA_MIR377	199	4	5.69499e+10	0.004195307212727047	NBEA:THADA:SUMF1:NRG1:NRG1-IT2	http://www.broadinstitute.org/gsea/msigdb/cards/TGTGTGA_MIR377
microRNA_targets	AAGCACA_MIR218	398	5	0.00016911233783642948	0.007474765332370183	NEBL:HS3ST2:PCGF2:ELMO1:SGCZ	http://www.broadinstitute.org/gsea/msigdb/cards/AAGCACA_MIR218
microRNA_targets	GCAAAAA_MIR129	183	3	0.0005554239096295952	0.015343585503517564	DUSP10:NEBL:AGAP1	http://www.broadinstitute.org/gsea/msigdb/cards/GCAAAAA_MIR129
microRNA_targets	TTTGTAG_MIR520D	336	4	0.000642535785061611	0.01577782316651289	NR5A2:NEBL:NBEA:LRRN1	http://www.broadinstitute.org/gsea/msigdb/cards/TTTGTAG_MIR520D
microRNA_targets	AAAGGGA_MIR204_MIR211	224	3	0.0011778783167251381	0.022175108475398515	NBEA:DVL3:SGCZ	http://www.broadinstitute.org/gsea/msigdb/cards/AAAGGGA_MIR204_MIR211
microRNA_targets	GGCAGCT_MIR22	229	3	0.0012775424776692945	0.022175108475398515	THADA:LRRC16A:SMAP1	http://www.broadinstitute.org/gsea/msigdb/cards/GGCAGCT_MIR22
microRNA_targets	AACTGGA_MIR145	233	3	0.0013614125856942691	0.022175108475398515	ZC3H11A:LRRC16A:ELMO1	http://www.broadinstitute.org/gsea/msigdb/cards/AACTGGA_MIR145
microRNA_targets	CTTTGCA_MIR527	235	3	0.0014047580029664217	0.022175108475398515	NBEA:PRKCA:PTPRM	http://www.broadinstitute.org/gsea/msigdb/cards/CTTTGCA_MIR527
microRNA_targets	ATTCTTT_MIR186	270	3	0.0023277925938129454	0.03026130371956829	NR5A2:ZC3H11A:LRRN1	http://www.broadinstitute.org/gsea/msigdb/cards/ATTCTTT_MIR186
microRNA_targets	CATTTCA_MIR203	286	3	0.0028632781694709047	0.03515469308072611	NBEA:PRKCA:CCDC178	http://www.broadinstitute.org/gsea/msigdb/cards/CATTTCA_MIR203
TF_targets	WGGAATGY_TEF1_Q6	375	6	1.20977e+11	0.004429950401866801	LHX4:RPH3AL:CHRNA1:FERMT1:DVL3:NRG1:NRG1-IT2	http://www.broadinstitute.org/gsea/msigdb/cards/WGGAATGY_TEF1_Q6
TF_targets	FOXO4_02	255	5	1.44063e+10	0.004429950401866801	FAM63A:AQP2:CACNA2D1:NRG1:NRG1-IT2:TMEM71	http://www.broadinstitute.org/gsea/msigdb/cards/FOXO4_02
TF_targets	CDP_02	107	3	7.12681e+10	0.009287061424024516	FAM63A:DUSP10:PCGF2	http://www.broadinstitute.org/gsea/msigdb/cards/CDP_02
TF_targets	ARGGGTTAA_UNKNOWN	119	3	0.00010765104262503447	0.009287061424024516	DHRS3:DUSP10:RPH3A	http://www.broadinstitute.org/gsea/msigdb/cards/ARGGGTTAA_UNKNOWN
TF_targets	TGCTGAY_UNKNOWN	532	6	0.0001103522617878966	0.009287061424024516	DHRS3:FAM63A:LRRN1:LRRC16A:NRG1:NRG1-IT2:TMEM71	http://www.broadinstitute.org/gsea/msigdb/cards/TGCTGAY_UNKNOWN
TF_targets	TCF4_Q5	238	4	0.00013210994663007762	0.009287061424024516	FAM63A:LHX4:AGAP1:ELMO1	http://www.broadinstitute.org/gsea/msigdb/cards/TCF4_Q5
TF_targets	FOXO1_02	239	4	0.000134719559468923	0.009287061424024516	DHRS3:CACNA2D1:NRG1:NRG1-IT2:TMEM71	http://www.broadinstitute.org/gsea/msigdb/cards/FOXO1_02
TF_targets	FOXO3_01	242	4	0.00014278595159695763	0.009287061424024516	AQP2:CACNA2D1:NRG1:NRG1-IT2:TMEM71	http://www.broadinstitute.org/gsea/msigdb/cards/FOXO3_01
TF_targets	TAL1BETAE47_01	245	4	0.00015121717225887474	0.009287061424024516	DUSP10:LRRN1:ELMO1:TMEM71	http://www.broadinstitute.org/gsea/msigdb/cards/TAL1BETAE47_01
TF_targets	TAL1ALPHAE47_01	250	4	0.0001661100417305198	0.009287061424024516	DUSP10:LRRN1:ELMO1:TMEM71	http://www.broadinstitute.org/gsea/msigdb/cards/TAL1ALPHAE47_01
TF_targets	DR4_Q2	259	4	0.0001957158278369625	0.00976562526366916	LHX4:NR5A2:DUSP10:NRG1:NRG1-IT2	http://www.broadinstitute.org/gsea/msigdb/cards/DR4_Q2
TF_targets	LMO2COM_01	262	4	0.0002064278511019497	0.00976562526366916	NBEA:LRRN1:SORCS2:ELMO1	http://www.broadinstitute.org/gsea/msigdb/cards/LMO2COM_01
TF_targets	ER_Q6_01	268	4	0.00022918837610936855	0.010067917950518689	PDZK1:HS3ST2:LRRN1:TMEM71	http://www.broadinstitute.org/gsea/msigdb/cards/ER_Q6_01
TF_targets	TGACAGNY_MEIS1_01	824	7	0.00028146746044545746	0.011540165878263755	DHRS3:ANKRD35:FAM63A:CHRNA1:ELMO1:NRG1:NRG1-IT2:TMEM71	http://www.broadinstitute.org/gsea/msigdb/cards/TGACAGNY_MEIS1_01
TF_targets	TAAYNRNNTCC_UNKNOWN	170	3	0.0004209154741536795	0.016178938537782055	NR5A2:DUSP10:AQP2	http://www.broadinstitute.org/gsea/msigdb/cards/TAAYNRNNTCC_UNKNOWN
TF_targets	YTATTTTNR_MEF2_02	692	6	0.0005417522908366377	0.018509869936918454	LHX4:DUSP10:RPH3A:NBEA:LRRC16A:TMEM71	http://www.broadinstitute.org/gsea/msigdb/cards/YTATTTTNR_MEF2_02
TF_targets	CTTTGA_LEF1_Q2	1218	8	0.0008399625926953981	0.027188262868824725	FAM63A:LHX4:DUSP10:NBEA:CHRNA1:ELMO1:NRG1:NRG1-IT2:TMEM71	http://www.broadinstitute.org/gsea/msigdb/cards/CTTTGA_LEF1_Q2
TF_targets	CTGCAGY_UNKNOWN	761	6	0.0009452588656882597	0.027682581066584746	LHX4:NBEA:AGAP1:DVL3:ELMO1:NRG1:NRG1-IT2	http://www.broadinstitute.org/gsea/msigdb/cards/CTGCAGY_UNKNOWN
TF_targets	LEF1_Q2	222	3	0.0011395862331071904	0.031856615152769184	FAM63A:LHX4:DUSP10	http://www.broadinstitute.org/gsea/msigdb/cards/LEF1_Q2
TF_targets	GGATTA_PITX2_Q2	582	5	0.0012462929413837127	0.03332478951960797	DHRS3:DUSP10:NEBL:TERT:ELMO1	http://www.broadinstitute.org/gsea/msigdb/cards/GGATTA_PITX2_Q2
TF_targets	GATA3_01	241	3	0.0015405697017760464	0.03789801466369074	NR5A2:AQP2:FERMT1	http://www.broadinstitute.org/gsea/msigdb/cards/GATA3_01
TF_targets	SRF_Q6	241	3	0.0015405697017760464	0.03789801466369074	DUSP10:AQP2:DVL3	http://www.broadinstitute.org/gsea/msigdb/cards/SRF_Q6
TF_targets	AREB6_03	254	3	0.0018657497322353016	0.03929716077975169	NBEA:LRRN1:ELMO1	http://www.broadinstitute.org/gsea/msigdb/cards/AREB6_03
TF_targets	TAL1BETAITF2_01	254	3	0.0018657497322353016	0.03929716077975169	DUSP10:ELMO1:TMEM71	http://www.broadinstitute.org/gsea/msigdb/cards/TAL1BETAITF2_01
TF_targets	PXR_Q2	256	3	0.0019196783942114954	0.03929716077975169	DHRS3:NR5A2:NRG1:NRG1-IT2	http://www.broadinstitute.org/gsea/msigdb/cards/PXR_Q2
TF_targets	LEF1_Q6	257	3	0.001947043841626478	0.03929716077975169	LHX4:LRRN1:CACNA2D1	http://www.broadinstitute.org/gsea/msigdb/cards/LEF1_Q6
TF_targets	FREAC2_01	258	3	0.001974678528940418	0.03929716077975169	DHRS3:ELMO1:NRG1:NRG1-IT2	http://www.broadinstitute.org/gsea/msigdb/cards/FREAC2_01
TF_targets	ETS1_B	259	3	0.002002583826462727	0.03929716077975169	ELMO1:NRG1:NRG1-IT2:TMEM71	http://www.broadinstitute.org/gsea/msigdb/cards/ETS1_B
TF_targets	HEB_Q6	265	3	0.0021757749411675125	0.04026480547267233	DHRS3:PDZK1:DVL3	http://www.broadinstitute.org/gsea/msigdb/cards/HEB_Q6
TF_targets	HNF4ALPHA_Q6	270	3	0.0023277925938129454	0.04026480547267233	DHRS3:PDZK1:LRRN1	http://www.broadinstitute.org/gsea/msigdb/cards/HNF4ALPHA_Q6
TF_targets	AP4_Q5	271	3	0.002359051491280116	0.04026480547267233	DHRS3:AQP2:NBEA	http://www.broadinstitute.org/gsea/msigdb/cards/AP4_Q5
TF_targets	HAND1E47_01	273	3	0.002422435451201425	0.04026480547267233	DVL3:ELMO1:NRG1:NRG1-IT2	http://www.broadinstitute.org/gsea/msigdb/cards/HAND1E47_01
TF_targets	TCANNTGAY_SREBP1_01	472	4	0.00286202953574905	0.04513200421758117	PDZK1:NR5A2:RPH3A:LRRN1	http://www.broadinstitute.org/gsea/msigdb/cards/TCANNTGAY_SREBP1_01
TF_targets	GATAAGR_GATA_C	294	3	0.003160273613678025	0.04768005890937297	NR5A2:NEBL:AQP2	http://www.broadinstitute.org/gsea/msigdb/cards/GATAAGR_GATA_C
TF_targets	TTANTCA_UNKNOWN	943	6	0.003178670593958198	0.04768005890937297	NR5A2:AQP2:RPH3A:PTPRM:FERMT1:LRRN1	http://www.broadinstitute.org/gsea/msigdb/cards/TTANTCA_UNKNOWN
Reactome	REACTOME_SIGNALING_BY_ERBB2	97	3	4.85936e+10	0.010917355994092406	PRKCA:PRKAR1B:NRG1:NRG1-IT2	http://www.broadinstitute.org/gsea/msigdb/cards/REACTOME_SIGNALING_BY_ERBB2
Canonical_Pathways	REACTOME_SIGNALING_BY_ERBB2	97	3	4.85936e+10	0.005264005322406121	PRKCA:PRKAR1B:NRG1:NRG1-IT2	http://www.broadinstitute.org/gsea/msigdb/cards/REACTOME_SIGNALING_BY_ERBB2
Canonical_Pathways	KEGG_MAPK_SIGNALING_PATHWAY	267	3	0.0022357320444639376	0.02415681209018352	DUSP10:PRKCA:CACNA2D1	http://www.broadinstitute.org/gsea/msigdb/cards/KEGG_MAPK_SIGNALING_PATHWAY
Cancer_molecules	MODULE_9	124	3	0.0001262029916404106	0.03340637214543183	DHRS3:AQP2:TERT	http://www.broadinstitute.org/gsea/msigdb/cards/MODULE_9
