# Supplementary material for: A multilayered post-GWAS assessment on genetic susceptibility to pancreatic cancer
Source: Genome Med. 2021 Feb 1;13:15. doi: 10.1186/s13073-020-00816-4 (PMC7849104; doi:10.1186/s13073-020-00816-4)
Supplement: Supplementary file 6 — Additional file 6: Table S8. Results from the gene enrichment analysis performed with FUMA in the 2D prioritized genes. [file 13073_2020_816_MOESM6_ESM.xlsx]

## Sheet: Table S8- Results from FUMA - 5
Table S8. Results from the gene enrichment analysis performed with FUMA in the 2D prioritized genes
Category	GeneSet	N_genes	N_overlap	p	adjP	genes	link
GO_bp	GO_SENSORY_PERCEPTION_OF_SMELL	407	67	1.08674e-17	7.98751e-16	OR10T2:OR10K2:OR10K1:OR10R2:OR6Y1:OR6P1:OR10X1:OR10Z1:OR56B1:OR52N4:OR52N5:OR5P2:OR5P3:OR10A6:OR4B1:OR4X2:OR4X1:OR4S1:OR4C3:OR4C5:OR4A47:OR4C13:OR4C12:OR4C16:OR4C11:OR4P4:OR4S2:OR4C6:OR5D13:OR5D14:OR5L1:OR5D18:OR5L2:OR5D16:OR5W2:OR5I1:OR10AG1:OR5F1:OR5AS1:OR8I2:OR8H2:OR8H3:OR8J3:OR8K5:OR5J2:OR5T2:OR5T3:OR5T1:OR8H1:OR8K3:OR8K1:OR8J1:OR8U1:OR5R1:OR5M9:OR5M3:OR5M8:OR5M11:OR5M10:OR5M1:OR5AP2:OR5AR1:O…	http://www.gsea-msigdb.org/gsea/msigdb/cards/GO_SENSORY_PERCEPTION_OF_SMELL
GO_bp	GO_SENSORY_PERCEPTION_OF_CHEMICAL_STIMULUS	476	71	7.53906e-19	2.7706e-14	OR10T2:OR10K2:OR10K1:OR10R2:OR6Y1:OR6P1:OR10X1:OR10Z1:OR56B1:OR52N4:OR52N5:OR5P2:OR5P3:OR10A6:OR4B1:OR4X2:OR4X1:OR4S1:OR4C3:OR4C5:OR4A47:OR4C13:OR4C12:OR4C16:OR4C11:OR4P4:OR4S2:OR4C6:OR5D13:OR5D14:OR5L1:OR5D18:OR5L2:OR5D16:OR5W2:OR5I1:OR10AG1:OR5F1:OR5AS1:OR8I2:OR8H2:OR8H3:OR8J3:OR8K5:OR5J2:OR5T2:OR5T3:OR5T1:OR8H1:OR8K3:OR8K1:OR8J1:OR8U1:OR5R1:OR5M9:OR5M3:OR5M8:OR5M11:OR5M10:OR5M1:OR5AP2:OR5AR1:O…	http://www.gsea-msigdb.org/gsea/msigdb/cards/GO_SENSORY_PERCEPTION_OF_CHEMICAL_STIMULUS
GO_bp	GO_DETECTION_OF_STIMULUS_INVOLVED_IN_SENSORY_PERCEPTION	481	70	1.06777e-15	2.61605e-12	OR10T2:OR10K2:OR10K1:OR10R2:OR6Y1:OR6P1:OR10X1:OR10Z1:OR56B1:OR52N4:OR52N5:OR5P2:OR5P3:OR10A6:OR4B1:OR4X2:OR4X1:OR4S1:OR4C3:OR4C5:OR4A47:OR4C13:OR4C12:OR4C16:OR4C11:OR4P4:OR4S2:OR4C6:OR5D13:OR5D14:OR5L1:OR5D18:OR5L2:OR5D16:OR5W2:OR5I1:OR10AG1:OR5F1:OR5AS1:OR8I2:OR8H2:OR8H3:OR8J3:OR8K5:OR5J2:OR5T2:OR5T3:OR5T1:OR8H1:OR8K3:OR8K1:OR8J1:OR8U1:OR5R1:OR5M9:OR5M3:OR5M8:OR5M11:OR5M10:OR5M1:OR5AP2:OR5AR1:O…	http://www.gsea-msigdb.org/gsea/msigdb/cards/GO_DETECTION_OF_STIMULUS_INVOLVED_IN_SENSORY_PERCEPTION
GO_bp	GO_DETECTION_OF_STIMULUS	638	71	7.57959e-10	1.39275e-05	OR10T2:OR10K2:OR10K1:OR10R2:OR6Y1:OR6P1:OR10X1:OR10Z1:OR56B1:OR52N4:OR52N5:OR5P2:OR5P3:OR10A6:OR4B1:OR4X2:OR4X1:OR4S1:OR4C3:OR4C5:OR4A47:OR4C13:OR4C12:OR4C16:OR4C11:OR4P4:OR4S2:OR4C6:OR5D13:OR5D14:OR5L1:OR5D18:OR5L2:OR5D16:OR5W2:OR5I1:OR10AG1:OR5F1:OR5AS1:OR8I2:OR8H2:OR8H3:OR8J3:OR8K5:OR5J2:OR5T2:OR5T3:OR5T1:OR8H1:OR8K3:OR8K1:OR8J1:OR8U1:OR5R1:OR5M9:OR5M3:OR5M8:OR5M11:OR5M10:OR5M1:OR5AP2:OR5AR1:O…	http://www.gsea-msigdb.org/gsea/msigdb/cards/GO_DETECTION_OF_STIMULUS
GO_bp	GO_SENSORY_PERCEPTION	916	81	9.66032e-07	0.0142007	SLC9A1:KCNQ4:OR10T2:OR10K2:OR10K1:OR10R2:OR6Y1:OR6P1:OR10X1:OR10Z1:OR56B1:OR52N4:OR52N5:OR5P2:OR5P3:OR10A6:OR4B1:OR4X2:OR4X1:OR4S1:OR4C3:OR4C5:OR4A47:OR4C13:OR4C12:OR4C16:OR4C11:OR4P4:OR4S2:OR4C6:OR5D13:OR5D14:OR5L1:OR5D18:OR5L2:OR5D16:OR5W2:OR5I1:OR10AG1:OR5F1:OR5AS1:OR8I2:OR8H2:OR8H3:OR8J3:OR8K5:OR5J2:OR5T2:OR5T3:OR5T1:OR8H1:OR8K3:OR8K1:OR8J1:OR8U1:OR5R1:OR5M9:OR5M3:OR5M8:OR5M11:OR5M10:OR5M1:OR…	http://www.gsea-msigdb.org/gsea/msigdb/cards/GO_SENSORY_PERCEPTION
GO_bp	GO_NERVOUS_SYSTEM_PROCESS	1362	93	0.291297	35.6838	SLC9A1:KCNQ4:OR10T2:OR10K2:OR10K1:OR10R2:OR6Y1:OR6P1:OR10X1:OR10Z1:DRD4:DEAF1:OR56B1:OR52N4:OR52N5:OR5P2:OR5P3:OR10A6:OR4B1:OR4X2:OR4X1:OR4S1:OR4C3:OR4C5:OR4A47:OR4C13:OR4C12:OR4C16:OR4C11:OR4P4:OR4S2:OR4C6:OR5D13:OR5D14:OR5L1:OR5D18:OR5L2:OR5D16:OR5W2:OR5I1:OR10AG1:OR5F1:OR5AS1:OR8I2:OR8H2:OR8H3:OR8J3:OR8K5:OR5J2:OR5T2:OR5T3:OR5T1:OR8H1:OR8K3:OR8K1:OR8J1:OR8U1:OR5R1:OR5M9:OR5M3:OR5M8:OR5M11:OR5M…	http://www.gsea-msigdb.org/gsea/msigdb/cards/GO_NERVOUS_SYSTEM_PROCESS
GO_bp	GO_G_PROTEIN_COUPLED_RECEPTOR_SIGNALING_PATHWAY	1302	88	0.456051	478.854	GPR3:WASF2:OR10T2:OR10K2:OR10K1:OR10R2:OR6Y1:OR6P1:OR10X1:OR10Z1:FZD8:SCT:DRD4:OR56B1:OR52N4:OR52N5:OR5P2:OR5P3:OR10A6:OR4B1:OR4X2:OR4X1:OR4S1:OR4C3:OR4C5:OR4A47:OR4C13:OR4C12:OR4C16:OR4C11:OR4P4:OR4S2:OR4C6:OR5D13:OR5D14:OR5L1:OR5D18:OR5L2:OR5D16:OR5W2:OR5I1:OR10AG1:OR5F1:OR5AS1:OR8I2:OR8H2:OR8H3:OR8J3:OR8K5:OR5J2:OR5T2:OR5T3:OR5T1:OR8H1:OR8K3:OR8K1:OR8J1:OR8U1:OR5R1:OR5M9:OR5M3:OR5M8:OR5M11:OR5…	http://www.gsea-msigdb.org/gsea/msigdb/cards/GO_G_PROTEIN_COUPLED_RECEPTOR_SIGNALING_PATHWAY
GWAScatalog	Empathy quotient	14	7	2.74258e+07	4.97778e+09	ZDHHC1:HSD11B2:ATP6V0D1:ENKD1:GFOD2:RANBP10:TSNAXIP1
GWAScatalog	HDL cholesterol	233	22	3.31444e+09	0.00030078573615892085	CERS2:ALOX5:MARCH8:ACP2:FOLH1:LRRC29:CTCF:GFOD2:RANBP10:EDC4:PSKH1:LCAT:VPS4A:SP6:ZNRF3:MTTP:PLA2G12A:ARHGEF28:TNFAIP8:CSMD1:NIPSNAP3B:ABCA1
GWAScatalog	Alcoholic chronic pancreatitis	80	12	1.36103e+10	0.0008234222824844933	TTC12:ANKK1:DRD2:ZFP1:CTRB2:CTRB1:BCAR1:C21orf33:TRPV5:C7orf34:KEL:OR9A2
GWAScatalog	Waist-to-hip ratio adjusted for body mass index	104	13	4.0947e+09	0.001857968411736721	BMP4:ZNF423:ZDHHC1:HSD11B2:CTRB2:SP6:BCL2:ZNRF3:LEKR1:ARHGEF28:TNFAIP8:HSD17B4:ABCA1
GWAScatalog	Pancreatic cancer	108	13	6.2546e+09	0.002270420137665608	NR5A2:ZFP1:CTRB2:CTRB1:BCAR1:SP6:TTC28:CHEK2:HSCB:CCDC117:XBP1:ZNRF3:DPP6
GWAScatalog	Reading disability or specific language impairment adjusted for intelligence quotient (pleiotropy)	12	5	9.10151e+09	0.002272248619211934	COX6A1:TRIAP1:GATC:SRSF9:DYNLL1
GWAScatalog	Thrombin-activatable fibrinolysis inhibitor levels	12	5	9.10151e+09	0.002272248619211934	HCAR1:HCAR3:DENR:SNTG2:TPO
GWAScatalog	Rhegmatogenous retinal detachment	20	6	1.00154e+10	0.002272248619211934	CTSS:ARNT:CERS2:ANXA9:FAM63A:PRUNE
GWAScatalog	Reading disability or specific language impairment (pleiotropy)	13	5	1.44648e+11	0.002917071155541996	COX6A1:TRIAP1:GATC:SRSF9:DYNLL1
GWAScatalog	Intraocular pressure	346	24	2.21187e+09	0.004014546203101412	KIAA1462:PTPRJ:OR4C5:OR4A47:TRIM49B:FOLH1:OR4C13:OR4P4:OR4S2:OR8H3:OR5J2:OR5T2:OR5AP2:OR5AR1:C11orf53:DYNLL1:GRTP1:ELMO3:DCC:CPXM1:ETS2:GMDS:DGKB:ABCA1
GWAScatalog	Logical memory (delayed recall) in normal cognition	47	8	3.1144e+11	0.00488310222350142	LRRC10:BEST3:BMP4:CIRH1A:SNTB2:VPS4A:COG8:PDF:RP11-343C2.12
GWAScatalog	Esophageal squamous cell carcinoma	15	5	3.2285e+11	0.00488310222350142	CHEK2:CCDC117:XBP1:CDKN2A:CDKN2B
GWAScatalog	HDL cholesterol levels x alcohol consumption (drinkers vs non-drinkers) interaction (2df)	128	13	3.95854e+07	0.005526729797776339	MARCH8:FOLH1:OR4C6:OR5D13:DNAJC22:SPATS2:DPEP3:DPEP2:SP6:GPR75-ASB3:ASB3:LEKR1:ABCA1
GWAScatalog	Type 2 diabetes	438	27	5.49809e+10	0.007127886150003868	FAM63A:ABCB10:JMJD1C:ABCB9:NRXN3:PRC1:CTRB1:BCAR1:WWOX:OSBPL7:SP6:CALCOCO2:ATP5G1:BCL2:CAPN13:GALNT14:GPR75-ASB3:ASB3:GLI2:ZRANB3:ATP6AP1L:DGKB:CSMD1:PURG:CDKN2A:CDKN2B:ROR2
GWAScatalog	HDL cholesterol levels x alcohol consumption (regular vs non-regular drinkers) interaction (2df)	118	12	7.69555e+10	0.008737593641634693	MARCH8:FOLH1:OR4C6:OR5D13:DNAJC22:SPATS2:DPEP3:DPEP2:SP6:RAB3GAP1:LEKR1:ABCA1
GWAScatalog	Schizophrenia	704	37	7.70256e+10	0.008737593641634693	JMJD1C:TTC12:DRD2:GUCY2C:HIP1R:ABCB9:NRXN3:MAN2A2:RLTPR:ACD:PARD6A:ENKD1:C16orf86:GFOD2:RANBP10:TSNAXIP1:CENPT:THAP11:NUTF2:EDC4:NRN1L:PSKH1:CTRL:PSMB10:LCAT:SLC12A4:DPEP3:DPEP2:DUS2:DDX28:DCC:ETS2:FAM184A:HSPB1:LMBR1:CSMD1:KDM4C
GWAScatalog	HDL cholesterol levels in current drinkers	106	11	0.0001267024338633388	0.013527348085997643	MARCH8:FOLH1:OR4C6:OR5D13:DNAJC22:SPATS2:DPEP3:DPEP2:SP6:LEKR1:ABCA1
GWAScatalog	Hemostatic factors and hematological phenotypes	21	5	0.00019154429173956302	0.018546213809425966	F5:OR5AP2:OR5AR1:OR9G1:OR9G4
GWAScatalog	Body mass index	1192	53	0.00019414769277085033	0.018546213809425966	CTSS:ARNT:SETDB1:CERS2:ANXA9:FAM63A:BNIPL:REEP3:RNH1:C11orf53:TTC12:ANKK1:DRD2:CPNE8:HIP1R:TSC22D1:GALNT16:NRXN3:CHGA:ITPK1:KCTD19:TANGO6:HAS3:CHTF8:CHTF8:CIRH1A:SNTB2:VPS4A:COG8:PDF:RP11-343C2.12:OSBPL7:MRPL10:LRRC46:SP6:SP2:PNPO:PRR15L:CDK5RAP3:DCC:BCL2:SNTG2:PSME4:CCNT2:MAP3K19:RAB3GAP1:ZRANB3:R3HDM1:ZNF133:ETS2:TTC28:CCNL1:ZNF12:CSMD3:KDM4C
GWAScatalog	Ovarian cancer	65	8	0.00032823948683701295	0.029787733430458926	GCLM:CASC10:SKIDA1:MLLT10:DNAJC1:TIPARP:FABP4:FABP12
GWAScatalog	Diastolic blood pressure x smoking status (current vs non-current) interaction (1df test)	15	4	0.0005460253092564892	0.04719218744288229	FZD8:GPR75-ASB3:ASB3:GPR75
Chemical_and_Genetic_pertubation	PROVENZANI_METASTASIS_UP	196	19	1.41133e+10	0.004660213375058472	FAM21C:ZWINT:CUL4A:LAMP1:TMEM208:ATP6V0D1:CTCF:ACD:THAP11:EDC4:SNTB2:VPS4A:PDF:WWOX:XRCC5:TDGF1:PROM1:KDM4C:CDKN2A	http://www.gsea-msigdb.org/gsea/msigdb/cards/PROVENZANI_METASTASIS_UP
Positional_gene_sets	chr16q22	120	54	7.74821e-39	2.31671e-35	C16orf70:B3GNT9:TRADD:FBXL8:HSF4:NOL3:KIAA0895L:EXOC3L1:E2F4:ELMO3:LRRC29:TMEM208:FHOD1:SLC9A5:PLEKHG4:KCTD19:LRRC36:TPPP3:ZDHHC1:HSD11B2:ATP6V0D1:AGRP:FAM65A:CTCF:RLTPR:ACD:PARD6A:ENKD1:C16orf86:GFOD2:RANBP10:TSNAXIP1:CENPT:THAP11:NUTF2:EDC4:NRN1L:PSKH1:CTRL:PSMB10:LCAT:SLC12A4:DPEP3:DPEP2:DUS2:DDX28:TANGO6:HAS3:CHTF8:CHTF8:CIRH1A:SNTB2:VPS4A:COG8:PDF:RP11-343C2.12	http://www.gsea-msigdb.org/gsea/msigdb/cards/chr16q22
Positional_gene_sets	chr11q12	196	41	4.77423e-10	7.13748e-08	OR5L1:OR5D18:OR5L2:OR5D16:TRIM51:OR5W2:OR5I1:OR10AG1:OR5F1:OR5AS1:OR8I2:OR8H2:OR8H3:OR8J3:OR8K5:OR5J2:OR5T2:OR5T3:OR5T1:OR8H1:OR8K3:OR8K1:OR8J1:OR8U1:OR5R1:OR5M9:OR5M3:OR5M8:OR5M11:OR5M10:OR5M1:OR5AP2:OR5AR1:OR9G1:OR9G4:LRRC55:MS4A6E:MS4A7:MS4A14:MS4A5:MS4A1	http://www.gsea-msigdb.org/gsea/msigdb/cards/chr11q12
Positional_gene_sets	chr11p11	68	14	2.63649e+07	2.6277e+09	ACP2:PTPRJ:OR4B1:OR4X2:OR4X1:OR4S1:OR4C3:OR4C5:OR4A47:TRIM49B:TRIM64C:FOLH1:OR4C13:OR4C12	http://www.gsea-msigdb.org/gsea/msigdb/cards/chr11p11
Positional_gene_sets	chr11q11	13	7	1.40364e+08	1.04922e+08	OR4C16:OR4C11:OR4P4:OR4S2:OR4C6:OR5D13:OR5D14	http://www.gsea-msigdb.org/gsea/msigdb/cards/chr11q11
Positional_gene_sets	chr14q31	16	6	2.26687e+09	0.00013555902602200507	KCNK10:SPATA7:PTPN21:ZC3H14:EML5:TTC8	http://www.gsea-msigdb.org/gsea/msigdb/cards/chr14q31
Positional_gene_sets	chr12q24	213	17	6.30013e+10	0.0031395638800948197	COX6A1:TRIAP1:GATC:SRSF9:DYNLL1:COQ5:RNF10:POP5:CABP1:HCAR1:HCAR2:HCAR3:DENR:CCDC62:HIP1R:VPS37B:ABCB9	http://www.gsea-msigdb.org/gsea/msigdb/cards/chr12q24
Positional_gene_sets	chr4q23	19	5	0.0001144052010846152	0.0048867364463285635	C4orf17:TRMT10A:MTTP:RP11-766F14.2:DAPP1	http://www.gsea-msigdb.org/gsea/msigdb/cards/chr4q23
Positional_gene_sets	chr7q34	58	8	0.0001467637955882037	0.005485296860109113	TRPV5:C7orf34:KEL:OR9A2:OR6V1:PIP:TAS2R39:TAS2R40	http://www.gsea-msigdb.org/gsea/msigdb/cards/chr7q34
Positional_gene_sets	chr8p12	21	5	0.00019154429173956302	0.006363527025569927	GSR:PPP2CB:TEX15:PURG:WRN	http://www.gsea-msigdb.org/gsea/msigdb/cards/chr8p12
Positional_gene_sets	chr11p15	297	19	0.000432900610401418	0.0129437282510024	RNH1:HRAS:LRRC56:C11orf35:RASSF7:PHRF1:IRF7:CDHR5:SCT:DRD4:DEAF1:TRIM5:TRIM22:OR56B1:OR52N4:OR52N5:OR5P2:OR5P3:OR10A6	http://www.gsea-msigdb.org/gsea/msigdb/cards/chr11p15
Positional_gene_sets	chr6q22	59	7	0.0009632772639424025	0.02579428042049375	KPNA5:FAM162B:GPRC6A:RFX6:MCM9:ASF1A:FAM184A	http://www.gsea-msigdb.org/gsea/msigdb/cards/chr6q22
Positional_gene_sets	chr15q26	77	8	0.0010352219566753345	0.02579428042049375	MAN2A2:UNC45A:HDDC3:RCCD1:PRC1:VPS33B:MEF2A:LYSMD4	http://www.gsea-msigdb.org/gsea/msigdb/cards/chr15q26
Positional_gene_sets	chr10q11	66	7	0.0018736391989588076	0.04309370157605258	ZNF32:ALOX5:MARCH8:ZFAND4:FAM21C:FAM25E:AGAP4:AGAP8	http://www.gsea-msigdb.org/gsea/msigdb/cards/chr10q11
GO_mf	GO_OLFACTORY_RECEPTOR_ACTIVITY	380	66	1.17523e-18	1.93325e-15	OR10T2:OR10K2:OR10K1:OR10R2:OR6Y1:OR6P1:OR10X1:OR10Z1:OR56B1:OR52N4:OR52N5:OR5P2:OR5P3:OR10A6:OR4B1:OR4X2:OR4X1:OR4S1:OR4C3:OR4C5:OR4A47:OR4C13:OR4C12:OR4C16:OR4C11:OR4P4:OR4S2:OR4C6:OR5D13:OR5D14:OR5L1:OR5D18:OR5L2:OR5D16:OR5W2:OR5I1:OR10AG1:OR5F1:OR5AS1:OR8I2:OR8H2:OR8H3:OR8J3:OR8K5:OR5J2:OR5T2:OR5T3:OR5T1:OR8H1:OR8K3:OR8K1:OR8J1:OR8U1:OR5R1:OR5M9:OR5M3:OR5M8:OR5M11:OR5M10:OR5M1:OR5AP2:OR5AR1:O…	http://www.gsea-msigdb.org/gsea/msigdb/cards/GO_OLFACTORY_RECEPTOR_ACTIVITY
GO_mf	GO_ODORANT_BINDING	84	33	3.16066e-15	2.59964e-11	OR5P2:OR5P3:OR5D13:OR5D14:OR5L1:OR5D18:OR5L2:OR5D16:OR5W2:OR5I1:OR5F1:OR5AS1:OR8I2:OR8H2:OR8H3:OR8J3:OR8K5:OR5J2:OR8H1:OR8K3:OR8K1:OR8J1:OR8U1:OR5R1:OR5M9:OR5M3:OR5M8:OR5M11:OR5M10:OR5M1:OR5AP2:OR5AR1:OR9G4	http://www.gsea-msigdb.org/gsea/msigdb/cards/GO_ODORANT_BINDING
GO_mf	GO_G_PROTEIN_COUPLED_RECEPTOR_ACTIVITY	807	79	5.53534e-09	3.03521e-05	GPR3:OR10T2:OR10K2:OR10K1:OR10R2:OR6Y1:OR6P1:OR10X1:OR10Z1:FZD8:DRD4:OR56B1:OR52N4:OR52N5:OR5P2:OR5P3:OR10A6:OR4B1:OR4X2:OR4X1:OR4S1:OR4C3:OR4C5:OR4A47:OR4C13:OR4C12:OR4C16:OR4C11:OR4P4:OR4S2:OR4C6:OR5D13:OR5D14:OR5L1:OR5D18:OR5L2:OR5D16:OR5W2:OR5I1:OR10AG1:OR5F1:OR5AS1:OR8I2:OR8H2:OR8H3:OR8J3:OR8K5:OR5J2:OR5T2:OR5T3:OR5T1:OR8H1:OR8K3:OR8K1:OR8J1:OR8U1:OR5R1:OR5M9:OR5M3:OR5M8:OR5M11:OR5M10:OR5M1:…	http://www.gsea-msigdb.org/gsea/msigdb/cards/GO_G_PROTEIN_COUPLED_RECEPTOR_ACTIVITY
GO_mf	GO_TRANSMEMBRANE_SIGNALING_RECEPTOR_ACTIVITY	1199	87	0.00921648	3.79028	GPR3:ANXA9:OR10T2:OR10K2:OR10K1:OR10R2:OR6Y1:OR6P1:OR10X1:OR10Z1:SELE:FZD8:DRD4:OR56B1:OR52N4:OR52N5:OR5P2:OR5P3:OR10A6:OR4B1:OR4X2:OR4X1:OR4S1:OR4C3:OR4C5:OR4A47:OR4C13:OR4C12:OR4C16:OR4C11:OR4P4:OR4S2:OR4C6:OR5D13:OR5D14:OR5L1:OR5D18:OR5L2:OR5D16:OR5W2:OR5I1:OR10AG1:OR5F1:OR5AS1:OR8I2:OR8H2:OR8H3:OR8J3:OR8K5:OR5J2:OR5T2:OR5T3:OR5T1:OR8H1:OR8K3:OR8K1:OR8J1:OR8U1:OR5R1:OR5M9:OR5M3:OR5M8:OR5M11:OR…	http://www.gsea-msigdb.org/gsea/msigdb/cards/GO_TRANSMEMBRANE_SIGNALING_RECEPTOR_ACTIVITY
GO_mf	GO_MOLECULAR_TRANSDUCER_ACTIVITY	1463	93	26.3687	8.67531	GPR3:ARNT:ANXA9:OR10T2:OR10K2:OR10K1:OR10R2:OR6Y1:OR6P1:OR10X1:OR10Z1:SELE:NR5A2:FZD8:DRD4:TRIM5:OR56B1:OR52N4:OR52N5:OR5P2:OR5P3:OR10A6:OR4B1:OR4X2:OR4X1:OR4S1:OR4C3:OR4C5:OR4A47:OR4C13:OR4C12:OR4C16:OR4C11:OR4P4:OR4S2:OR4C6:OR5D13:OR5D14:OR5L1:OR5D18:OR5L2:OR5D16:OR5W2:OR5I1:OR10AG1:OR5F1:OR5AS1:OR8I2:OR8H2:OR8H3:OR8J3:OR8K5:OR5J2:OR5T2:OR5T3:OR5T1:OR8H1:OR8K3:OR8K1:OR8J1:OR8U1:OR5R1:OR5M9:OR5M…	http://www.gsea-msigdb.org/gsea/msigdb/cards/GO_MOLECULAR_TRANSDUCER_ACTIVITY
Curated_gene_sets	REACTOME_OLFACTORY_SIGNALING_PATHWAY	391	68	9.70704e-21	5.33984e-18	OR10T2:OR10K2:OR10K1:OR10R2:OR6Y1:OR6P1:OR10X1:OR10Z1:REEP3:OR56B1:OR52N4:OR52N5:OR5P2:OR5P3:OR10A6:OR4B1:OR4X2:OR4X1:OR4S1:OR4C3:OR4C5:OR4A47:OR4C13:OR4C12:OR4C16:OR4C11:OR4P4:OR4S2:OR4C6:OR5D13:OR5D14:OR5L1:OR5D18:OR5L2:OR5D16:OR5W2:OR5I1:OR10AG1:OR5F1:OR5AS1:OR8I2:OR8H2:OR8H3:OR8J3:OR8K5:OR5J2:OR5T2:OR5T3:OR5T1:OR8H1:OR8K3:OR8K1:OR8J1:OR8U1:OR5R1:OR5M9:OR5M3:OR5M8:OR5M11:OR5M10:OR5M1:OR5AP2:OR…	http://www.gsea-msigdb.org/gsea/msigdb/cards/REACTOME_OLFACTORY_SIGNALING_PATHWAY
Curated_gene_sets	KEGG_OLFACTORY_TRANSDUCTION	383	63	1.12642e-15	3.09823e-13	OR10T2:OR10K2:OR10K1:OR10R2:OR6Y1:OR10X1:OR10Z1:OR56B1:OR52N4:OR52N5:OR5P2:OR5P3:OR10A6:OR4B1:OR4X2:OR4X1:OR4S1:OR4C3:OR4A47:OR4C13:OR4C12:OR4C16:OR4C11:OR4P4:OR4S2:OR4C6:OR5D13:OR5D14:OR5L1:OR5D18:OR5L2:OR5D16:OR5I1:OR10AG1:OR5F1:OR5AS1:OR8I2:OR8H2:OR8H3:OR8J3:OR8K5:OR5J2:OR5T2:OR5T3:OR5T1:OR8H1:OR8K3:OR8K1:OR8J1:OR8U1:OR5R1:OR5M9:OR5M3:OR5M8:OR5M11:OR5M10:OR5M1:OR5AP2:OR5AR1:OR9G1:OR9G4:OR9A2:O…	http://www.gsea-msigdb.org/gsea/msigdb/cards/KEGG_OLFACTORY_TRANSDUCTION
Curated_gene_sets	REACTOME_G_ALPHA_S_SIGNALLING_EVENTS	531	71	8.83081e-15	1.61928e-10	OR10T2:OR10K2:OR10K1:OR10R2:OR6Y1:OR6P1:OR10X1:OR10Z1:REEP3:SCT:OR56B1:OR52N4:OR52N5:OR5P2:OR5P3:OR10A6:OR4B1:OR4X2:OR4X1:OR4S1:OR4C3:OR4C5:OR4A47:OR4C13:OR4C12:OR4C16:OR4C11:OR4P4:OR4S2:OR4C6:OR5D13:OR5D14:OR5L1:OR5D18:OR5L2:OR5D16:OR5W2:OR5I1:OR10AG1:OR5F1:OR5AS1:OR8I2:OR8H2:OR8H3:OR8J3:OR8K5:OR5J2:OR5T2:OR5T3:OR5T1:OR8H1:OR8K3:OR8K1:OR8J1:OR8U1:OR5R1:OR5M9:OR5M3:OR5M8:OR5M11:OR5M10:OR5M1:OR5AP…	http://www.gsea-msigdb.org/gsea/msigdb/cards/REACTOME_G_ALPHA_S_SIGNALLING_EVENTS
Curated_gene_sets	REACTOME_SIGNALING_BY_GPCR	1160	88	0.000341395	0.469504	OR10T2:OR10K2:OR10K1:OR10R2:OR6Y1:OR6P1:OR10X1:OR10Z1:FZD8:REEP3:HRAS:SCT:DRD4:OR56B1:OR52N4:OR52N5:OR5P2:OR5P3:OR10A6:OR4B1:OR4X2:OR4X1:OR4S1:OR4C3:OR4C5:OR4A47:OR4C13:OR4C12:OR4C16:OR4C11:OR4P4:OR4S2:OR4C6:OR5D13:OR5D14:OR5L1:OR5D18:OR5L2:OR5D16:OR5W2:OR5I1:OR10AG1:OR5F1:OR5AS1:OR8I2:OR8H2:OR8H3:OR8J3:OR8K5:OR5J2:OR5T2:OR5T3:OR5T1:OR8H1:OR8K3:OR8K1:OR8J1:OR8U1:OR5R1:OR5M9:OR5M3:OR5M8:OR5M11:OR5…	http://www.gsea-msigdb.org/gsea/msigdb/cards/REACTOME_SIGNALING_BY_GPCR
Curated_gene_sets	PROVENZANI_METASTASIS_UP	196	19	1.41133e+10	0.0015527458374437707	FAM21C:ZWINT:CUL4A:LAMP1:TMEM208:ATP6V0D1:CTCF:ACD:THAP11:EDC4:SNTB2:VPS4A:PDF:WWOX:XRCC5:TDGF1:PROM1:KDM4C:CDKN2A	http://www.gsea-msigdb.org/gsea/msigdb/cards/PROVENZANI_METASTASIS_UP
KEGG	KEGG_OLFACTORY_TRANSDUCTION	383	63	1.12642e-15	2.09515e-13	OR10T2:OR10K2:OR10K1:OR10R2:OR6Y1:OR10X1:OR10Z1:OR56B1:OR52N4:OR52N5:OR5P2:OR5P3:OR10A6:OR4B1:OR4X2:OR4X1:OR4S1:OR4C3:OR4A47:OR4C13:OR4C12:OR4C16:OR4C11:OR4P4:OR4S2:OR4C6:OR5D13:OR5D14:OR5L1:OR5D18:OR5L2:OR5D16:OR5I1:OR10AG1:OR5F1:OR5AS1:OR8I2:OR8H2:OR8H3:OR8J3:OR8K5:OR5J2:OR5T2:OR5T3:OR5T1:OR8H1:OR8K3:OR8K1:OR8J1:OR8U1:OR5R1:OR5M9:OR5M3:OR5M8:OR5M11:OR5M10:OR5M1:OR5AP2:OR5AR1:OR9G1:OR9G4:OR9A2:O…	http://www.gsea-msigdb.org/gsea/msigdb/cards/KEGG_OLFACTORY_TRANSDUCTION
TF_targets	CYTAGCAAY_UNKNOWN	146	14	3.84016e+11	0.023424978869215598	DNAJC1:HRAS:LRRC56:DYNLL1:TSC22D1:SPATA7:TPPP3:MRPL10:LRRC46:DZANK1:POLR3F:CCNG2:FILIP1:GRIK2	http://www.gsea-msigdb.org/gsea/msigdb/cards/CYTAGCAAY_UNKNOWN
Reactome	REACTOME_OLFACTORY_SIGNALING_PATHWAY	391	68	9.70704e-21	1.45509e-16	OR10T2:OR10K2:OR10K1:OR10R2:OR6Y1:OR6P1:OR10X1:OR10Z1:REEP3:OR56B1:OR52N4:OR52N5:OR5P2:OR5P3:OR10A6:OR4B1:OR4X2:OR4X1:OR4S1:OR4C3:OR4C5:OR4A47:OR4C13:OR4C12:OR4C16:OR4C11:OR4P4:OR4S2:OR4C6:OR5D13:OR5D14:OR5L1:OR5D18:OR5L2:OR5D16:OR5W2:OR5I1:OR10AG1:OR5F1:OR5AS1:OR8I2:OR8H2:OR8H3:OR8J3:OR8K5:OR5J2:OR5T2:OR5T3:OR5T1:OR8H1:OR8K3:OR8K1:OR8J1:OR8U1:OR5R1:OR5M9:OR5M3:OR5M8:OR5M11:OR5M10:OR5M1:OR5AP2:OR…	http://www.gsea-msigdb.org/gsea/msigdb/cards/REACTOME_OLFACTORY_SIGNALING_PATHWAY
Reactome	REACTOME_G_ALPHA_S_SIGNALLING_EVENTS	531	71	8.83081e-15	6.61869e-12	OR10T2:OR10K2:OR10K1:OR10R2:OR6Y1:OR6P1:OR10X1:OR10Z1:REEP3:SCT:OR56B1:OR52N4:OR52N5:OR5P2:OR5P3:OR10A6:OR4B1:OR4X2:OR4X1:OR4S1:OR4C3:OR4C5:OR4A47:OR4C13:OR4C12:OR4C16:OR4C11:OR4P4:OR4S2:OR4C6:OR5D13:OR5D14:OR5L1:OR5D18:OR5L2:OR5D16:OR5W2:OR5I1:OR10AG1:OR5F1:OR5AS1:OR8I2:OR8H2:OR8H3:OR8J3:OR8K5:OR5J2:OR5T2:OR5T3:OR5T1:OR8H1:OR8K3:OR8K1:OR8J1:OR8U1:OR5R1:OR5M9:OR5M3:OR5M8:OR5M11:OR5M10:OR5M1:OR5AP…	http://www.gsea-msigdb.org/gsea/msigdb/cards/REACTOME_G_ALPHA_S_SIGNALLING_EVENTS
Reactome	REACTOME_SIGNALING_BY_GPCR	1160	88	0.000341395	0.170584	OR10T2:OR10K2:OR10K1:OR10R2:OR6Y1:OR6P1:OR10X1:OR10Z1:FZD8:REEP3:HRAS:SCT:DRD4:OR56B1:OR52N4:OR52N5:OR5P2:OR5P3:OR10A6:OR4B1:OR4X2:OR4X1:OR4S1:OR4C3:OR4C5:OR4A47:OR4C13:OR4C12:OR4C16:OR4C11:OR4P4:OR4S2:OR4C6:OR5D13:OR5D14:OR5L1:OR5D18:OR5L2:OR5D16:OR5W2:OR5I1:OR10AG1:OR5F1:OR5AS1:OR8I2:OR8H2:OR8H3:OR8J3:OR8K5:OR5J2:OR5T2:OR5T3:OR5T1:OR8H1:OR8K3:OR8K1:OR8J1:OR8U1:OR5R1:OR5M9:OR5M3:OR5M8:OR5M11:OR5…	http://www.gsea-msigdb.org/gsea/msigdb/cards/REACTOME_SIGNALING_BY_GPCR
Canonical_Pathways	REACTOME_OLFACTORY_SIGNALING_PATHWAY	391	68	9.70704e-21	2.13458e-16	OR10T2:OR10K2:OR10K1:OR10R2:OR6Y1:OR6P1:OR10X1:OR10Z1:REEP3:OR56B1:OR52N4:OR52N5:OR5P2:OR5P3:OR10A6:OR4B1:OR4X2:OR4X1:OR4S1:OR4C3:OR4C5:OR4A47:OR4C13:OR4C12:OR4C16:OR4C11:OR4P4:OR4S2:OR4C6:OR5D13:OR5D14:OR5L1:OR5D18:OR5L2:OR5D16:OR5W2:OR5I1:OR10AG1:OR5F1:OR5AS1:OR8I2:OR8H2:OR8H3:OR8J3:OR8K5:OR5J2:OR5T2:OR5T3:OR5T1:OR8H1:OR8K3:OR8K1:OR8J1:OR8U1:OR5R1:OR5M9:OR5M3:OR5M8:OR5M11:OR5M10:OR5M1:OR5AP2:OR…	http://www.gsea-msigdb.org/gsea/msigdb/cards/REACTOME_OLFACTORY_SIGNALING_PATHWAY
Canonical_Pathways	KEGG_OLFACTORY_TRANSDUCTION	383	63	1.12642e-15	1.2385e-13	OR10T2:OR10K2:OR10K1:OR10R2:OR6Y1:OR10X1:OR10Z1:OR56B1:OR52N4:OR52N5:OR5P2:OR5P3:OR10A6:OR4B1:OR4X2:OR4X1:OR4S1:OR4C3:OR4A47:OR4C13:OR4C12:OR4C16:OR4C11:OR4P4:OR4S2:OR4C6:OR5D13:OR5D14:OR5L1:OR5D18:OR5L2:OR5D16:OR5I1:OR10AG1:OR5F1:OR5AS1:OR8I2:OR8H2:OR8H3:OR8J3:OR8K5:OR5J2:OR5T2:OR5T3:OR5T1:OR8H1:OR8K3:OR8K1:OR8J1:OR8U1:OR5R1:OR5M9:OR5M3:OR5M8:OR5M11:OR5M10:OR5M1:OR5AP2:OR5AR1:OR9G1:OR9G4:OR9A2:O…	http://www.gsea-msigdb.org/gsea/msigdb/cards/KEGG_OLFACTORY_TRANSDUCTION
Canonical_Pathways	REACTOME_G_ALPHA_S_SIGNALLING_EVENTS	531	71	8.83081e-15	6.47298e-12	OR10T2:OR10K2:OR10K1:OR10R2:OR6Y1:OR6P1:OR10X1:OR10Z1:REEP3:SCT:OR56B1:OR52N4:OR52N5:OR5P2:OR5P3:OR10A6:OR4B1:OR4X2:OR4X1:OR4S1:OR4C3:OR4C5:OR4A47:OR4C13:OR4C12:OR4C16:OR4C11:OR4P4:OR4S2:OR4C6:OR5D13:OR5D14:OR5L1:OR5D18:OR5L2:OR5D16:OR5W2:OR5I1:OR10AG1:OR5F1:OR5AS1:OR8I2:OR8H2:OR8H3:OR8J3:OR8K5:OR5J2:OR5T2:OR5T3:OR5T1:OR8H1:OR8K3:OR8K1:OR8J1:OR8U1:OR5R1:OR5M9:OR5M3:OR5M8:OR5M11:OR5M10:OR5M1:OR5AP…	http://www.gsea-msigdb.org/gsea/msigdb/cards/REACTOME_G_ALPHA_S_SIGNALLING_EVENTS
Canonical_Pathways	REACTOME_SIGNALING_BY_GPCR	1160	88	0.000341395	0.187682	OR10T2:OR10K2:OR10K1:OR10R2:OR6Y1:OR6P1:OR10X1:OR10Z1:FZD8:REEP3:HRAS:SCT:DRD4:OR56B1:OR52N4:OR52N5:OR5P2:OR5P3:OR10A6:OR4B1:OR4X2:OR4X1:OR4S1:OR4C3:OR4C5:OR4A47:OR4C13:OR4C12:OR4C16:OR4C11:OR4P4:OR4S2:OR4C6:OR5D13:OR5D14:OR5L1:OR5D18:OR5L2:OR5D16:OR5W2:OR5I1:OR10AG1:OR5F1:OR5AS1:OR8I2:OR8H2:OR8H3:OR8J3:OR8K5:OR5J2:OR5T2:OR5T3:OR5T1:OR8H1:OR8K3:OR8K1:OR8J1:OR8U1:OR5R1:OR5M9:OR5M3:OR5M8:OR5M11:OR5…	http://www.gsea-msigdb.org/gsea/msigdb/cards/REACTOME_SIGNALING_BY_GPCR
